# Supplementary material for: Enantioselective intramolecular tandem cyclization of o-alkynylbenzamides: generation of enantioenriched CF3-containing spiro-isoindolinone-indoles
Source: Royal Society of Chemistry journal article supplement (doi:10.1039/d4qo00165f), 2024-01-01
Supplement: d4qo00165f1.pdf [file d4qo00165f1.pdf]

## 1. General Information

Chemicals were purchased from commercial suppliers and used without further purification unless otherwise stated. Chiral phosphoric acids **CPA1-CPA10** and racemic phosphoric acid were purchased from commercial suppliers. Solvents were dried and purified according to the standard procedures before use. Reactions were monitored by TLC. Racemic products were obtained from corresponding substrates catalyzed by racemic phosphoric acid at 60 °C. Flash column chromatography was performed on silica gels (200-300 mesh). <sup>1</sup>H NMR and <sup>13</sup>C NMR (300 or 400 and 75 or 101 MHz, respectively) spectra were recorded on a Bruker 300 or 400 MHz NMR spectrometer in DMSO-d<sub>6</sub>. <sup>1</sup>H NMR chemical shifts are reported in ppm (δ) relative to tetramethylsilane (TMS) with the solvent resonance employed as the internal standard (DMSO-d<sub>6</sub>, δ 2.50 ppm). Data are reported as follows: chemical shift, multiplicity (s = singlet, d = doublet, t = triplet, dd = doublet of doublets, dt = doublet of triplets, q = quartet, m = multiplet), coupling constants (Hz) and integration. <sup>13</sup>C NMR chemical shifts are reported in ppm from tetramethylsilane (TMS) with the solvent resonances as the internal standard (DMSO-d<sub>6</sub>, δ 39.52 ppm). HRMS data were obtained on a Bruker Daltonics. Inc mass instrument (ESI). Chiralpak AD-H, IA, IC, OD column was purchased from Daicel Chemical Industries (Hong Kong, China). Optical rotations were measured on a Perkin-Elmer 241 Polarimeter. Melting points were recorded on a Buchi Melting Point B-545.

## 2. Substrate Preparation

### General Procedure A

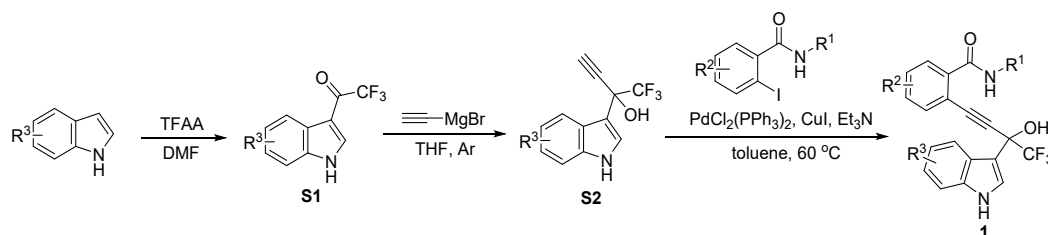

The propargylic alcohols were prepared according to a modified literature

procedure. The procedure is described using **1a** as an example.

Trifluoroacetic anhydride (4.2 g, 20 mmol) was added at 0 °C to a solution of indole (1.17 g, 10 mmol) in N,N-dimethylformamide (20 mL). The resulting mixture was stirred for 3 h at room temperature. The mixture was treated with ice-cold water to obtain a solid. The solid was separated by filtration and washed with water and *n*-pentane and dried under high vacuum to afford **S1** without further purification<sup>[1]</sup>.

In an ice bath at 0 °C, ethynyl magnesium bromide solution (0.5 M in THF) (30 mL, 15 mmol) was added to a dried 50 mL round bottom flask placed under argon. A solution of the 3-trifluoroacetyl indole **S1** (1.065 g, 5 mmol) in THF was added in a dropwise to the stirring solution of the Grignard reagent. The reaction was left at 25°C and until it was complete by TLC. The reaction was quenched with saturated NH<sub>4</sub>Cl (aq.) solution, extracted with EA and the organic layers were washed with saturated NaCl (aq.) solution. The organic layers were combined, dried over Na<sub>2</sub>SO<sub>4</sub> and concentrated under vacuum. The crude product was purified by silica gel chromatography (petroleum ether/ethyl acetate 5:1) to give 1,1,1-trifluoro-2-(1H-indol-3-yl)but-3-yn-2-ol **S2** as a yellow oil<sup>[2]</sup>.

A mixture of a bis(triphenylphosphine)palladium(II) chloride (0.07g, 0.1 mmol), copper iodide (0.04 g, 0.2 mmol), 2-iodo-N-phenylbenzamide(0.76 g, 2.4 mmol), **S2** (0.48 g, 2 mmol), Et<sub>3</sub>N (2.4 mL) and toluene (10 mL) was stirred at 60 °C under an argon atmosphere. After being stirred for 2 h at 60 °C, the reaction was quenched with saturated NH<sub>4</sub>Cl solution and extracted with EA. The combined organic layer was washed with saturated NaCl solution, dried over Na<sub>2</sub>SO<sub>4</sub>. Removal of the solvent and column chromatography (petroleum ether / ethyl acetate= 5/1 to 2/1) gave **1a** as a white solid<sup>[3]</sup>.

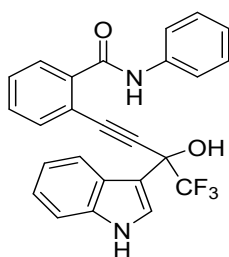

**N-phenyl-2-(4,4,4-trifluoro-3-hydroxy-3-(1H-indol-3-yl)but-1-yn-1-yl)benzamide (1a):** white solid, m.p.: 144.7-145.8 °C, 442 mg, 51% yield. <sup>1</sup>H NMR (400 MHz, DMSO-d<sub>6</sub>) δ 11.32 (s, 1H), 10.49 (s, 1H), 7.77 (d, *J* = 7.0 Hz, 3H), 7.66 (d, *J* = 12.6 Hz, 3H),

7.59 (s, 3H), 7.41–7.28 (m, 3H), 7.08 (t,  $J = 7.5$  Hz, 2H), 6.92 (t,  $J = 7.5$  Hz, 1H).  $^{13}\text{C}$  NMR (101 MHz, DMSO- $d_6$ )  $\delta$  166.2, 140.1, 139.2, 136.7, 133.1, 130.1, 129.4, 128.7, 127.8, 126.3, 124.5 (q,  $J = 287.8$  Hz), 125.0, 123.8, 121.4, 121.0, 119.9, 119.3, 119.0, 111.7, 111.1, 89.8, 83.1, 70.0 (q,  $J = 32.3$  Hz). HRMS (ESI) Calcd. for  $\text{C}_{25}\text{H}_{18}\text{F}_3\text{N}_2\text{O}_2^+$  [ $\text{M}+\text{H}^+$ ]: 435.1315, Found: 435.1325.

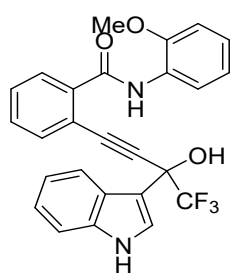

**N-(2-methoxyphenyl)-2-(4,4,4-trifluoro-3-hydroxy-3-(1H-**

**indol-3-yl)but-1-yn-1-yl)benzamide(1b):** yellow solid, m.p.:

98.3- 100.3 °C, 492 mg, 53%yield.  $^1\text{H}$  NMR (400 MHz, DMSO-

$d_6$ )  $\delta$  11.30 (s, 1H), 9.46 (s, 1H), 7.98 (d,  $J = 7.1$  Hz, 1H), 7.79 (d,

$J = 8.0$  Hz, 1H), 7.65 (d,  $J = 12.5$  Hz, 3H), 7.58 (d,  $J = 9.8$  Hz,

3H), 7.38 (d,  $J = 8.1$  Hz, 1H), 7.14 (t,  $J = 7.7$  Hz, 1H), 7.07 (dd,  $J = 17.5, 8.3$  Hz, 2H),

6.95 (d,  $J = 6.2$  Hz, 2H), 3.77 (s, 3H).  $^{13}\text{C}$  NMR (101 MHz, DMSO- $d_6$ )  $\delta$  165.8, 150.7,

139.4, 136.7, 133.4, 130.3, 129.4, 128.0, 126.9, 126.2, 125.4, 125.0, 124.5 (q,  $J =$

288.9 Hz), 123.0, 121.4, 120.9, 120.3, 119.2, 119.0, 111.7, 111.3, 111.1, 90.1, 83.2,

70.0 (q,  $J = 33.3$  Hz), 55.7. HRMS (ESI) Calcd. for  $\text{C}_{26}\text{H}_{20}\text{F}_3\text{N}_2\text{O}_3^+$  [ $\text{M}+\text{H}^+$ ]:

465.1421, Found: 465.1444.

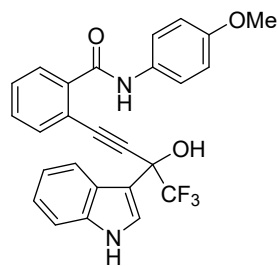

**N-(4-methoxyphenyl)-2-(4,4,4-trifluoro-3-hydroxy-3-(1H-**

**indol-3-yl)but-1-yn-1-yl)benzamide (1c):** yellow solid, m.p.:

130.1-132.5 °C, 399 mg, 43% yield.  $^1\text{H}$  NMR (300 MHz,

DMSO- $d_6$ )  $\delta$  11.34 (s, 1H), 10.36 (s, 1H), 7.77 (d,  $J = 8.0$  Hz,

1H), 7.72–7.60 (m, 5H), 7.58 (s, 3H), 7.37 (d,  $J = 8.2$  Hz, 1H),

7.07 (t,  $J = 7.5$  Hz, 1H), 6.91 (t,  $J = 9.9$  Hz, 3H), 3.72 (s, 3H).  $^{13}\text{C}$  NMR (101 MHz,

DMSO- $d_6$ )  $\delta$  165.7, 155.5, 140.2, 136.7, 133.1, 132.3, 130.0, 129.4, 127.7, 126.3,

125.0, 121.4, 121.0, 119.2, 119.0, 113.8, 111.7, 111.1, 89.7, 83.1, 70.0 (q,  $J = 32.3$

Hz), 55.2. HRMS (ESI) Calcd. for  $\text{C}_{26}\text{H}_{20}\text{F}_3\text{N}_2\text{O}_3^+$  [ $\text{M}+\text{H}^+$ ]: 465.1421, Found:

465.1426.

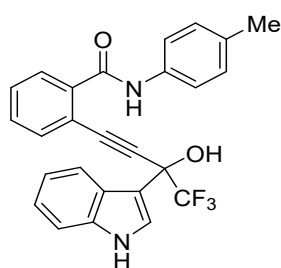

**N-(p-tolyl)-2-(4,4,4-trifluoro-3-hydroxy-3-(1H-indol-3-yl)but-1-yn-1-yl)benzamide (1d):** white solid, m.p.: 158.5–159.9 °C, 627 mg, 70% yield. <sup>1</sup>H NMR (400 MHz, DMSO-d<sub>6</sub>) δ 11.31 (s, 1H), 10.39 (s, 1H), 7.79 (d, *J* = 8.0 Hz, 1H), 7.71–7.60 (m, 5H), 7.57 (s, 3H), 7.38 (d, *J* = 8.1 Hz, 1H), 7.13 (d, *J* = 7.9 Hz, 2H), 7.08 (t, *J* = 7.5 Hz, 1H), 6.93 (t, *J* = 7.5 Hz, 1H), 2.26 (s, 3H). <sup>13</sup>C NMR (101 MHz, DMSO-d<sub>6</sub>) δ 166.0, 140.2, 136.7, 136.7, 133.1, 132.7, 130.0, 129.4, 129.1, 127.7, 126.3, 125.0, 124.5 (q, *J* = 287.8 Hz), 121.4, 121.0, 119.9, 119.2, 119.0, 111.7, 111.1, 89.7, 83.1, 70.0 (q, *J* = 33.3 Hz), 20.6. HRMS (ESI) Calcd. for C<sub>26</sub>H<sub>19</sub>F<sub>3</sub>N<sub>2</sub>NaO<sub>2</sub><sup>+</sup> [M+Na<sup>+</sup>]: 471.1291, Found: 471.1302.

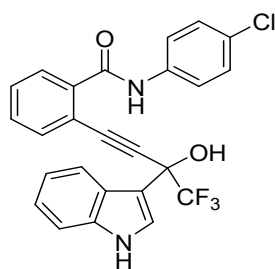

**N-(4-chlorophenyl)-2-(4,4,4-trifluoro-3-hydroxy-3-(1H-indol-3-yl)but-1-yn-1-yl)benzamide (1e):** white solid, m.p.: 174.3–175.9 °C, 347 mg, 37% yield. <sup>1</sup>H NMR (400 MHz, DMSO-d<sub>6</sub>) δ 11.31 (s, 1H), 10.63 (s, 1H), 7.78 (t, *J* = 8.0 Hz, 3H), 7.63 (s, 3H), 7.58 (s, 3H), 7.38 (d, *J* = 8.6 Hz, 3H), 7.08 (t, *J* = 7.5 Hz, 1H), 6.92 (t, *J* = 7.5 Hz, 1H). <sup>13</sup>C NMR (101 MHz, DMSO-d<sub>6</sub>) δ 166.3, 139.9, 138.1, 136.7, 133.1, 130.2, 129.5, 128.6, 127.8, 127.3, 126.1, 124.9, 124.5 (q, *J* = 286.8 Hz), 121.4, 121.3, 121.0, 119.3, 119.0, 111.8, 111.1, 89.8, 82.9, 70.0 (q, *J* = 33.3 Hz). HRMS(ESI) Calcd. for C<sub>26</sub>H<sub>16</sub>ClF<sub>3</sub>N<sub>2</sub>NaO<sub>2</sub><sup>+</sup> [M+Na<sup>+</sup>]: 491.0745 (<sup>35</sup>Cl), 493.0715 (<sup>37</sup>Cl), Found: 491.0755 (<sup>35</sup>Cl), 493.0738 (<sup>35</sup>Cl).

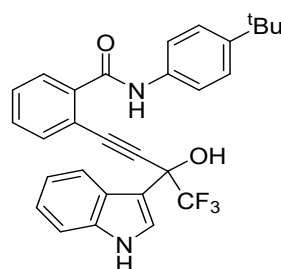

**N-(4-(tert-butyl)phenyl)-2-(4,4,4-trifluoro-3-hydroxy-3-(1H-indol-3-yl)but-1-yn-1-yl)benzamide (1f):** white solid, m.p.: 113.4–115.2 °C, 334 mg, 34% yield. <sup>1</sup>H NMR (400 MHz, DMSO-d<sub>6</sub>) δ 11.31 (s, 1H), 10.38 (s, 1H), 7.78 (d, *J* = 8.0 Hz, 1H), 7.70 (s, 1H), 7.65 (d, *J* = 8.6 Hz, 4H), 7.58 (d, *J* = 8.3 Hz, 3H), 7.43–7.26 (m, 3H), 7.07 (t, *J* = 7.5 Hz, 1H), 6.90 (t, *J* = 7.5 Hz, 1H), 1.26 (s, 9H). <sup>13</sup>C NMR (101 MHz, DMSO-d<sub>6</sub>) δ 166.1, 146.2, 140.1, 136.8, 136.6,

133.2, 130.1, 129.4, 127.8, 126.3, 125.4, 125.0, 124.6 (q,  $J = 286.8$  Hz), 121.5, 121.1, 119.8, 119.3, 119.1, 111.8, 111.2, 89.8, 83.2, 70.1 (q,  $J = 33.3$  Hz), 34.2, 31.3. HRMS (ESI) Calcd. for  $C_{29}H_{26}F_3N_2O_2^+ [M+H^+]$ : 491.1941, Found: 491.1948.

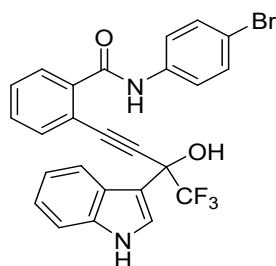

**N-(4-bromophenyl)-2-(4,4,4-trifluoro-3-hydroxy-3-(1H-indol-3-yl)but-1-yn-1-yl)benzamide (1g)**: white solid, m.p.: 146.7-148.1 °C, 513 mg, 50% yield.  $^1H$  NMR (400 MHz, DMSO- $d_6$ )  $\delta$  11.35 (s, 1H), 10.67 (s, 1H), 7.77 (t,  $J = 8.4$  Hz, 3H), 7.66 (s, 3H), 7.62 – 7.55 (m, 3H), 7.53 (d,  $J = 8.5$  Hz,

2H), 7.39 (d,  $J = 8.1$  Hz, 1H), 7.09 (t,  $J = 7.5$  Hz, 1H), 6.94 (t,  $J = 7.5$  Hz, 1H).  $^{13}C$  NMR (101 MHz, DMSO- $d_6$ )  $\delta$  166.3, 139.9, 138.6, 136.7, 133.0, 131.5, 130.2, 129.4, 127.7, 126.2, 124.9, 124.5 (q,  $J = 286.8$  Hz), 121.6, 121.4, 121.0, 119.2, 119.0, 115.4, 111.7, 111.0, 89.9, 82.9, 70.0 (q,  $J = 33.1$  Hz). HRMS (ESI) Calcd. for  $C_{25}H_{16}BrF_3N_2NaO_2^+ [M+Na^+]$ : 535.0239 ( $^{79}Br$ ), 537.0219 ( $^{81}Br$ ), Found: 535.0255 ( $^{79}Br$ ), 537.0238 ( $^{81}Br$ ).

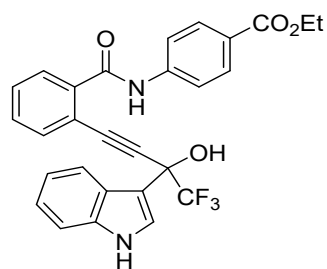

**Ethyl 4-(2-(4,4,4-trifluoro-3-hydroxy-3-(1H-indol-3-yl)but-1-yn-1-yl)benzamido)benzoate (1h)**: white solid, m.p.: 108.3-108.9 °C, 598 mg, 59% yield.  $^1H$  NMR (400 MHz, DMSO- $d_6$ )  $\delta$  11.32 (s, 1H), 10.86 (s, 1H), 7.93 (q,  $J = 8.5$  Hz, 4H), 7.76 (d,  $J = 8.0$  Hz, 1H), 7.71–7.62 (m, 3H),

7.62–7.53 (m, 3H), 7.37 (d,  $J = 8.1$  Hz, 1H), 7.07 (t,  $J = 7.5$  Hz, 1H), 6.92 (t,  $J = 7.5$  Hz, 1H), 4.28 (q,  $J = 7.0$  Hz, 2H), 1.31 (t,  $J = 7.1$  Hz, 3H).  $^{13}C$  NMR (101 MHz, DMSO- $d_6$ )  $\delta$  166.7, 165.5, 143.5, 139.7, 136.7, 133.0, 130.3, 130.2, 129.5, 127.8, 126.2, 124.9, 124.7, 124.4 (q,  $J = 287.8$  Hz), 121.4, 120.9, 119.2, 119.1, 119.0, 111.7, 111.0, 89.9, 82.8, 70.0 (q,  $J = 32.9$  Hz), 60.6, 14.3. HRMS (ESI) Calcd. for  $C_{28}H_{21}F_3N_2NaO_4^+ [M+Na^+]$ : 529.1345, Found: 529.1356.

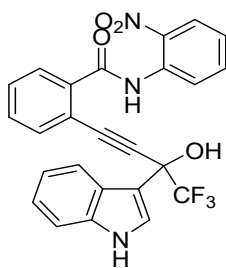

**N-(2-nitrophenyl)-2-(4,4,4-trifluoro-3-hydroxy-3-(1H-indol-3-yl)but-1-yn-1-yl)benzamide (1i):** yellow solid, m.p.: 185.3-187.0 °C, 240 mg, 25% yield. <sup>1</sup>H NMR (400 MHz, DMSO-d<sub>6</sub>) δ 11.30 (s, 1H), 10.83 (s, 1H), 8.04 (d, *J* = 8.2 Hz, 1H), 7.83–7.74 (m, 2H), 7.72 (d, *J* = 7.3 Hz, 3H), 7.66–7.54 (m, 4H), 7.46–7.32 (m, 2H), 7.08 (t, *J* = 7.5 Hz, 1H), 6.93 (t, *J* = 7.5 Hz, 1H). <sup>13</sup>C NMR (101 MHz, DMSO-d<sub>6</sub>) δ 165.8, 142.3, 138.2, 136.7, 134.2, 133.6, 131.3, 130.9, 129.6, 127.9, 126.0, 125.7, 125.6, 125.1, 124.9, 124.5 (q, *J* = 286.8 Hz), 121.4, 120.9, 119.2, 119.2, 111.7, 110.9, 90.3, 82.9, 70.0 (q, *J* = 32.3 Hz). HRMS (ESI) Calcd. for C<sub>25</sub>H<sub>17</sub>F<sub>3</sub>N<sub>3</sub>O<sub>4</sub><sup>+</sup> [M+H<sup>+</sup>]: 480.1166, Found: 480.1166.

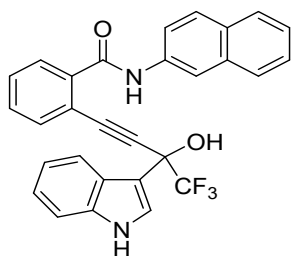

**N-(naphthalen-2-yl)-2-(4,4,4-trifluoro-3-hydroxy-3-(1H-indol-3-yl)but-1-yn-1-yl)benzamide (1j):** white solid, m.p.: 221.7-222.4 °C, 417 mg, 43% yield. <sup>1</sup>H NMR (400 MHz, DMSO-d<sub>6</sub>) δ 11.36 (s, 1H), 10.73 (s, 1H), 8.50 (s, 1H), 7.86 (dd, *J* = 14.5, 7.9 Hz, 3H), 7.79 (dd, *J* = 13.9, 8.6 Hz, 2H), 7.74–7.65 (m, 3H), 7.59 (dd, *J* = 9.3, 5.2 Hz, 3H), 7.48 (t, *J* = 7.5 Hz, 1H), 7.44–7.33 (m, 2H), 7.06 (t, *J* = 7.6 Hz, 1H), 6.92 (t, *J* = 7.5 Hz, 1H). <sup>13</sup>C NMR (101 MHz, DMSO-d<sub>6</sub>) δ 166.5, 140.1, 136.8, 136.7, 133.4, 133.1, 130.2, 130.1, 128.3, 127.9, 127.6, 127.6, 126.5, 126.3, 125.0, 124.9, 124.5 (q, *J* = 287.8 Hz), 121.4, 121.0, 120.6, 119.3, 119.1, 116.1, 111.7, 111.1, 89.9, 83.1, 70.05 (q, *J* = 32.7 Hz). HRMS (ESI) Calcd. for C<sub>29</sub>H<sub>19</sub>F<sub>3</sub>N<sub>2</sub>NaO<sub>2</sub><sup>+</sup> [M+Na<sup>+</sup>]: 507.1291, Found: 507.1293.

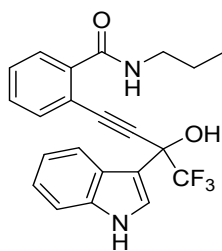

**N-propyl-2-(4,4,4-trifluoro-3-hydroxy-3-(1H-indol-3-yl)but-1-yn-1-yl)benzamide (1k):** yellow solid, m.p.: 90.2-91.5 °C, 264 mg, 33% yield. <sup>1</sup>H NMR (400 MHz, DMSO-d<sub>6</sub>) δ 11.39 (s, 1H), 8.38 (s, 1H), 7.82 (d, *J* = 7.9 Hz, 1H), 7.75 (s, 1H), 7.57 (d, *J* = 7.6 Hz, 2H), 7.50 (s, 3H), 7.40 (d, *J* = 8.1 Hz, 1H), 7.11 (t, *J* = 7.5 Hz, 1H), 7.02 (t, *J* = 7.4 Hz, 1H), 3.28–3.04 (m, 2H), 1.57–1.39 (m, 2H), 0.86 (t, *J* = 7.4

Hz, 3H).  $^{13}\text{C}$  NMR (101 MHz, DMSO- $d_6$ )  $\delta$  167.4, 140.3, 136.8, 133.0, 129.6, 129.2, 127.6, 126.6, 125.0, 124.6 (q,  $J = 287.8$  Hz), 121.4, 121.0, 119.2, 118.8, 111.7, 111.2, 89.5, 83.2, 70.1 (q,  $J = 33.3$  Hz), 41.0, 22.2, 11.5. HRMS (ESI) Calcd. for  $\text{C}_{22}\text{H}_{20}\text{F}_3\text{N}_2\text{O}_2^+$  [ $\text{M}+\text{H}^+$ ]: 401.1472, Found:401.1483.

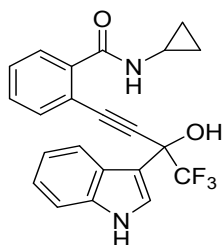

**N-cyclopropyl-2-(4,4,4-trifluoro-3-hydroxy-3-(1H-indol-3-yl)**

**but-1-yn-1-yl)benzamide (1l):** white solid, m.p.: 99.7-101.1 °C,

359 mg, 45% yield.  $^1\text{H}$  NMR (400 MHz, DMSO- $d_6$ )  $\delta$  11.39 (s, 1H), 8.48 (s, 1H), 7.82 (d,  $J = 7.9$  Hz, 1H), 7.77 (s, 1H), 7.58 (s,

2H), 7.48 (s, 3H), 7.40 (d,  $J = 8.1$  Hz, 1H), 7.12 (t,  $J = 7.5$  Hz, 1H), 7.03 (t,  $J = 7.5$  Hz, 1H), 2.82 (d,  $J = 3.1$  Hz, 1H), 0.66 (d,  $J = 6.4$  Hz, 2H), 0.52 (s, 2H).  $^{13}\text{C}$  NMR (101 MHz, DMSO- $d_6$ )  $\delta$  168.7, 140.1, 136.8, 133.0, 129.7, 129.3, 127.6, 126.6, 125.0, 124.6 (q,  $J = 286.8$  Hz), 121.4, 121.1, 119.3, 118.7, 111.8, 111.2, 89.5, 83.2, 70.1 (q,  $J = 33.3$  Hz), 23.0, 5.8, 5.6. HRMS (ESI) Calcd. for  $\text{C}_{22}\text{H}_{18}\text{F}_3\text{N}_2\text{O}_2^+$  [ $\text{M}+\text{H}^+$ ]: 399.1315, Found: 399.1306.

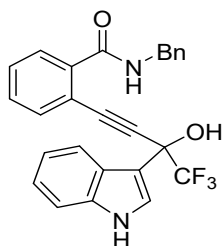

**N-benzyl-2-(4,4,4-trifluoro-3-hydroxy-3-(1H-indol-3-yl)but-1-**

**yn-1-yl)benzamide (1m):** yellow solid, m.p.: 92.8-93.8 °C, 323

mg, 36% yield.  $^1\text{H}$  NMR (400 MHz, DMSO- $d_6$ )  $\delta$  11.39 (s, 1H),

8.97 (t,  $J = 5.3$  Hz, 1H), 7.84 (d,  $J = 7.9$  Hz, 1H), 7.78 (s, 1H),

7.61 (s, 2H), 7.54 (d,  $J = 9.9$  Hz, 3H), 7.40 (d,  $J = 8.1$  Hz, 1H),

7.35 (d,  $J = 7.3$  Hz, 2H), 7.28 (t,  $J = 7.2$  Hz, 2H), 7.24–7.17 (m, 1H), 7.12 (t,  $J = 7.4$  Hz, 1H), 7.03 (t,  $J = 7.4$  Hz, 1H), 4.51 (dd,  $J = 15.1, 6.0$  Hz, 1H), 4.40 (dd,  $J = 15.1, 5.5$  Hz, 1H).  $^{13}\text{C}$  NMR (101 MHz, DMSO- $d_6$ )  $\delta$  167.6, 139.8, 139.2, 136.8, 133.2, 129.9, 129.3, 128.4, 127.7, 127.3, 126.9, 126.6, 125.1, 124.6 (q,  $J = 286.8$  Hz), 121.4, 121.1, 119.3, 119.0, 111.8, 111.2, 89.6, 83.3, 70.2 (q,  $J = 32.8$  Hz), 42.7. HRMS (ESI) Calcd. for  $\text{C}_{26}\text{H}_{20}\text{F}_3\text{N}_2\text{O}_2^+$  [ $\text{M}+\text{H}^+$ ]: 449.1472, Found: 449.1493.

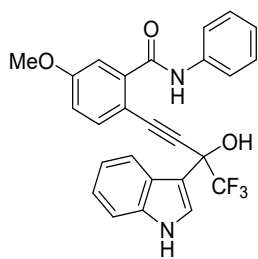

**5-Methoxy-N-phenyl-2-(4,4,4-trifluoro-3-hydroxy-3-(1H-indol-3-yl)but-1-yn-1-yl)benzamide (1n):**

white solid, m.p.: 154.9-155.9 °C, 631 mg, 68% yield. <sup>1</sup>H NMR (400 MHz, DMSO-d<sub>6</sub>) δ 11.29 (s, 1H), 10.46 (s, 1H), 7.77 (d, *J* = 7.7 Hz, 3H), 7.66 (s, 1H), 7.57 (d, *J* = 8.5 Hz, 1H), 7.50 (s, 1H), 7.34 (dd, *J* = 17.0, 8.2 Hz, 3H), 7.20 (s, 1H), 7.16–7.01 (m, 3H), 6.91 (t, *J* = 7.5 Hz, 1H), 3.86 (s, 3H). <sup>13</sup>C NMR (101 MHz, DMSO-d<sub>6</sub>) δ 165.9, 159.6, 141.6, 139.2, 136.7, 134.8, 128.7, 126.3, 125.0, 124.6 (q, *J* = 286.8 Hz), 123.8, 121.4, 121.1, 119.9, 119.2, 115.9, 113.3, 111.7, 111.3, 111.0, 88.2, 83.1, 70.03 (q, *J* = 32.8 Hz), 55.8. HRMS (ESI) Calcd. for C<sub>26</sub>H<sub>20</sub>F<sub>3</sub>N<sub>2</sub>O<sub>3</sub><sup>+</sup> [M+H<sup>+</sup>]: 465.1421, Found: 465.1413.

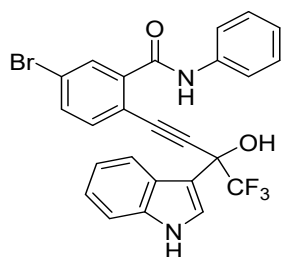

**5-Bromo-N-phenyl-2-(4,4,4-trifluoro-3-hydroxy-3-(1H-indol-3-yl)but-1-yn-1-yl)benzamide (1o):**

white solid, m.p.: 170.5-171.6 °C, 544 mg, 53% yield. <sup>1</sup>H NMR (400 MHz, DMSO-d<sub>6</sub>) δ 11.33 (s, 1H), 10.57 (s, 1H), 7.89 (s, 1H), 7.76 (t, *J* = 9.3 Hz, 4H), 7.64 (d, *J* = 8.4 Hz, 2H), 7.58 (d, *J* = 8.3 Hz, 1H), 7.35 (dd, *J* = 14.8, 7.7 Hz, 3H), 7.08 (dd, *J* = 17.1, 8.1 Hz, 2H), 6.91 (t, *J* = 7.5 Hz, 1H). <sup>13</sup>C NMR (101 MHz, DMSO-d<sub>6</sub>) δ 164.6, 141.7, 138.9, 136.7, 134.9, 133.0, 130.5, 128.8, 126.2, 124.9, 124.4 (q, *J* = 286.8 Hz), 124.0, 122.6, 121.4, 121.0, 119.9, 119.3, 118.3, 111.8, 110.9, 90.8, 82.2, 70.1 (q, *J* = 32.4 Hz). HRMS (ESI) Calcd. for C<sub>25</sub>H<sub>16</sub>BrF<sub>3</sub>N<sub>2</sub>NaO<sub>2</sub><sup>+</sup> [M+Na<sup>+</sup>]: 535.0239 (<sup>79</sup>Br), 537.0219 (<sup>81</sup>Br), Found: 535.0243 (<sup>79</sup>Br), 537.0225 (<sup>81</sup>Br).

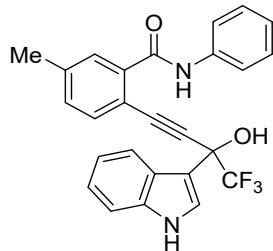

**5-Methyl-N-phenyl-2-(4,4,4-trifluoro-3-hydroxy-3-(1H-indol-3-yl)but-1-yn-1-yl)benzamide (1p):**

white solid, m.p.: 160.0-161.2 °C, 448 mg, 50% yield. <sup>1</sup>H NMR (400 MHz, DMSO-d<sub>6</sub>) δ 11.30 (s, 1H), 10.45 (s, 1H), 7.83–7.73 (m, 3H), 7.67 (d, *J* = 2.3 Hz, 1H), 7.53 (t, *J* = 3.9 Hz, 2H), 7.48 (s, 1H), 7.41–7.28 (m, 4H), 7.07 (dd, *J* = 10.8, 4.7 Hz, 2H), 6.92 (t, *J* = 7.5 Hz, 1H), 2.41 (s,



3H).  $^{13}\text{C}$  NMR (101 MHz,  $\text{DMSO-d}_6$ )  $\delta$  166.2, 140.0, 139.4, 139.2, 136.7, 133.0, 130.6, 128.7, 128.2, 126.3, 125.0, 124.5 (q,  $J = 286.8$  Hz), 123.7, 121.4, 121.0, 119.8, 119.2, 116.1, 111.7, 111.2, 89.1, 83.2, 70.0 (q,  $J = 32.8$  Hz), 21.0. HRMS (ESI) Calcd. for  $\text{C}_{26}\text{H}_{19}\text{F}_3\text{N}_2\text{NaO}_2^+$  [ $\text{M}+\text{Na}^+$ ]: 471.1291, Found: 471.1299.

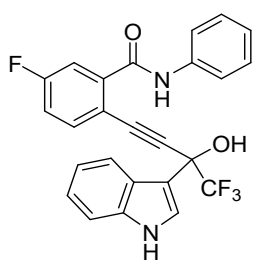

**5-Fluoro-N-phenyl-2-(4,4,4-trifluoro-3-hydroxy-3-(1H-indol-3-yl)but-1-yn-1-yl)benzamide (1q):** white solid, m.p.: 160.1-

162.0 °C, 353 mg, 39% yield.  $^1\text{H}$  NMR (400 MHz,  $\text{DMSO-d}_6$ )  $\delta$  11.33 (s, 1H), 10.56 (s, 1H), 7.76 (d,  $J = 7.2$  Hz, 3H), 7.73–7.68 (m, 1H), 7.66 (s, 1H), 7.60 (d,  $J = 8.1$  Hz, 2H), 7.44 (t,  $J = 8.5$

Hz, 1H), 7.36 (dd,  $J = 15.1, 7.8$  Hz, 3H), 7.09 (dd,  $J = 15.6, 7.9$  Hz, 2H), 6.92 (t,  $J = 7.5$  Hz, 1H).  $^{13}\text{C}$  NMR (101 MHz,  $\text{DMSO-d}_6$ )  $\delta$  164.7, 161.8 (d,  $J = 250.0$  Hz), 142.3 (d,  $J = 7.4$  Hz), 138.9, 136.7, 135.5 (d,  $J = 8.6$  Hz), 128.7, 126.2, 124.9, 124.4 (q,  $J = 286.8$  Hz), 123.9, 121.4, 121.0, 119.9, 119.2, 117.3 (d,  $J = 22.2$  Hz), 115.5 (d,  $J = 3.3$  Hz), 115.2 (d,  $J = 23.7$  Hz), 111.7, 111.0, 89.5, 82.0, 70.0 (q,  $J = 32.3$  Hz). HRMS (ESI) Calcd. for  $\text{C}_{25}\text{H}_{17}\text{F}_4\text{N}_2\text{O}_2^+$  [ $\text{M}+\text{H}^+$ ]: 453.1221, Found: 453.1219.

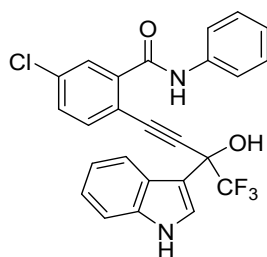

**5-Chloro-N-phenyl-2-(4,4,4-trifluoro-3-hydroxy-3-(1H-indol-3-yl)but-1-yn-1-yl)benzamide (1r):** white solid, m.p.:

166.3-168.0 °C, 571 mg, 61% yield.  $^1\text{H}$  NMR (400 MHz,  $\text{DMSO-d}_6$ )  $\delta$  11.33 (s, 1H), 10.57 (s, 1H), 7.75 (d,  $J = 8.2$  Hz, 4H), 7.65 (t,  $J = 10.5$  Hz, 4H), 7.36 (dd,  $J = 15.3, 7.9$  Hz, 3H),

7.09 (dd,  $J = 17.2, 7.8$  Hz, 2H), 6.91 (t,  $J = 7.5$  Hz, 1H).  $^{13}\text{C}$  NMR (101 MHz,  $\text{DMSO-d}_6$ )  $\delta$  164.6, 141.6, 138.9, 136.7, 134.8, 134.0, 130.1, 128.8, 127.7, 126.2, 124.9, 124.4 (q,  $J = 287.8$  Hz), 124.0, 121.4, 121.0, 119.9, 119.3, 118.0, 111.7, 110.9, 90.7, 82.1, 70.0 (q,  $J = 33.0$  Hz). HRMS (ESI) Calcd. for  $\text{C}_{25}\text{H}_{16}\text{ClF}_3\text{N}_2\text{NaO}_2^+$  [ $\text{M}+\text{Na}^+$ ]: 491.0745 ( $^{35}\text{Cl}$ ), 493.0715 ( $^{37}\text{Cl}$ ), Found: 491.0756 ( $^{35}\text{Cl}$ ), 493.0736 ( $^{37}\text{Cl}$ ).

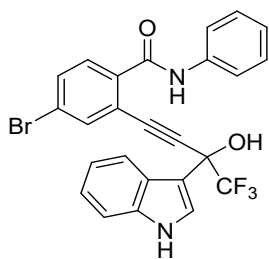

**4-Bromo-N-phenyl-2-(4,4,4-trifluoro-3-hydroxy-3-(1H-**

**indol-3-yl)but-1-yn-1-yl)benzamide (1s):** white solid, m.p.:

115.1-116.1 °C, 359 mg, 35% yield. <sup>1</sup>H NMR (400 MHz,

DMSO-d<sub>6</sub>) δ 11.33 (s, 1H), 10.53 (s, 1H), 7.86–7.71 (m, 5H),

7.66 (d, *J* = 2.3 Hz, 1H), 7.62 (d, *J* = 8.9 Hz, 2H), 7.35 (dd, *J* =

16.7, 8.2 Hz, 3H), 7.08 (dd, *J* = 14.9, 7.5 Hz, 2H), 6.91 (t, *J* = 7.5 Hz, 1H). <sup>13</sup>C NMR

(101 MHz, DMSO-d<sub>6</sub>) δ 165.1, 139.0, 138.9, 136.7, 135.0, 132.3, 129.8, 128.7, 126.2,

124.8, 124.3 (q, *J* = 287.8 Hz), 123.9, 122.8, 121.4, 121.2, 120.9, 119.8, 119.2, 111.7,

110.7, 91.0, 81.6, 70.0 (q, *J* = 33.3 Hz). HRMS (ESI) Calcd. for C<sub>25</sub>H<sub>16</sub>BrF<sub>3</sub>N<sub>2</sub>NaO<sub>2</sub><sup>+</sup>

[M+Na<sup>+</sup>]: 535.0239 (<sup>79</sup>Br), 537.0219 (<sup>81</sup>Br), Found: 535.0261 (<sup>79</sup>Br), 537.0243 (<sup>81</sup>Br).

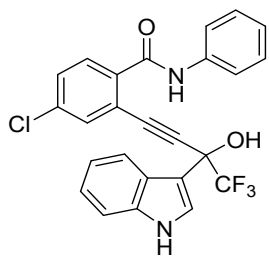

**4-Chloro-N-phenyl-2-(4,4,4-trifluoro-3-hydroxy-3-(1H-**

**indol-3-yl)but-1-yn-1-yl)benzamide (1t):** white solid, m.p.:

166.9-167.5 °C, 337 mg, 36% yield. <sup>1</sup>H NMR (400 MHz,

DMSO-d<sub>6</sub>) δ 11.33 (s, 1H), 10.54 (s, 1H), 7.81–7.73 (m, 3H),

7.72–7.61 (m, 5H), 7.36 (dd, *J* = 18.0, 8.2 Hz, 3H), 7.09 (dd, *J* =

14.3, 7.2 Hz, 2H), 6.92 (t, *J* = 7.5 Hz, 1H). <sup>13</sup>C NMR (101 MHz, DMSO-d<sub>6</sub>) δ 165.1,

139.0, 138.7, 136.7, 134.5, 132.3, 129.7, 129.5, 128.8, 126.2, 124.9, 124.4 (q, *J* =

286.8 Hz), 123.9, 121.4, 121.1, 120.9, 119.9, 119.3, 111.7, 110.8, 91.0, 81.7, 70.0 (q,

*J* = 32.9 Hz). HRMS (ESI) Calcd. for C<sub>25</sub>H<sub>16</sub>ClF<sub>3</sub>N<sub>2</sub>NaO<sub>2</sub><sup>+</sup> [M+Na<sup>+</sup>]: 491.0745 (<sup>35</sup>Cl),

493.0715 (<sup>37</sup>Cl), Found: 491.0763 (<sup>35</sup>Cl), 493.0745 (<sup>37</sup>Cl).

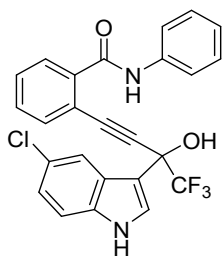

**2-(3-(5-Chloro-1H-indol-3-yl)-4,4,4-trifluoro-3-hydroxybut-1-**

**yn-1-yl)-N-phenylbenzamide (1u):** white solid, m.p.: 139.0-

140.3 °C, 281 mg, 30% yield. <sup>1</sup>H NMR (400 MHz, DMSO-d<sub>6</sub>) δ

11.59 (s, 1H), 10.52 (s, 1H), 7.84 –7.72 (m, 5H), 7.68 (d, *J* = 4.8

Hz, 2H), 7.62–7.54 (m, 2H), 7.42 (d, *J* = 8.7 Hz, 1H), 7.33 (t, *J* =

7.7 Hz, 2H), 7.17–7.03 (m, 2H). <sup>13</sup>C NMR (101 MHz, DMSO-d<sub>6</sub>) δ 166.2, 140.1,

139.2, 135.2, 133.1, 130.2, 129.6, 128.7, 128.2, 127.8, 126.0, 124.4 (q, *J* = 287.8 Hz),

124.0, 123.8, 121.6, 120.1, 119.8, 118.9, 113.5, 111.1, 89.4, 83.3, 70.0 (q,  $J = 33.0$  Hz). HRMS (ESI) Calcd. for  $C_{25}H_{16}ClF_3N_2NaO_2^+$  [ $M+Na^+$ ]: 491.0745 ( $^{35}Cl$ ), 493.0715 ( $^{37}Cl$ ), Found: 491.0762 ( $^{35}Cl$ ), 493.0743 ( $^{37}Cl$ ).

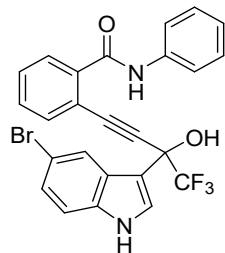

**2-(3-(5-Bromo-1H-indol-3-yl)-4,4,4-trifluoro-3-hydroxybut-1-yn-1-yl)-N-phenylbenzamide (1v):** white solid, m.p.: 139.1-140.3 °C, 462 mg, 45% yield.  $^1H$  NMR (400 MHz, DMSO- $d_6$ )  $\delta$  11.61 (s, 1H), 10.52 (s, 1H), 7.92 (s, 1H), 7.84–7.73 (m, 4H), 7.68 (d,  $J = 4.1$  Hz, 2H), 7.63–7.52 (m, 2H), 7.38 (d,  $J = 8.7$  Hz, 1H), 7.33 (t,  $J = 7.7$  Hz, 2H), 7.24 (d,  $J = 8.7$  Hz, 1H), 7.08 (t,  $J = 7.3$  Hz, 1H).  $^{13}C$  NMR (101 MHz, DMSO- $d_6$ )  $\delta$  166.2, 140.1, 139.2, 135.5, 133.1, 130.2, 129.6, 128.8, 128.1, 127.8, 126.7, 124.4 (q,  $J = 286.8$  Hz), 124.1, 123.8, 123.1, 119.9, 118.9, 114.0, 112.1, 111.0, 89.4, 83.3, 70.0 (q,  $J = 33.1$  Hz). HRMS (ESI) Calcd. for  $C_{25}H_{16}BrF_3N_2NaO_2^+$  [ $M+Na^+$ ]: 535.0239 ( $^{79}Br$ ), 537.0219 ( $^{81}Br$ ), Found: 535.0261 ( $^{79}Br$ ), 537.0243 ( $^{81}Br$ ).

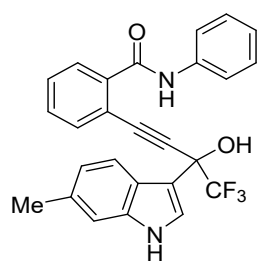

**N-phenyl-2-(4,4,4-trifluoro-3-hydroxy-3-(6-methyl-1H-indol-3-yl)but-1-yn-1-yl)benzamide(1w):** white solid, m.p.: 109.4- 110.5 °C, 538 mg, 60% yield.  $^1H$  NMR (400 MHz, DMSO- $d_6$ )  $\delta$  11.15 (s, 1H), 10.49 (s, 1H), 7.77 (d,  $J = 8.0$  Hz, 2H), 7.65 (d,  $J = 7.9$  Hz, 3H), 7.57 (s, 4H), 7.34 (t,  $J = 7.6$  Hz, 2H), 7.16 (s, 1H), 7.09 (t,  $J = 7.3$  Hz, 1H), 6.73 (d,  $J = 8.3$  Hz, 1H), 2.34 (s, 3H).  $^{13}C$  NMR (101 MHz, DMSO- $d_6$ )  $\delta$  166.3, 140.1, 139.3, 137.2, 133.2, 130.6, 130.2, 129.5, 128.8, 127.8, 125.6, 124.6 (q,  $J = 287.8$  Hz), 123.9, 123.0, 121.2, 120.8, 120.0, 119.1, 111.5, 111.0, 89.9, 83.1, 70.1 (q,  $J = 33.3$  Hz), 21.4. HRMS (ESI) Calcd. for  $C_{26}H_{19}F_3N_2NaO_2^+$  [ $M+Na^+$ ]: 471.1291, Found: 471.1299.

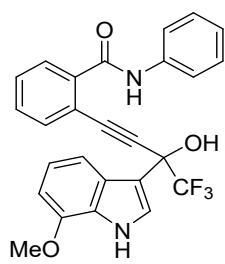

**N-phenyl-2-(4,4,4-trifluoro-3-hydroxy-3-(7-methoxy-1H-indol-3-yl)but-1-yn-1-yl)benzamide (1x):** white solid, m.p.: 55.1-156.2 °C, 566 mg, 61% yield.  $^1\text{H}$  NMR (400 MHz, DMSO- $d_6$ )  $\delta$  11.46 (s, 1H), 10.50 (s, 1H), 7.78 (d,  $J$  = 8.0 Hz, 2H), 7.64 (d,  $J$  = 6.2 Hz, 2H), 7.61–7.51 (m, 4H), 7.39 (d,  $J$  = 8.1 Hz, 1H), 7.33 (t,  $J$  = 7.7 Hz, 2H), 7.08 (t,  $J$  = 7.3 Hz, 1H), 6.84 (t,  $J$  = 7.9 Hz, 1H), 6.63 (d,  $J$  = 7.7 Hz, 1H), 3.89 (s, 3H).  $^{13}\text{C}$  NMR (101 MHz, DMSO- $d_6$ )  $\delta$  166.2, 146.2, 140.1, 139.2, 133.1, 130.1, 129.4, 128.8, 127.8, 126.9, 126.5, 125.8, 124.5 (q,  $J$  = 287.8 Hz), 123.8, 119.9, 119.8, 119.1, 113.8, 111.7, 101.8, 89.8, 83.1, 70.0 (q,  $J$  = 32.9 Hz), 55.3. HRMS (ESI) Calcd. for  $\text{C}_{26}\text{H}_{20}\text{F}_3\text{N}_2\text{O}_3^+$  [ $\text{M}+\text{H}^+$ ]: 465.1421, Found: 465.1410.

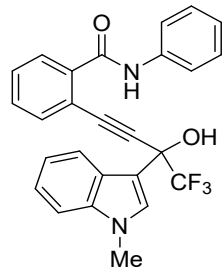

**N-phenyl-2-(4,4,4-trifluoro-3-hydroxy-3-(1-methyl-1H-indol-3-yl)but-1-yn-1-yl)benzamide (3):** yellow solid, m.p.: 90.0-90.9 °C, 350 mg, 39% yield.  $^1\text{H}$  NMR (400 MHz, DMSO- $d_6$ )  $\delta$  10.55 (s, 1H), 7.79 (d,  $J$  = 7.9 Hz, 3H), 7.65 (s, 2H), 7.62 (s, 1H), 7.58 (s, 3H), 7.42–7.28 (m, 3H), 7.19–7.05 (m, 2H), 6.97 (t,  $J$  = 7.5 Hz, 1H), 3.60 (s, 3H).  $^{13}\text{C}$  NMR (101 MHz, DMSO- $d_6$ )  $\delta$  166.3, 140.2, 139.2, 137.1, 133.1, 130.3, 130.1, 129.5, 128.7, 127.7, 125.2, 124.4 (q,  $J$  = 286.8 Hz), 123.8, 121.5, 121.2, 119.9, 119.4, 118.9, 110.2, 110.0, 89.5, 83.0, 69.9 (q,  $J$  = 33.3 Hz), 32.4. HRMS (ESI) Calcd. for  $\text{C}_{26}\text{H}_{19}\text{F}_3\text{N}_2\text{NaO}_2^+$  [ $\text{M}+\text{Na}^+$ ]: 471.1291, Found: 471.1300.

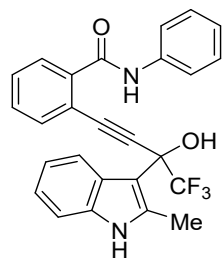

**N-phenyl-2-(4,4,4-trifluoro-3-hydroxy-3-(2-methyl-1H-indol-3-yl)but-1-yn-1-yl)benzamide (5):** white solid, m.p.: 162.7-163.6 °C, 421 mg, 47% yield.  $^1\text{H}$  NMR (400 MHz, DMSO- $d_6$ )  $\delta$  11.15 (s, 1H), 10.47 (s, 1H), 7.90 (d,  $J$  = 8.1 Hz, 1H), 7.75 (d,  $J$  = 7.9 Hz, 2H), 7.68–7.60 (m, 3H), 7.57 (d,  $J$  = 3.3 Hz, 2H), 7.33 (t,  $J$  = 7.6 Hz, 2H), 7.24 (d,  $J$  = 8.0 Hz, 1H), 7.09 (t,  $J$  = 7.3 Hz, 1H), 6.97 (t,  $J$  = 7.5 Hz, 1H), 6.83 (t,  $J$  = 7.5 Hz, 1H), 2.50 (s, 3H).  $^{13}\text{C}$  NMR (101 MHz, DMSO- $d_6$ )  $\delta$  166.1, 140.0, 139.3, 135.3, 134.7, 133.2, 130.1, 129.4, 128.7, 127.8, 127.1, 124.9 (q,  $J$  = 287.8 Hz), 123.8, 120.6, 120.4,

119.9, 119.1, 119.0, 110.5, 104.8, 89.9, 84.3, 70.5 (q,  $J = 33.3$  Hz), 13.6. HRMS (ESI) Calcd. for  $C_{26}H_{19}F_3N_2NaO_2^+ [M+Na^+]$ : 471.1291, Found: 471.1298.

### 3. Catalytic enantioselective synthesis of **2**

#### General Procedure B

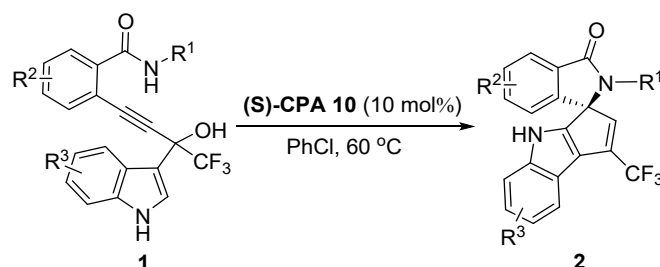

Compound **1** (0.10 mmol) and (*S*)-CPA**10** (10 mol%) were dissolved in PhCl (2.0 mL) and stirred at 60 °C. The reaction progress was monitored by TLC. Upon completion, the mixture was subjected to column chromatography on silica gel (Petroleum ether/ EtOAc = 5:1) to afford the desired product **2**.

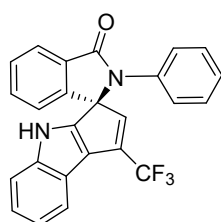

#### (*R*)-2'-phenyl-1-(trifluoromethyl)-4H-spiro[cyclopenta[b]

**indole-3,1'-isoindolin]-3'-one (2a):** white solid, m.p.: 291.5–293.0 °C, 30.3 mg, 73% yield, 88% ee, HPLC condition: Chiralpak AD-H (isopropyl alcohol/n-hexane: 30/70, 1.0 mL/min.,  $t_{\text{major}} = 9.348$  min.,  $t_{\text{minor}} = 5.190$  min.).  $[\alpha]_D^{20} = +80.7$  (c 1.0, ethyl acetate).

$^1\text{H NMR}$  (300 MHz, DMSO- $d_6$ )  $\delta$  12.03 (s, 1H), 7.97 (d,  $J = 7.4$  Hz, 1H), 7.70–7.52 (m, 2H), 7.52–7.43 (m, 1H), 7.43–7.26 (m, 5H), 7.26–7.05 (m, 3H), 6.97 (d,  $J = 7.2$  Hz, 1H), 6.91 (d,  $J = 2.2$  Hz, 1H).  $^{13}\text{C NMR}$  (75 MHz, DMSO- $d_6$ )  $\delta$  167.2, 145.4, 141.0, 140.8, 136.4, 133.7 (q,  $J = 6.0$  Hz), 133.2, 132.1 (q,  $J = 35.2$  Hz), 132.1, 129.5, 128.9, 127.1, 125.5, 124.3, 122.1, 122.0 (q,  $J = 267.7$  Hz), 121.2, 120.8, 120.3, 119.6, 118.2, 113.1, 72.1. HRMS (ESI) Calcd. for  $C_{25}H_{26}F_3N_2O^+ [M+H^+]$ : 417.1209, Found: 417.1204.

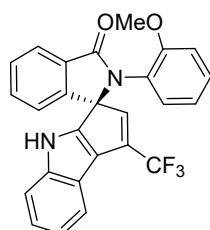

#### (*R*)-2'-(2-methoxyphenyl)-1-(trifluoromethyl)-4H-spiro

**[cyclopenta[b]indole-3,1'-isoindolin]-3'-one (2b)**: white solid, m.p.: 294.2-295.1 °C, 32.8 mg, 74% yield, 73% ee, HPLC condition: Chiralpak AD-H (isopropyl alcohol/n-hexane: 30/70, 1.0 mL/min.,  $t_{\text{major}} = 5.765$  min.,  $t_{\text{minor}} = 4.060$  min.).  $[\alpha]_{\text{D}}^{20} = +129.0$  (c 1.0, ethyl acetate).  $^1\text{H}$  NMR (400 MHz, DMSO- $d_6$ )  $\delta$  11.91 (s, 1H), 7.93 (d,  $J = 7.4$  Hz, 1H), 7.61 (dt,  $J = 22.4, 7.3$  Hz, 2H), 7.47–7.33 (m, 2H), 7.26 (t,  $J = 7.8$  Hz, 1H), 7.21–7.06 (m, 3H), 7.06–6.93 (m, 2H), 6.82 (t,  $J = 7.4$  Hz, 1H), 6.63 (s, 1H), 3.70 (s, 3H).  $^{13}\text{C}$  NMR (101 MHz, DMSO- $d_6$ )  $\delta$  167.3, 156.1, 144.6, 141.7, 140.9, 133.2 (q,  $J = 7.1$  Hz), 133.1, 132.1 (q,  $J = 35.3$  Hz), 132.0, 130.4, 130.3, 129.7, 124.3, 123.7, 122.1 (q,  $J = 270.7$  Hz), 122.0, 121.7, 120.7, 120.3, 119.5, 118.1, 115.9, 113.1, 112.5, 72.4, 55.6. HRMS (ESI) Calcd. for  $\text{C}_{26}\text{H}_{18}\text{F}_3\text{N}_2\text{O}_2^+$   $[\text{M}+\text{H}^+]$ : 447.1315, Found: 447.1318.

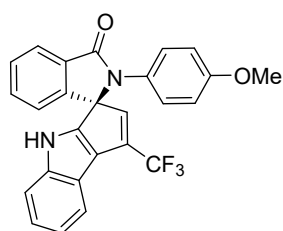

**(R)-2'-(4-methoxyphenyl)-1-(trifluoromethyl)-4H-spiro**

**[cyclopenta[b]indole-3,1'-isoindolin]-3'-one (2c)**: white solid, m.p.: 155.3-157.0 °C, 33.0 mg, 74% yield, 90% ee, HPLC condition: Chiralpak IA (isopropyl alcohol/n-hexane: 10/90, 0.8 mL/min.,  $t_{\text{major}} = 23.617$  min.,  $t_{\text{minor}} = 12.213$  min.).

$[\alpha]_{\text{D}}^{20} = +43.9$  (c 1.0, ethyl acetate).  $^1\text{H}$  NMR (400 MHz, DMSO- $d_6$ )  $\delta$  12.03 (s, 1H), 7.94 (d,  $J = 7.1$  Hz, 1H), 7.68–7.53 (m, 2H), 7.44 (dd,  $J = 6.0, 2.4$  Hz, 1H), 7.39–7.33 (m, 1H), 7.28–7.20 (m, 2H), 7.17–7.07 (m, 2H), 6.98 (d,  $J = 7.4$  Hz, 1H), 6.91–6.82 (m, 3H), 3.67 (s, 3H).  $^{13}\text{C}$  NMR (101 MHz, DMSO- $d_6$ )  $\delta$  167.4, 158.4, 145.3, 141.1, 140.8, 133.7 (q,  $J = 5.9$  Hz), 133.1, 132.2, 132.2 (q,  $J = 35.3$  Hz), 129.6, 128.5, 128.1, 124.3, 122.1 (q,  $J = 270.7$  Hz), 122.1, 121.3, 120.8, 119.7, 118.2, 115.9, 114.2, 113.2, 72.4, 55.2. HRMS (ESI) Calcd. for  $\text{C}_{26}\text{H}_{18}\text{F}_3\text{N}_2\text{O}_2^+$   $[\text{M}+\text{H}^+]$ : 447.1315, Found: 447.1325.

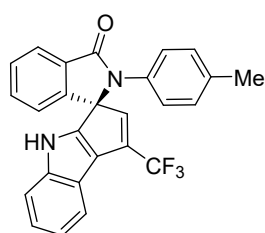

**(R)-2'-(p-tolyl)-1-(trifluoromethyl)-4H-spiro[cyclopenta[b]**

**indole-3,1'-isoindolin]-3'-one (2d)**: white solid, m.p.: 301.3-

302.4 °C, 33.6 mg, 78% yield, 89% ee, HPLCcondition: Chiralpak IA (isopropyl alcohol/n-hexane: 5/95, 0.8 mL/min.,  $t_{\text{major}} = 45.114$  min.,  $t_{\text{minor}} = 21.694$  min.).  $[\alpha]_{\text{D}}^{20} = +114.5$  (c 1.0, ethyl acetate).  $^1\text{H NMR}$  (400 MHz,  $\text{DMSO-d}_6$ )  $\delta$  12.02 (s, 1H), 7.94 (d,  $J = 7.1$  Hz, 1H), 7.68–7.53 (m, 2H), 7.50–7.41 (m, 1H), 7.35 (dt,  $J = 4.5, 2.8$  Hz, 1H), 7.25–7.18 (m, 2H), 7.17–7.06 (m, 4H), 6.97 (d,  $J = 7.4$  Hz, 1H), 6.88 (t,  $J = 2.4$  Hz, 1H), 2.20 (s, 3H).  $^{13}\text{C NMR}$  (101 MHz,  $\text{DMSO-d}_6$ )  $\delta$  167.4, 145.4, 141.1, 140.9, 137.0, 133.8 (q,  $J = 5.9$  Hz), 133.6, 133.3, 132.2, 132.2 (q,  $J = 35.3$  Hz), 129.7, 129.5, 126.1, 124.4, 122.2, 122.2 (q,  $J = 270.7$  Hz), 121.3, 120.9, 119.7, 118.3, 115.9, 113.2, 72.3, 20.6. HRMS (ESI) Calcd. for  $\text{C}_{26}\text{H}_{18}\text{F}_3\text{N}_2\text{O}^+$   $[\text{M}+\text{H}^+]$ : 431.1366, Found: 431.1362.

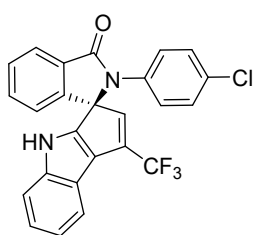

**(R)-2'-(4-chlorophenyl)-1-(trifluoromethyl)-4H-spiro**

**[cyclopenta[b]indole-3,1'-isoindolin]-3'-one (2e):** white solid, m.p.: 256.7-257.9 °C, 32.8 mg, 73% yield, 87% ee, HPLC condition: Chiralpak IA (isopropyl alcohol/n-hexane: 5/95, 0.8 mL/min.,  $t_{\text{major}} = 45.005$  min.,  $t_{\text{minor}} = 26.411$  min.).  $[\alpha]_{\text{D}}^{20} = +110.2$  (c 1.0, ethyl acetate).  $^1\text{H NMR}$  (400 MHz,  $\text{DMSO-d}_6$ )  $\delta$  12.02 (s, 1H), 7.97 (dd,  $J = 6.8, 0.7$  Hz, 1H), 7.67–7.54 (m, 2H), 7.51–7.44 (m, 1H), 7.43–7.30 (m, 5H), 7.19–7.09 (m, 2H), 6.96 (d,  $J = 7.4$  Hz, 1H), 6.90 (q,  $J = 2.2$  Hz, 1H).  $^{13}\text{C NMR}$  (101 MHz,  $\text{DMSO-d}_6$ )  $\delta$  167.4, 145.3, 141.1, 140.9, 135.4, 133.6 (q,  $J = 5.05$  Hz), 133.5, 132.5 (q,  $J = 35.9$  Hz), 131.9, 131.6, 129.8, 129.2, 127.2, 124.5, 122.3, 122.1 (q,  $J = 269.7$  Hz), 121.3, 121.0, 119.7, 118.4, 116.0, 113.3, 72.0. HRMS (ESI) Calcd. for  $\text{C}_{25}\text{H}_{15}\text{ClF}_3\text{N}_2\text{O}^+$   $[\text{M}+\text{H}^+]$ : 451.0820 ( $^{35}\text{Cl}$ ), 453.0790 ( $^{37}\text{Cl}$ ), Found: 451.0825 ( $^{35}\text{Cl}$ ), 453.0801 ( $^{37}\text{Cl}$ ).

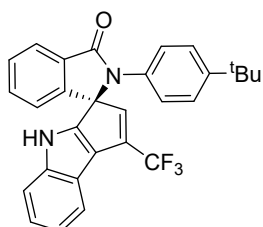

**(R)-2'-(4-(tert-butyl)phenyl)-1-(trifluoromethyl)-4H-spiro**

**[cyclopenta[b]indole-3,1'-isoindolin]-3'-one (2f):** white solid, m.p.: 270.2-272.1 °C, 26.9 mg, 57% yield, 90% ee, HPLC

condition: Chiralpak IA (isopropyl alcohol/n-hexane: 5/95, 0.8 mL/min.,  $t_{\text{major}} = 12.502$  min.,  $t_{\text{minor}} = 8.663$  min.).  $[\alpha]_{\text{D}}^{20} = +93.5$  (c 1.0, ethyl acetate).  $^1\text{H}$  NMR (400 MHz, DMSO- $d_6$ )  $\delta$  12.03 (s, 1H), 7.94 (d,  $J = 7.4$  Hz, 1H), 7.59 (dt,  $J = 22.5, 7.3$  Hz, 2H), 7.48 (d,  $J = 5.8$  Hz, 1H), 7.41–7.30 (m, 3H), 7.28 (d,  $J = 8.2$  Hz, 2H), 7.13 (d,  $J = 4.3$  Hz, 2H), 6.96–6.85 (m, 2H), 1.19 (s, 9H).  $^{13}\text{C}$  NMR (101 MHz, DMSO- $d_6$ )  $\delta$  167.5, 149.6, 145.6, 141.2, 141.0, 133.9 (q,  $J = 5.0$  Hz), 133.9, 133.3, 132.2, 132.1 (q,  $J = 36.4$  Hz), 129.7, 125.9, 125.0, 124.4, 122.3, 122.2 (q,  $J = 269.7$  Hz), 121.2, 121.0, 119.8, 118.4, 115.9, 113.3, 72.2, 34.4, 31.1. HRMS (ESI) Calcd. for  $\text{C}_{29}\text{H}_{24}\text{F}_3\text{N}_2\text{O}^+$   $[\text{M}+\text{H}^+]$ : 473.1835, Found: 473.1845.

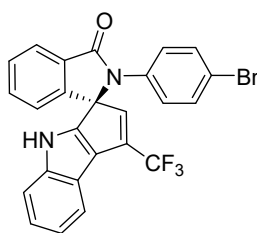

**(R)-2'-(4-bromophenyl)-1-(trifluoromethyl)-4H-spiro**

**[cyclopenta[b]indole-3,1'-isoindolin]-3'-one (2g):** yellow solid,

m.p.: 266.6–268.0 °C, 33.3 mg, 67% yield, 90% ee, HPLC

condition: Chiralpak IA (isopropyl alcohol/n-hexane: 15/85, 1.0

mL/min.,  $t_{\text{major}} = 12.565$  min.,  $t_{\text{minor}} = 9.316$  min.).  $[\alpha]_{\text{D}}^{20} =$

+109.2 (c 1.0, ethyl acetate).  $^1\text{H}$  NMR (400 MHz, DMSO- $d_6$ )  $\delta$  12.02 (s, 1H), 7.97 (d,

$J = 7.1$  Hz, 1H), 7.67–7.55 (m, 2H), 7.55–7.47 (m, 3H), 7.41–7.35 (m, 1H), 7.34–7.27

(m, 2H), 7.19–7.10 (m, 2H), 6.96 (d,  $J = 7.5$  Hz, 1H), 6.91 (t,  $J = 2.3$  Hz, 1H).  $^{13}\text{C}$

NMR (101 MHz, DMSO- $d_6$ )  $\delta$  167.3, 145.3, 141.0, 140.9, 135.8, 133.5 (q,  $J = 5.7$

Hz), 133.5, 132.4 (q,  $J = 36.0$  Hz), 132.0, 131.8, 129.7, 127.3, 124.5, 122.3, 122.1 (q,

$J = 270.7$  Hz), 121.3, 121.0, 119.9, 119.7, 118.3, 116.0, 113.2, 71.9. HRMS (ESI)

Calcd. for  $\text{C}_{25}\text{H}_{15}\text{BrF}_3\text{N}_2\text{O}^+$   $[\text{M}+\text{H}^+]$ : 495.0314 ( $^{79}\text{Br}$ ), 497.0294 ( $^{81}\text{Br}$ ), Found:

495.0312 ( $^{79}\text{Br}$ ), 497.0296 ( $^{81}\text{Br}$ ).

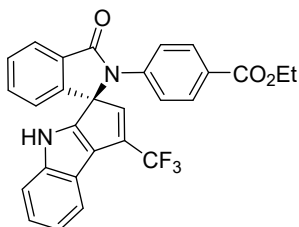

**Ethyl-(R)-4-(3'-oxo-1-(trifluoromethyl)-4H-spiro**

**[cyclopenta[b]indole-3,1'-isoindolin]-2'-yl)benzoate (2h):**

white solid, m.p.: 242.3–243.7 °C, 36.3 mg, 74% yield, 85%



ee, HPLC condition: Chiralpak AD-H (isopropyl alcohol/n-hexane: 20/80, 1.0 mL/min.,  $t_{\text{major}} = 7.584$  min.,  $t_{\text{minor}} = 5.649$  min.).  $[\alpha]_{\text{D}}^{20} = +114.2$  (c 1.0, ethyl acetate).  $^1\text{H}$  NMR (400 MHz, DMSO- $d_6$ )  $\delta$  11.99 (s, 1H), 7.98 (d,  $J = 7.3$  Hz, 1H), 7.88 (d,  $J = 8.3$  Hz, 2H), 7.69–7.56 (m, 2H), 7.52 (d,  $J = 8.1$  Hz, 3H), 7.40–7.30 (m, 1H), 7.19–7.10 (m, 2H), 6.98–6.85 (m, 2H), 4.22 (q,  $J = 7.1$  Hz, 2H), 1.24 (t,  $J = 7.0$  Hz, 3H).  $^{13}\text{C}$  NMR (101 MHz, DMSO- $d_6$ )  $\delta$  167.5, 165.1, 145.6, 141.3, 141.1, 141.0, 133.9, 133.8 (q,  $J = 6.1$  Hz), 132.4 (q,  $J = 36.1$  Hz), 131.7, 130.1, 129.9, 127.6, 124.7, 123.4, 122.5, 122.2 (q,  $J = 270.7$  Hz), 121.2, 121.1, 119.8, 118.5, 116.0, 113.3, 71.9, 60.9, 14.2. HRMS (ESI) Calcd. for  $\text{C}_{28}\text{H}_{20}\text{F}_3\text{N}_2\text{O}_3^+$   $[\text{M}+\text{H}^+]$ : 489.1421, Found: 489.1428.

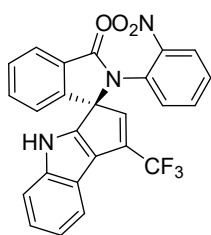

**(R)-2'-(2-nitrophenyl)-1-(trifluoromethyl)-4H-spiro[cyclopenta**

**[b]indole-3,1'-isoindolin]-3'-one (2i):** white solid, m.p.: 170.9–

172.0 °C, 21.8 mg, 47% yield, 69% ee, HPLC condition: Chiralpak

AS-H (isopropyl alcohol/n-hexane: 10/90, 1.0 mL/min.,  $t_{\text{major}} =$

13.613 min.,  $t_{\text{minor}} = 32.161$  min.).  $[\alpha]_{\text{D}}^{20} = +28.3$  (c 1.0, ethyl

acetate).  $^1\text{H}$  NMR (400 MHz, DMSO- $d_6$ )  $\delta$  12.01 (s, 1H), 8.06 (d,  $J = 8.0$  Hz, 1H),

7.97 (d,  $J = 7.0$  Hz, 1H), 7.74–7.60 (m, 3H), 7.56 (t,  $J = 7.7$  Hz, 1H), 7.47 (dd,  $J =$

14.8, 7.6 Hz, 2H), 7.24–7.08 (m, 3H), 7.04 (d,  $J = 6.9$  Hz, 1H), 6.63 (s, 1H).  $^{13}\text{C}$  NMR

(101 MHz, DMSO- $d_6$ )  $\delta$  167.3, 146.1, 144.3, 141.5, 141.2, 134.5, 134.1, 133.5 (q,  $J =$

35.3 Hz), 131.6 (q,  $J = 8.1$  Hz), 130.8, 130.0, 129.5, 128.5, 128.0, 125.8, 124.7, 122.5,

121.8 (q,  $J = 269.7$  Hz), 121.7, 121.1, 119.5, 118.4, 116.4, 113.6, 72.0. HRMS (ESI)

Calcd. for  $\text{C}_{25}\text{H}_{15}\text{F}_3\text{N}_3\text{O}_3^+$   $[\text{M}+\text{H}^+]$ : 462.1060, Found: 462.1068.

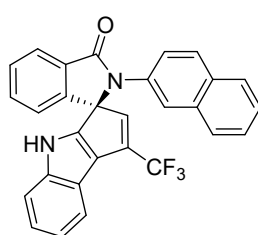

**(R)-2'-(naphthalen-2-yl)-1-(trifluoromethyl)-4H-spiro**

**[cyclopenta[b]indole-3,1'-isoindolin]-3'-one (2j):** white solid,

m.p.: 147.0–148.2 °C, 24.3 mg, 52% yield, 93% ee, HPLC

condition: Chiralpak IA (isopropyl alcohol/n-hexane: 15/85, 1.0

mL/min.,  $t_{\text{major}} = 11.643$  min.,  $t_{\text{minor}} = 9.290$  min.).  $[\alpha]_{\text{D}}^{20} =$

+130.5 (c 1.0, ethyl acetate). <sup>1</sup>H NMR (400 MHz, DMSO-d<sub>6</sub>) δ 12.06 (s, 1H), 7.99 (d, *J* = 7.4 Hz, 1H), 7.85 (d, *J* = 8.4 Hz, 3H), 7.75–7.55 (m, 3H), 7.54–7.39 (m, 4H), 7.36 (d, *J* = 7.4 Hz, 1H), 7.17–7.04 (m, 2H), 6.99 (d, *J* = 8.6 Hz, 2H). <sup>13</sup>C NMR (101 MHz, DMSO-d<sub>6</sub>) δ 167.7, 145.5, 141.2, 141.0, 134.1, 134.0 (q, *J* = 6.1 Hz), 133.6, 132.9, 132.5 (q, *J* = 35.7 Hz), 132.2, 131.8, 129.9, 128.8, 127.8, 127.7, 126.9, 126.6, 124.6, 124.2, 123.9, 122.4, 122.2 (q, *J* = 269.7 Hz), 121.4, 121.1, 119.8, 118.4, 116.2, 113.3, 72.5. HRMS(ESI) Calcd. for C<sub>29</sub>H<sub>18</sub>F<sub>3</sub>N<sub>2</sub>O<sup>+</sup> [M+H<sup>+</sup>]: 467.1366, Found: 467.1371.

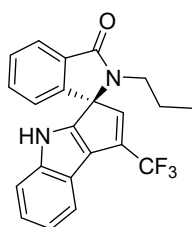

**(R)-2'-propyl-1-(trifluoromethyl)-4H-spiro[cyclopenta[b]indole-**

**3,1'-isoindolin]-3'-one (2k):** yellow oil, 6.1 mg, 16% yield, 62% ee, HPLC condition: Chiralpak IA (isopropyl alcohol/n-hexane: 10/90, 0.8mL/min., *t*<sub>major</sub> = 3.769 min., *t*<sub>minor</sub> = 5.737 min.). [α]<sub>D</sub><sup>20</sup> = +163.8 (c 1.0, ethyl acetate). <sup>1</sup>H NMR (400 MHz, DMSO-d<sub>6</sub>) δ 11.90 (s, 1H),

7.87–7.79 (m, 1H), 7.61–7.47 (m, 3H), 7.35 (dt, *J* = 7.2, 3.3 Hz, 1H), 7.20–7.12 (m, 2H), 6.94 (d, *J* = 7.5 Hz, 1H), 6.59 (dd, *J* = 2.3 Hz, 1H), 3.23–3.02 (m, 2H), 1.40–1.31 (m, 2H), 0.76 (t, *J* = 7.4 Hz, 3H). <sup>13</sup>C NMR (101 MHz, DMSO-d<sub>6</sub>) δ 167.9, 145.0, 141.1, 141.0, 133.7 (q, *J* = 6.0 Hz), 132.7, 132.5, 129.5, 123.8, 122.2, 122.2 (q, *J* = 270.7 Hz), 121.3, 121.0, 119.8, 118.3, 116.0, 113.2, 70.9, 42.5, 21.9, 11.4. HRMS (ESI) Calcd. for C<sub>22</sub>H<sub>18</sub>F<sub>3</sub>N<sub>2</sub>O<sup>+</sup> [M+H<sup>+</sup>]: 383.1366, Found: 383.1369.

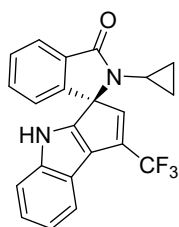

**(R)-2'-cyclopropyl-1-(trifluoromethyl)-4H-spiro[cyclopenta[b]**

**indole-3,1'-isoindolin]-3'-one (2l):** yellow solid, m.p.: 190.8–192.1 °C, 11.8 mg, 31% yield, 54% ee, HPLC condition: Chiralpak IA (isopropyl alcohol/n-hexane: 10/90, 1.0 mL/min., *t*<sub>major</sub> = 7.141 min.,

*t*<sub>minor</sub> = 13.102 min.). [α]<sub>D</sub><sup>20</sup> = +80.3 (c 1.0, ethyl acetate). <sup>1</sup>H NMR (400 MHz, DMSO-d<sub>6</sub>) δ 11.86 (s, 1H), 7.82 (d, *J* = 7.4 Hz, 1H), 7.60–7.44 (m, 3H), 7.36 (d, *J* = 5.8 Hz, 1H), 7.20–7.11 (m, 2H), 6.88 (d, *J* = 7.4 Hz, 1H), 6.68 (s, 1H), 1.22 (s, 1H), 0.75 (d, *J* = 4.5 Hz, 1H), 0.63 – 0.35 (m, 3H). <sup>13</sup>C NMR (101 MHz, DMSO-d<sub>6</sub>) δ

168.8, 146.0, 141.2, 140.8, 134.3 (q,  $J = 5.6$  Hz), 132.8, 132.6, 132.1 (q,  $J = 36.0$  Hz), 129.4, 123.8, 122.3 (q,  $J = 270.7$  Hz), 122.0, 121.1, 120.8, 119.9, 118.2, 115.8, 113.1, 71.7, 23.5, 4.5, 3.8. HRMS (ESI) Calcd. for  $C_{22}H_{16}F_3N_2O^+$   $[M+H^+]$ : 381.1209, Found: 381.1218.

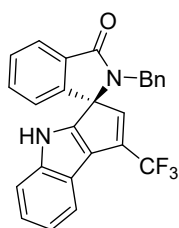

**(R)-2'-benzyl-1-(trifluoromethyl)-4H-spiro[cyclopenta[b]indole-**

**3,1'-isoindolin]-3'-one (2m):** yellow oil, 12.9 mg, 30% yield, 73% ee, HPLC condition: Chiralpak IA (isopropyl alcohol/n-hexane: 10/90, 0.8 mL/min,  $t_{\text{major}} = 7.584$  min,  $t_{\text{minor}} = 9.155$  min).  $[\alpha]_D^{20} = +62.3$  (c 1.0, ethyl acetate).  $^1\text{H}$  NMR (400 MHz, DMSO- $d_6$ )  $\delta$  11.72 (s, 1H),

7.91 (d,  $J = 7.4$  Hz, 1H), 7.63–7.45 (m, 3H), 7.31–7.25 (m, 1H), 7.17–7.10 (m, 5H), 7.09–7.02 (m, 2H), 6.93 (d,  $J = 7.5$  Hz, 1H), 6.09 (dd,  $J = 4.0, 2.1$  Hz, 1H), 4.65 (d,  $J = 15.3$  Hz, 1H), 4.06 (d,  $J = 15.4$  Hz, 1H).  $^{13}\text{C}$  NMR (101 MHz, DMSO- $d_6$ )  $\delta$  167.9, 144.3, 141.2, 141.1, 137.1, 133.0 (q,  $J = 5.9$  Hz), 132.1 (q,  $J = 35.3$  Hz), 132.9, 132.1, 129.7, 128.2, 127.9, 127.4, 124.1, 122.2, 122.1 (q,  $J = 269.7$  Hz), 121.5, 120.9, 119.8, 118.3, 116.4, 113.2, 70.8, 44.1. HRMS (ESI) Calcd. for  $C_{26}H_{18}F_3N_2O^+$   $[M+H^+]$ : 431.1366, Found: 431.1369.

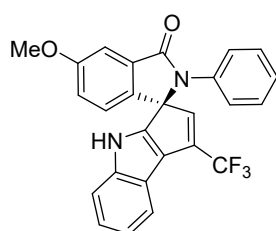

**(R)-5'-methoxy-2'-phenyl-1-(trifluoromethyl)-4H-spiro**

**[cyclopenta[b]indole-3,1'-isoindolin]-3'-one (2n):** yellow solid, m.p.: 147.7–148.4 °C, 36.5 mg, 82% yield, 77% ee, HPLC condition: Chiralpak IA (isopropyl alcohol/n-hexane: 15/85, 1.0 mL/min.,  $t_{\text{major}} = 10.174$  min.,  $t_{\text{minor}} = 8.014$  min.).

$[\alpha]_D^{20} = +68.8$  (c 1.0, ethyl acetate).  $^1\text{H}$  NMR (400 MHz, DMSO- $d_6$ )  $\delta$  12.01 (s, 1H), 7.48–7.42 (m, 2H), 7.39–7.28 (m, 5H), 7.24–7.17 (m, 1H), 7.16–7.09 (m, 3H), 6.87 (d,  $J = 8.4$  Hz, 1H), 6.86–6.83 (m, 1H), 3.87 (s, 3H).  $^{13}\text{C}$  NMR (101 MHz, DMSO- $d_6$ )  $\delta$  167.2, 160.7, 145.5, 140.9, 136.5, 133.9 (q,  $J = 5.9$  Hz), 133.6, 132.5, 132.0 (q,  $J = 35.9$  Hz), 129.0, 127.3, 125.6, 122.4, 122.1, 122.1 (q,  $J = 269.7$  Hz), 120.9, 120.9, 119.7, 118.2, 115.7, 113.2, 107.7, 71.8, 56.0. HRMS (ESI) Calcd. for  $C_{26}H_{18}F_3N_2O_2^+$

[M+H<sup>+</sup>]: 447.1315, Found: 447.1311.

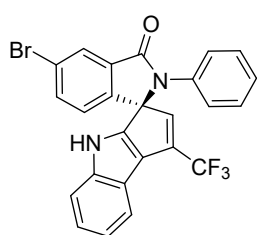

**(R)-5'-bromo-2'-phenyl-1-(trifluoromethyl)-4H-spiro**

**[cyclopenta[b]indole-3,1'-isoindolin]-3'-one (2o):** yellow solid, m.p.: 162.4-163.3 °C, 38.9 mg, 79% yield, 82% ee, HPLC condition: Chiralpak AD-H (isopropyl alcohol/n-hexane: 10/90, 1.0 mL/min.,  $t_{\text{major}} = 24.761$  min.,  $t_{\text{minor}} = 6.990$  min.).  $[\alpha]_{\text{D}}^{20} =$

+74.6 (c 1.0, ethyl acetate). <sup>1</sup>H NMR (400 MHz, DMSO-d<sub>6</sub>) δ 12.03 (s, 1H), 8.11 (s, 1H), 7.75 (d,  $J = 8.2$  Hz, 1H), 7.45 (d,  $J = 7.2$  Hz, 1H), 7.38 (d,  $J = 7.5$  Hz, 1H), 7.32 (d,  $J = 4.0$  Hz, 4H), 7.27–7.19 (m, 1H), 7.18–7.09 (m, 2H), 6.97–6.86 (m, 2H). <sup>13</sup>C NMR (101 MHz, DMSO-d<sub>6</sub>) δ 165.9, 144.8, 140.9, 140.3, 136.1, 136.0, 134.4, 133.1 (q,  $J = 6.1$  Hz), 132.5 (q,  $J = 35.8$  Hz), 129.1, 127.6, 126.9, 125.8, 123.6, 122.6, 122.3, 122.0 (q,  $J = 269.7$  Hz), 121.0 (s), 119.7, 118.3, 116.0, 113.3, 71.9. HRMS (ESI) Calcd. for C<sub>25</sub>H<sub>14</sub>BrF<sub>3</sub>N<sub>2</sub>NaO<sup>+</sup> [M+Na<sup>+</sup>]: 517.0134 (<sup>79</sup>Br), 519.0113 (<sup>81</sup>Br), Found: 517.0155 (<sup>79</sup>Br), 519.0132 (<sup>81</sup>Br).

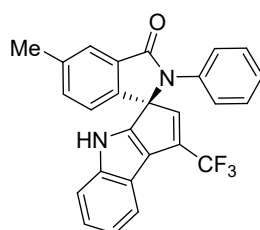

**(R)-5'-methyl-2'-phenyl-1-(trifluoromethyl)-4H-spiro**

**[cyclopenta[b]indole-3,1'-isoindolin]-3'-one (2p):** white solid, m.p.: 150.0-151.2 °C, 30.8 mg, 72% yield, 81% ee, HPLC condition: Chiralpak AS-H (isopropyl alcohol/n-hexane: 30/70, 1.0 mL/min.,  $t_{\text{major}} = 10.078$  min.,  $t_{\text{minor}} = 5.181$  min.).  $[\alpha]_{\text{D}}^{20} =$

+55.9 (c 1.0, ethyl acetate). <sup>1</sup>H NMR (400 MHz, DMSO-d<sub>6</sub>) δ 12.00 (s, 1H), 7.77 (s, 1H), 7.46 (d,  $J = 6.1$  Hz, 1H), 7.39 (d,  $J = 7.9$  Hz, 1H), 7.37–7.26 (m, 5H), 7.21 (d,  $J = 6.1$  Hz, 1H), 7.16–7.08 (m, 2H), 6.85 (d,  $J = 6.6$  Hz, 2H), 2.43 (s, 3H). <sup>13</sup>C NMR (101 MHz, DMSO-d<sub>6</sub>) δ 167.4, 145.6, 140.9, 139.6, 138.2, 136.5, 134.1, 133.9 (q,  $J = 6.0$  Hz), 132.2, 132.1 (q,  $J = 37.4$  Hz), 129.0, 127.2, 125.6, 124.5, 122.2 (q,  $J = 270.7$  Hz), 122.1, 121.0, 120.9, 119.7, 118.3, 115.8, 113.2, 72.0, 20.9. HRMS (ESI) Calcd. for C<sub>26</sub>H<sub>18</sub>F<sub>3</sub>N<sub>2</sub>O<sup>+</sup> [M+H<sup>+</sup>]: 431.1366, Found: 431.1371.

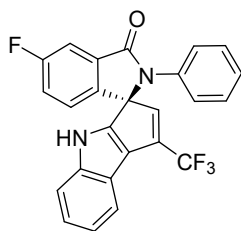

**(R)-5'-fluoro-2'-phenyl-1-(trifluoromethyl)-4H-spiro**

**[cyclopenta[b]indole-3,1'-isoindolin]-3'-one (2q):** yellow solid, m.p.: 224.2-225.7 °C, 32.4 mg, 75% yield, 83% ee, HPLC condition: Chiralpak AD-H (isopropyl alcohol/n-hexane: 10/90, 1.0 mL/min.,  $t_{\text{major}} = 10.290$  min.,  $t_{\text{minor}} = 5.540$  min.).  $[\alpha]_{\text{D}}^{20} =$

+98.3 (c 1.0, ethyl acetate).  $^1\text{H NMR}$  (400 MHz,  $\text{DMSO-d}_6$ )  $\delta$  12.03 (s, 1H), 7.79 (dd,  $J = 7.7, 2.4$  Hz, 1H), 7.50–7.35 (m, 3H), 7.35–7.28 (m, 4H), 7.22 (dt,  $J = 8.7, 4.4$  Hz, 1H), 7.18–7.09 (m, 2H), 7.03 (dd,  $J = 8.4, 4.4$  Hz, 1H), 6.90 (t,  $J = 2.4$  Hz, 1H).  $^{13}\text{C NMR}$  (101 MHz,  $\text{DMSO-d}_6$ )  $\delta$  166.27 (d,  $J = 3.4$  Hz), 163.00 (d,  $J = 246.7$  Hz), 145.0, 140.9, 136.7, 136.1, 134.4 (d,  $J = 8.8$  Hz), 133.4 (q,  $J = 5.8$  Hz), 132.4 (q,  $J = 36.0$  Hz), 129.1, 127.6, 125.9, 123.7 (d,  $J = 8.8$  Hz), 122.3, 122.1 (q,  $J = 269.7$  Hz), 121.0, 120.8 (d,  $J = 24.1$  Hz), 119.7, 118.3, 115.9 (d,  $J = 1.7$  Hz), 113.3, 111.0 (d,  $J = 23.9$  Hz), 71.8. HRMS (ESI) Calcd. for  $\text{C}_{25}\text{H}_{15}\text{F}_4\text{N}_2\text{O}^+$   $[\text{M}+\text{H}^+]$ : 435.1115, Found: 435.1123.

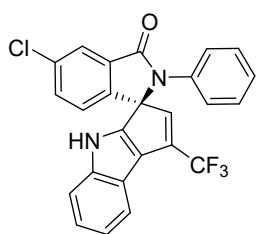

**(R)-5'-chloro-2'-phenyl-1-(trifluoromethyl)-4H-spiro**

**[cyclopenta[b]indole-3,1'-isoindolin]-3'-one (2r):** white solid, m.p.: 224.3-225.7 °C, 32.7 mg, 73% yield, 81% ee, HPLC condition: Chiralpak AD-H (isopropyl alcohol/n-hexane: 10/90, 1.0 mL/min.,  $t_{\text{major}} = 18.545$  min.,  $t_{\text{minor}} = 6.456$  min.).  $[\alpha]_{\text{D}}^{20} =$

+71.7 (c 1.0, ethyl acetate).  $^1\text{H NMR}$  (400 MHz,  $\text{DMSO-d}_6$ )  $\delta$  12.02 (s, 1H), 7.99 (s, 1H), 7.62 (d,  $J = 8.2$  Hz, 1H), 7.45 (d,  $J = 6.8$  Hz, 1H), 7.38 (d,  $J = 7.4$  Hz, 1H), 7.31 (d,  $J = 2.0$  Hz, 4H), 7.23 (d,  $J = 3.8$  Hz, 1H), 7.18–7.08 (m, 2H), 6.99 (d,  $J = 8.2$  Hz, 1H), 6.89 (s, 1H).  $^{13}\text{C NMR}$  (101 MHz,  $\text{DMSO-d}_6$ )  $\delta$  166.1, 144.9, 140.9, 139.8, 136.0, 134.5, 134.2, 133.3, 133.2 (q,  $J = 5.9$  Hz), 132.6 (q,  $J = 35.8$  Hz), 129.1, 127.7, 125.9, 124.1, 123.4, 122.1 (q,  $J = 269.7$  Hz), 122.4, 121.0, 119.7, 118.4, 116.1, 113.3, 71.9. HRMS (ESI) Calcd. for  $\text{C}_{25}\text{H}_{15}\text{ClF}_3\text{N}_2\text{O}^+$   $[\text{M}+\text{H}^+]$ : 451.0820 ( $^{35}\text{Cl}$ ), 453.0790 ( $^{37}\text{Cl}$ ), Found: 451.0824 ( $^{35}\text{Cl}$ ), 453.0800 ( $^{37}\text{Cl}$ ).

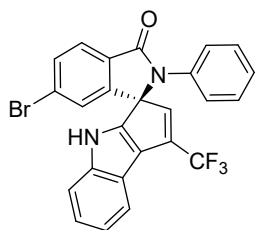

**(R)-6'-bromo-2'-phenyl-1-(trifluoromethyl)-4H-spiro**

**[cyclopenta[b]indole-3,1'-isoindolin]-3'-one (2s):** yellow solid, m.p.: 279.8-280.5 °C, 21.6 mg, 44% yield, 91% ee, HPLC condition: Chiralpak AS-H (isopropyl alcohol/n-hexane: 30/70, 1.0 mL/min.,  $t_{\text{major}} = 9.584$  min.,  $t_{\text{minor}} = 5.220$  min.).  $[\alpha]_{\text{D}}^{20} = -$

14.1 (c 1.0, ethyl acetate).  $^1\text{H}$  NMR (400 MHz, DMSO- $d_6$ )  $\delta$  12.04 (s, 1H), 7.91 (d,  $J = 8.0$  Hz, 1H), 7.84 (d,  $J = 8.2$  Hz, 1H), 7.46 (d,  $J = 7.0$  Hz, 1H), 7.39 (d,  $J = 7.6$  Hz, 1H), 7.32 (d,  $J = 13.6$  Hz, 4H), 7.22 (s, 1H), 7.19–7.07 (m, 3H), 6.90 (s, 1H).  $^{13}\text{C}$  NMR (101 MHz, DMSO- $d_6$ )  $\delta$  166.4, 144.7, 143.3, 140.9, 135.9, 133.1 (q,  $J = 6.1$  Hz), 133.0, 132.8 (q,  $J = 34.3$  Hz), 131.5, 129.1, 127.6, 126.6, 126.3, 126.0, 124.1, 122.3, 122.0 (q,  $J = 269.7$  Hz), 121.0, 119.7, 118.4, 116.2, 113.3, 71.6. HRMS (ESI) Calcd. for  $\text{C}_{25}\text{H}_{15}\text{BrF}_3\text{N}_2\text{O}^+$   $[\text{M}+\text{H}^+]$ : 495.0314 ( $^{79}\text{Br}$ ), 497.0294 ( $^{81}\text{Br}$ ), Found: 495.0318 ( $^{79}\text{Br}$ ), 497.0303 ( $^{81}\text{Br}$ ).

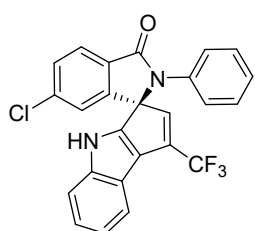

**(R)-6'-chloro-2'-phenyl-1-(trifluoromethyl)-4H-spiro**

**[cyclopenta[b]indole-3,1'-isoindolin]-3'-one (2t):** yellow solid, m.p.: 280.6-281.5 °C, 28.6 mg, 64% yield, 88% ee, HPLC condition: Chiralpak AS-H (isopropyl alcohol/n-hexane: 30/70, 1.0 mL/min.,  $t_{\text{major}} = 9.157$  min.,  $t_{\text{minor}} = 5.034$  min.).  $[\alpha]_{\text{D}}^{20} = -$

13.3(c 1.0, ethyl acetate).  $^1\text{H}$  NMR (400 MHz, DMSO- $d_6$ )  $\delta$  12.04 (s, 1H), 7.98 (d,  $J = 8.1$  Hz, 1H), 7.70 (d,  $J = 8.1$  Hz, 1H), 7.45 (d,  $J = 7.0$  Hz, 1H), 7.38 (d,  $J = 7.4$  Hz, 1H), 7.32 (d,  $J = 13.3$  Hz, 4H), 7.22 (s, 1H), 7.17–7.09 (m, 2H), 7.03 (s, 1H), 6.89 (s, 1H).  $^{13}\text{C}$  NMR (101 MHz, DMSO- $d_6$ )  $\delta$  166.3, 144.8, 143.2, 140.9, 137.9, 135.9, 133.1 (q,  $J = 6.7$  Hz), 132.5 (q,  $J = 35.6$  Hz), 131.1, 130.2, 129.1, 127.7, 126.2, 126.0, 122.3, 122.0 (q,  $J = 269.7$  Hz), 121.3, 121.0, 119.7, 118.4, 116.2, 113.3, 71.7. HRMS (ESI) Calcd. for  $\text{C}_{25}\text{H}_{15}\text{ClF}_3\text{N}_2\text{O}^+$   $[\text{M}+\text{H}^+]$ : 451.0820 ( $^{35}\text{Cl}$ ), 453.0790 ( $^{37}\text{Cl}$ ), Found: 451.0818 ( $^{35}\text{Cl}$ ), 453.0792 ( $^{37}\text{Cl}$ ).

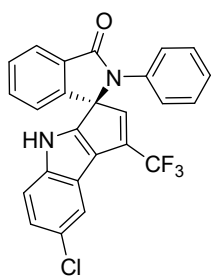

**(R)-7-chloro-2'-phenyl-1-(trifluoromethyl)-4H-**

**spiro[cyclopenta[b]indole-3,1'-isoindolin]-3'-one (2u):** white solid, m.p.: 283.0-284.1 °C, 22.3 mg, 50% yield, 91% ee, HPLC condition: Chiralpak IA (isopropyl alcohol/n-hexane: 15/85, 1.0 mL/min.,  $t_{\text{major}} = 10.817$  min.,  $t_{\text{minor}} = 6.192$  min.).  $[\alpha]_{\text{D}}^{20} = +77.7$  (c 1.0, ethyl acetate).  $^1\text{H}$  NMR (400 MHz, DMSO- $d_6$ )  $\delta$  12.31 (s, 1H), 7.97 (d,  $J = 7.3$  Hz, 1H), 7.71–7.54 (m, 2H), 7.41 (d,  $J = 9.1$  Hz, 2H), 7.32 (d,  $J = 2.6$  Hz, 4H), 7.22 (d,  $J = 3.1$  Hz, 1H), 7.16 (d,  $J = 8.7$  Hz, 1H), 7.04–6.92 (m, 2H).  $^{13}\text{C}$  NMR (101 MHz, DMSO- $d_6$ )  $\delta$  167.3, 147.3, 140.7, 139.3, 136.2, 134.4 (q,  $J = 5.9$  Hz), 133.4, 132.1, 131.7 (q,  $J = 36.0$  Hz), 129.8, 129.0, 127.4, 125.8, 125.6, 124.4, 122.1, 122.0 (q,  $J = 269.7$  Hz), 121.3, 120.4, 117.2, 115.4, 114.9, 72.2. HRMS (ESI) Calcd. for  $\text{C}_{25}\text{H}_{15}\text{ClF}_3\text{N}_2\text{O}^+$  [ $\text{M}+\text{H}^+$ ]: 451.0820 ( $^{35}\text{Cl}$ ), 453.0790 ( $^{37}\text{Cl}$ ), Found: 451.0830 ( $^{35}\text{Cl}$ ), 453.0811 ( $^{37}\text{Cl}$ ).

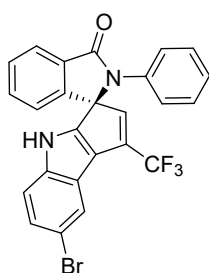

**(R)-7-bromo-2'-phenyl-1-(trifluoromethyl)-4H-**

**spiro[cyclopenta[b]indole-3,1'-isoindolin]-3'-one (2v):** white solid, m.p.: 288.4- 289.0 °C, 26.1 mg, 53% yield, 90% ee, HPLC condition: Chiralpak IA (isopropyl alcohol/n-hexane: 15/85, 1.0 mL/min.,  $t_{\text{major}} = 10.832$  min.,  $t_{\text{minor}} = 6.283$  min.).  $[\alpha]_{\text{D}}^{20} = +80.7$  (c 1.0, ethyl acetate).  $^1\text{H}$  NMR (400 MHz, DMSO- $d_6$ )  $\delta$  12.31 (s, 1H), 7.97 (dd,  $J = 6.8, 0.7$  Hz, 1H), 7.71–7.56 (m, 2H), 7.54 (d,  $J = 1.3$  Hz, 1H), 7.37 (d,  $J = 8.7$  Hz, 1H), 7.32 (t,  $J = 4.5$  Hz, 4H), 7.29–7.25 (m, 1H), 7.25–7.18 (m, 1H), 7.02–6.98 (m, 1H), 6.97 (q,  $J = 2.2$  Hz, 1H).  $^{13}\text{C}$  NMR (101 MHz, DMSO- $d_6$ )  $\delta$  167.3, 147.1, 140.6, 139.5, 136.2, 134.5 (q,  $J = 5.7$  Hz), 133.4, 132.1, 131.7 (q,  $J = 36.2$  Hz), 129.8, 129.1, 127.5, 125.8, 124.7, 124.5, 122.0 (q,  $J = 270.7$  Hz), 121.3, 121.1, 120.3, 115.3, 113.5, 72.2. HRMS (ESI) Calcd. for  $\text{C}_{25}\text{H}_{15}\text{BrF}_3\text{N}_2\text{O}^+$  [ $\text{M}+\text{H}^+$ ]: 495.0314 ( $^{79}\text{Br}$ ), 497.0294 ( $^{81}\text{Br}$ ), Found: 495.0309 ( $^{79}\text{Br}$ ), 497.0303 ( $^{81}\text{Br}$ ).

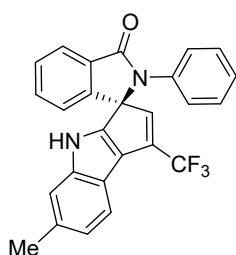

**(R)-6-methyl-2'-phenyl-1-(trifluoromethyl)-4H-spiro**

**[cyclopenta[b]indole-3,1'-isoindolin]-3'-one (2w):** yellow solid, m.p.: 271.9-273.2 °C, 31.1 mg, 72% yield, 86% ee, HPLC condition: Chiralpak IA (isopropyl alcohol/n-hexane: 15/85, 1.0

mL/min.,  $t_{\text{major}} = 9.176$  min.,  $t_{\text{minor}} = 6.718$  min.).  $[\alpha]_{\text{D}}^{20} = +92.1$  (c 1.0, ethyl acetate).  $^1\text{H}$  NMR (400 MHz, DMSO- $d_6$ )  $\delta$  11.84 (s, 1H), 7.95 (d,  $J = 7.3$  Hz, 1H), 7.67–7.53 (m, 2H), 7.37–7.27 (m, 5H), 7.21 (s, 1H), 7.13 (d,  $J = 9.6$  Hz, 1H), 6.95 (d,  $J = 7.8$  Hz, 2H), 6.85 (s, 1H), 2.35 (s, 3H).  $^{13}\text{C}$  NMR (101 MHz, DMSO- $d_6$ )  $\delta$  167.3, 144.7, 141.3, 141.3, 136.4, 133.6 (q,  $J = 5.8$  Hz), 133.3, 132.3 (q,  $J = 35.3$  Hz), 132.1, 131.6, 129.6, 129.0, 127.3, 125.7, 124.4, 122.5, 122.1 (q,  $J = 270.7$  Hz), 121.2, 117.9, 117.7, 115.8, 112.9, 72.2, 21.3. HRMS (ESI) Calcd. for  $\text{C}_{26}\text{H}_{18}\text{F}_3\text{N}_2\text{O}^+$   $[\text{M}+\text{H}^+]$ : 431.1366, Found: 431.1366.

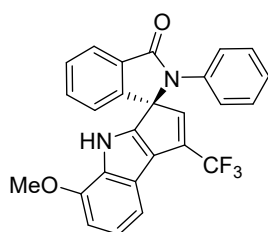

**(R)-5-methoxy-2'-phenyl-1-(trifluoromethyl)-4H-spiro**

**[cyclopenta**[b]**indole-3,1'-isoindolin]-3'-one (2x)**: white solid, m.p.: 286.1-287.2 °C, 17.8 mg, 40% yield, 93% ee, HPLC condition: Chiralpak IA (isopropyl alcohol/n-hexane: 15/85, 1.0 mL/min.,  $t_{\text{major}} = 6.947$  min.,  $t_{\text{minor}} = 5.819$  min.).  $[\alpha]_{\text{D}}^{20} =$

+130.6 (c 1.0, ethyl acetate).  $^1\text{H}$  NMR (400 MHz, DMSO- $d_6$ )  $\delta$  12.07 (s, 1H), 7.94 (d,  $J = 7.4$  Hz, 1H), 7.61 (t,  $J = 7.3$  Hz, 1H), 7.55 (t,  $J = 7.4$  Hz, 1H), 7.37 (d,  $J = 7.9$  Hz, 2H), 7.31 (t,  $J = 7.5$  Hz, 2H), 7.20 (t,  $J = 7.1$  Hz, 1H), 7.03 (d,  $J = 13.4$  Hz, 2H), 6.96–6.82 (m, 2H), 6.71 (d,  $J = 5.7$  Hz, 1H), 3.84 (s, 3H).  $^{13}\text{C}$  NMR (101 MHz, DMSO- $d_6$ )  $\delta$  167.4, 146.7, 145.0, 141.2, 136.6, 134.0 (q,  $J = 5.7$  Hz), 133.1, 132.4, 132.2 (q,  $J = 35.7$  Hz), 130.8, 129.5, 129.0, 127.2, 125.8, 124.3, 122.2 (q,  $J = 270.7$  Hz), 121.5, 121.1, 120.8, 116.4, 110.9, 102.7, 72.1, 55.3. HRMS (ESI) Calcd. for  $\text{C}_{26}\text{H}_{18}\text{F}_3\text{N}_2\text{O}_2^+$   $[\text{M}+\text{H}^+]$ : 447.1315, Found: 447.1320.

## 4. Control Experiments



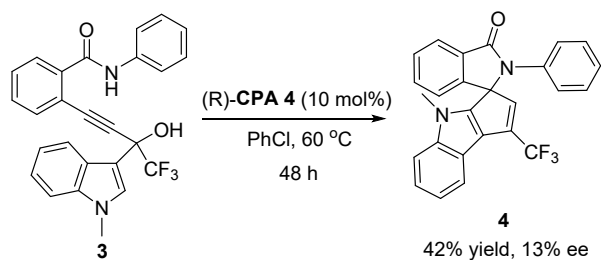

Compound **3** (0.10 mmol) and (*R*)-CPA**4** (10 mol%) were dissolved in PhCl (2.0 mL) and stirred at 60 °C. The reaction progress was monitored by TLC. Upon completion, the mixture was subjected to column chromatography on silica gel (petroleum ether/ EtOAc = 5:1) to afford the desired product **4**.

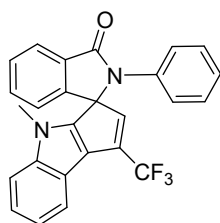

**4-Methyl-2'-phenyl-1-(trifluoromethyl)-4H-**

**spiro[cyclopenta[b]indole-3,1'-isoindolin]-3'-one (4):** yellow

solid, m.p.: 179.2-182.1 °C, 18.0 mg, 42% yield, 13% ee, HPLC condition: Chiralpak AD-H (isopropyl alcohol/n-hexane: 10/90,

1.0 mL/min.,  $t_{\text{major}} = 6.484$  min.,  $t_{\text{minor}} = 8.280$  min.).  $[\alpha]_{\text{D}}^{20} = +13.1$

(c 1.0, ethyl acetate).  $^1\text{H}$  NMR (400 MHz, DMSO- $d_6$ )  $\delta$  7.99 (dd,  $J = 6.8, 0.7$  Hz, 1H), 7.72–7.58 (m, 2H), 7.47 (dd,  $J = 10.4, 4.4$  Hz, 2H), 7.39–7.29 (m, 4H), 7.27–7.14 (m, 3H), 7.04–6.98 (m, 1H), 6.90 (dd,  $J = 4.0, 2.1$  Hz, 1H), 3.35 (s, 3H).  $^{13}\text{C}$  NMR (101 MHz, DMSO- $d_6$ )  $\delta$  167.1, 144.5, 141.4, 139.5, 136.3, 134.4 (q,  $J = 5.7$  Hz), 133.8, 132.0, 131.9 (q,  $J = 35.3$  Hz), 130.1, 129.2, 127.5, 125.2, 124.7, 122.4, 122.1 (q,  $J = 270.7$  Hz), 121.4, 121.4, 119.3, 118.5, 115.7, 111.5, 72.2, 30.3. HRMS (ESI) Calcd. for  $\text{C}_{26}\text{H}_{17}\text{F}_3\text{N}_2\text{NaO}^+$  [ $\text{M}+\text{Na}^+$ ]: 453.1185, Found: 453.1195.

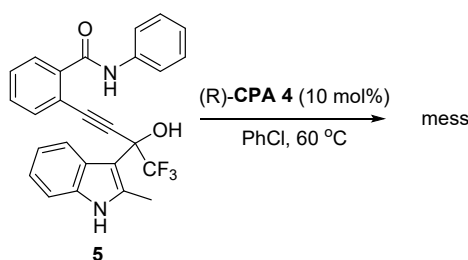

Compound **5** (0.10 mmol) and (*R*)-CPA**4** (10 mol%) were dissolved in PhCl (2.0 mL) and stirred at 60 °C. The reaction progress was monitored by TLC.

## 5. Reaction at mmol-scale and product transformation

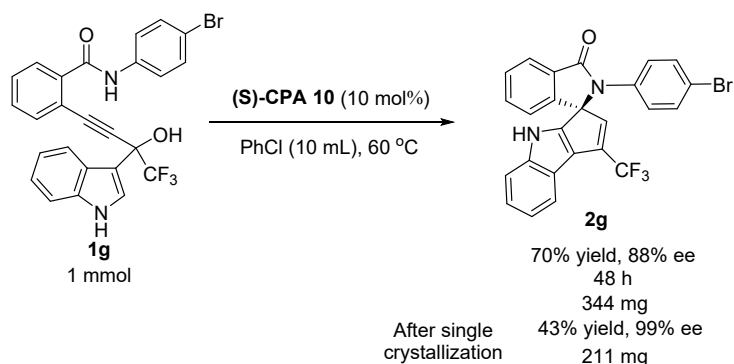

Compound **1g** (1.0 mmol) and **(S)-CPA10** (10 mol%) were dissolved in PhCl (10.0 mL) and stirred at 60 °C. The reaction progress was monitored by TLC. Upon completion, the mixture was subjected to column chromatography on silica gel (petroleum ether/EtOAc =5:1) to afford the desired product **2g** in 70% yield (344 mg, 88% ee). After a single crystallization (EtOH/petroleum ether), the desired product **2g** was obtained in 43% yield (211 mg, 99% ee).

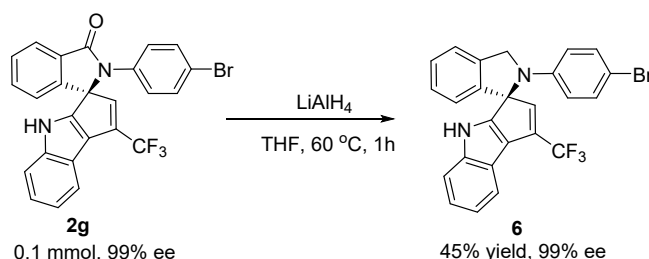

Compound **6** was prepared according to a modified known procedure<sup>[4]</sup>.  $\text{LiAlH}_4$  (0.3 mmol) was added to a freshly distilled THF (1.0 mL) solution of **2g** (0.10 mmol) at 0 °C. After 1 hour at 60 °C, reaction mixture was quenched with ice water and extracted with EtOAc. Organic layers were collected, dried over  $\text{Na}_2\text{SO}_4$ , filtered and evaporated under reduced pressure. Column chromatography of the residue on silica gel (petroleum ether/ethyl acetate 10:1) afforded compound **6**.

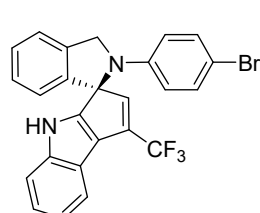

**(R)-2'-(4-bromophenyl)-1-(trifluoromethyl)-4H-spiro[cyclopenta[b]indole-3,1'-isoindoline] (6):** white solid, m.p.: 198.4.-199.5 °C, 21.7 mg, 45% yield, 99% ee, HPLC condition:

Chiralpak IA (ethyl alcohol/n-hexane: 5/95, 1.0 mL/min.,  $t_{\text{major}} = 7.595$  min.,  $t_{\text{minor}} = 8.642$  min.).  $[\alpha]_{\text{D}}^{20} = +212.3$  (c 1.0, ethyl acetate).  $^1\text{H NMR}$  (400 MHz, DMSO- $d_6$ )  $\delta$  11.84 (s, 1H), 7.65–7.53 (m, 2H), 7.41–7.29 (m, 2H), 7.28–7.22 (m, 2H), 7.21–7.09 (m, 3H), 6.75 (dd,  $J = 4.0, 2.2$  Hz, 1H), 6.51 (d,  $J = 7.7$  Hz, 1H), 6.46–6.34 (m, 2H), 4.99 (d,  $J = 13.6$  Hz, 1H), 4.92 (d,  $J = 13.6$  Hz, 1H).  $^{13}\text{C NMR}$  (101 MHz, DMSO- $d_6$ )  $\delta$  151.1, 144.8, 140.9, 138.6, 137.4, 136.9 (q,  $J = 5.6$  Hz), 131.7, 129.8 (q,  $J = 35.7$  Hz), 128.5, 127.9, 123.5, 122.5 (q,  $J = 269.7$  Hz), 121.9, 120.7, 120.6, 120.0, 118.4, 114.4, 114.0, 113.0, 108.7, 74.7, 54.5. HRMS(ESI) Calcd. for  $\text{C}_{25}\text{H}_{17}\text{BrF}_3\text{N}_2^+$   $[\text{M}+\text{H}^+]$ : 481.0522 ( $^{79}\text{Br}$ ), 483.0501 ( $^{81}\text{Br}$ ), Found: 481.0525 ( $^{79}\text{Br}$ ), 483.0517 ( $^{81}\text{Br}$ ).

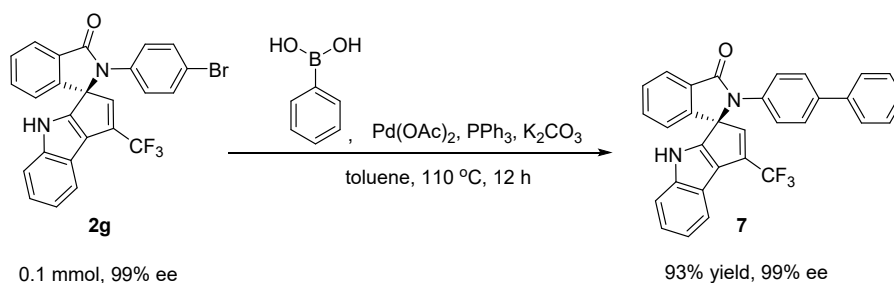

A Schlenk tube was charged with a mixture of **2g** (0.10 mmol), phenylboronic acid (0.2 mmol),  $\text{Pd}(\text{OAc})_2$  (0.005 mmol),  $\text{PPh}_3$  (0.011 mmol) and  $\text{K}_2\text{CO}_3$  (0.3 mmol) in toluene (1 mL). The reaction mixture was stirred at 110 °C under an argon atmosphere. The reaction progress was monitored by TLC. Upon completion, the mixture was subjected to column chromatography on silica gel (petroleum ether/EtOAc = 2:1) to afford the desired product **7**<sup>[5]</sup>.

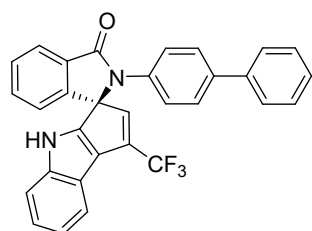

**(R)-2'--([1,1'-biphenyl]-4-yl)-1-(trifluoro-methyl)-4H-spiro[cyclopenta[b]indole-3,1'-isoindolin]-3'-one (7):**

white solid, m.p.: 292.3-293.3 °C, 46.0 mg, 93% yield, 99% ee, HPLC condition: Chiralpak IA (isopropyl alcohol/n-

hexane: 15/85, 1.0 mL/min.,  $t_{\text{major}} = 22.041$  min.,  $t_{\text{minor}} = 11.296$  min).  $[\alpha]_{\text{D}}^{20} = +167.3$  (c 1.0, ethyl acetate).  $^1\text{H NMR}$  (400 MHz, DMSO- $d_6$ )  $\delta$  12.06 (s, 1H), 7.98 (d,  $J = 7.4$  Hz, 1H), 7.71–7.54 (m, 6H), 7.50 (d,  $J = 5.9$  Hz, 1H), 7.45 (d,  $J = 8.3$  Hz, 2H), 7.43–7.35 (m, 3H), 7.32 (t,  $J = 7.2$  Hz, 1H), 7.15 (d,  $J = 6.3$  Hz, 2H), 6.96 (d,  $J = 6.6$  Hz,

2H). <sup>13</sup>C NMR (101 MHz, DMSO-d<sub>6</sub>) δ 167.4, 145.6, 141.1, 140.9, 139.1, 138.7, 135.9, 133.9 (q, *J* = 5.5 Hz), 133.4, 132.2 (q, *J* = 35.3 Hz), 132.0, 129.7, 128.9, 127.6, 127.2, 126.6, 125.5, 124.4, 122.2, 122.1 (q, *J* = 269.7 Hz), 121.2, 120.9, 119.7, 118.3, 115.9, 113.2, 72.1. HRMS (ESI) Calcd. for C<sub>31</sub>H<sub>20</sub>F<sub>3</sub>N<sub>2</sub>O<sup>+</sup> [M+H<sup>+</sup>]: 493.1522, Found: 493.1525.

## References

- [1] M. Huang, S. Shi, M. Li, Y. Liu and M. Zeng, *Org. Lett.*, 2021, **23**, 7094-7099.
- [2] S. Liu, Y. Tanabe, S. Kuriyama, K. Sakata and Y. Nishibayashi, *Angew. Chem. Int. Ed.* 2021, **60**, 11231.
- [3] T. Sakamoto, T. Nagano, Y. Kondo and H. Yamanaka, *Chem. Pharm. Bull.* 1988, **36**, 2248-2252.
- [4] T. Nikola, D. Marina, C. Ana and G. Matija, *J. Org. Chem.* 2022, **87**, 3712-3717.
- [5] N. Miyaura and A. Suzuki, *Chem. Rev.* 1995, **95**, 2457–2483.

## 6. X-ray crystal structure of 2g

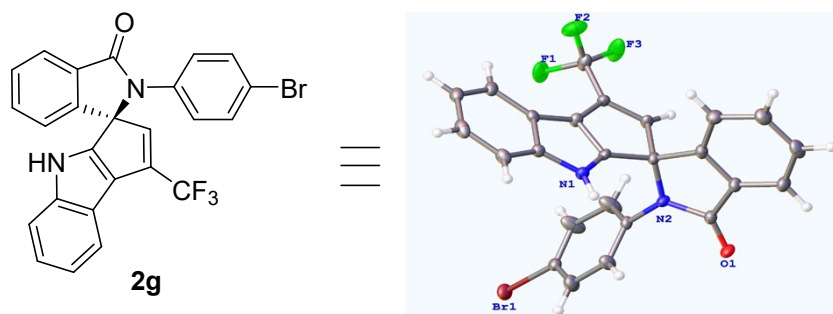

**Table S1** Crystal data and structure refinement for 2g.

|                                    |                                                                   |
|------------------------------------|-------------------------------------------------------------------|
| Identification code                | 2g                                                                |
| Empirical formula                  | C <sub>25</sub> H <sub>14</sub> BrF <sub>3</sub> N <sub>2</sub> O |
| Formula weight                     | 495.29                                                            |
| Temperature/K                      | 211(50)                                                           |
| Crystal system                     | monoclinic                                                        |
| Space group                        | P2 <sub>1</sub>                                                   |
| a/Å                                | 9.6192(6)                                                         |
| b/Å                                | 11.1853(7)                                                        |
| c/Å                                | 9.6445(8)                                                         |
| α/°                                | 90                                                                |
| β/°                                | 94.316(6)                                                         |
| γ/°                                | 90                                                                |
| Volume/Å <sup>3</sup>              | 1034.75(12)                                                       |
| Z                                  | 2                                                                 |
| ρ <sub>calc</sub> /cm <sup>3</sup> | 1.590                                                             |
| μ/mm <sup>-1</sup>                 | 3.131                                                             |
| F(000)                             | 496.0                                                             |
| Crystal size/mm <sup>3</sup>       | 0.16 × 0.11 × 0.09                                                |
| Radiation                          | Cu Kα (λ = 1.54184)                                               |
| 2θ range for data collection/°     | 9.196 to 147.462                                                  |

|                                             |                                                               |
|---------------------------------------------|---------------------------------------------------------------|
| Index ranges                                | -11 ≤ h ≤ 10, -11 ≤ k ≤ 13, -11 ≤ l ≤ 11                      |
| Reflections collected                       | 5851                                                          |
| Independent reflections                     | 3131 [R <sub>int</sub> = 0.0425, R <sub>sigma</sub> = 0.0348] |
| Data/restraints/parameters                  | 3131/1/290                                                    |
| Goodness-of-fit on F <sup>2</sup>           | 1.080                                                         |
| Final R indexes [I ≥ 2σ (I)]                | R <sub>1</sub> = 0.0507, wR <sub>2</sub> = 0.1451             |
| Final R indexes [all data]                  | R <sub>1</sub> = 0.0537, wR <sub>2</sub> = 0.1517             |
| Largest diff. peak/hole / e Å <sup>-3</sup> | 0.73/-1.50                                                    |
| Flack/Hoofit parameter                      | 0.12(3)/0.169(10)                                             |

## 7. $^1\text{H}$ NMR and $^{13}\text{C}$ NMR spectra

**N-phenyl-2-(4,4,4-trifluoro-3-hydroxy-3-(1H-indol-3-yl)but-1-yn-1-yl)benzamide (1a).**

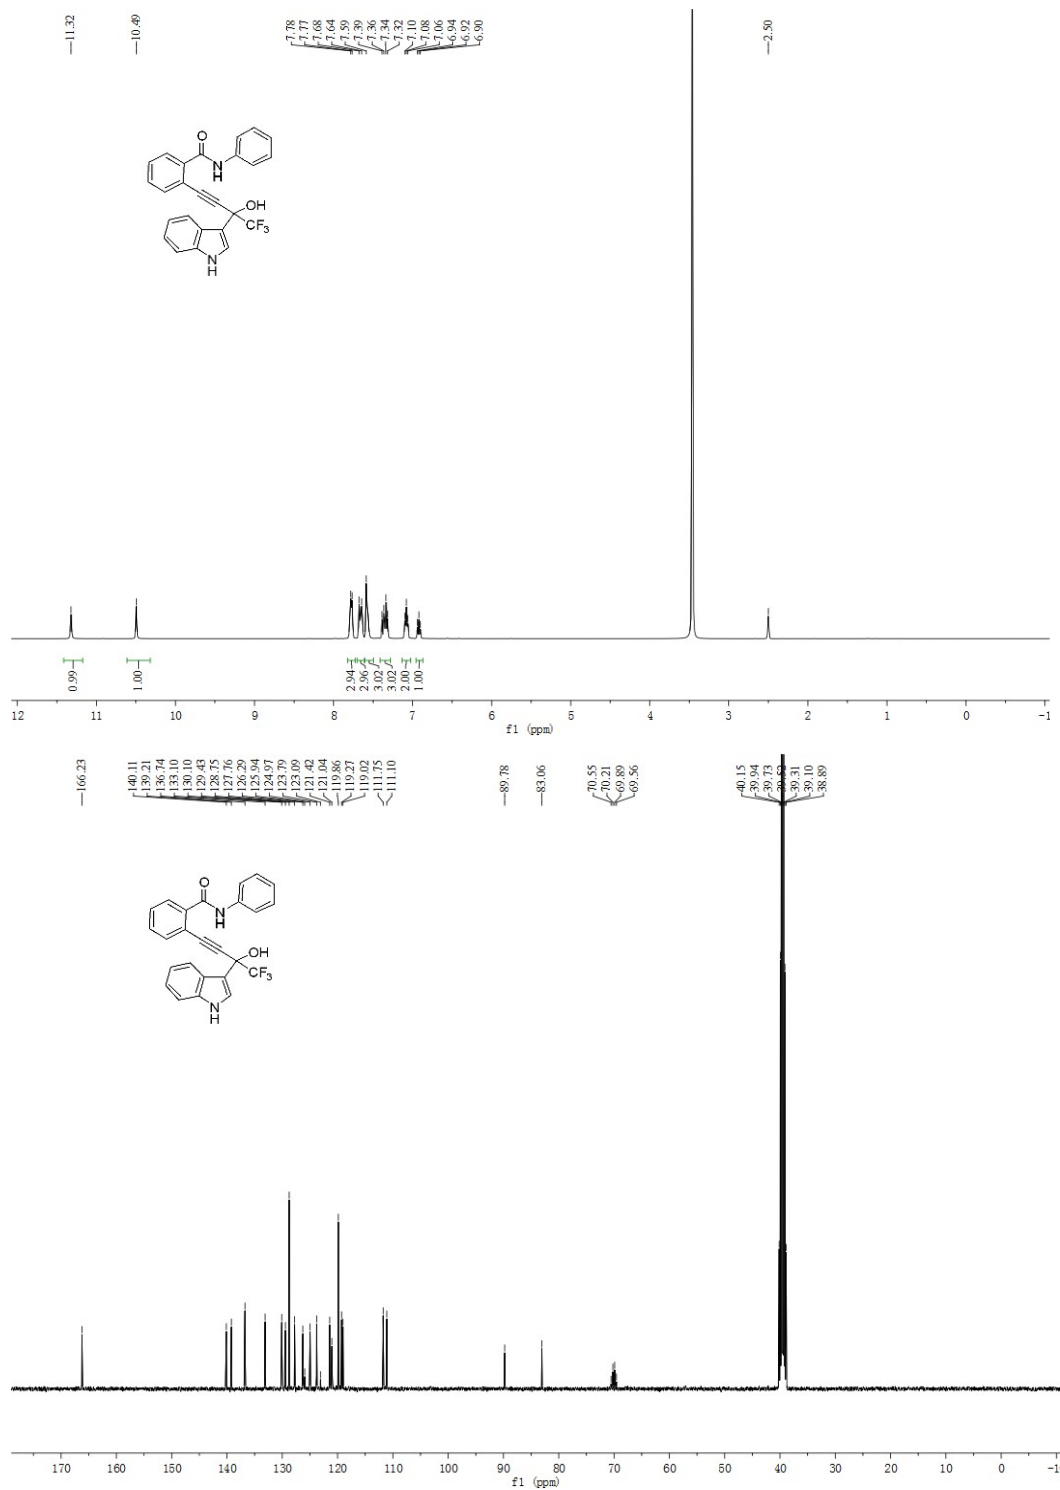

**N-(2-methoxyphenyl)-2-(4,4,4-trifluoro-3-hydroxy-3-(1H-indol-3-yl)but-1-yn-1-yl)benzamide (1b)**

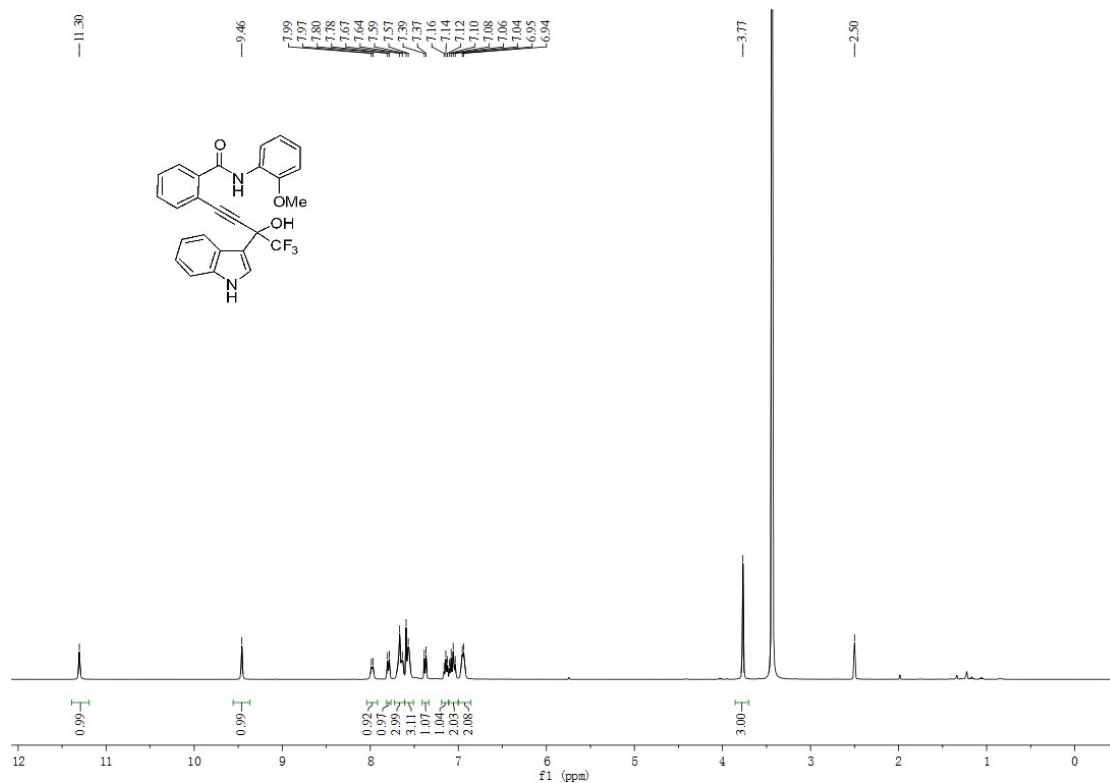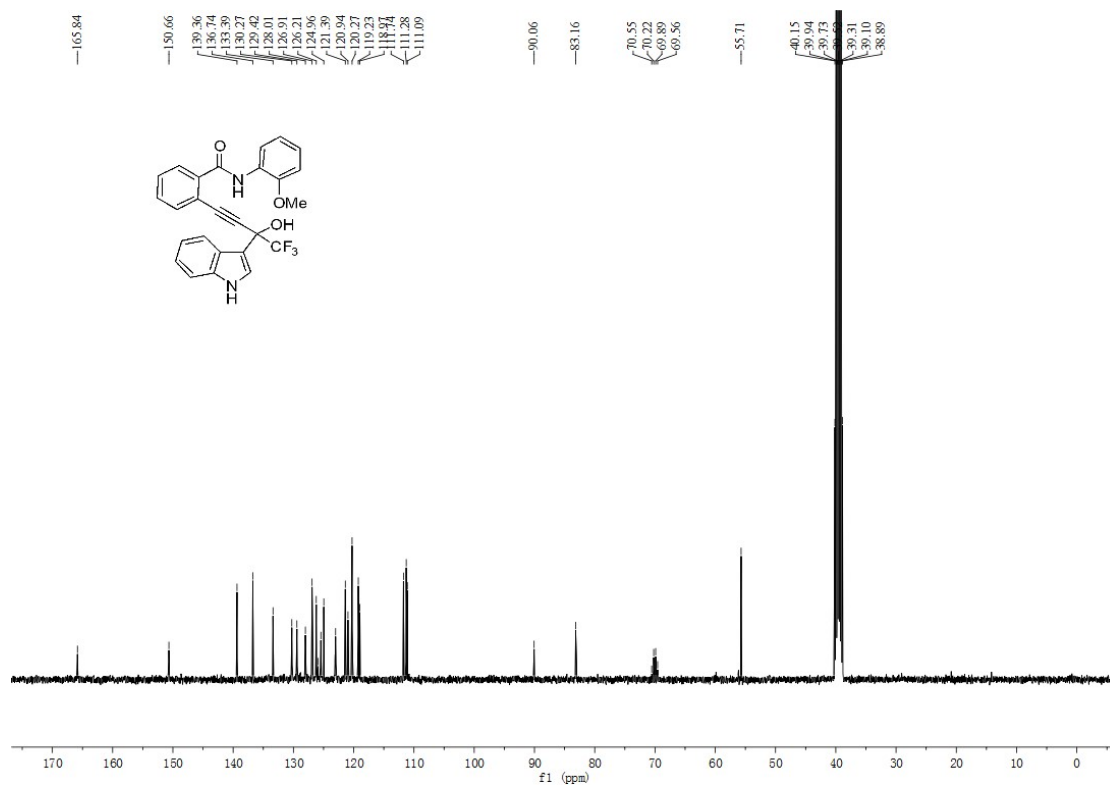



**N-(4-methoxyphenyl)-2-(4,4,4-trifluoro-3-hydroxy-3-(1H-indol-3-yl)but-1-yn-1-yl)benzamide (1c)**

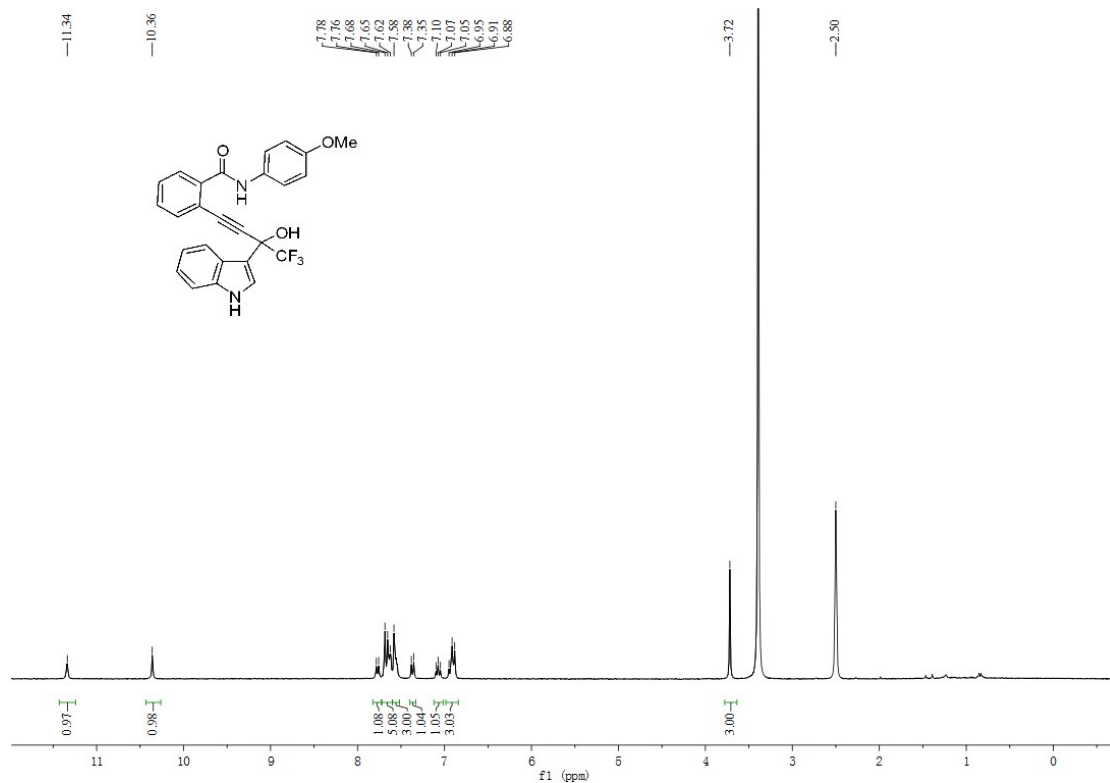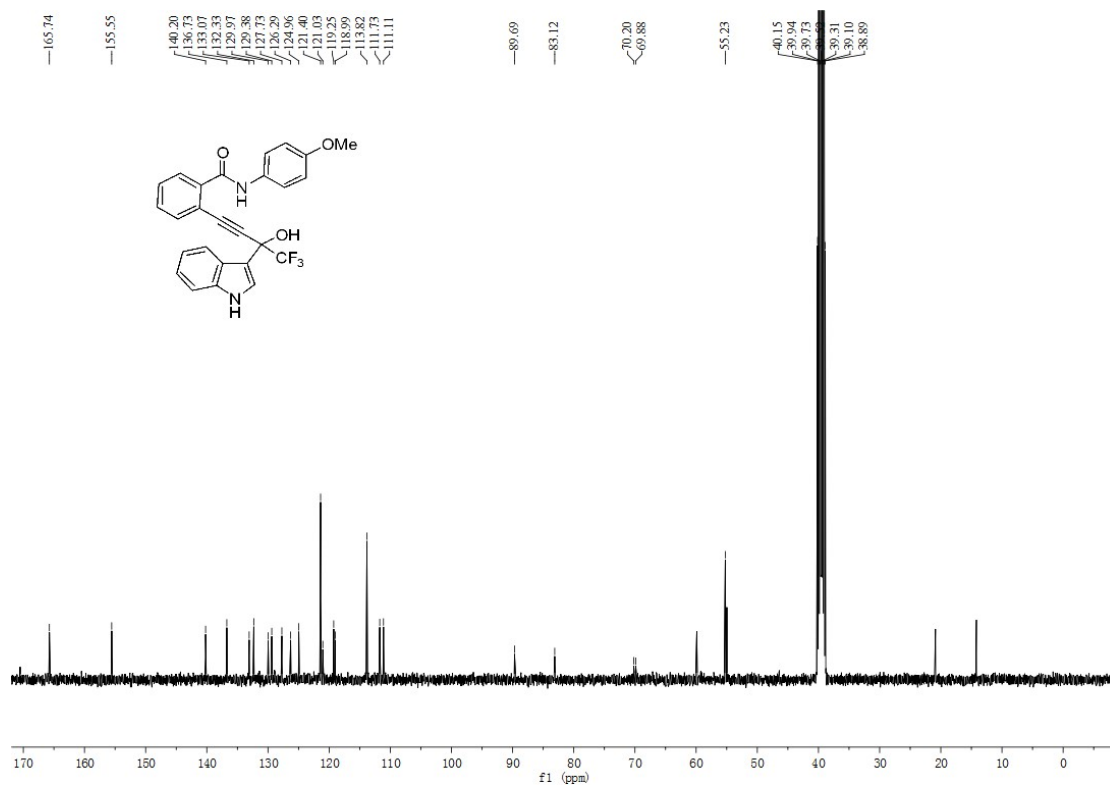

**N-(p-tolyl)-2-(4,4,4-trifluoro-3-hydroxy-3-(1H-indol-3-yl)but-1-yn-1-yl)benzamide 1d**

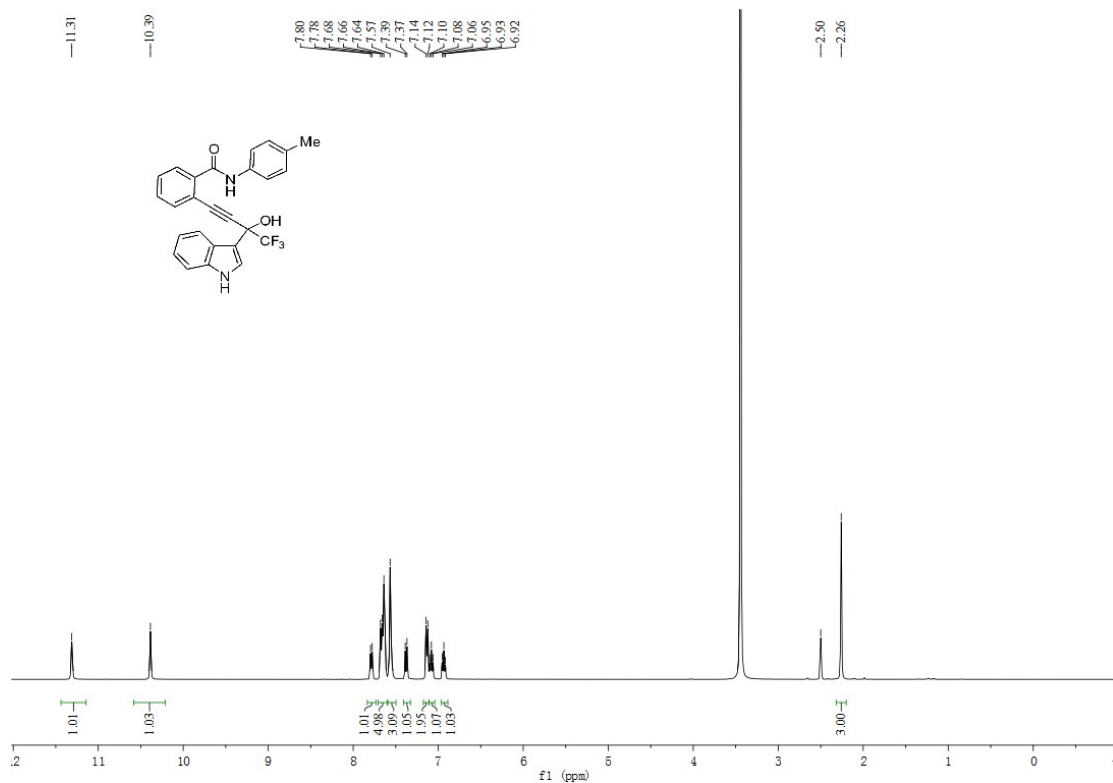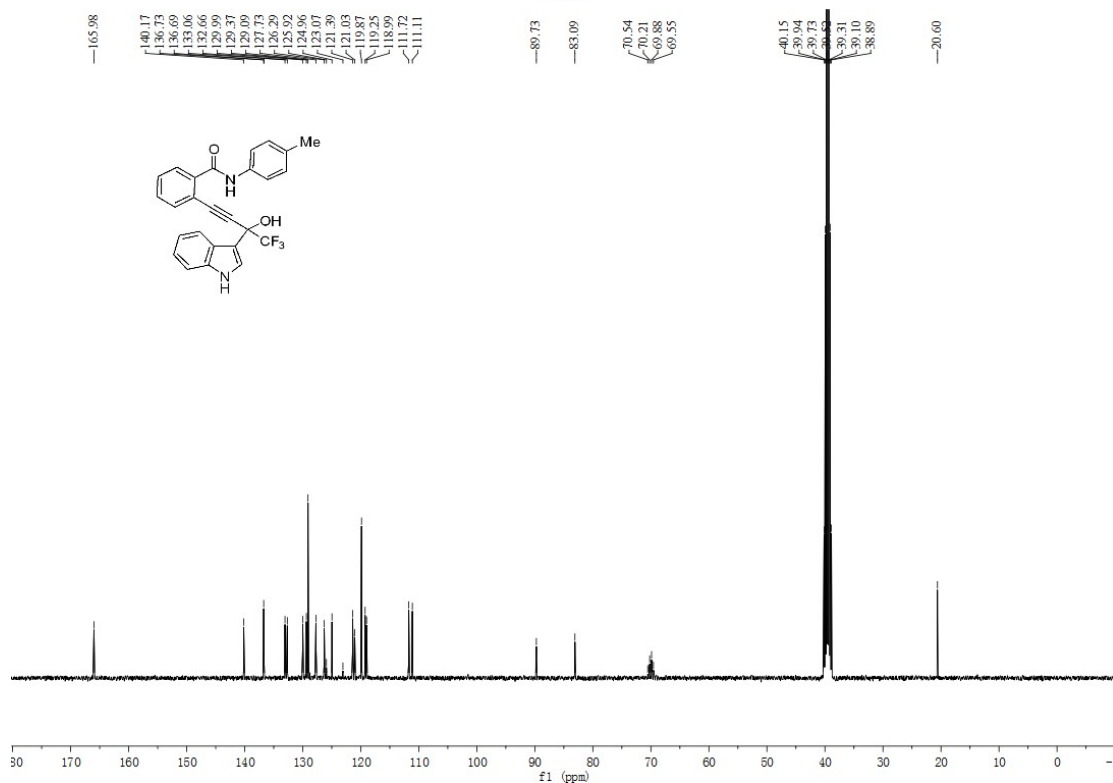

**N-(4-chlorophenyl)-2-(4,4,4-trifluoro-3-hydroxy-3-(1H-indol-3-yl)but-1-yn-1-yl)benzamide (1e)**

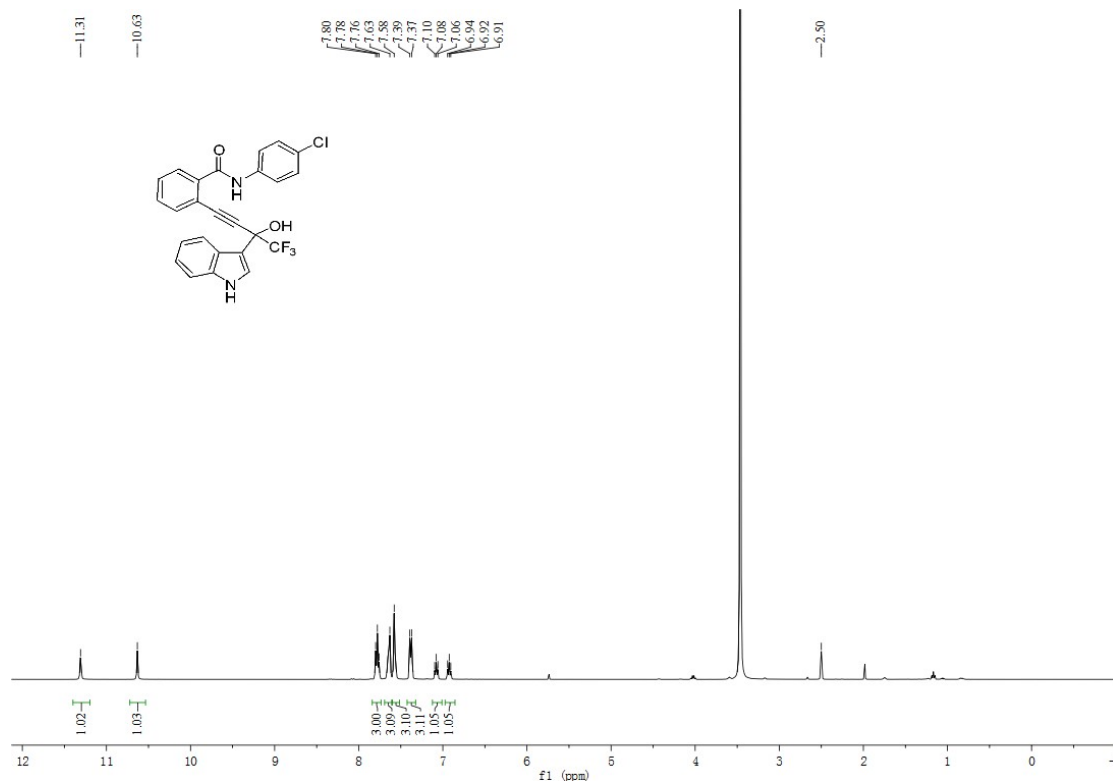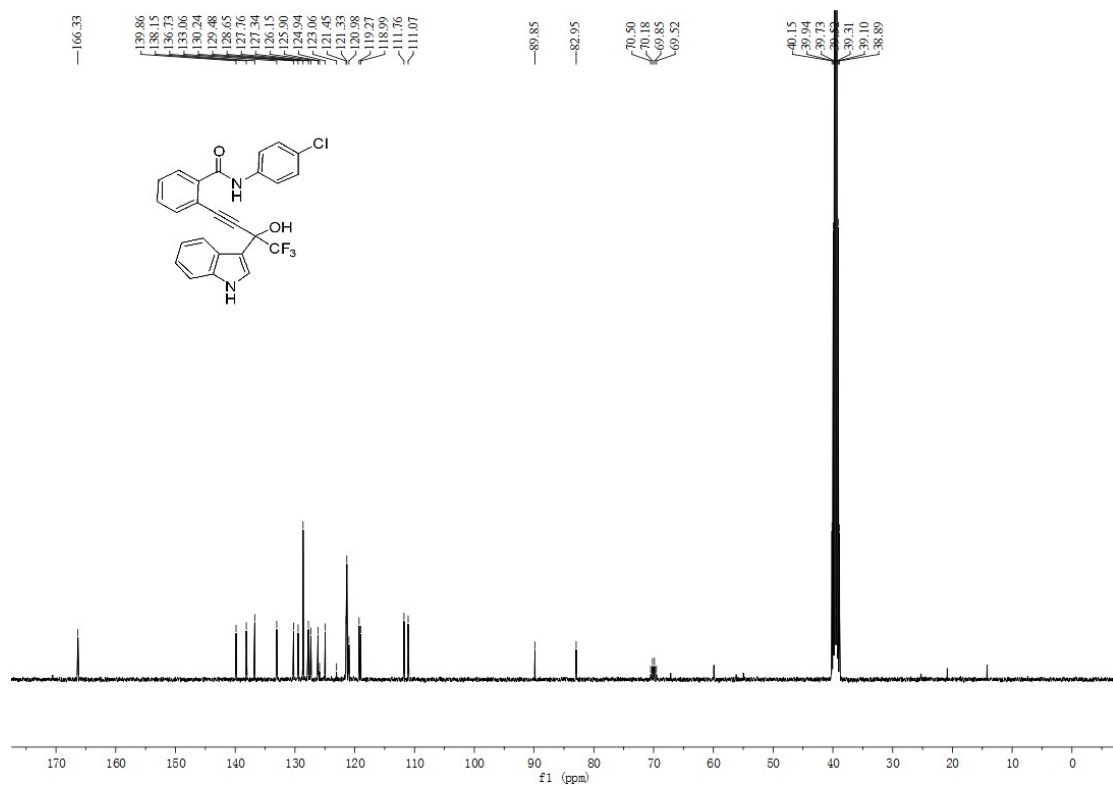

**N-(4-(tert-butyl)phenyl)-2-(4,4,4-trifluoro-3-hydroxy-3-(1H-indol-3-yl)but-1-yn-1-yl)benzamide (1f)**

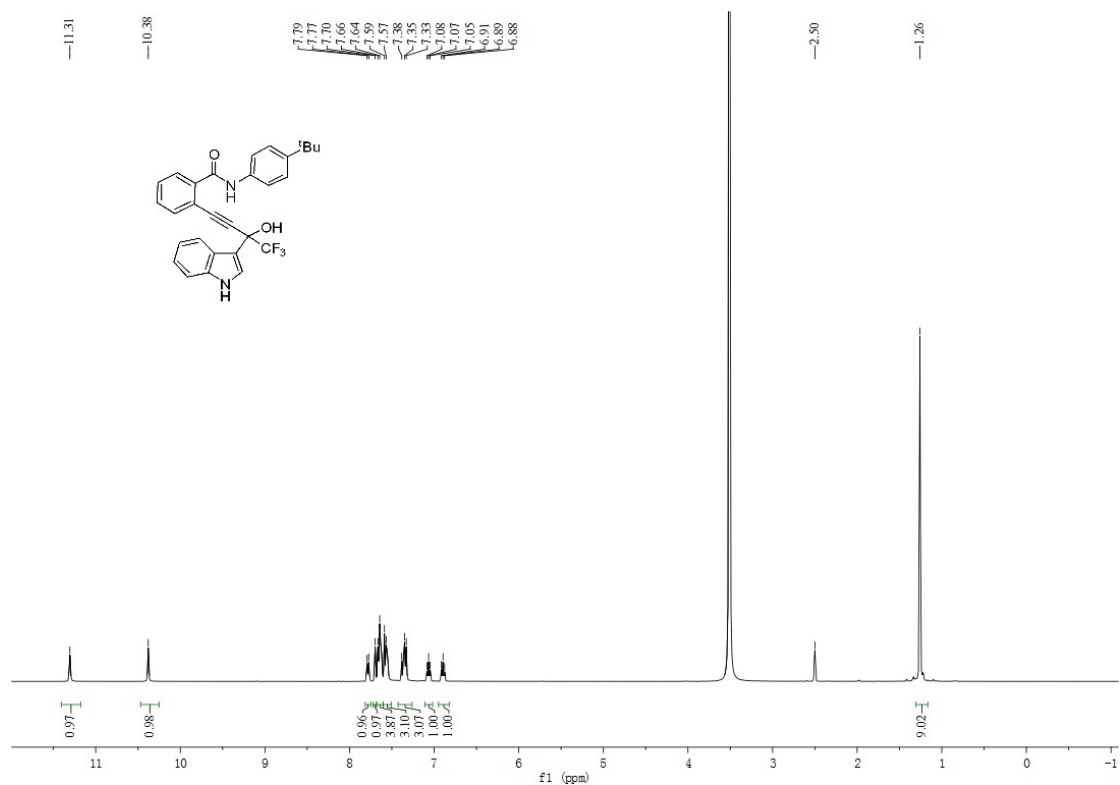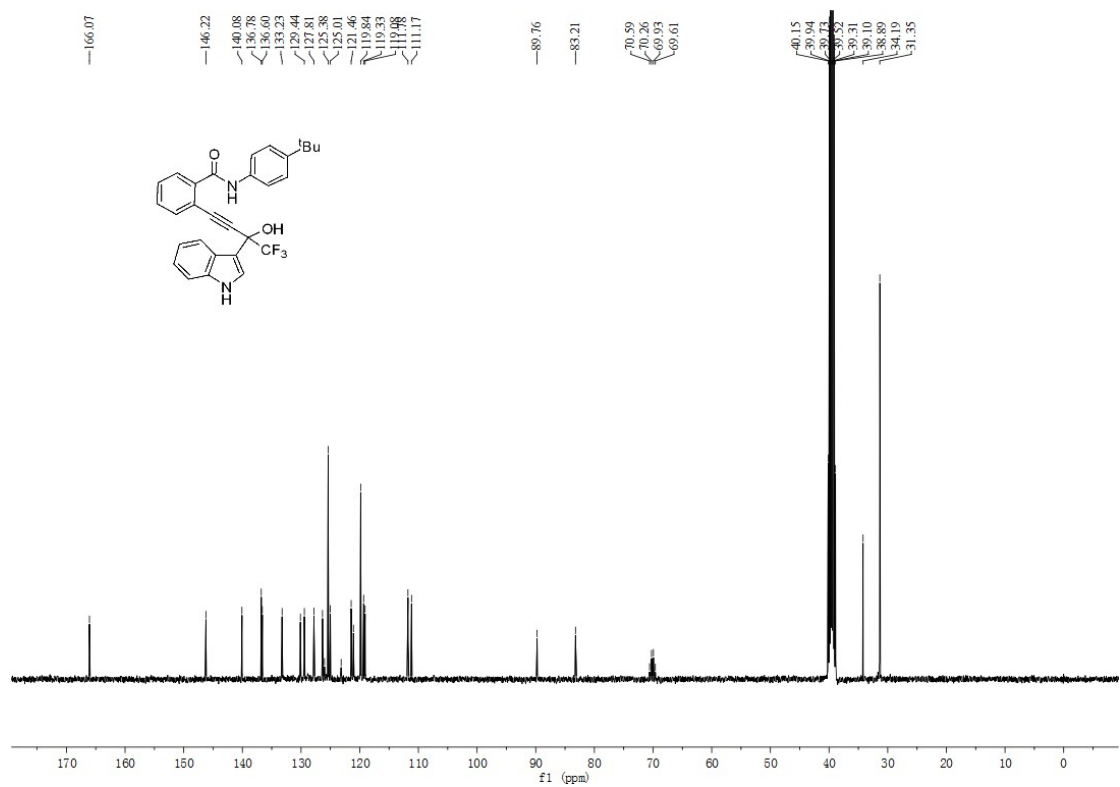

**N-(4-bromophenyl)-2-(4,4,4-trifluoro-3-hydroxy-3-(1H-indol-3-yl)but-1-yn-1-yl)benzamide (1g)**

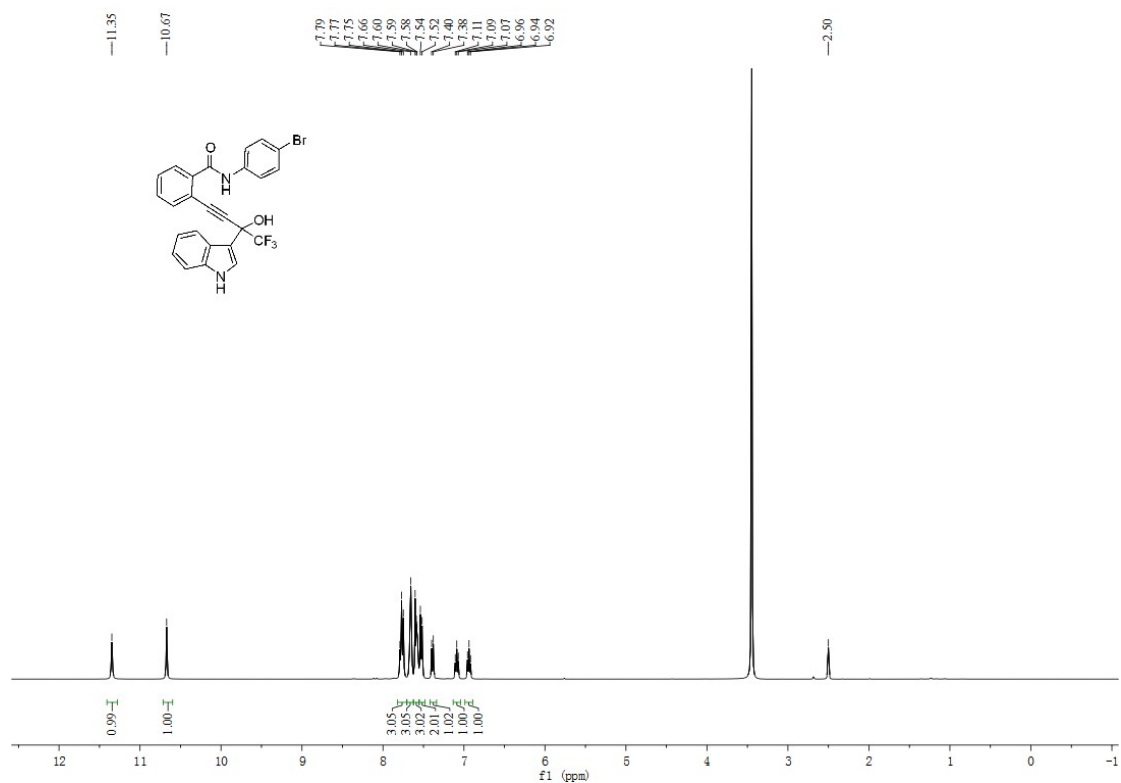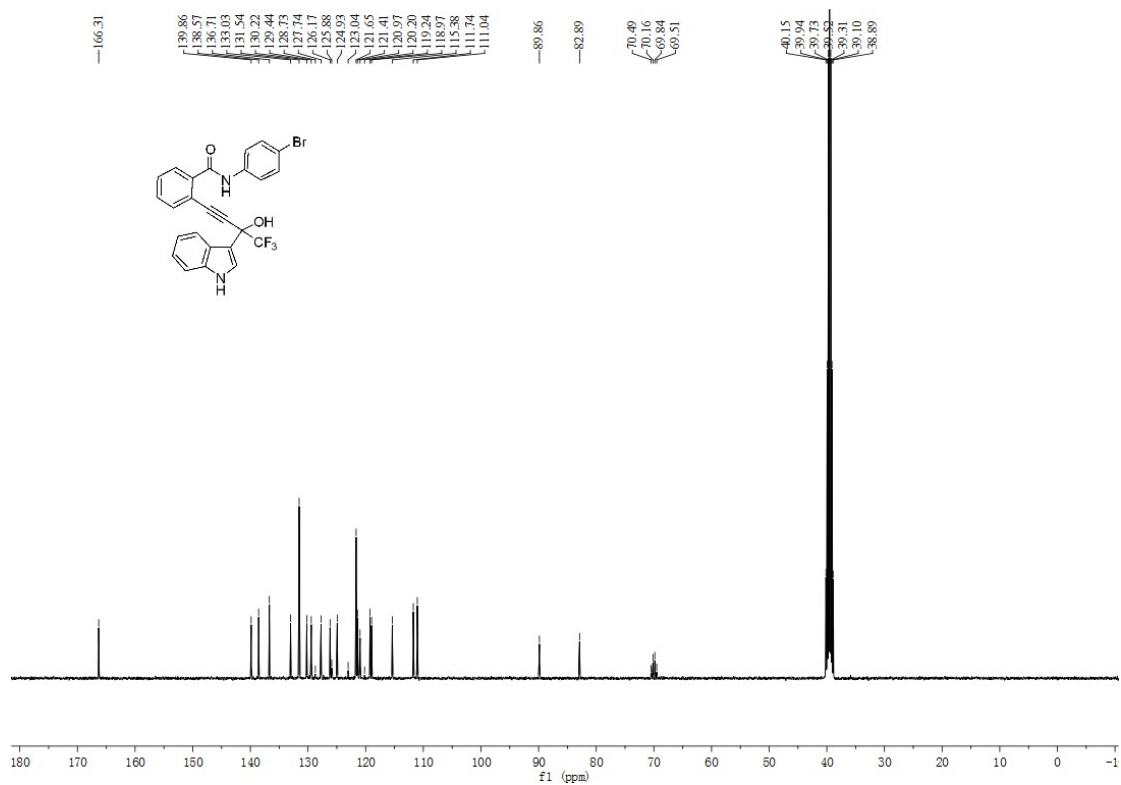

**Ethyl 4-(2-(4,4,4-trifluoro-3-hydroxy-3-(1H-indol-3-yl)but-1-yn-1-yl)benzamido)benzoate (1h)**

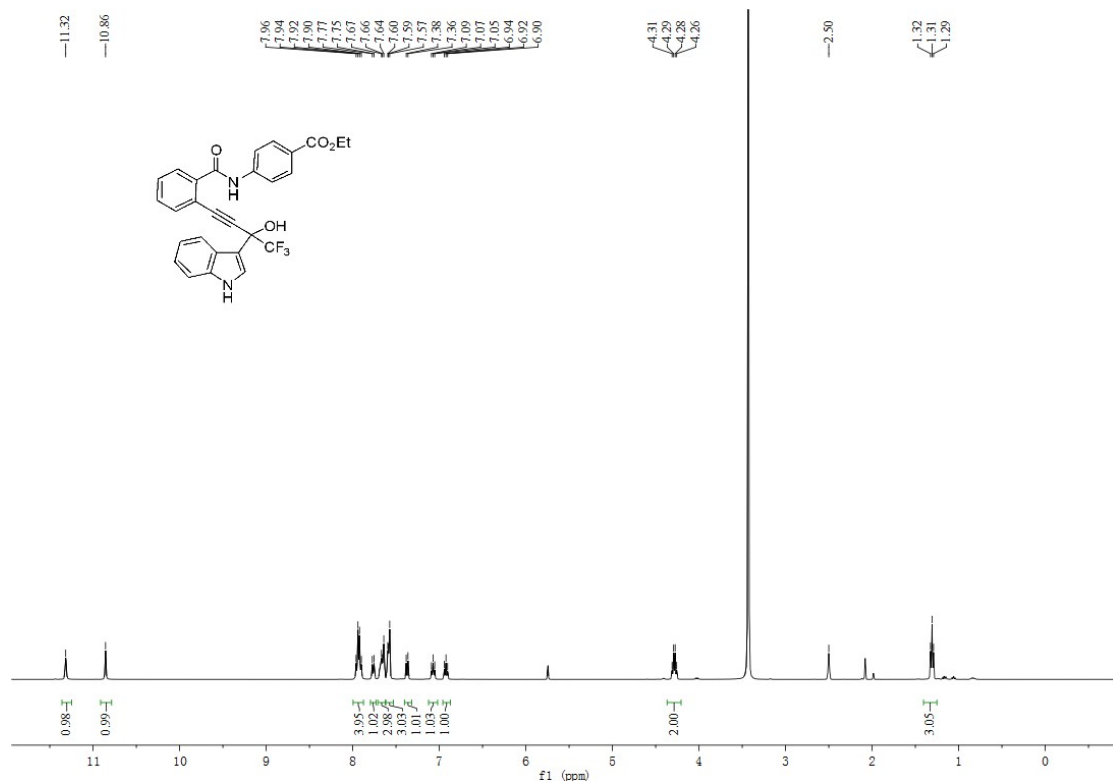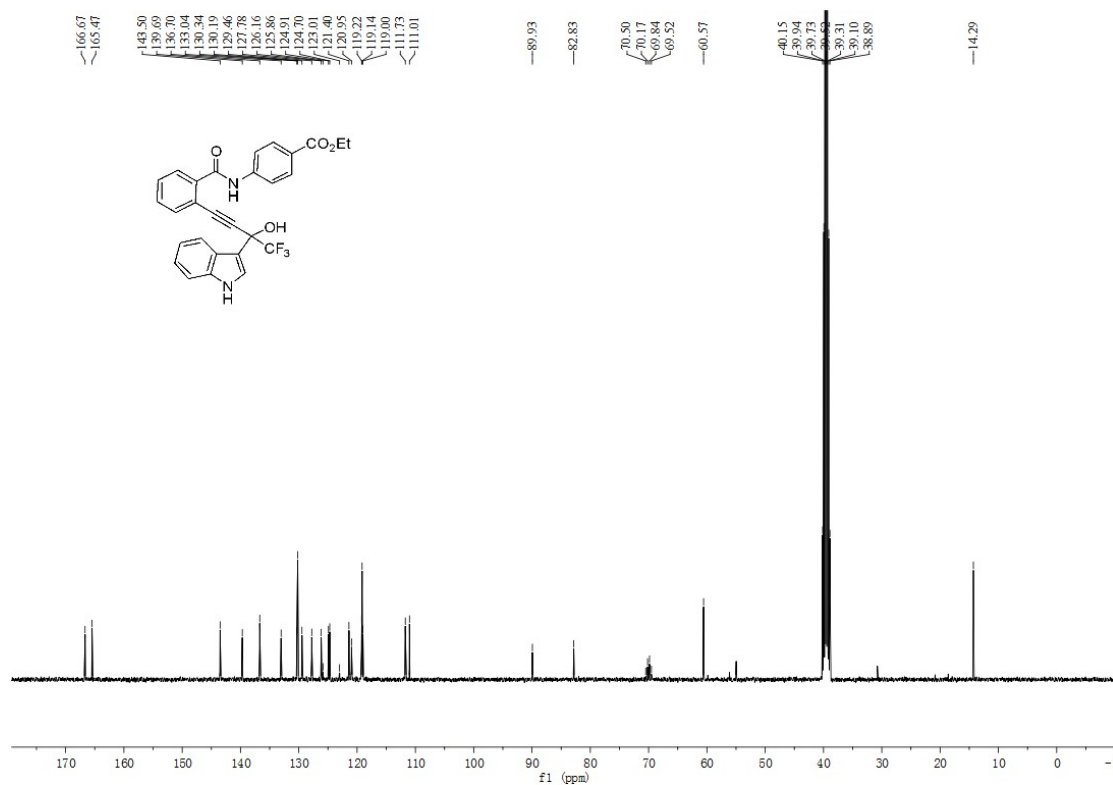

**N-(2-nitrophenyl)-2-(4,4,4-trifluoro-3-hydroxy-3-(1H-indol-3-yl)but-1-yn-1-yl)benzamide (1i)**

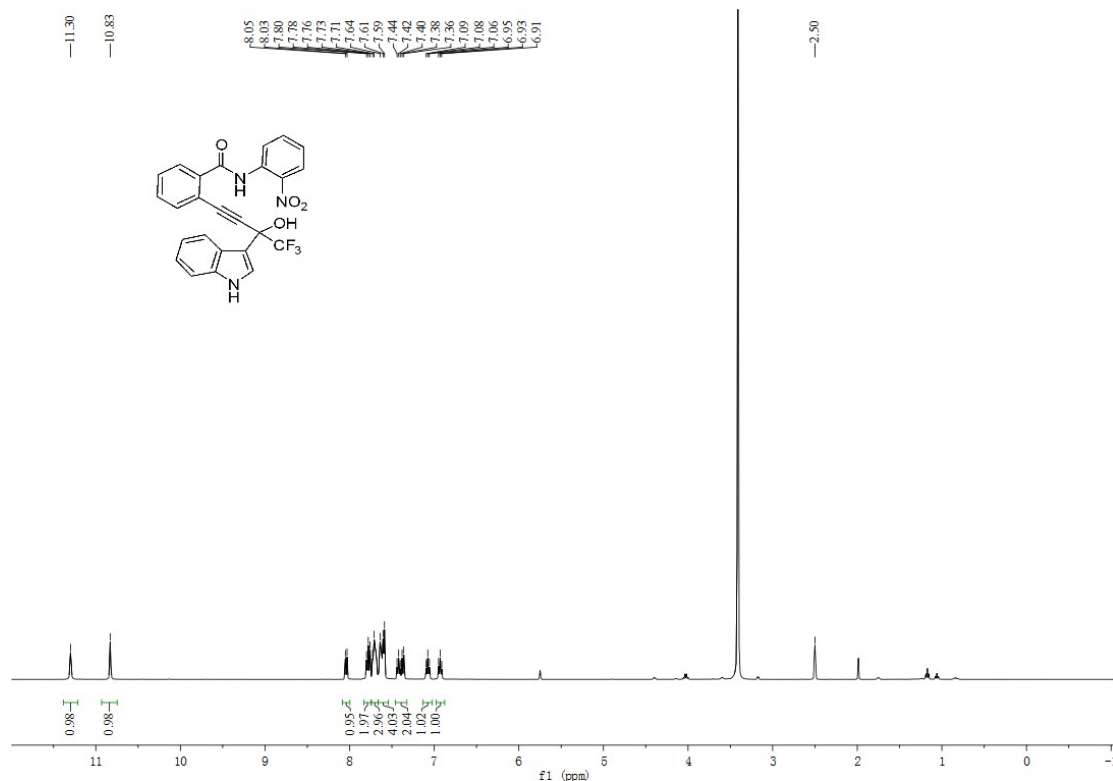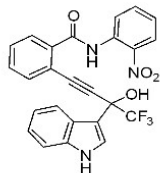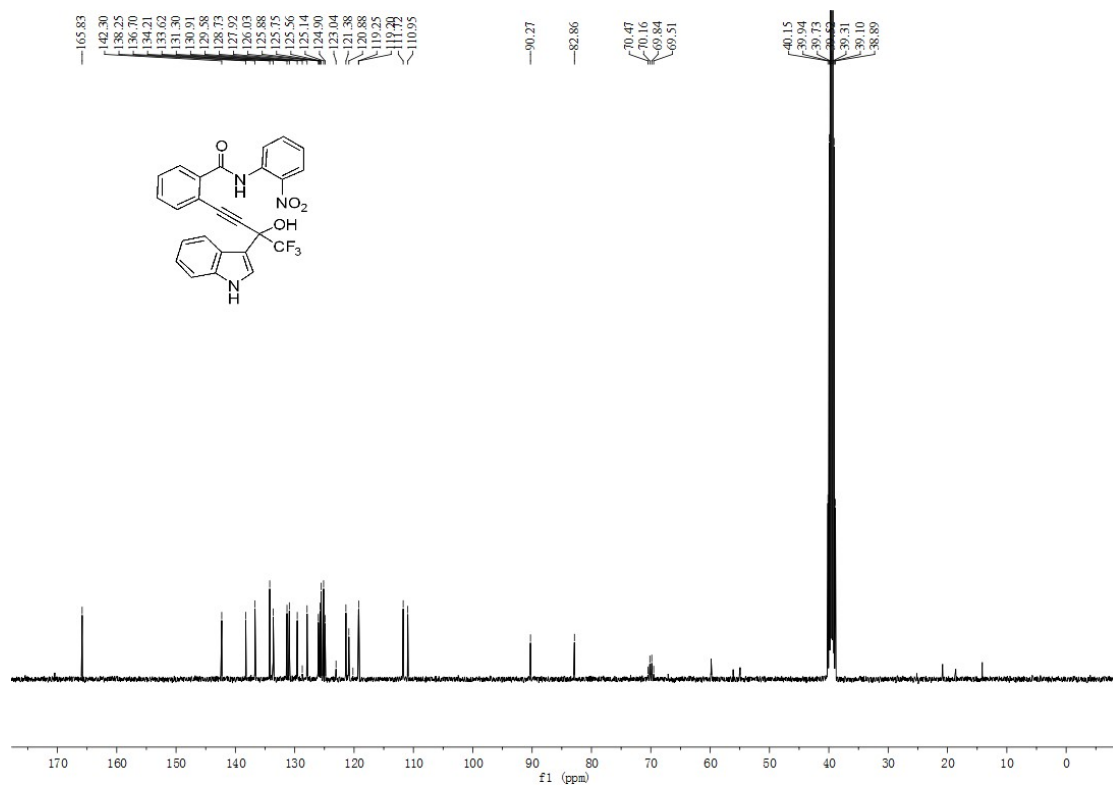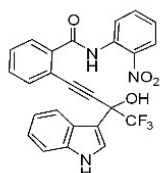

**N-(naphthalen-2-yl)-2-(4,4,4-trifluoro-3-hydroxy-3-(1H-indol-3-yl)but-1-yn-1-yl)benzamide (1j)**

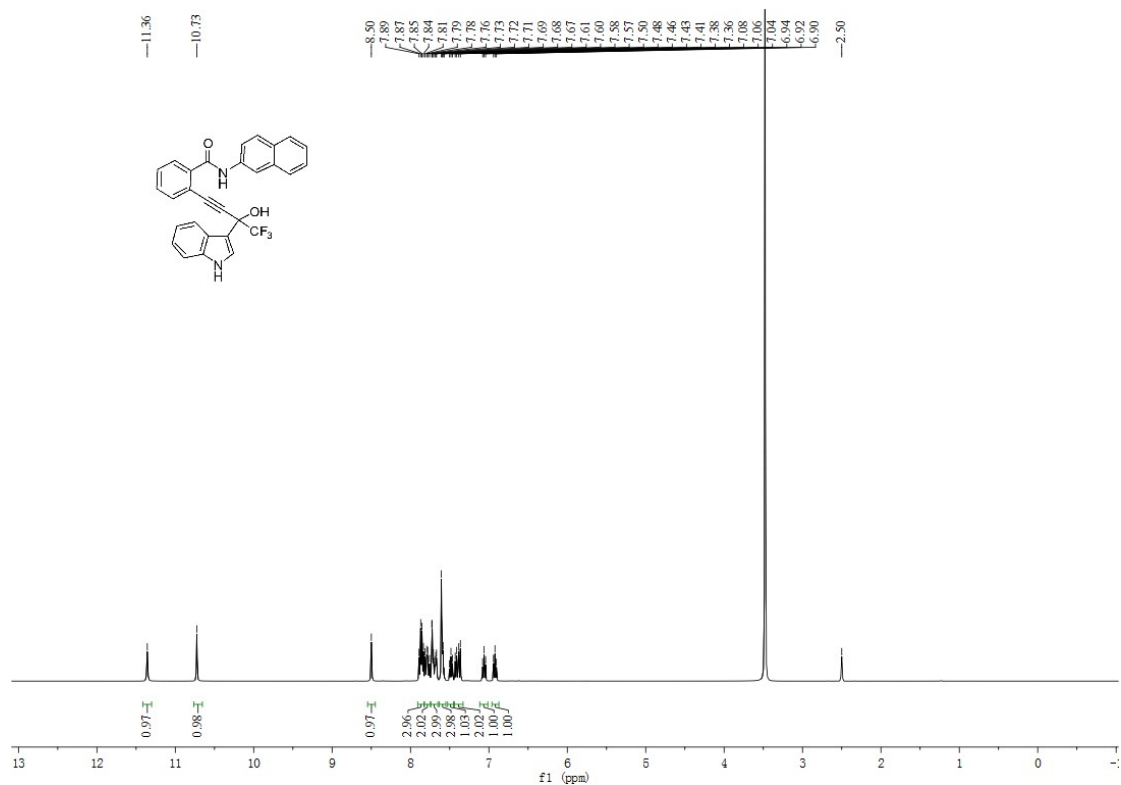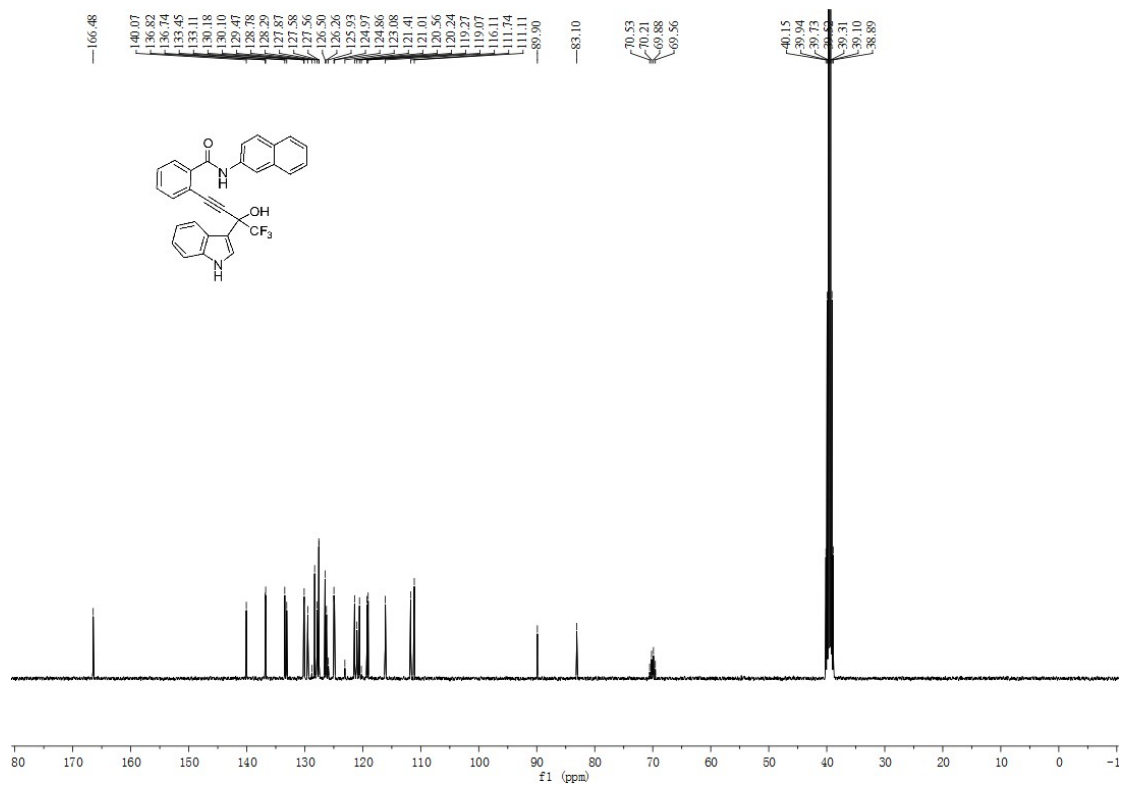



**N-propyl-2-(4,4,4-trifluoro-3-hydroxy-3-(1H-indol-3-yl)but-1-yn-1-yl)benzamide (1k)**

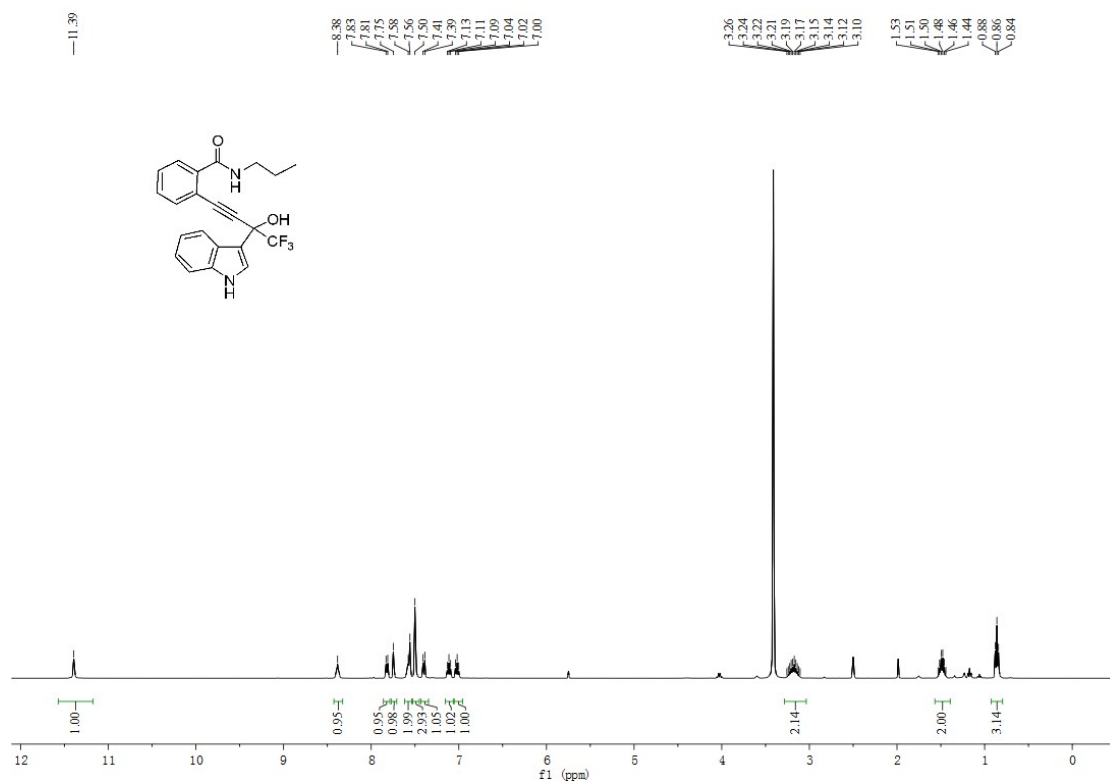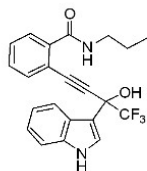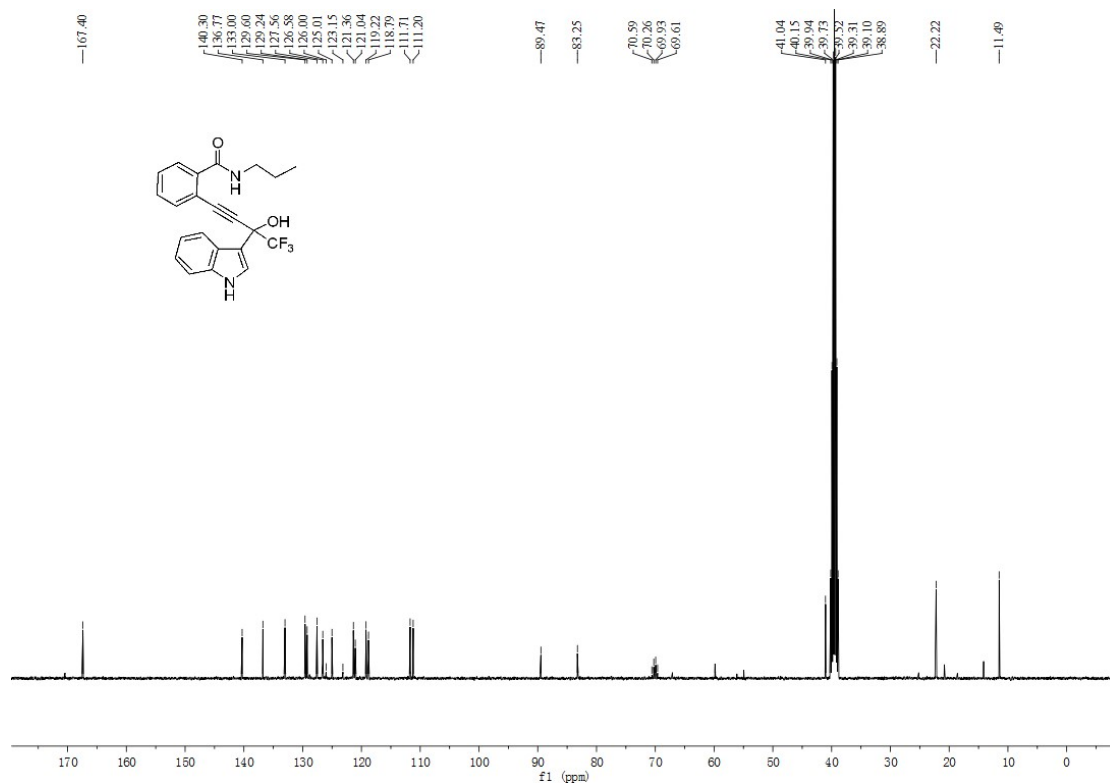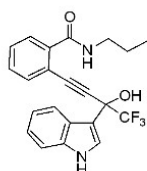

**N-cyclopropyl-2-(4,4,4-trifluoro-3-hydroxy-3-(1H-indol-3-yl)but-1-yn-1-yl)benzamide (11)**

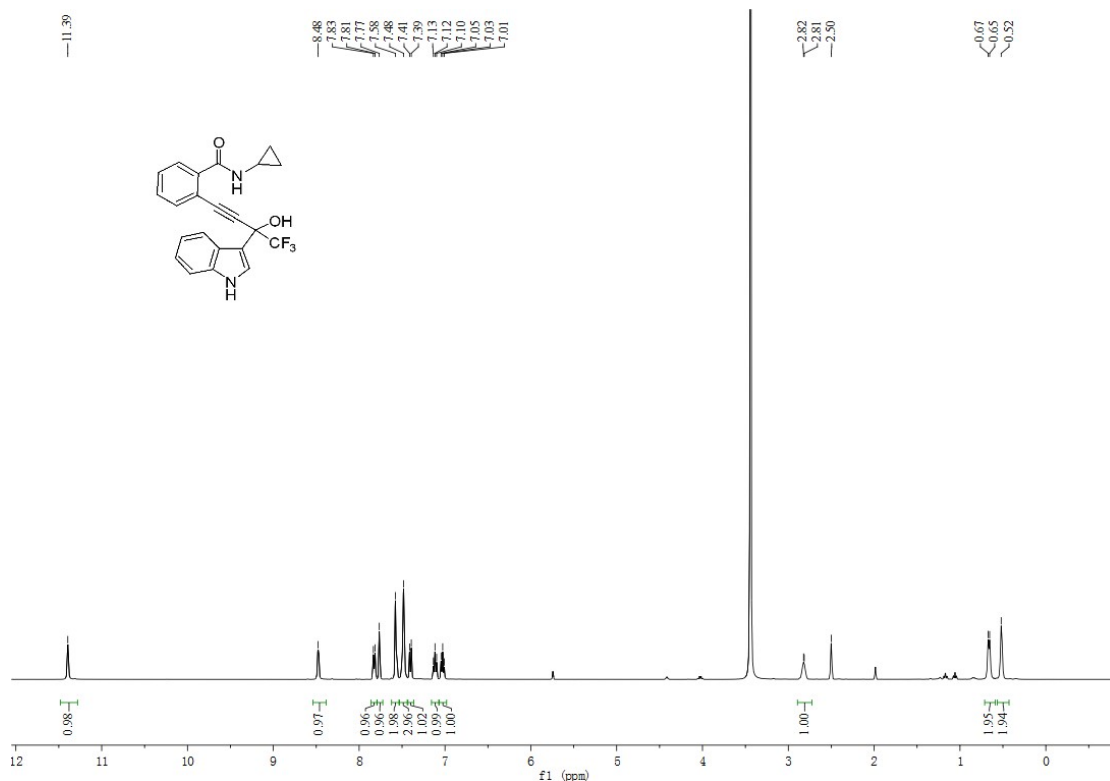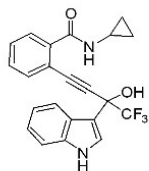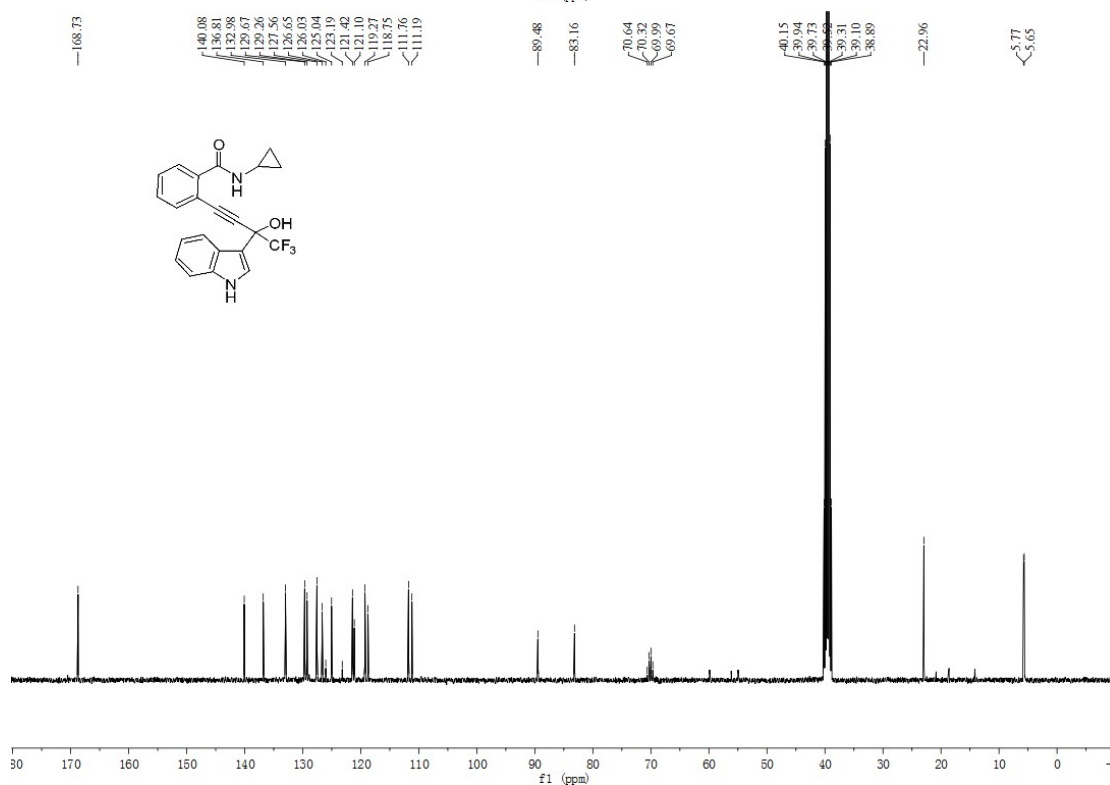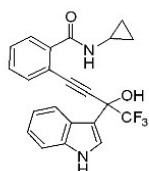

**N-benzyl-2-(4,4,4-trifluoro-3-hydroxy-3-(1H-indol-3-yl)but-1-yn-1-yl)benzamide (1m)**

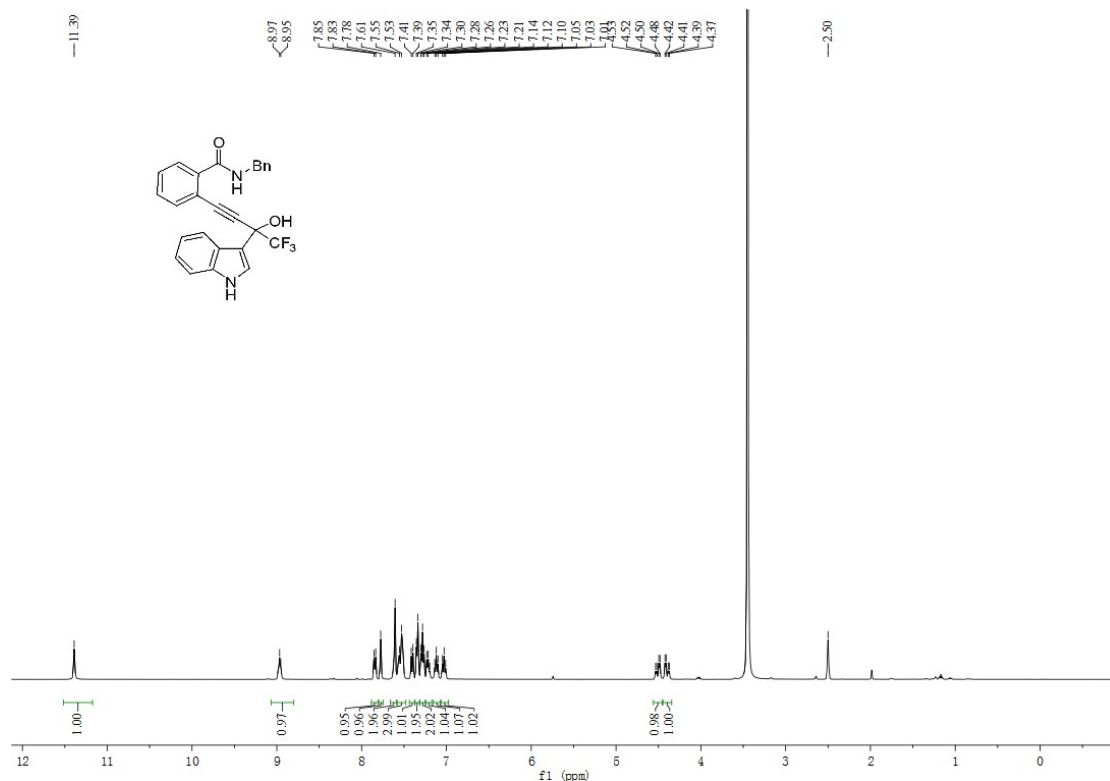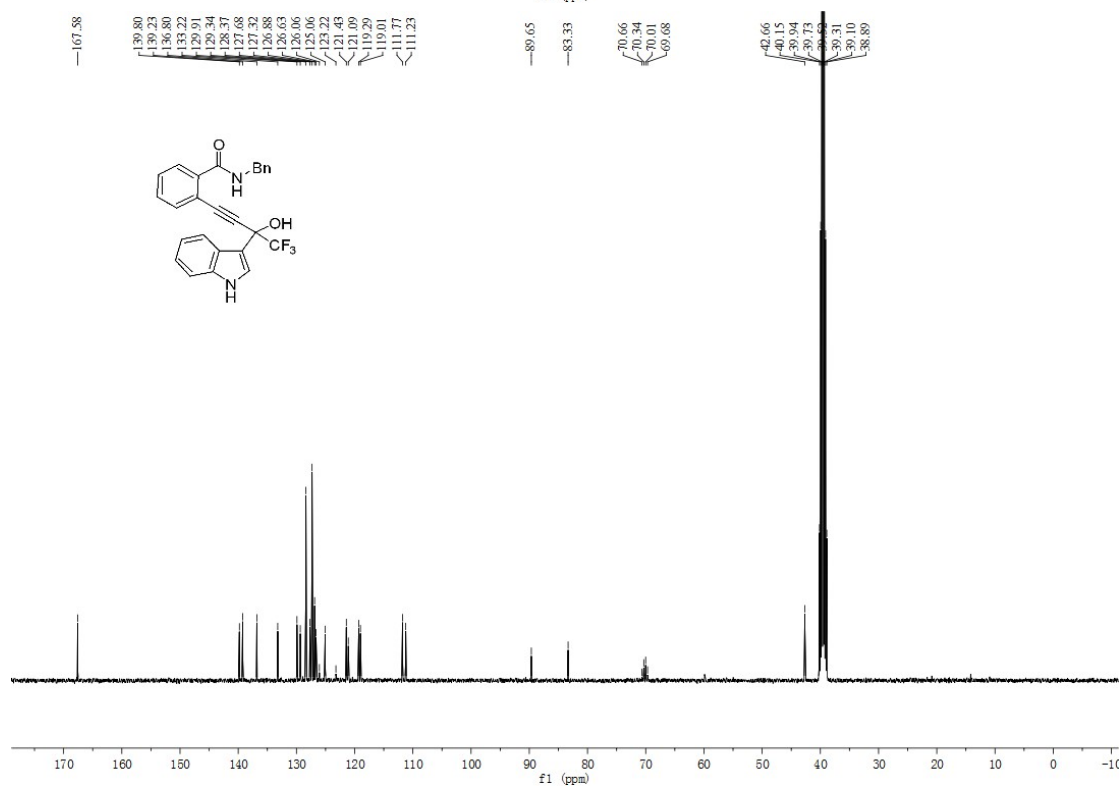

**5-Methoxy-N-phenyl-2-(4,4,4-trifluoro-3-hydroxy-3-(1H-indol-3-yl)but-1-yn-1-yl)benzamide (1n)**

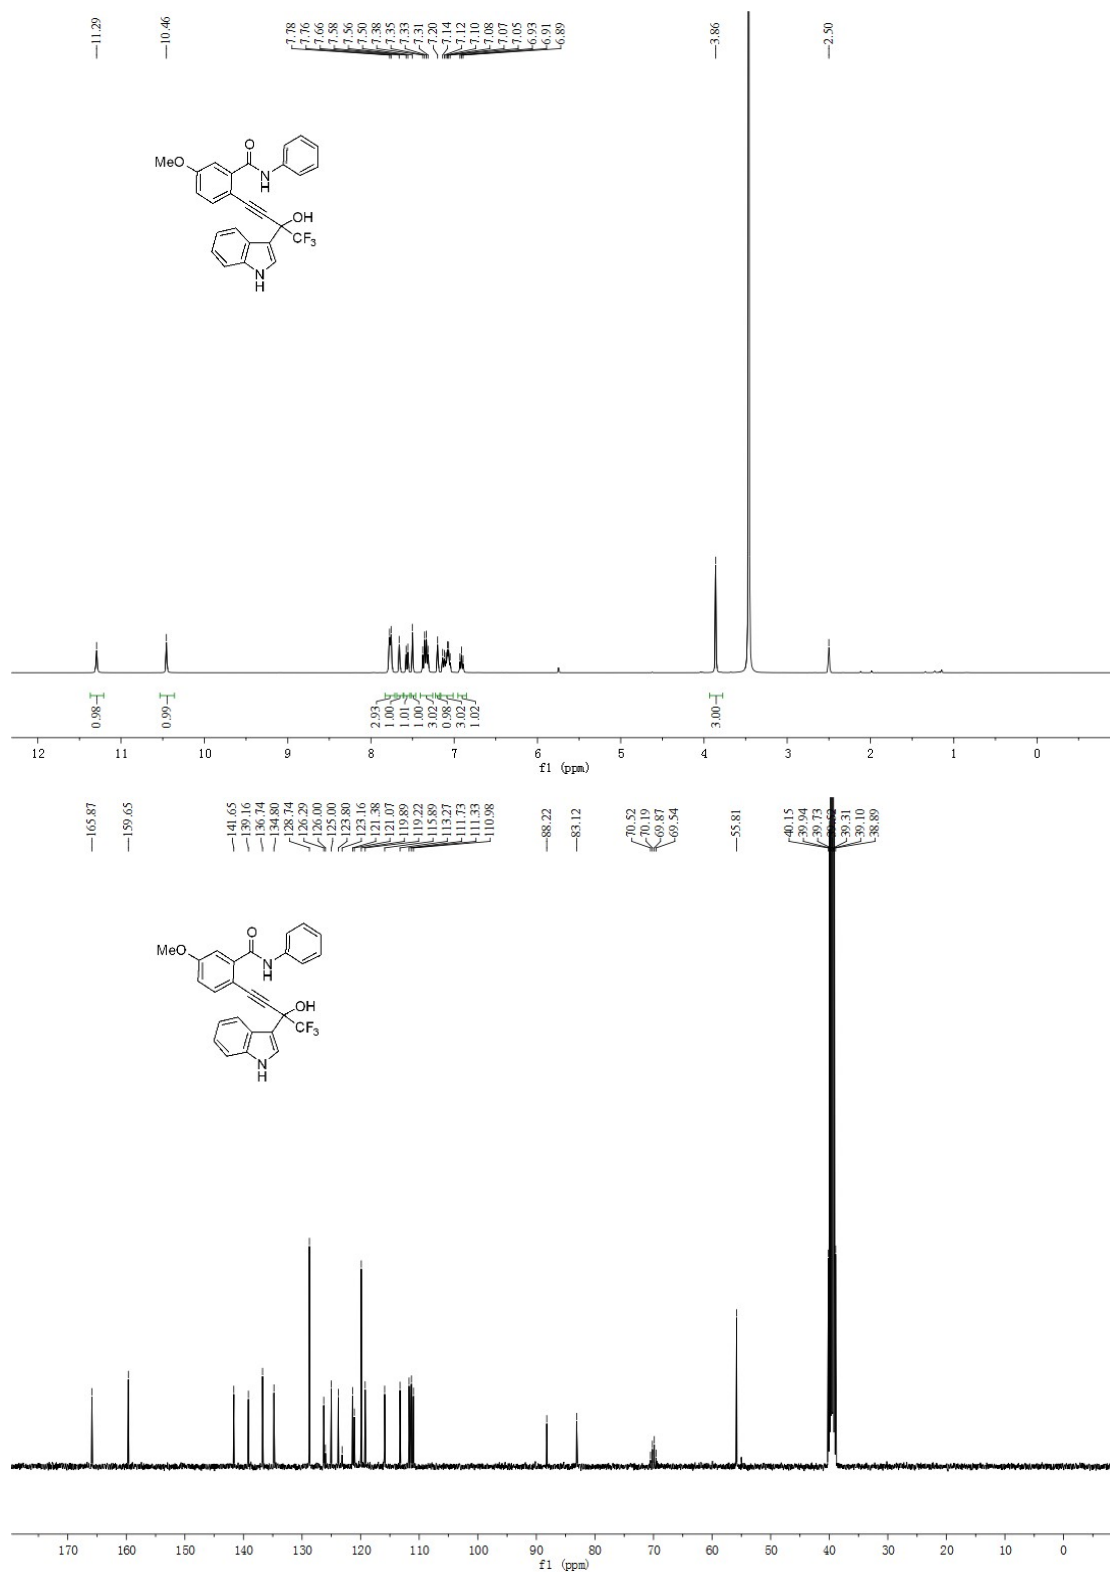

**5-Bromo-N-phenyl-2-(4,4,4-trifluoro-3-hydroxy-3-(1H-indol-3-yl)but-1-yn-1-yl)benzamide (1o)**

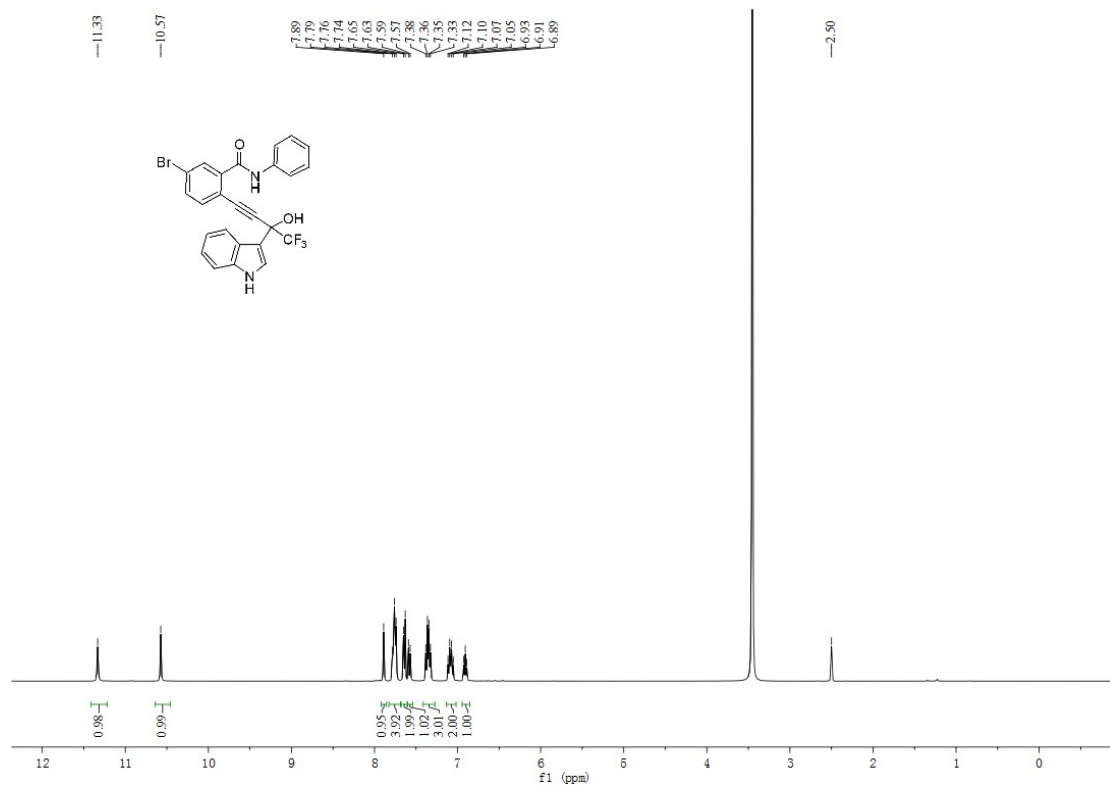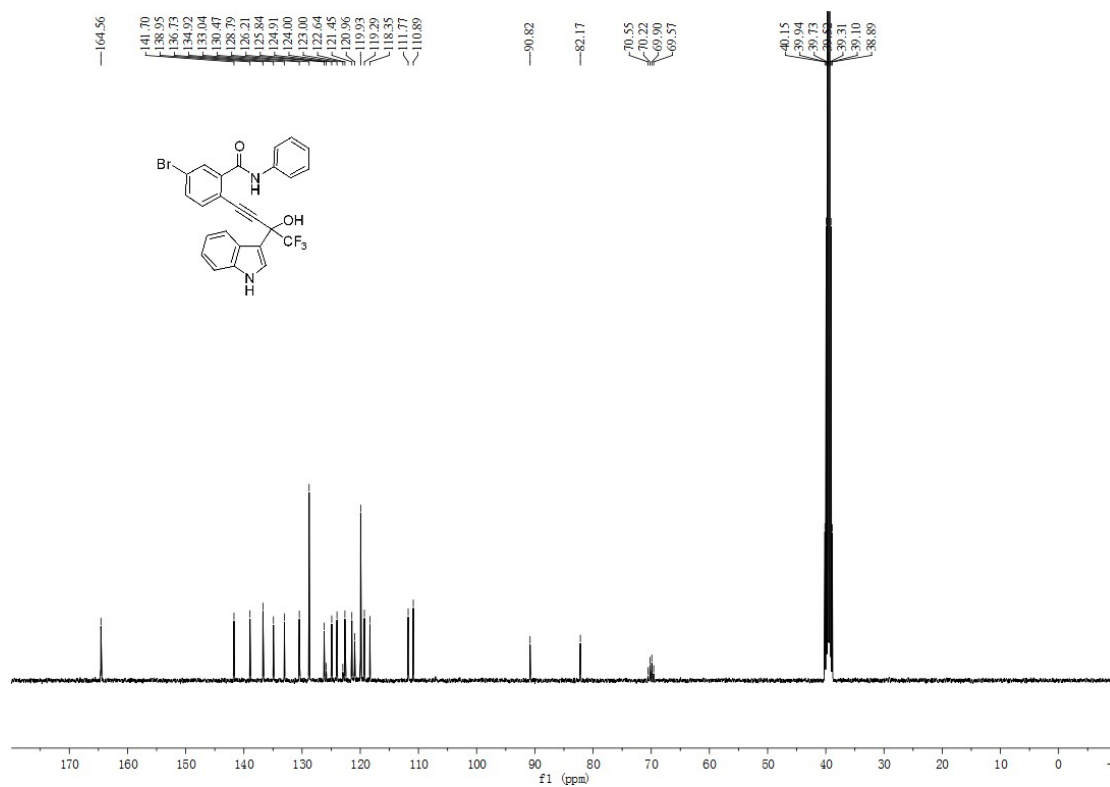

**5-Methyl-N-phenyl-2-(4,4,4-trifluoro-3-hydroxy-3-(1H-indol-3-yl)but-1-yn-1-yl)benzamide (1p)**

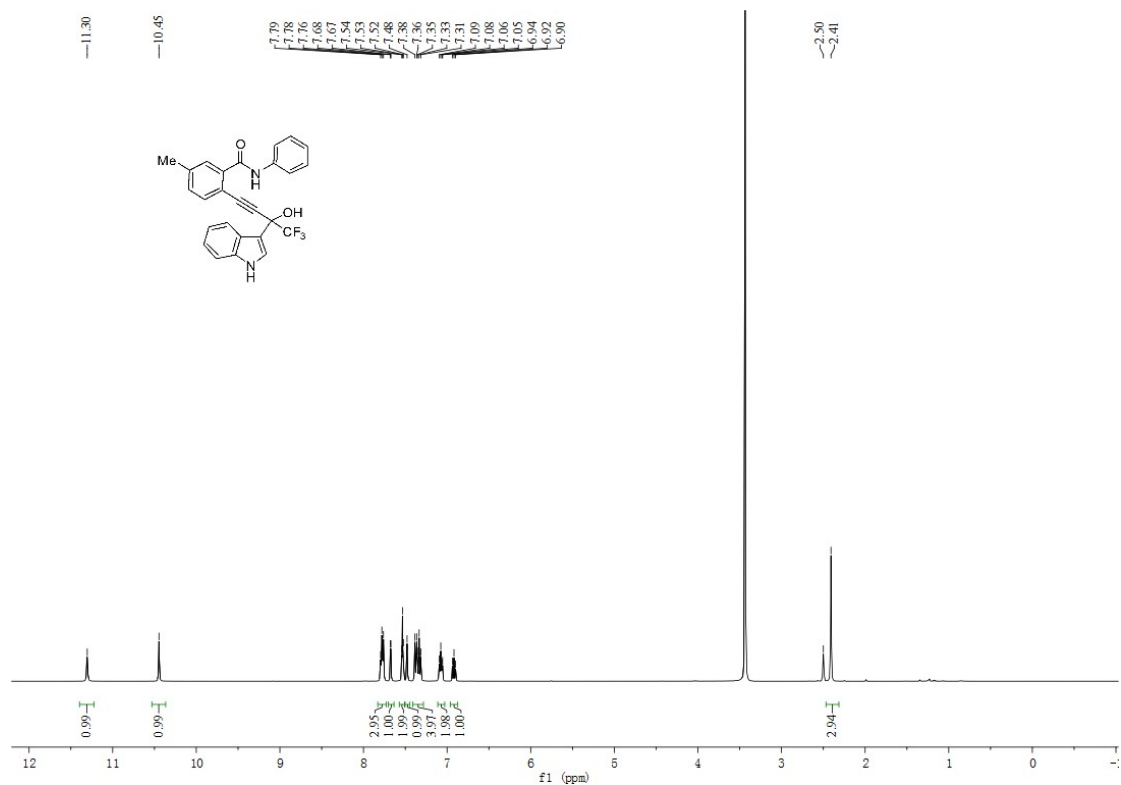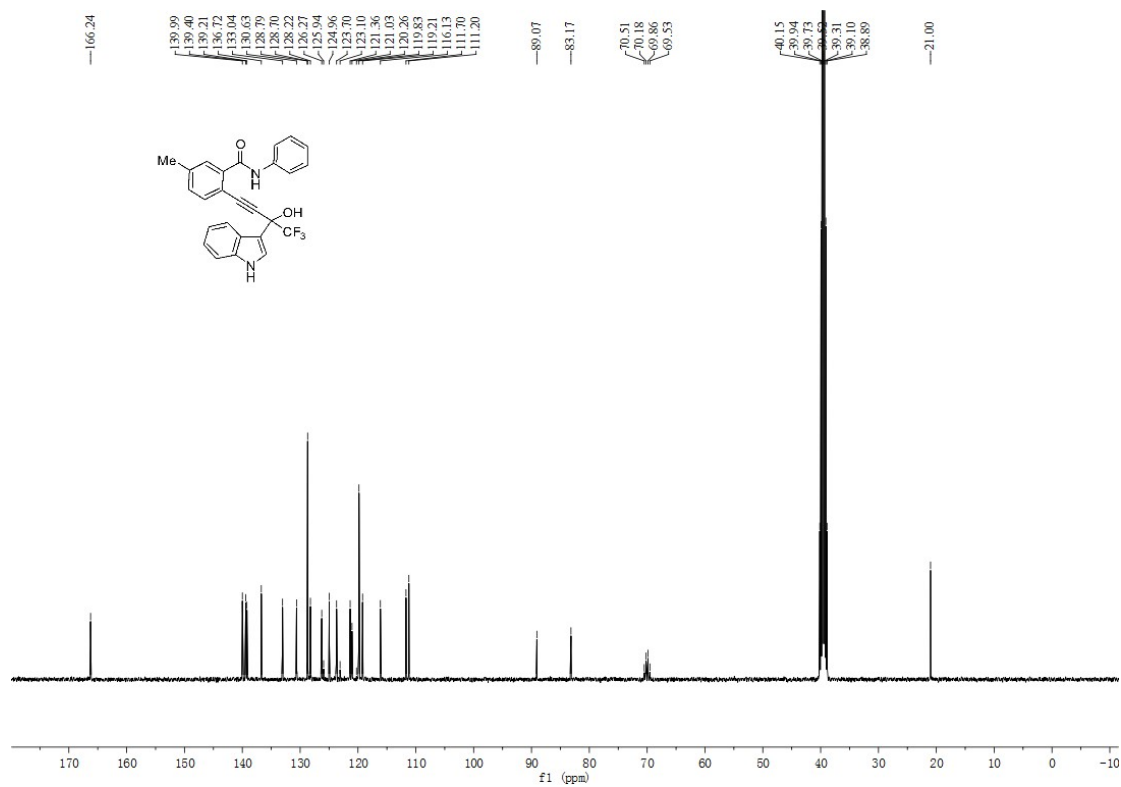

**5-Fluoro-N-phenyl-2-(4,4,4-trifluoro-3-hydroxy-3-(1H-indol-3-yl)but-1-yn-1-yl)benzamide (1q)**

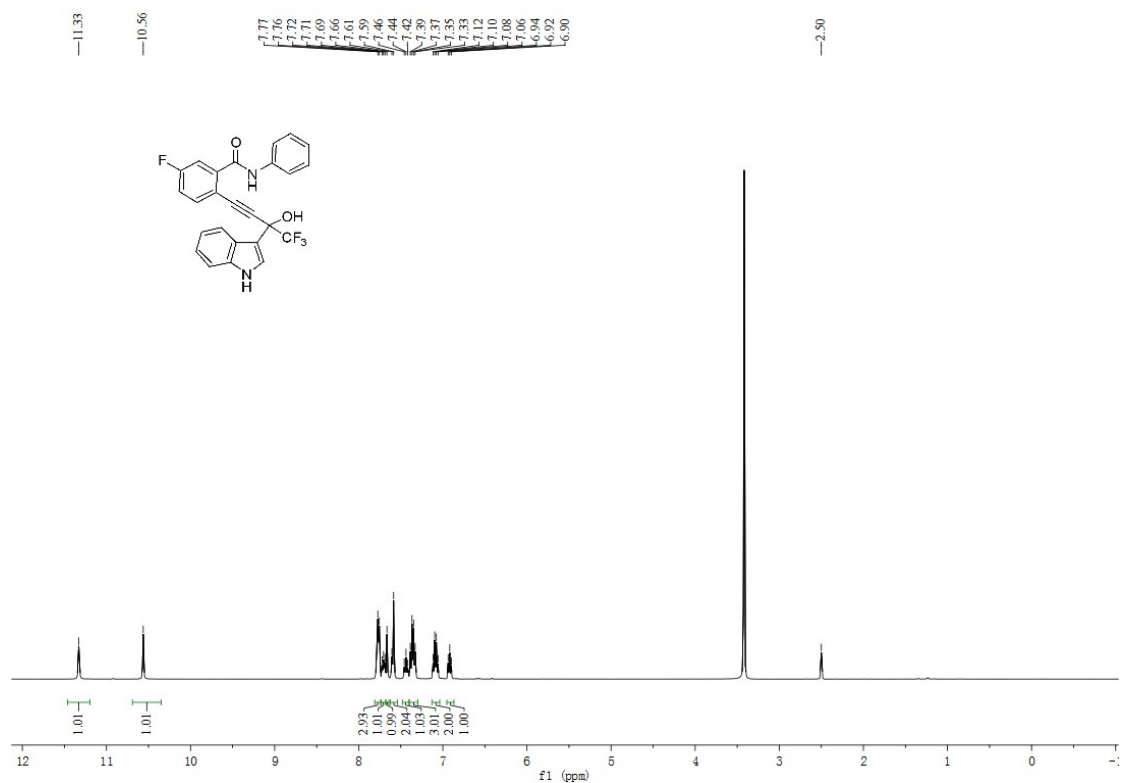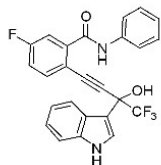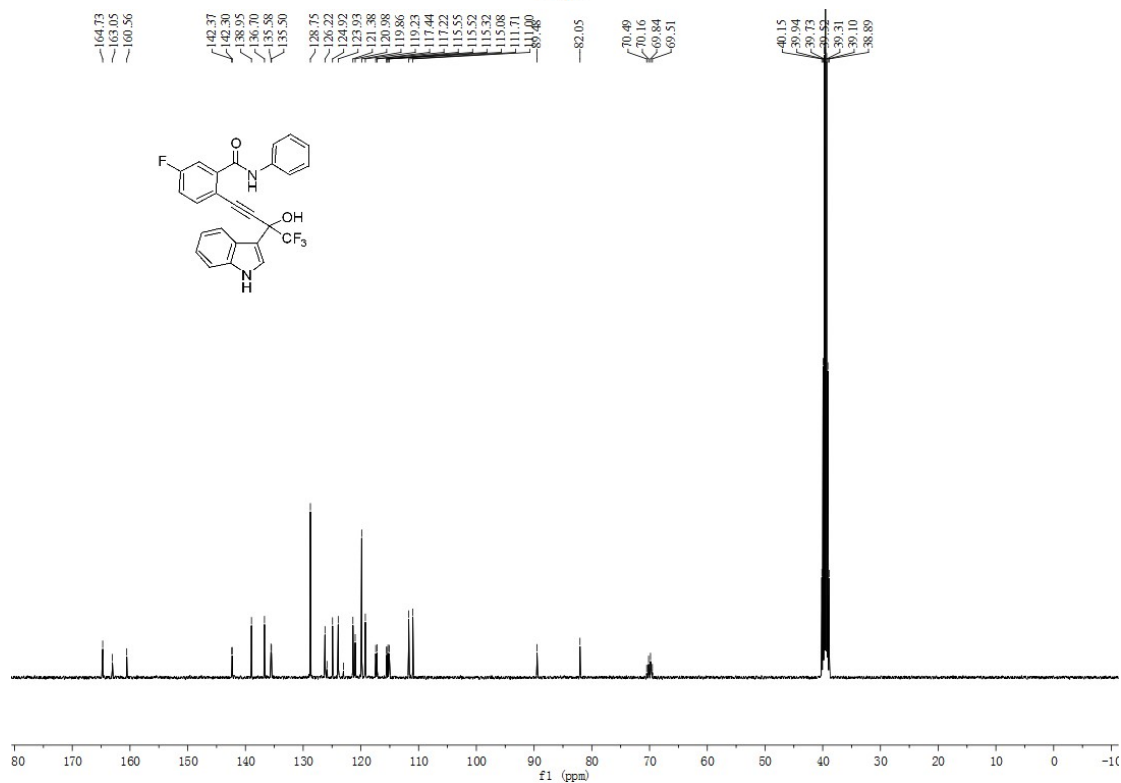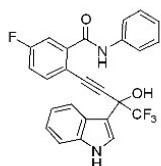

**5-Chloro-N-phenyl-2-(4,4,4-trifluoro-3-hydroxy-3-(1H-indol-3-yl)but-1-yn-1-yl)benzamide (1r)**

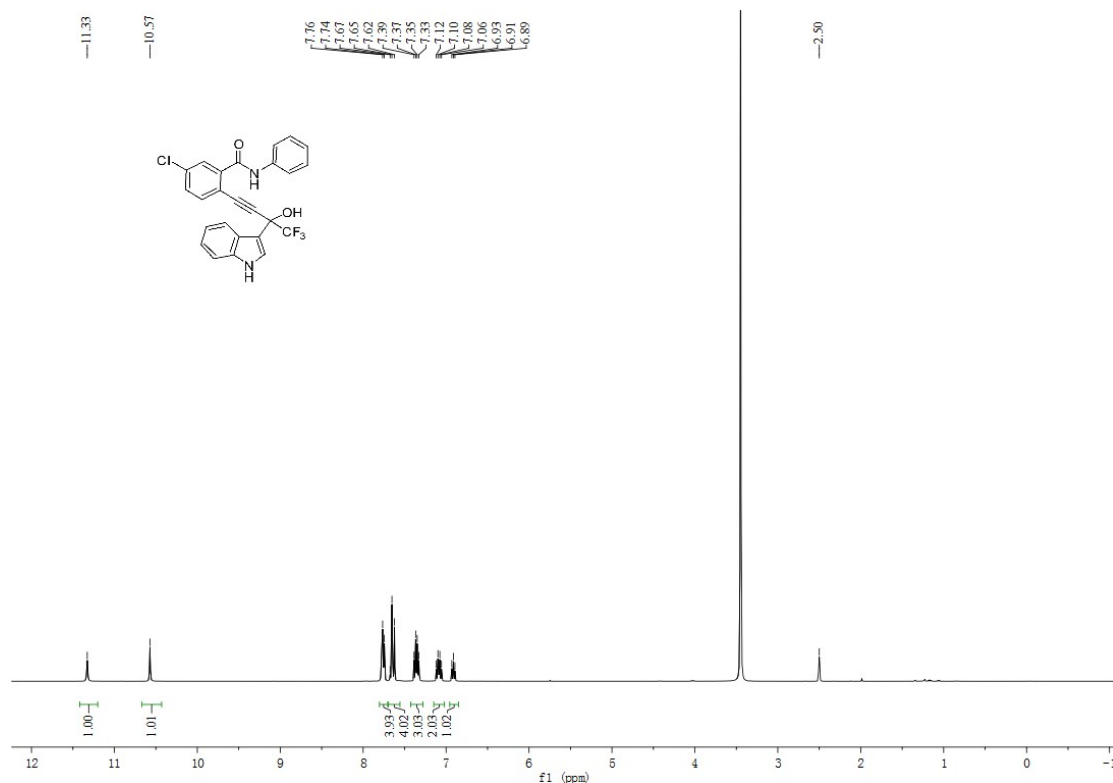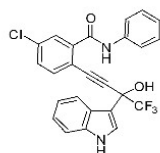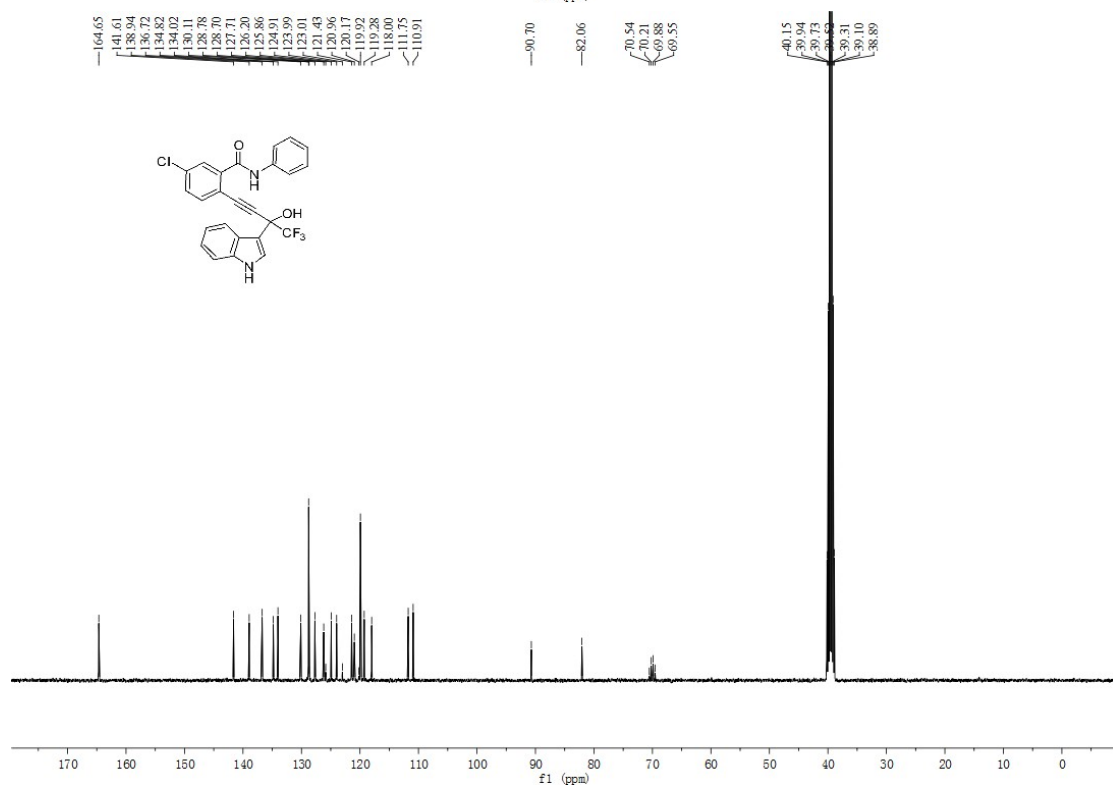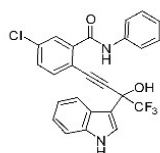



**4-Bromo-N-phenyl-2-(4,4,4-trifluoro-3-hydroxy-3-(1H-indol-3-yl)but-1-yn-1-yl)benzamide (1s)**

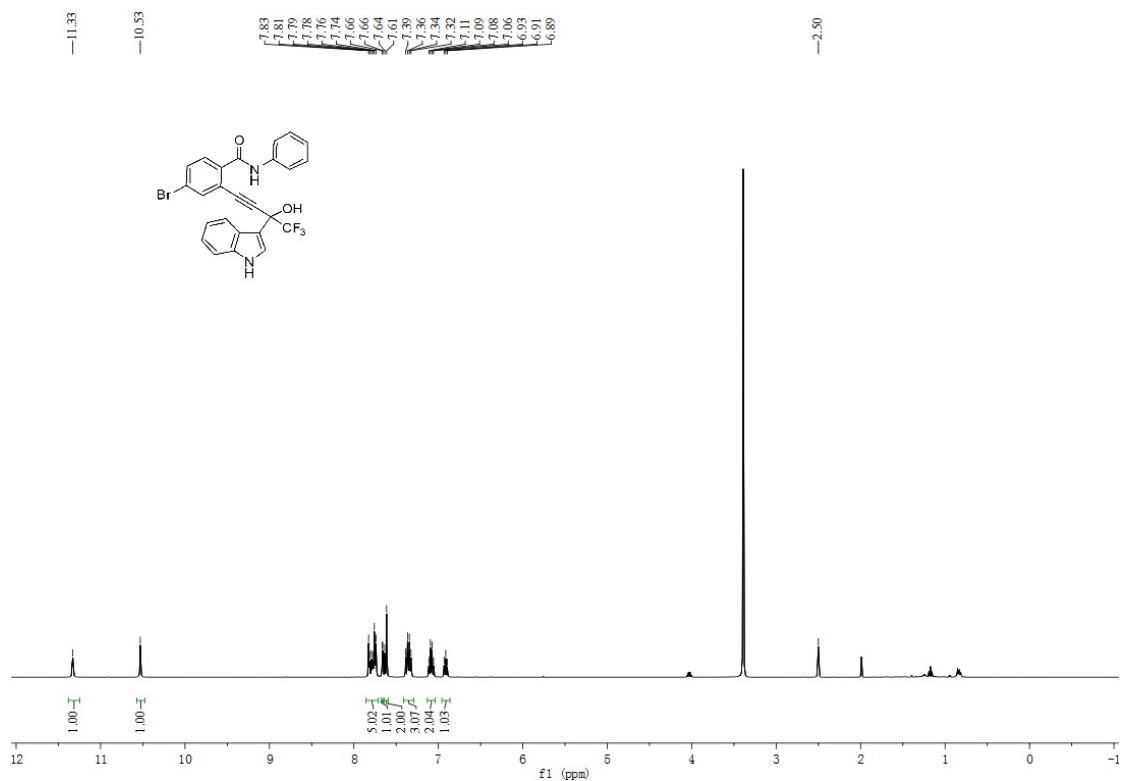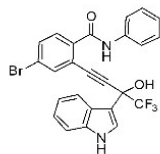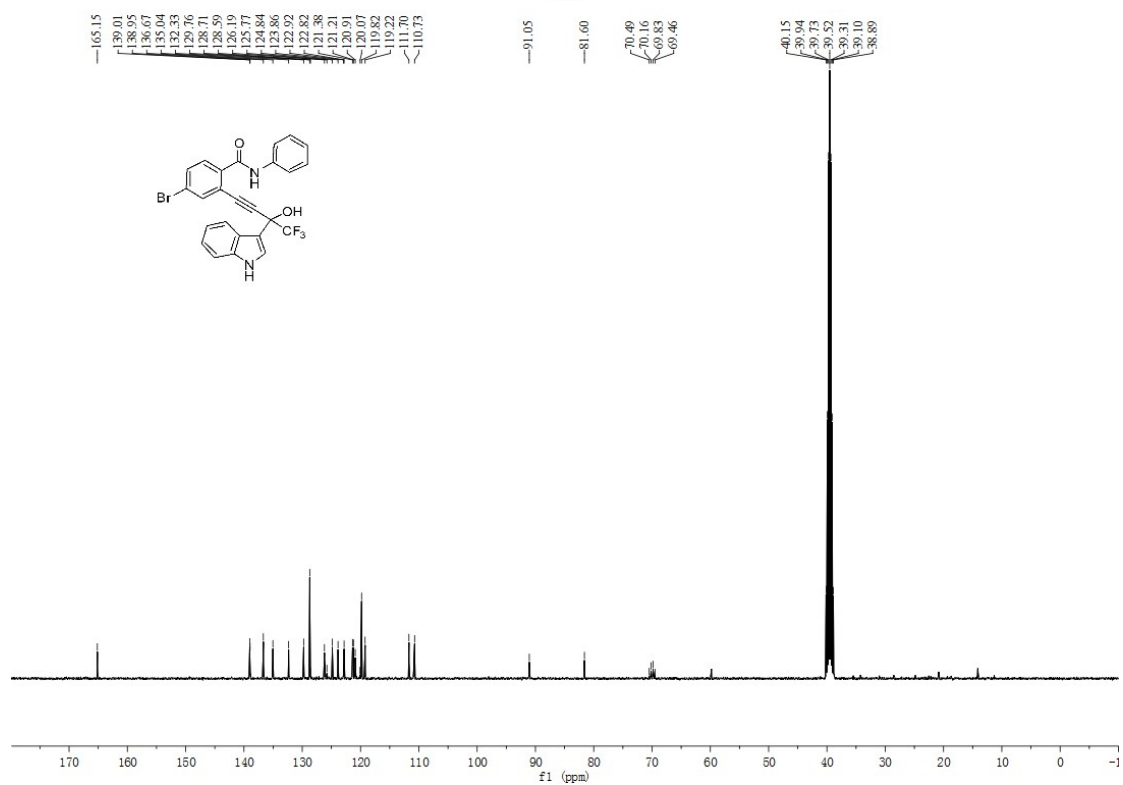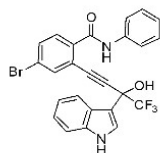

**4-Chloro-N-phenyl-2-(4,4,4-trifluoro-3-hydroxy-3-(1H-indol-3-yl)but-1-yn-1-yl)benzamide (1t)**

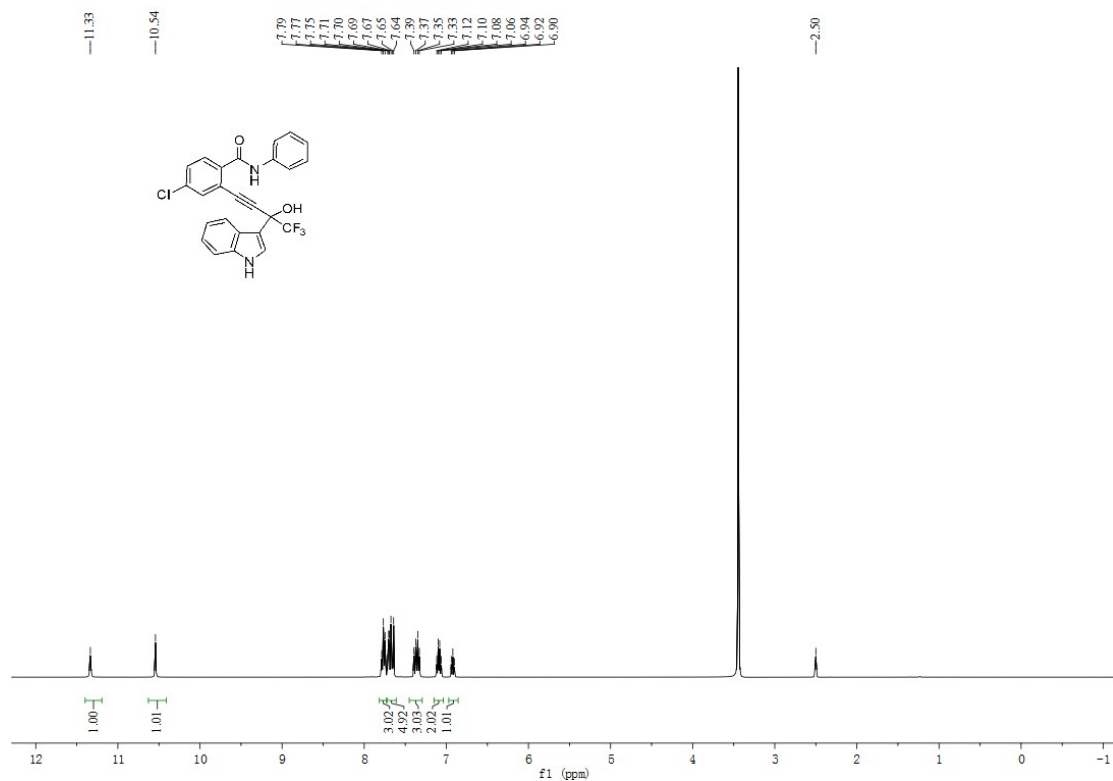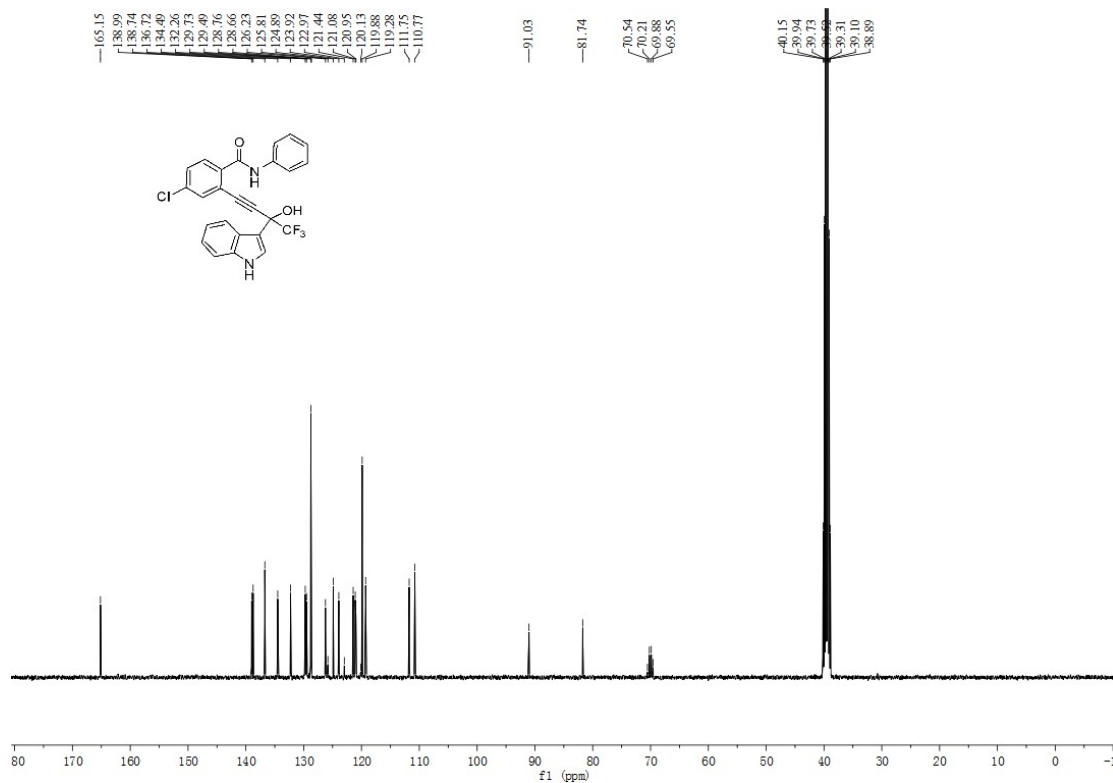

**2-(3-(5-Chloro-1H-indol-3-yl)-4,4,4-trifluoro-3-hydroxybut-1-yn-1-yl)-N-phenylbenzamide (1u)**

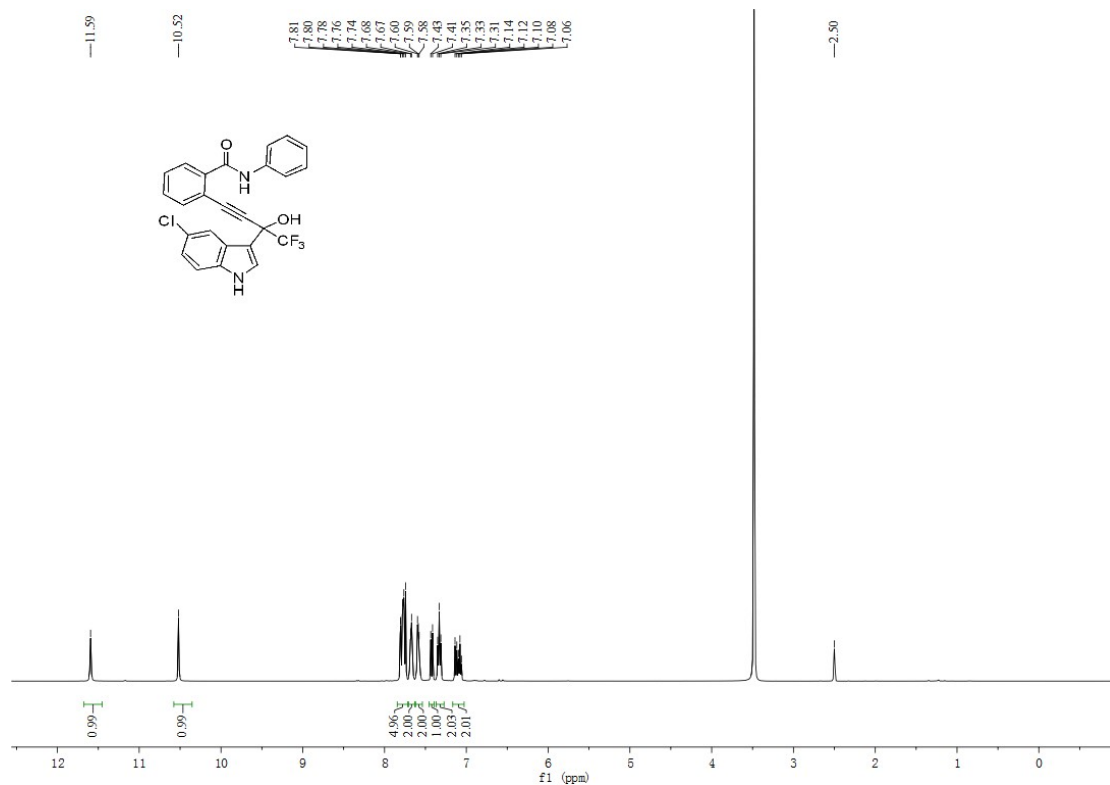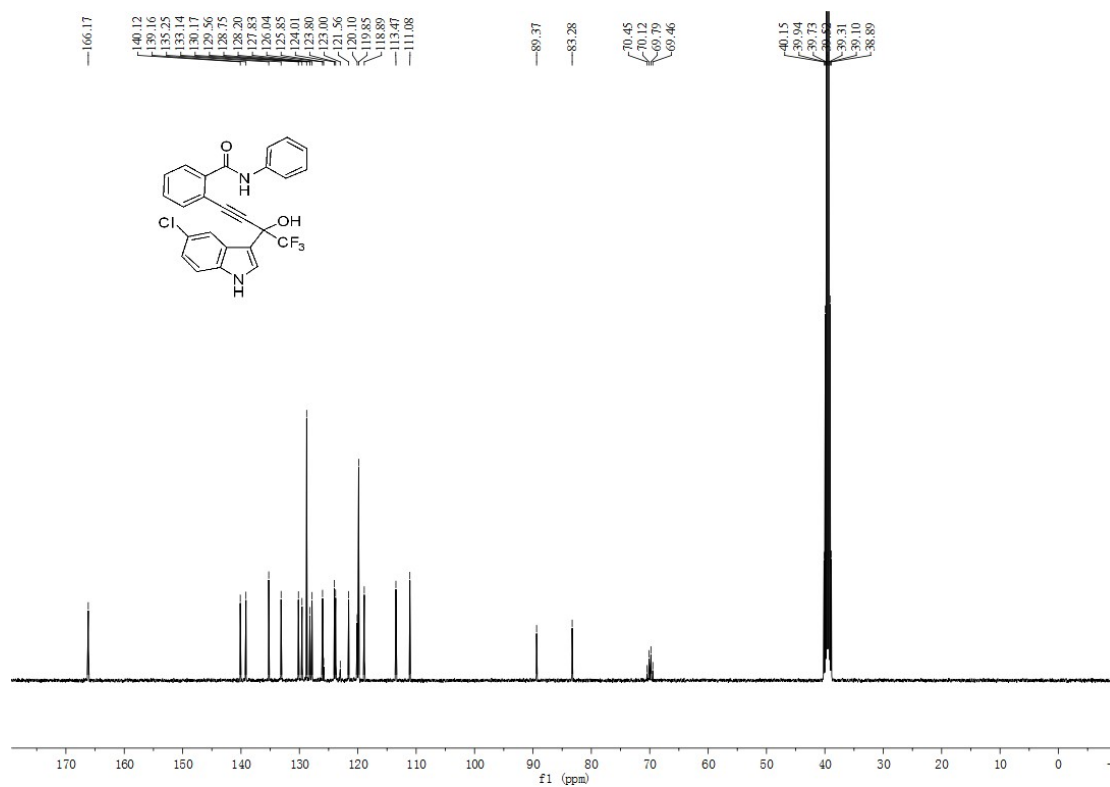

**2-(3-(5-Bromo-1H-indol-3-yl)-4,4,4-trifluoro-3-hydroxybut-1-yn-1-yl)-N-phenylbenzamide (1v)**

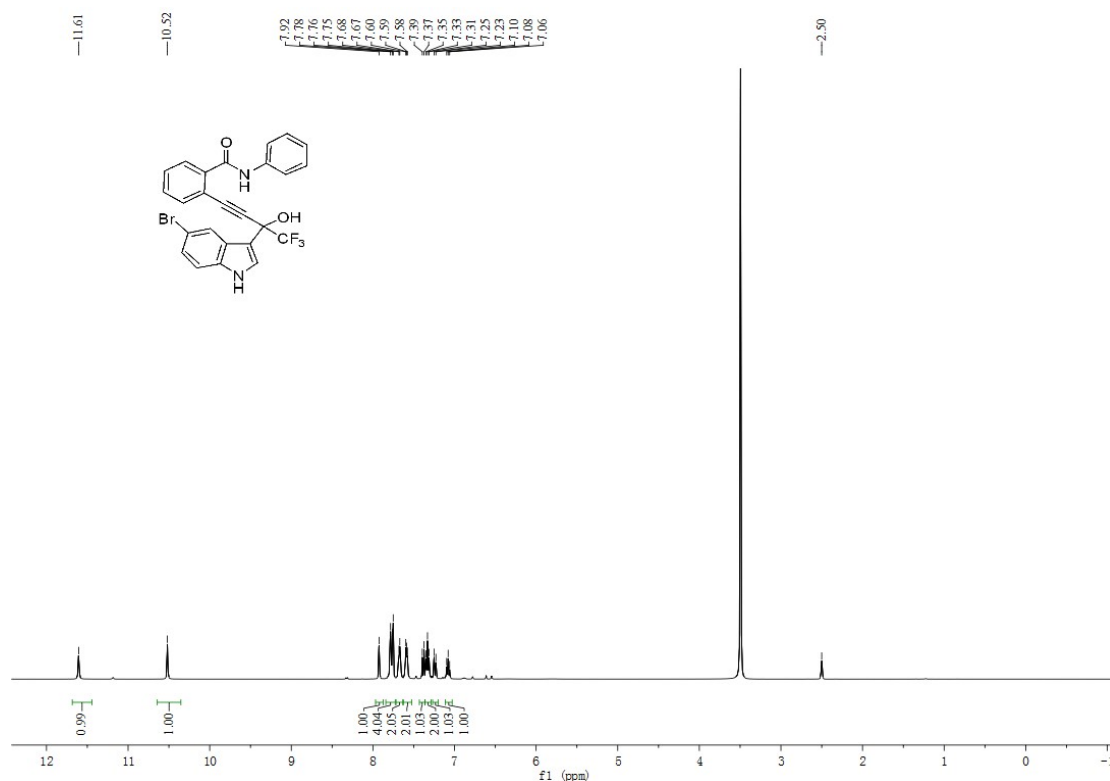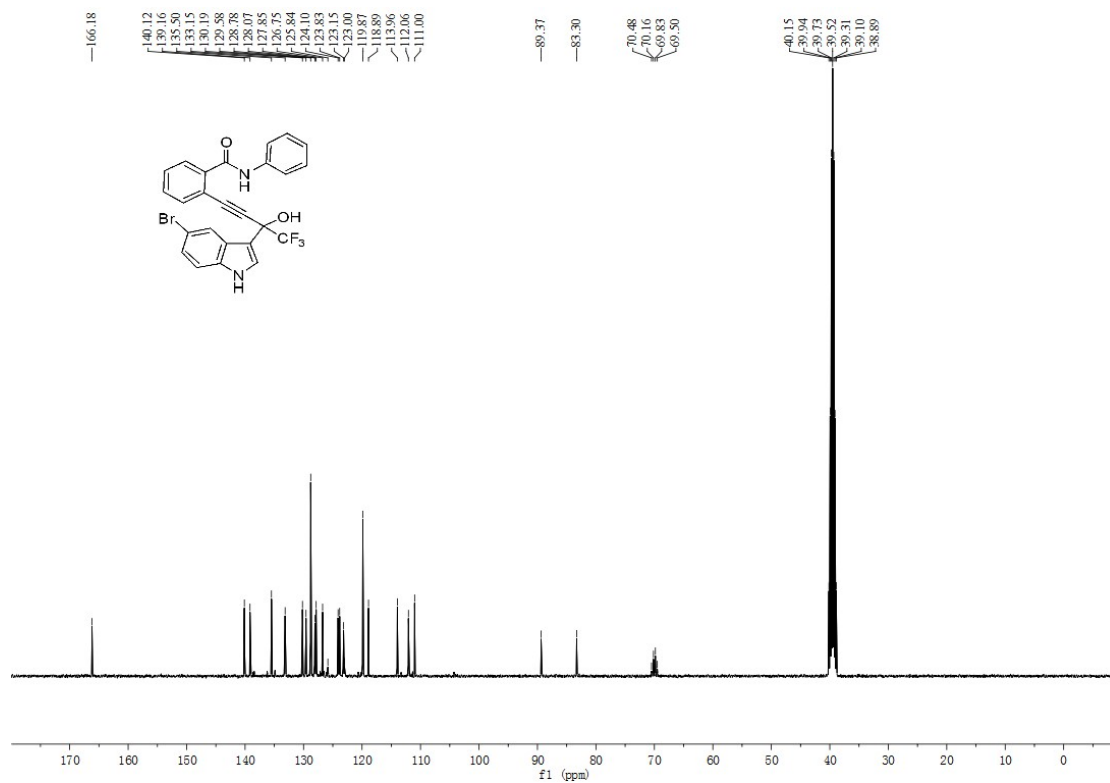

**N-phenyl-2-(4,4,4-trifluoro-3-hydroxy-3-(6-methyl-1H-indol-3-yl)but-1-yn-1-yl)benzamide (1w)**

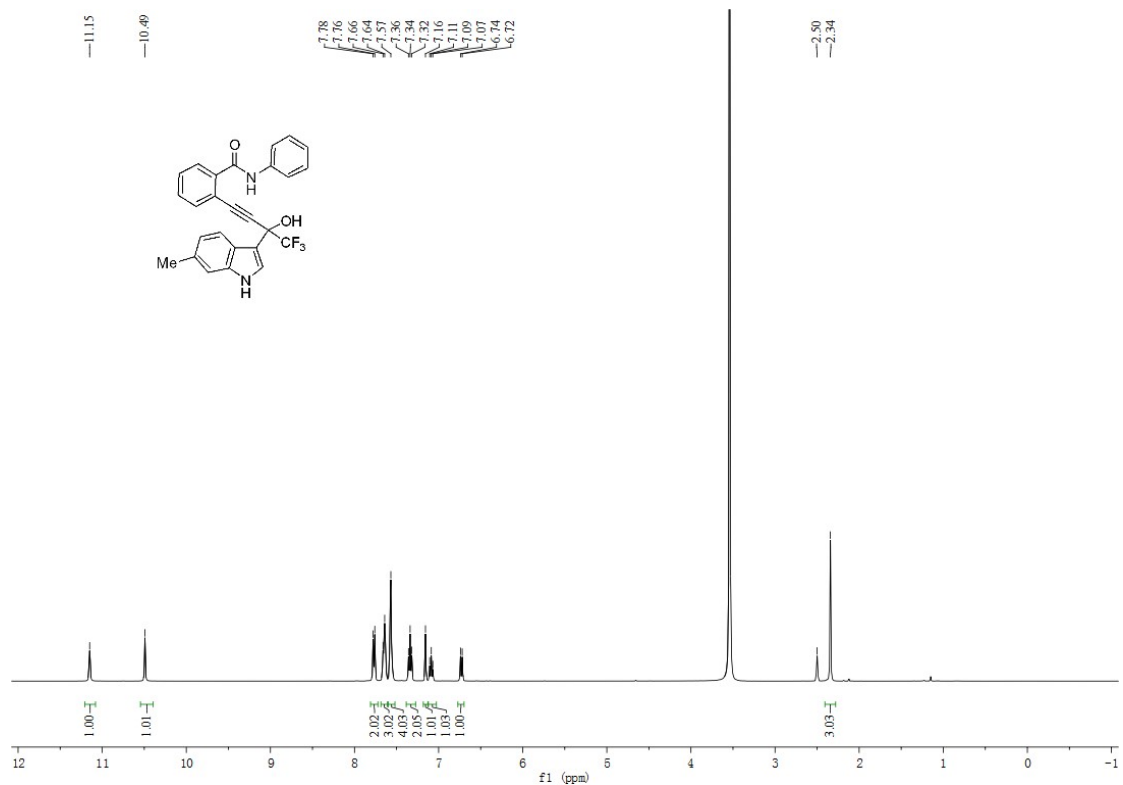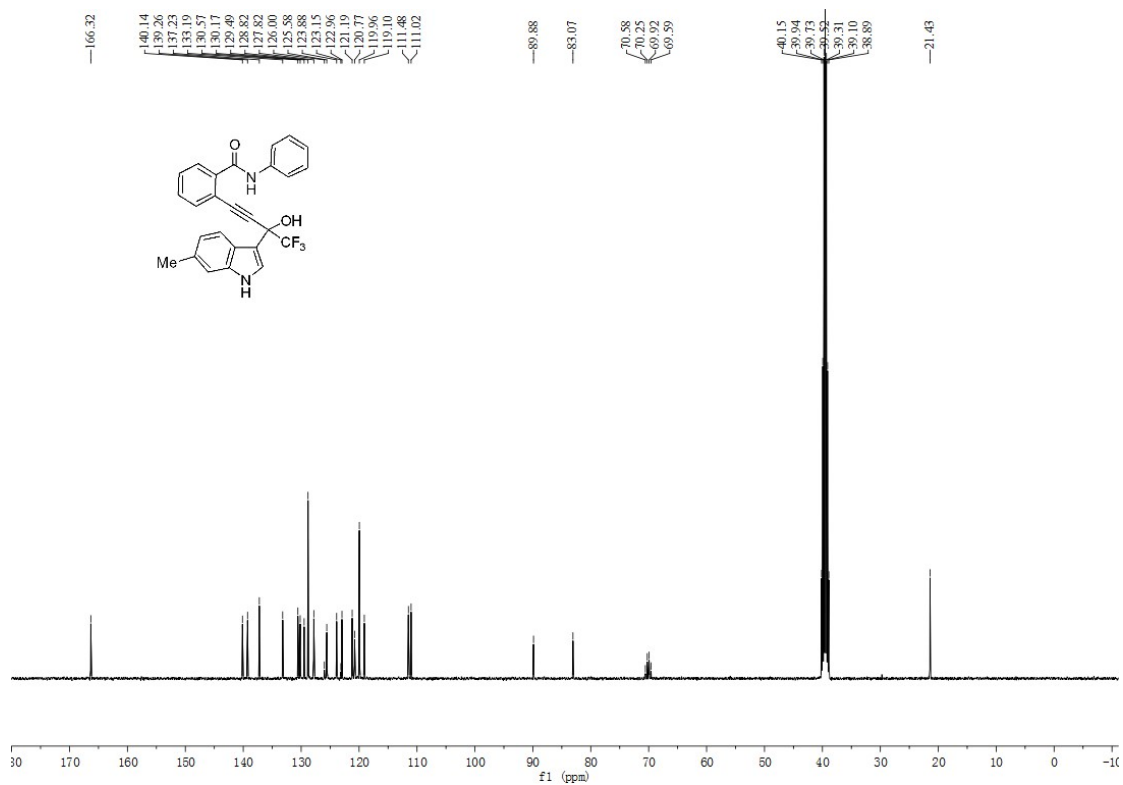

**N-phenyl-2-(4,4,4-trifluoro-3-hydroxy-3-(7-methoxy-1H-indol-3-yl)but-1-yn-1-yl)benzamide (1x)**

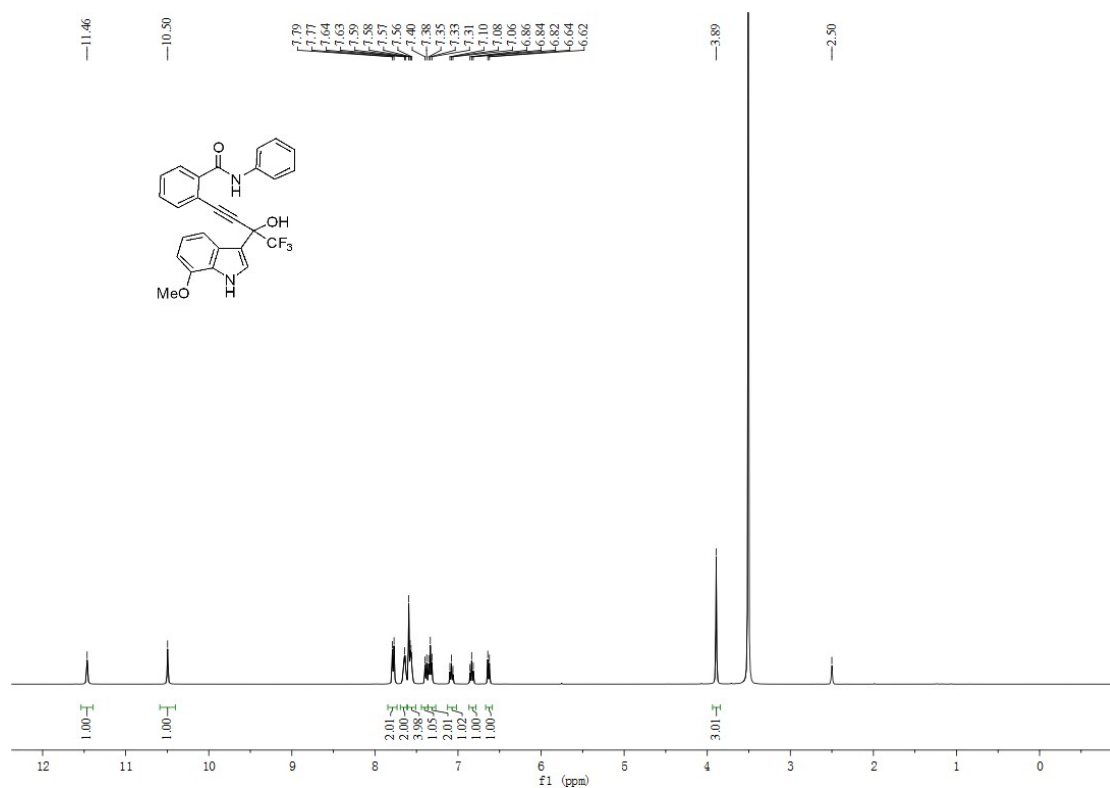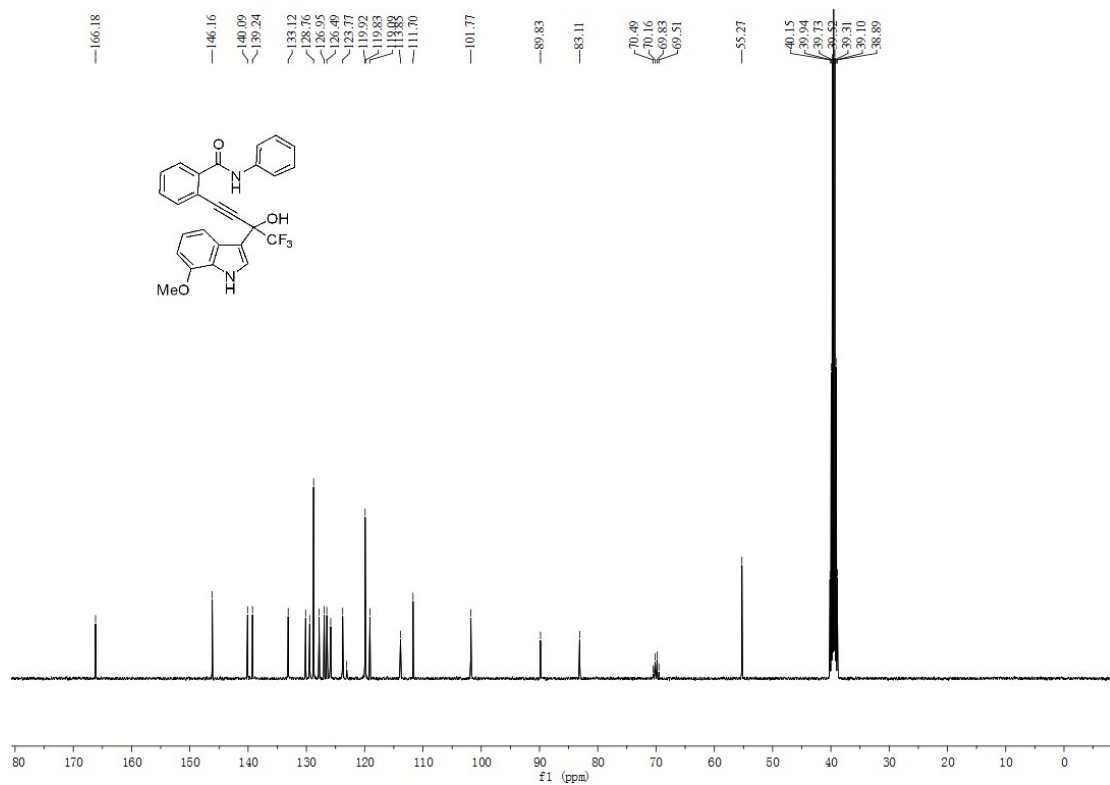

**N-phenyl-2-(4,4,4-trifluoro-3-hydroxy-3-(1-methyl-1H-indol-3-yl)but-1-yn-1-yl)benzamide (3)**

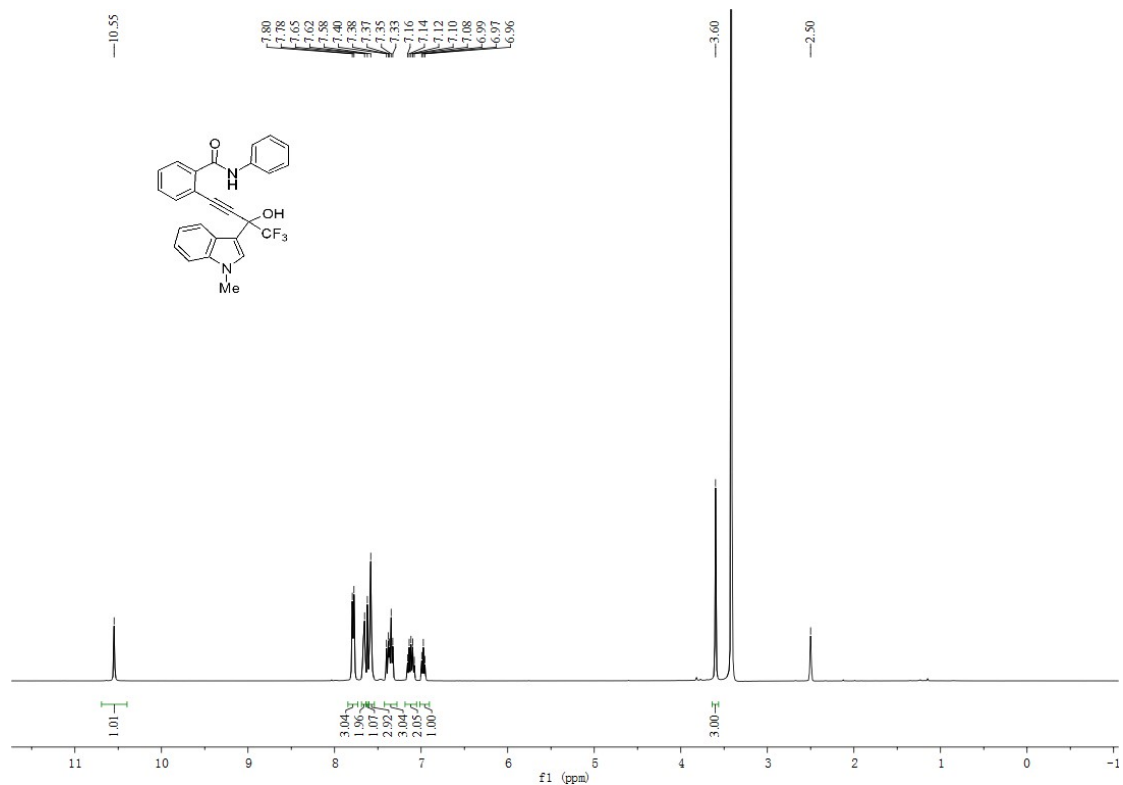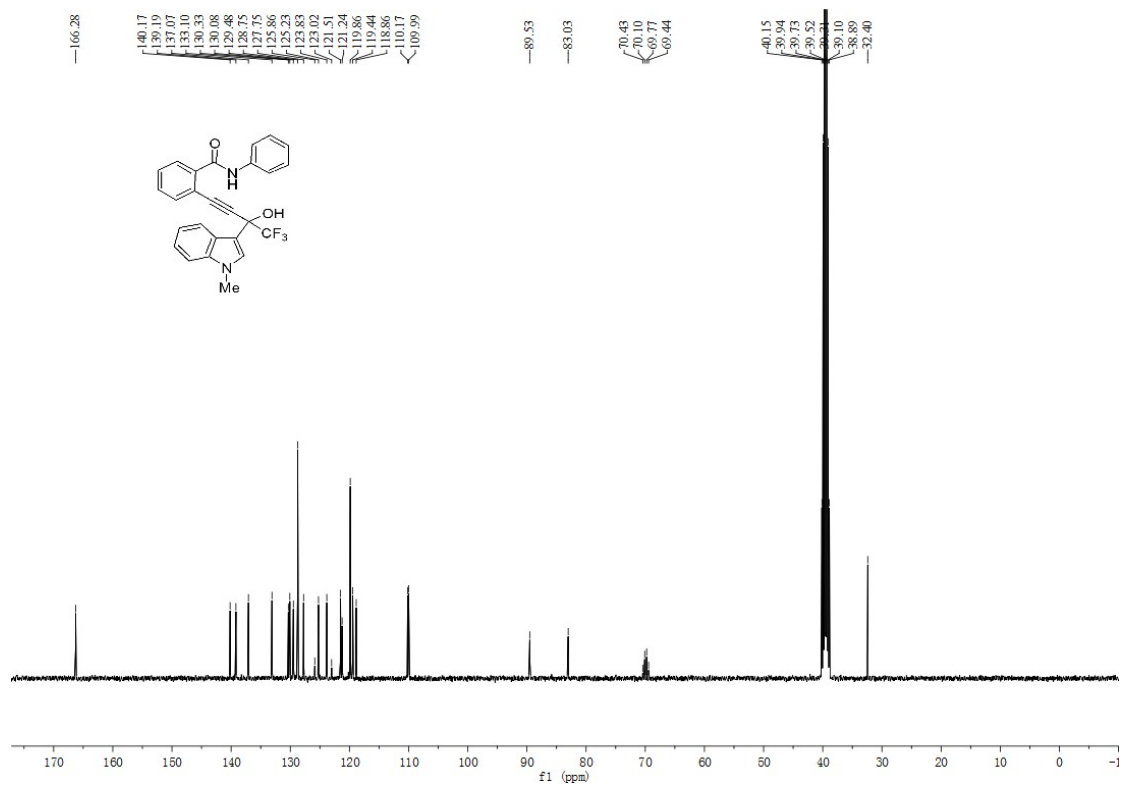

**N-phenyl-2-(4,4,4-trifluoro-3-hydroxy-3-(2-methyl-1H-indol-3-yl)but-1-yn-1-yl)benzamide (5)**

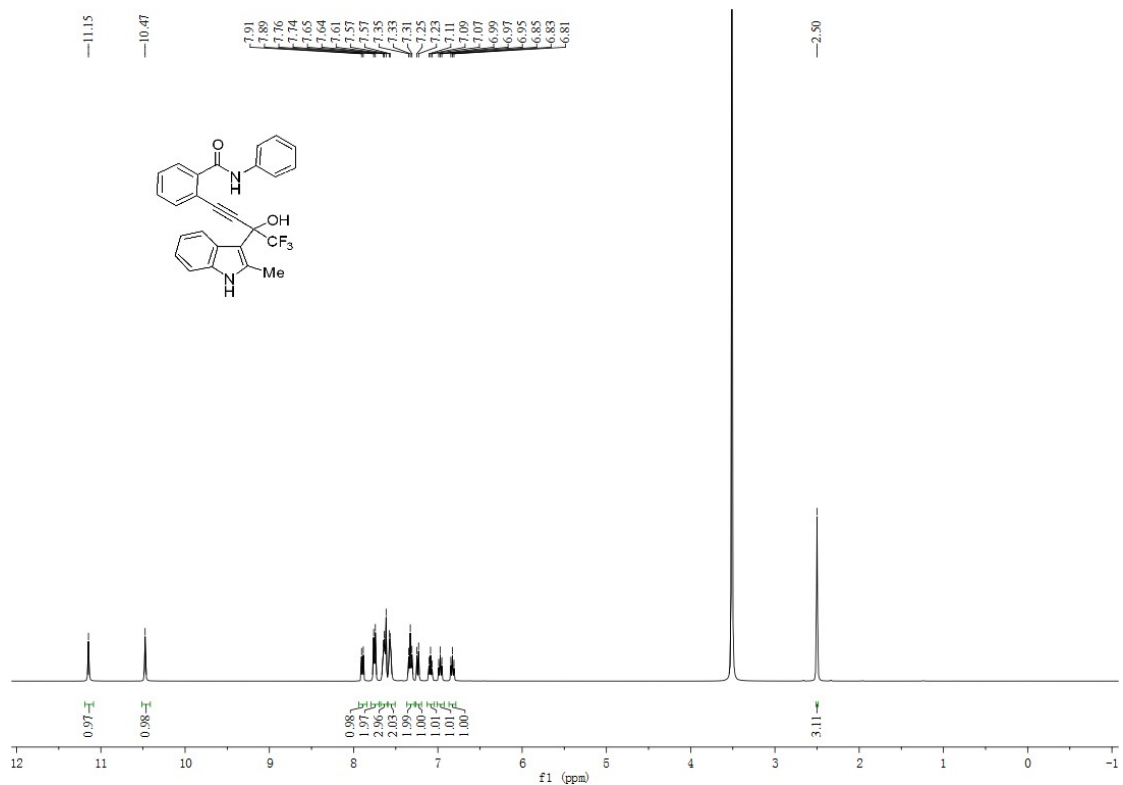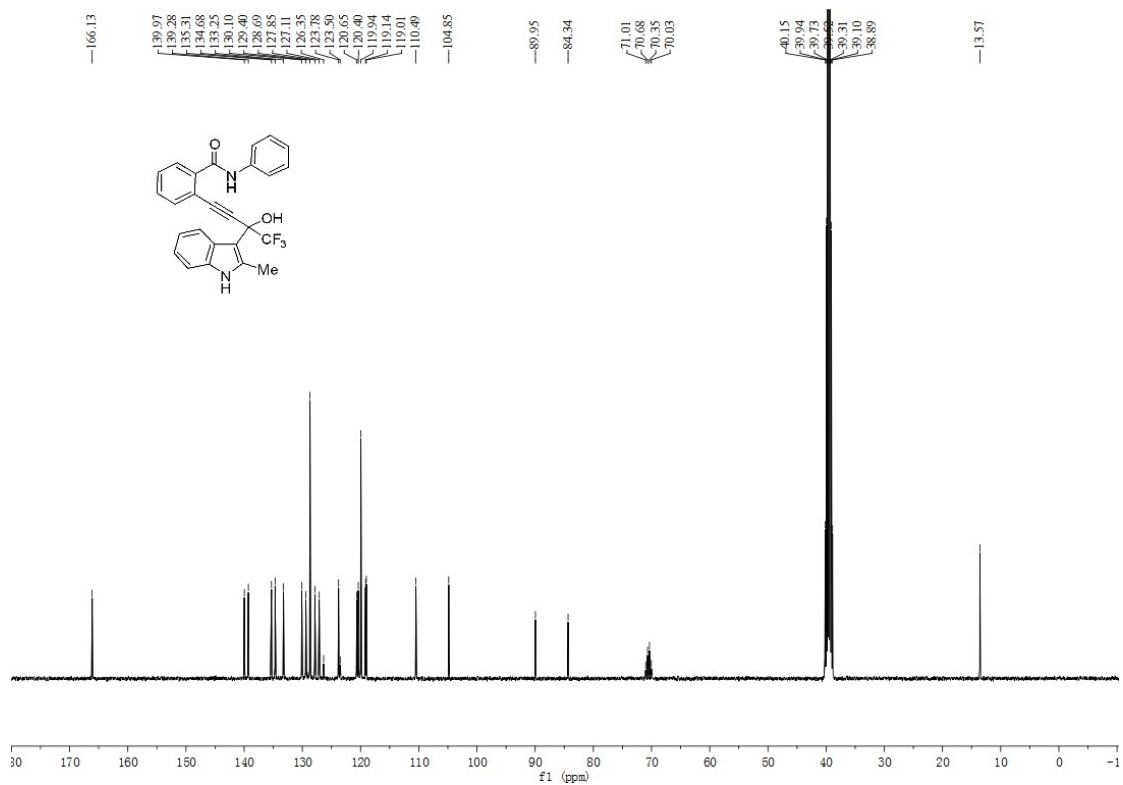



**(R)-2'-phenyl-1-(trifluoromethyl)-4H-spiro[cyclopenta[b]indole-3,1'-isoindolin]-3'-one (2a)**

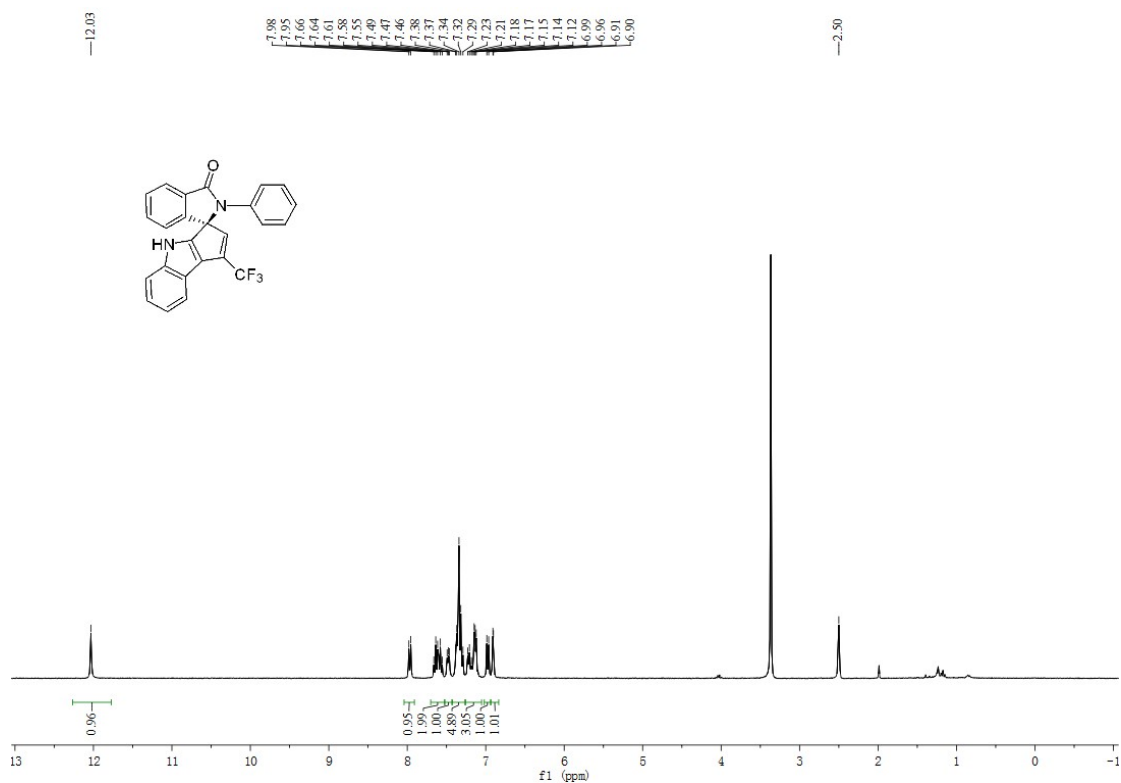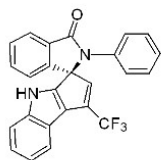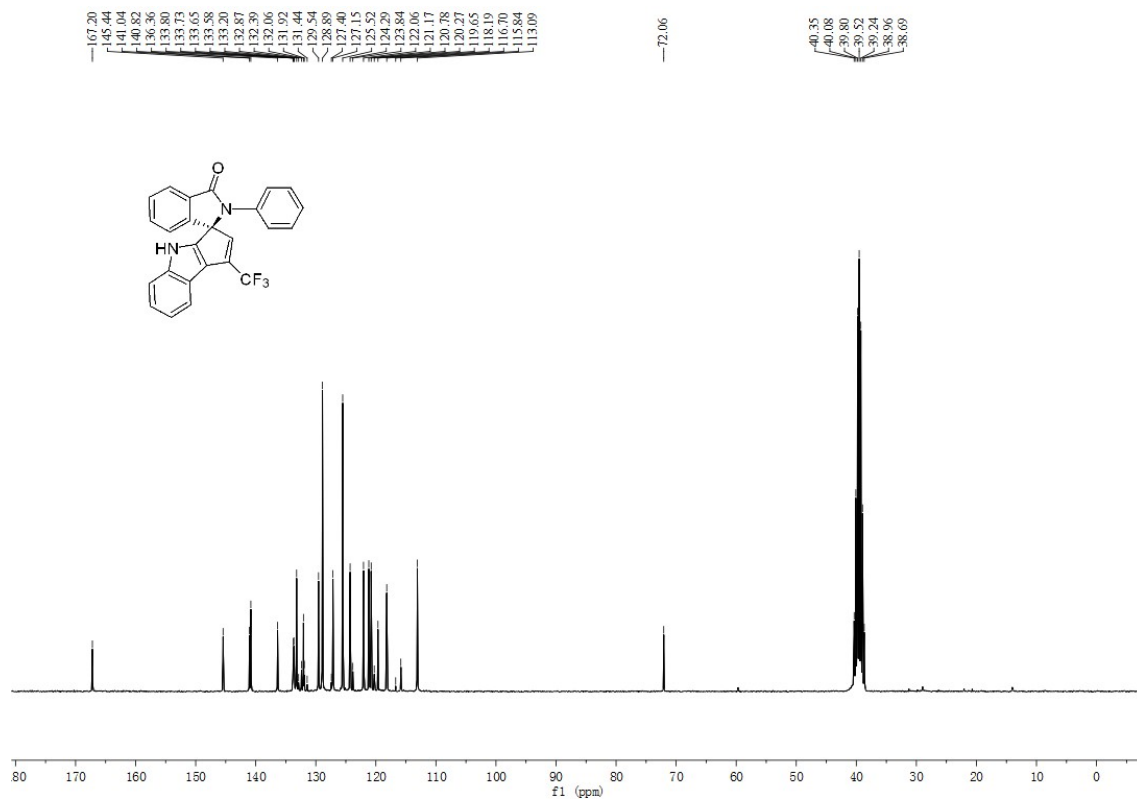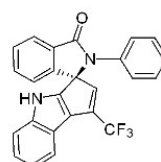

**(R)-2'-(2-methoxyphenyl)-1-(trifluoromethyl)-4H-spiro[cyclopenta[b]indole-3,1'-isoindolin]-3'-one (2b)**

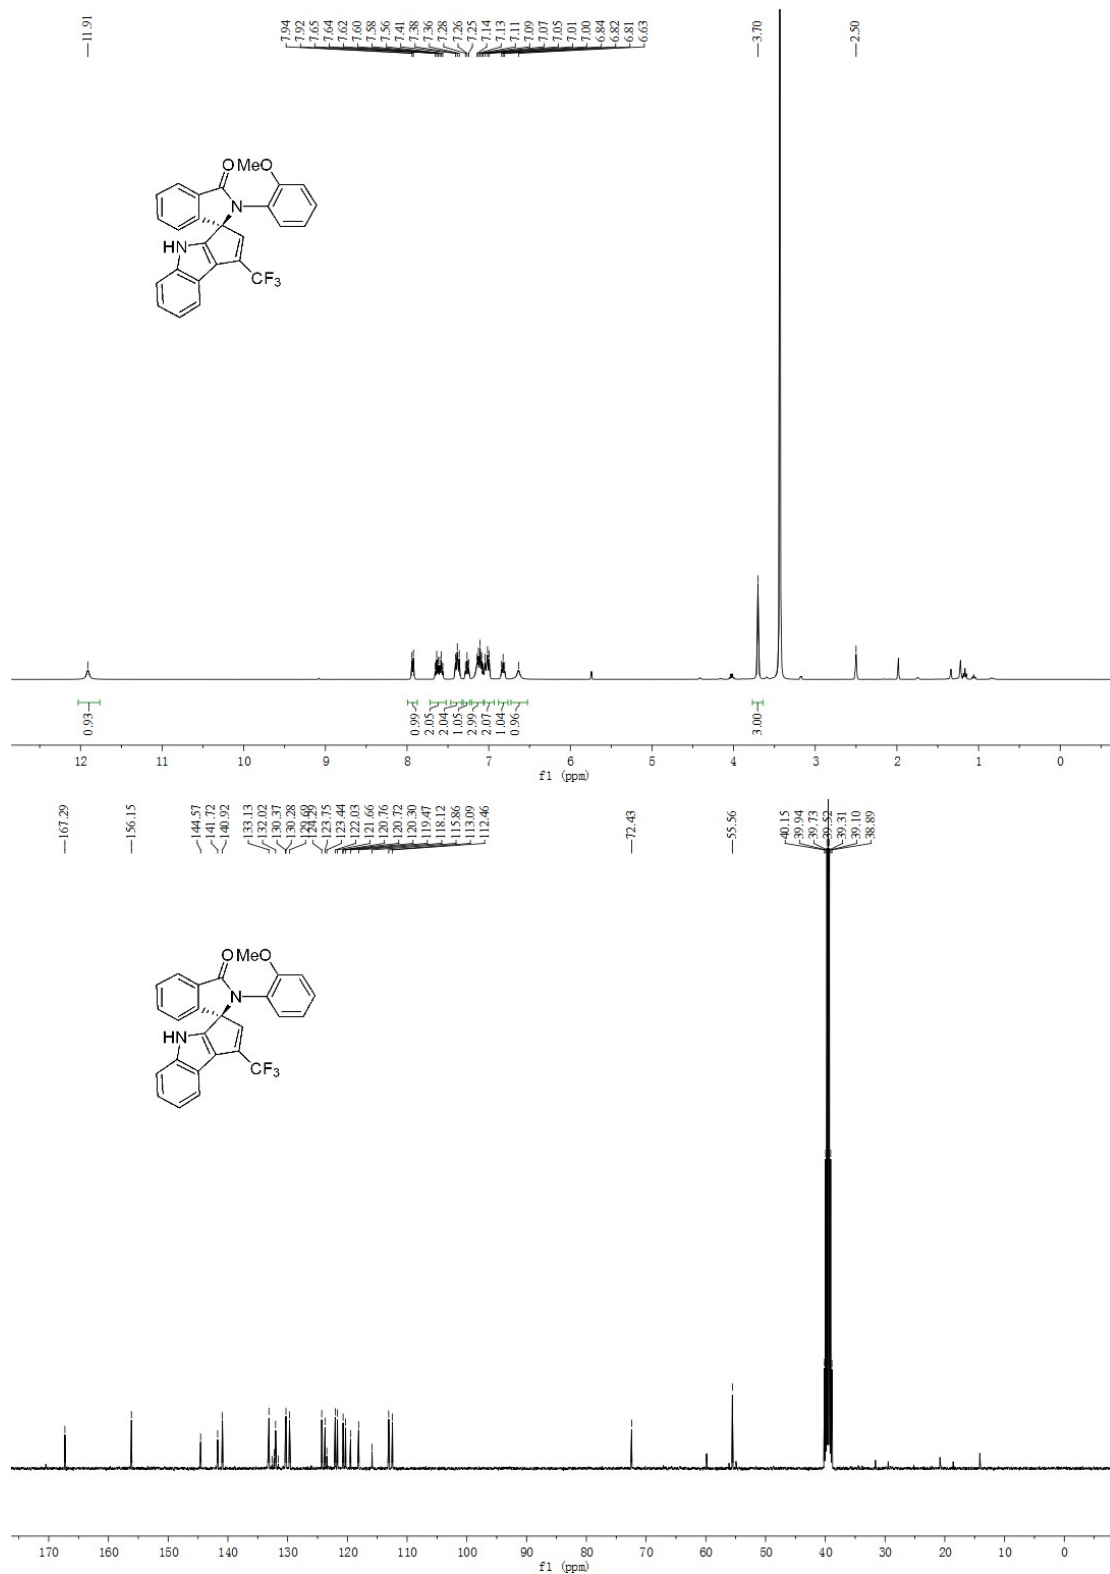

**(R)-2'-(4-methoxyphenyl)-1-(trifluoromethyl)-4H-spiro[cyclopenta[b]indole-3,1'-isoindolin]-3'-one (2c)**

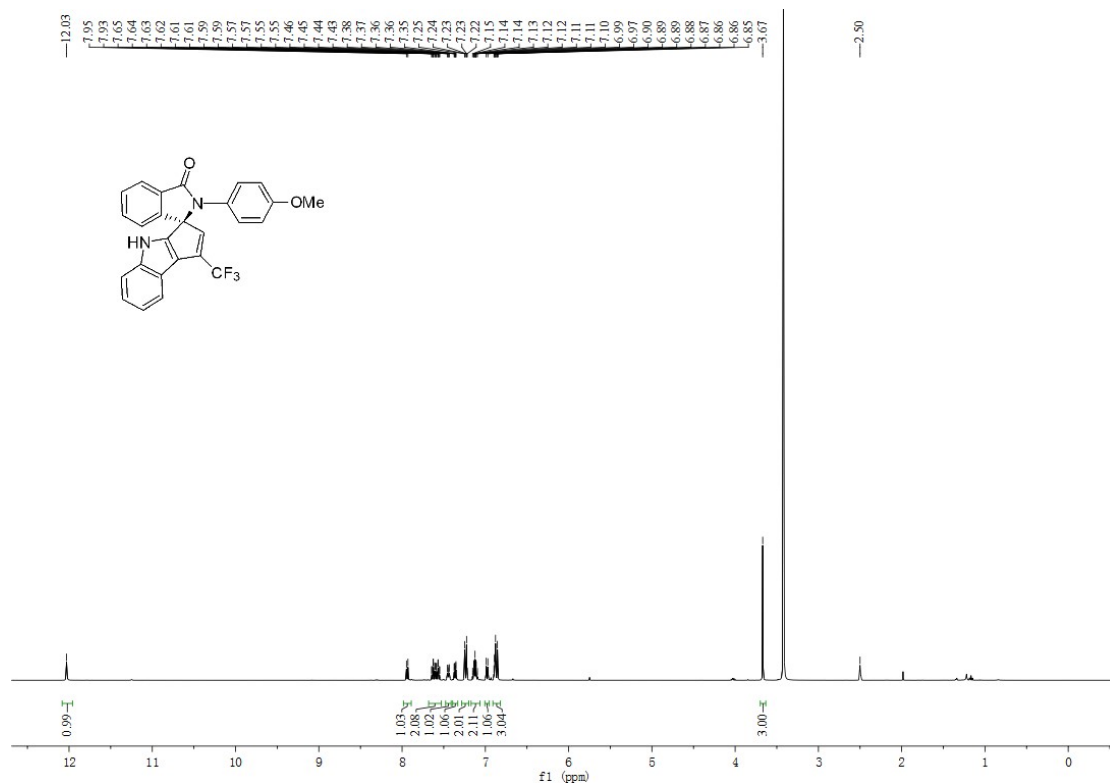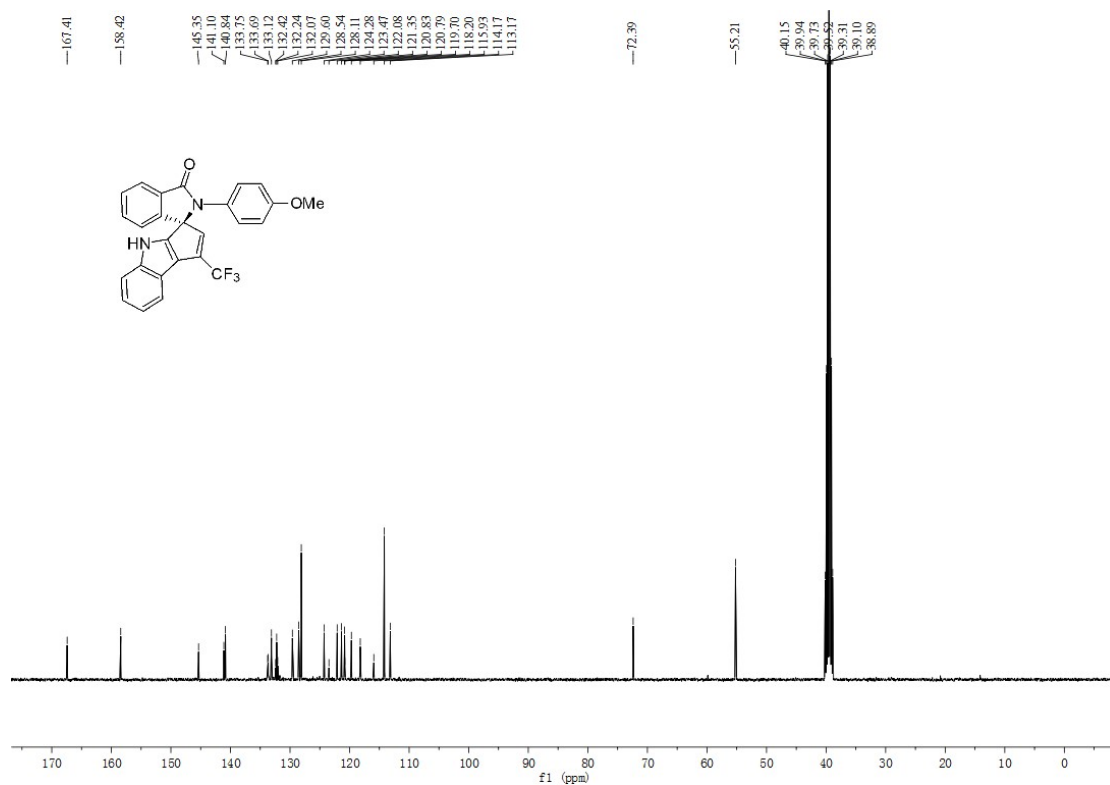

**(R)-2'-(p-tolyl)-1-(trifluoromethyl)-4H-spiro[cyclopenta[b]indole-3,1'-isoindolin]-3'-one (2d)**

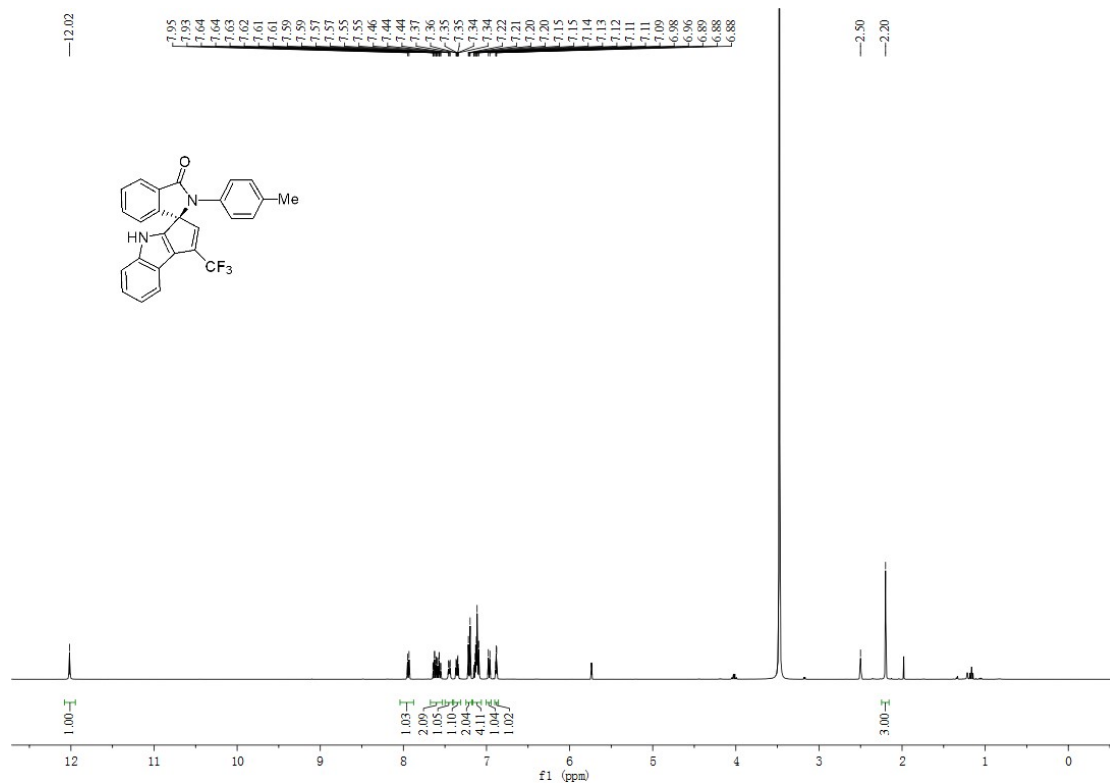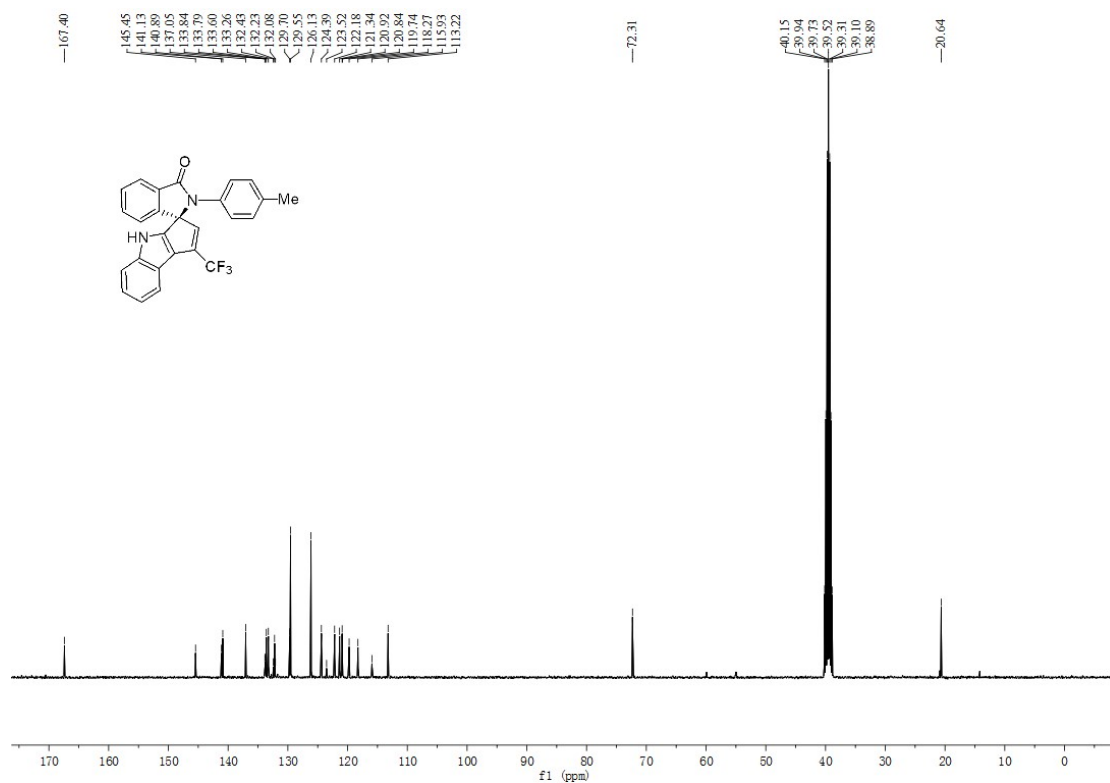

**(R)-2'-(4-chlorophenyl)-1-(trifluoromethyl)-4H-spiro[cyclopenta[b]indole-3,1'-isoindolin]-3'-one (2e)**

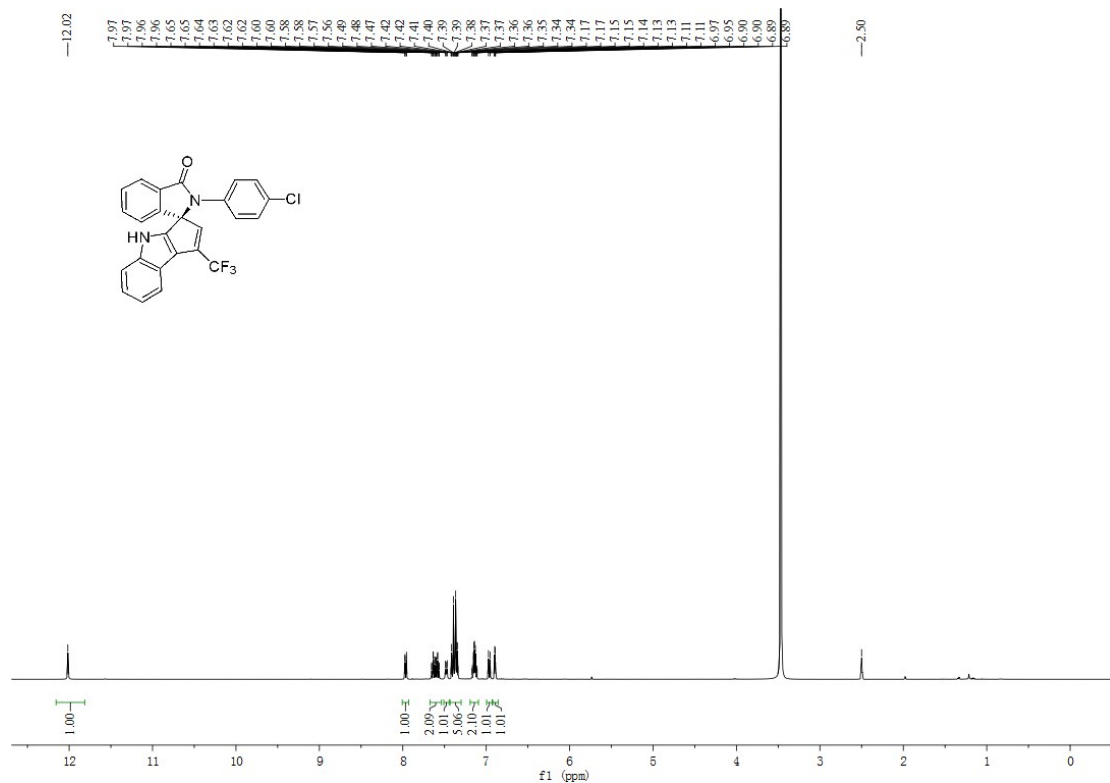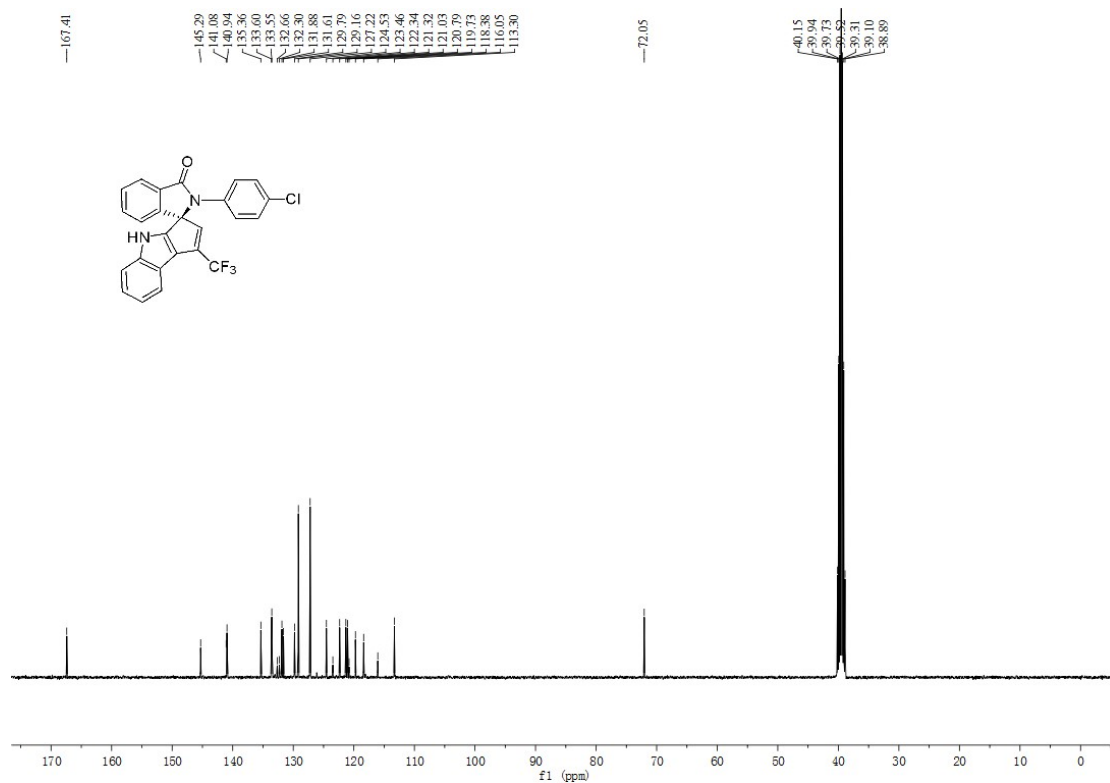

**(R)-2'-(4-(tert-butyl)phenyl)-1-(trifluoromethyl)-4H-spiro[cyclopenta[b]indole-3,1'-isoindolin]-3'-one (2f)**

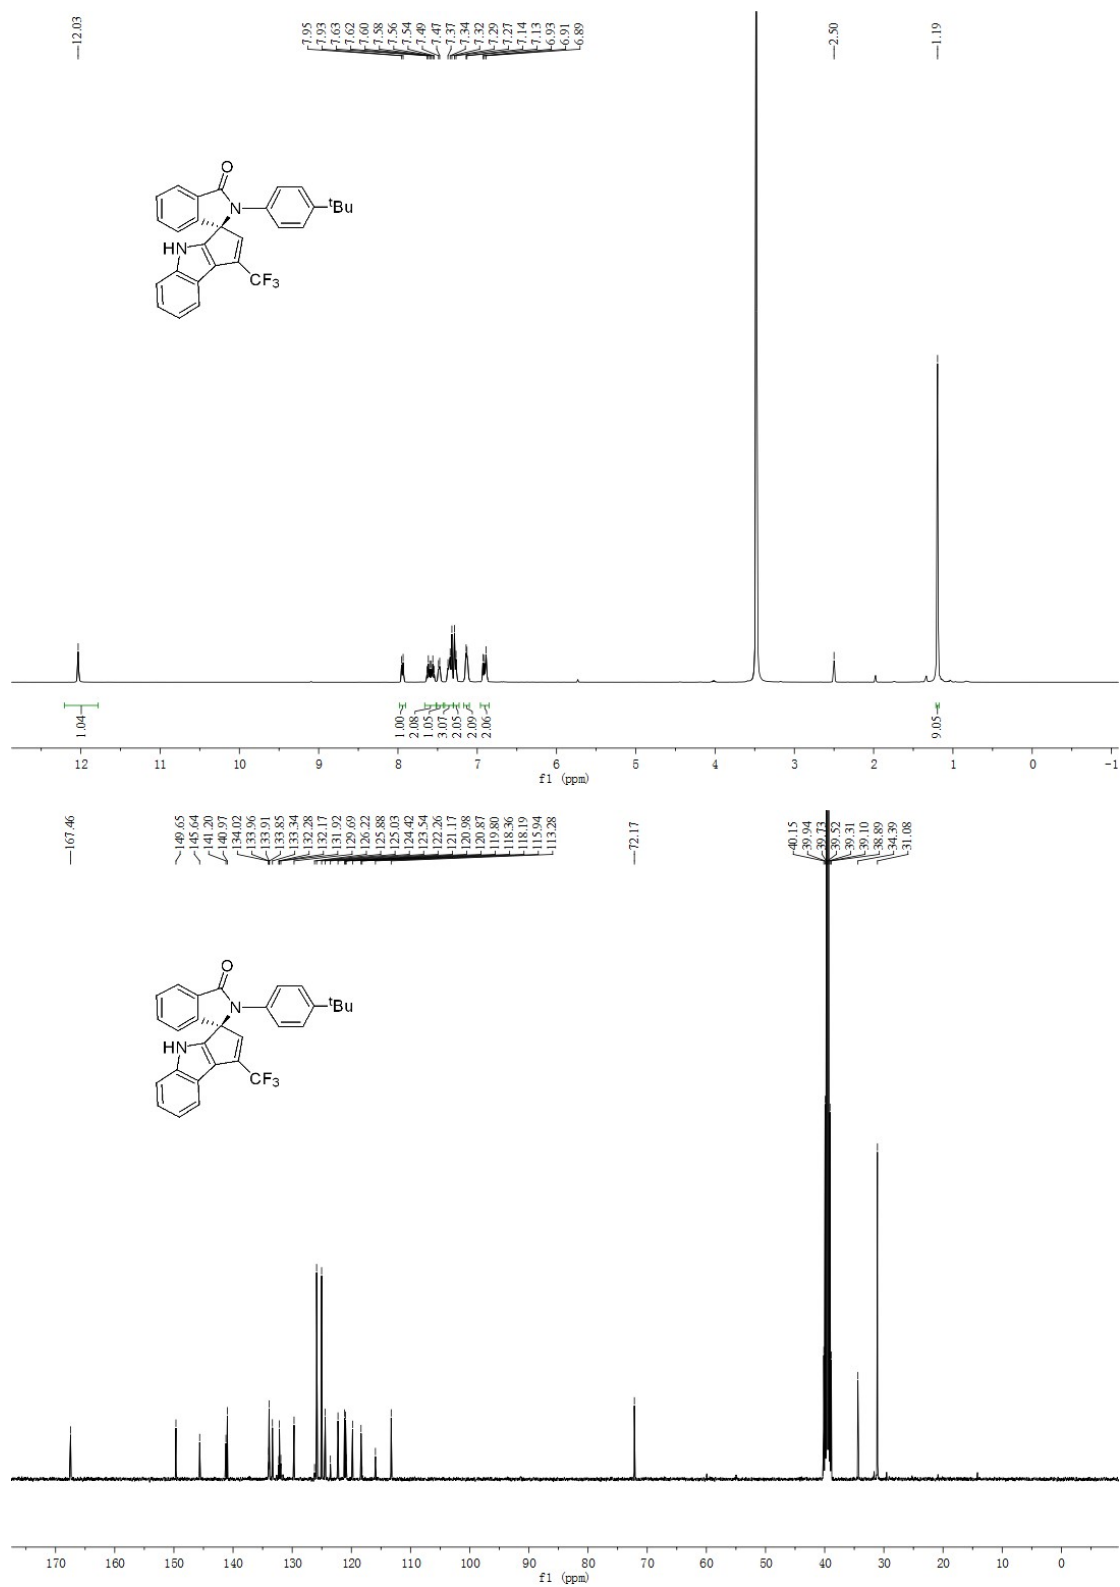

**(R)-2'-(4-bromophenyl)-1-(trifluoromethyl)-4H-spiro[cyclopenta[b]indole-3,1'-isoindolin]-3'-one (2g)**

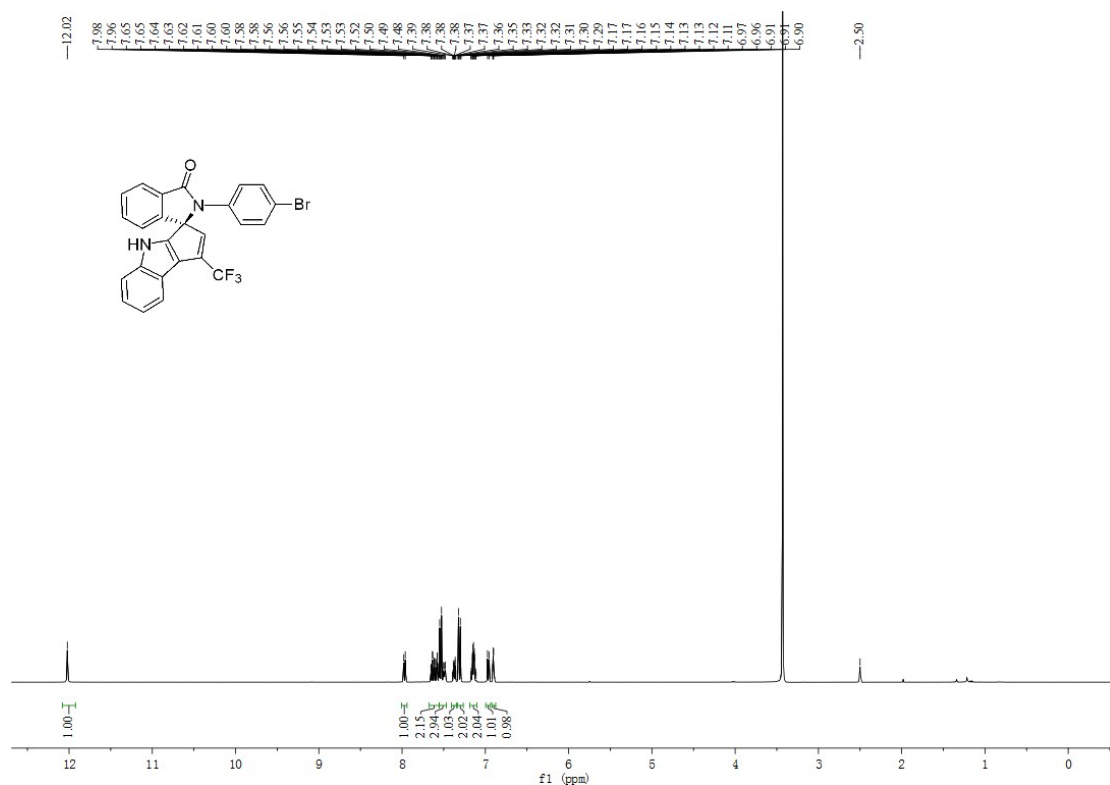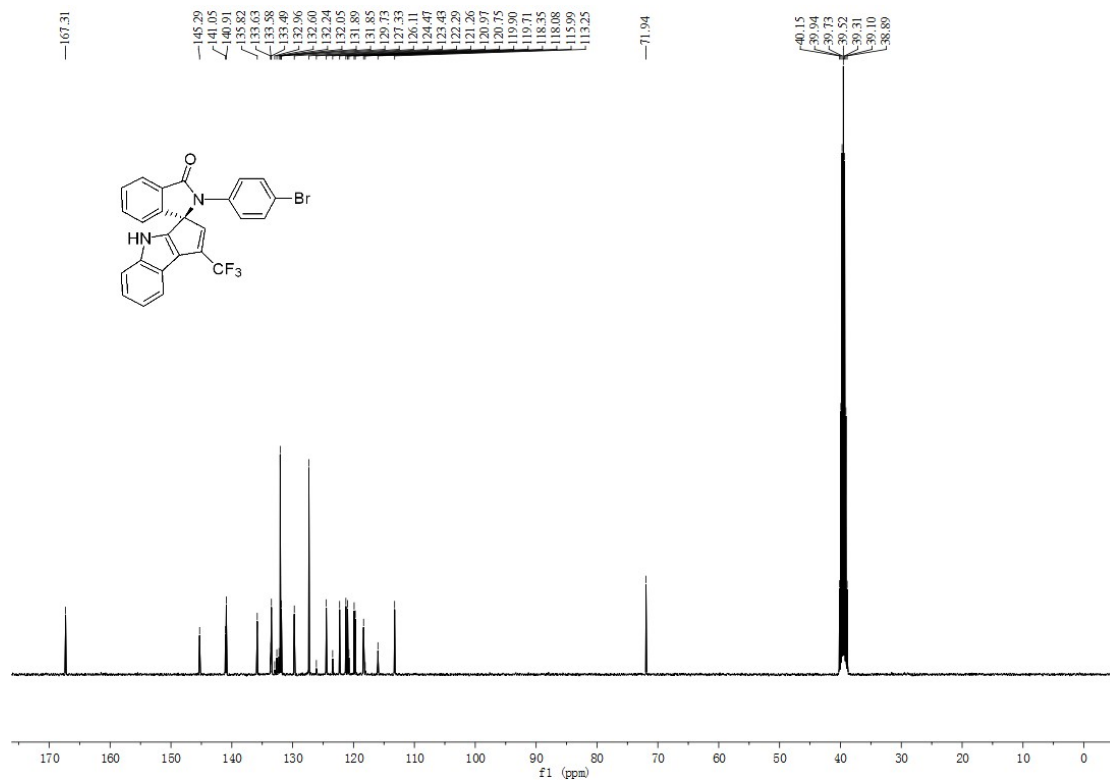

Ethyl

(R)-4-(3'-oxo-1-(trifluoromethyl)-4H-

spiro[cyclopenta[b]indole-3,1'-isoindolin]-2'-yl)benzoate (2h)

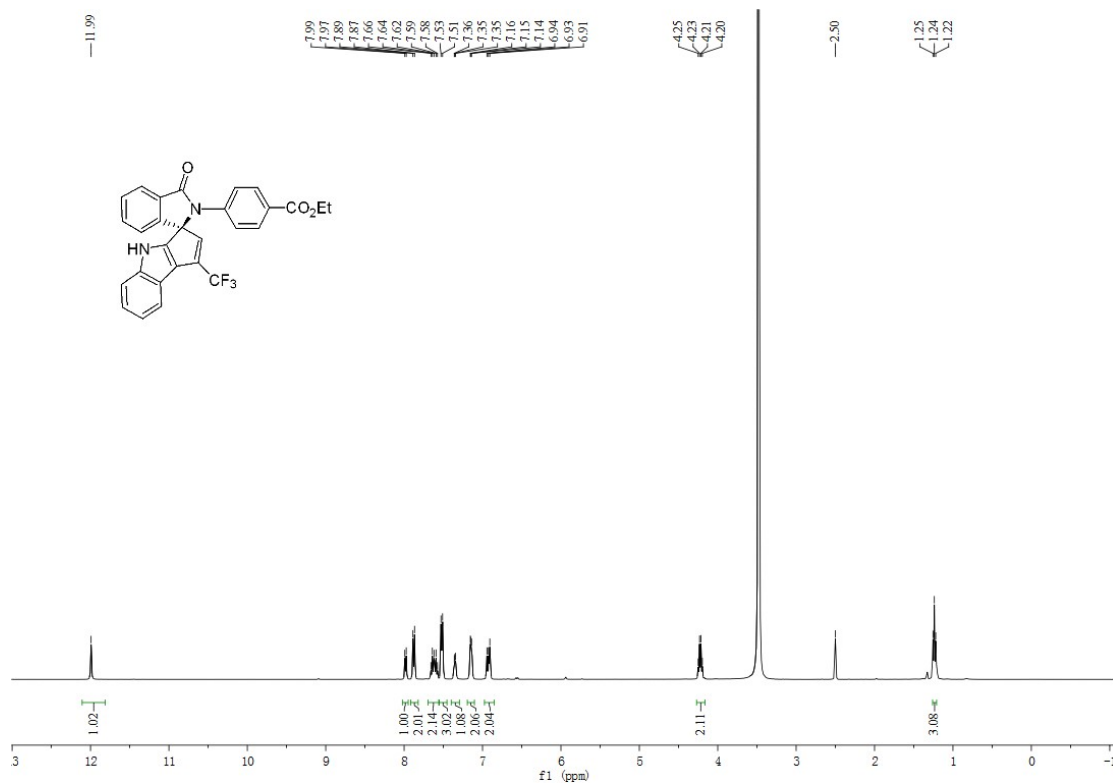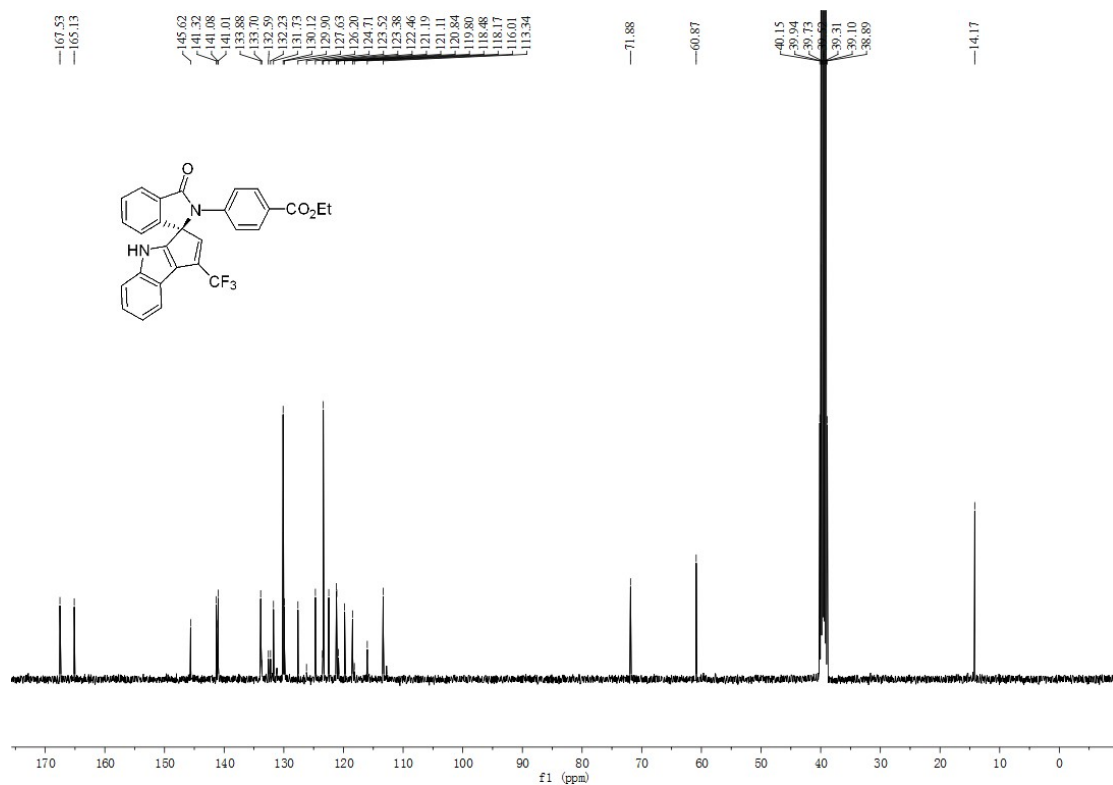



**(R)-2'-(2-nitrophenyl)-1-(trifluoromethyl)-4H-spiro[cyclopenta[b]indole-3,1'-isoindolin]-3'-one (2i)**

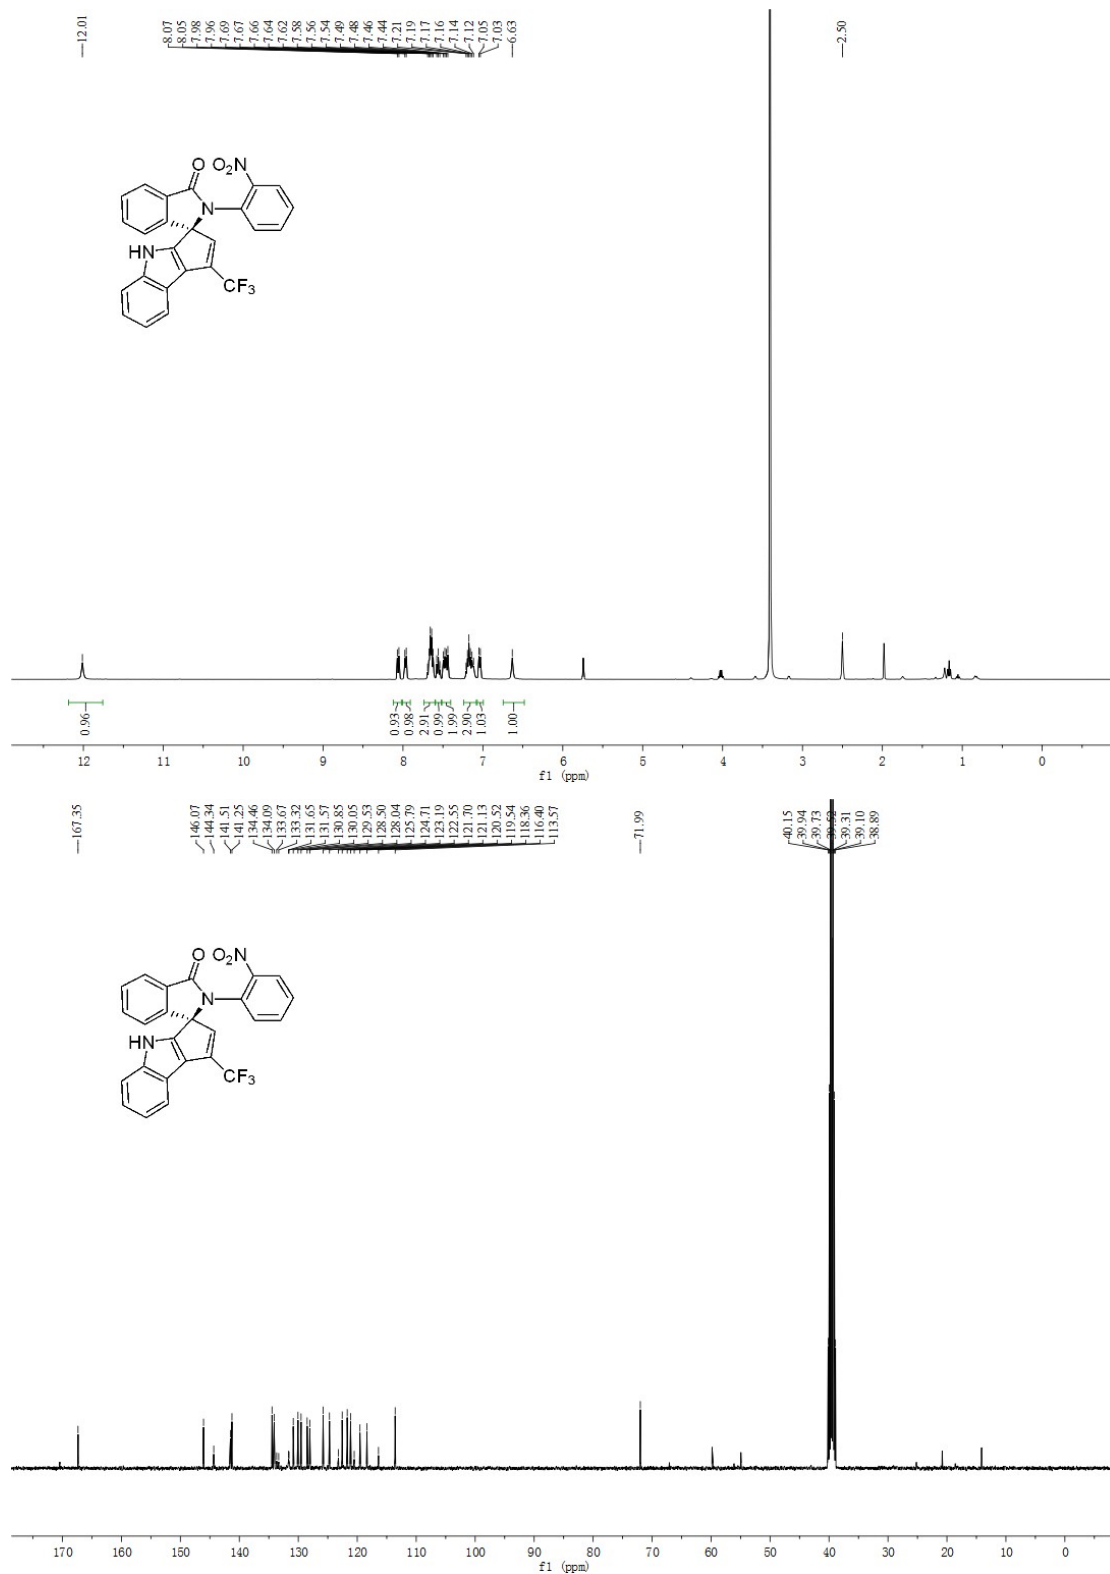

**(R)-2'-(naphthalen-2-yl)-1-(trifluoromethyl)-4H-spiro[cyclopenta[b]indole-3,1'-isoindolin]-3'-one (2j)**

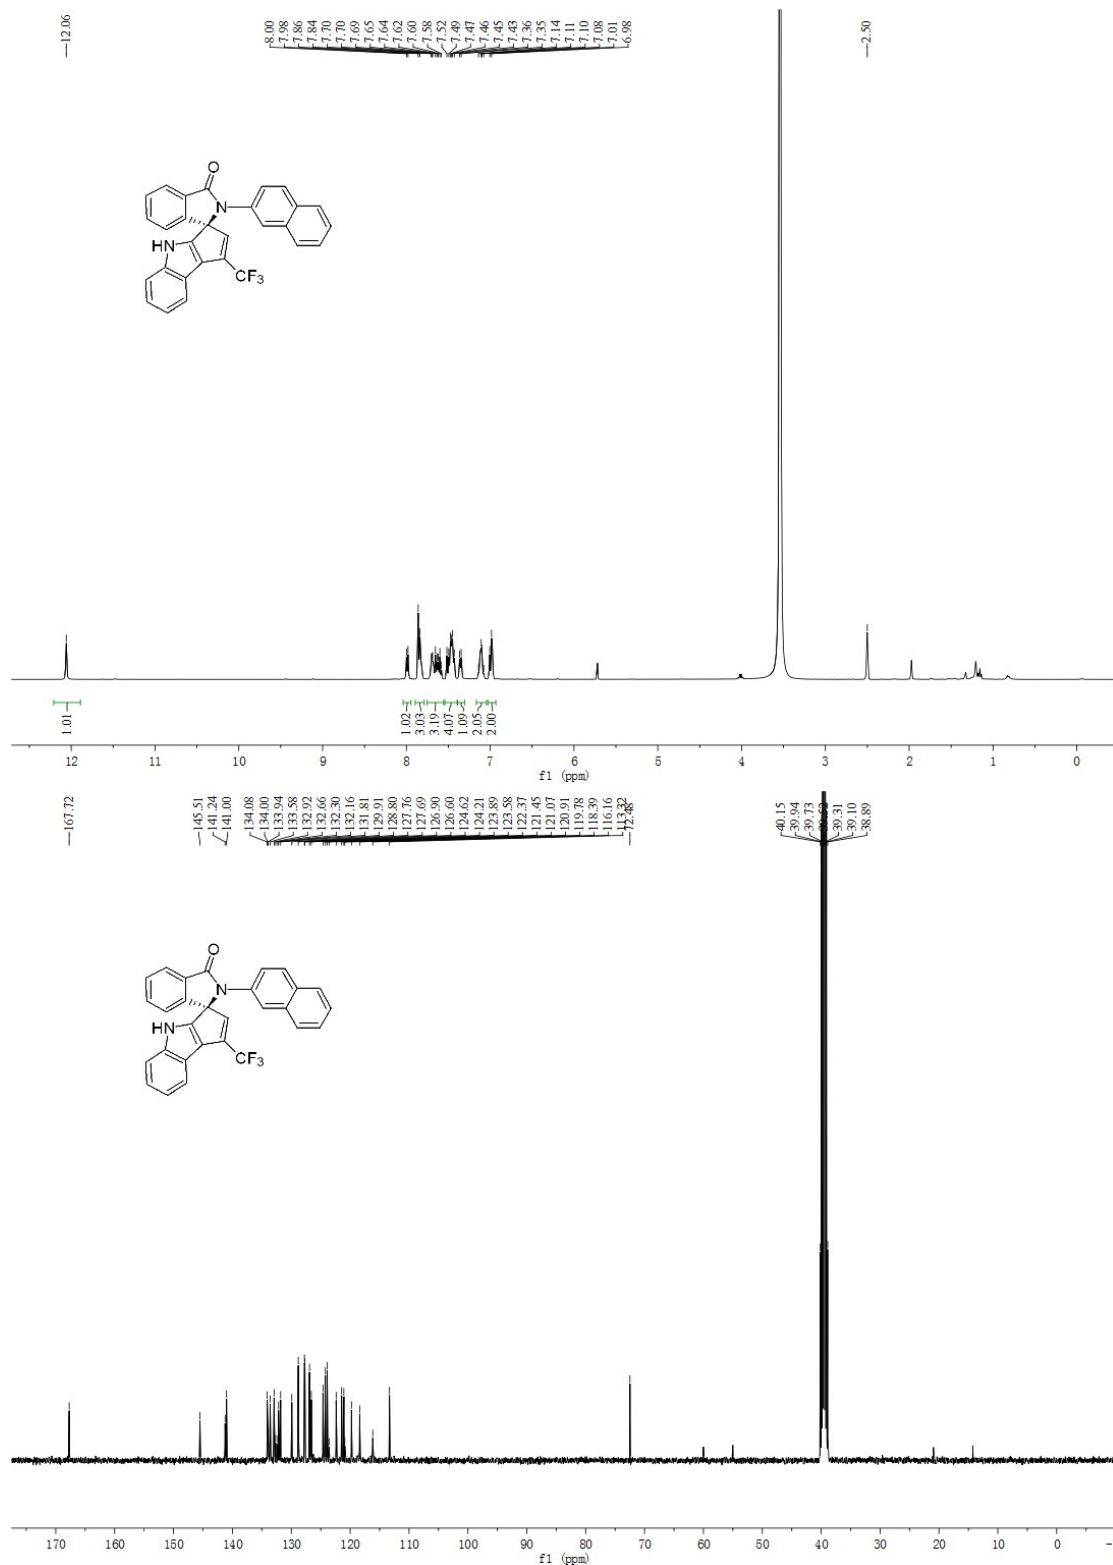

**(R)-2'-propyl-1-(trifluoromethyl)-4H-spiro[cyclopenta[b]indole-3,1'-isoindolin]-3'-one (2k)**

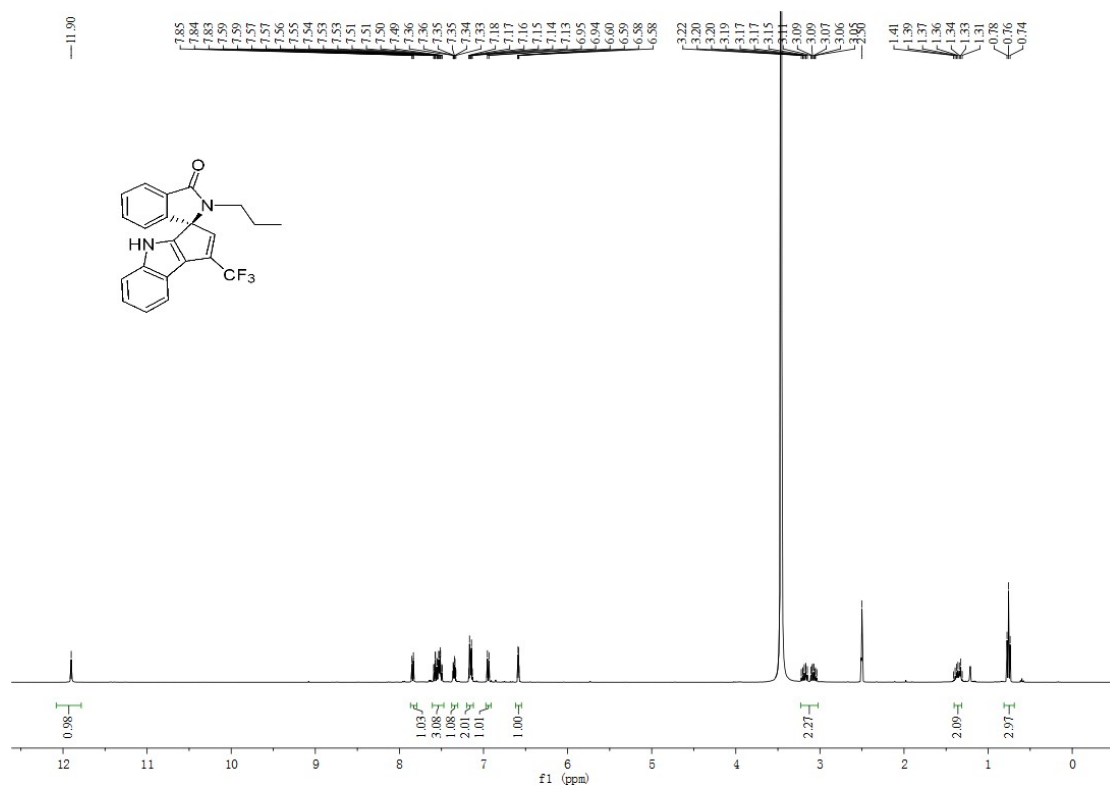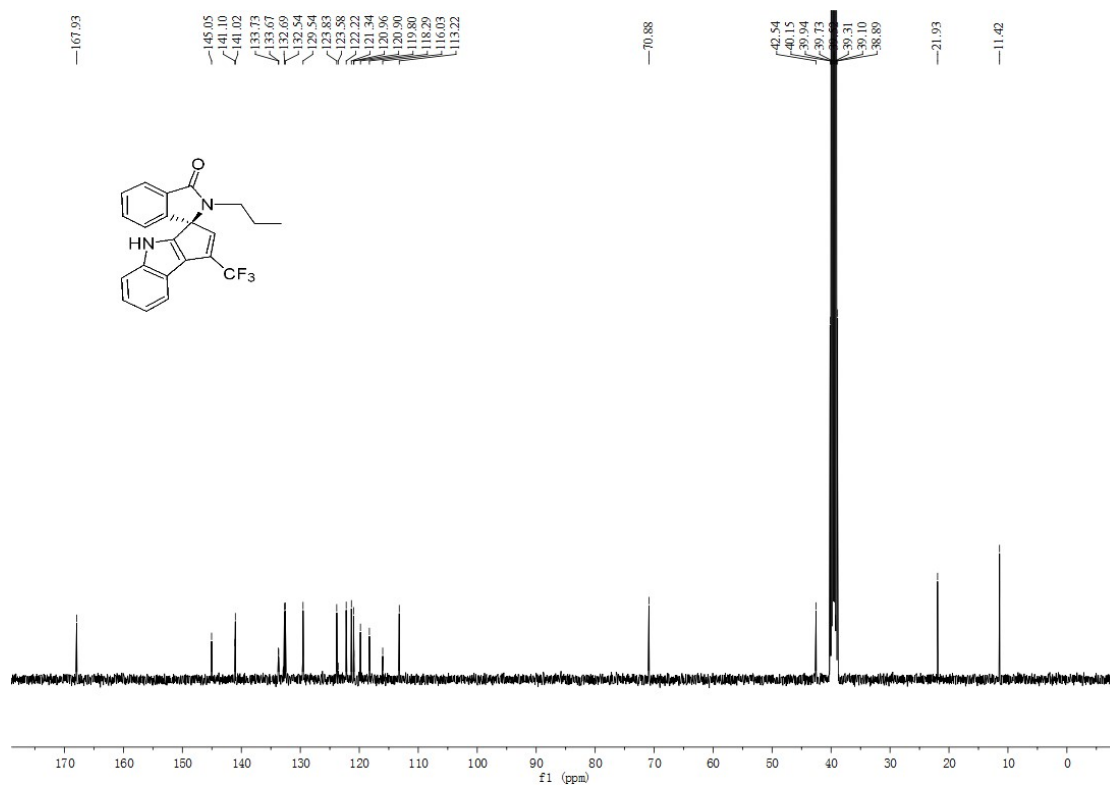

**(R)-2'-cyclopropyl-1-(trifluoromethyl)-4H-spiro[cyclopenta[b]indole-3,1'-isoindolin]-3'-one (2l)**

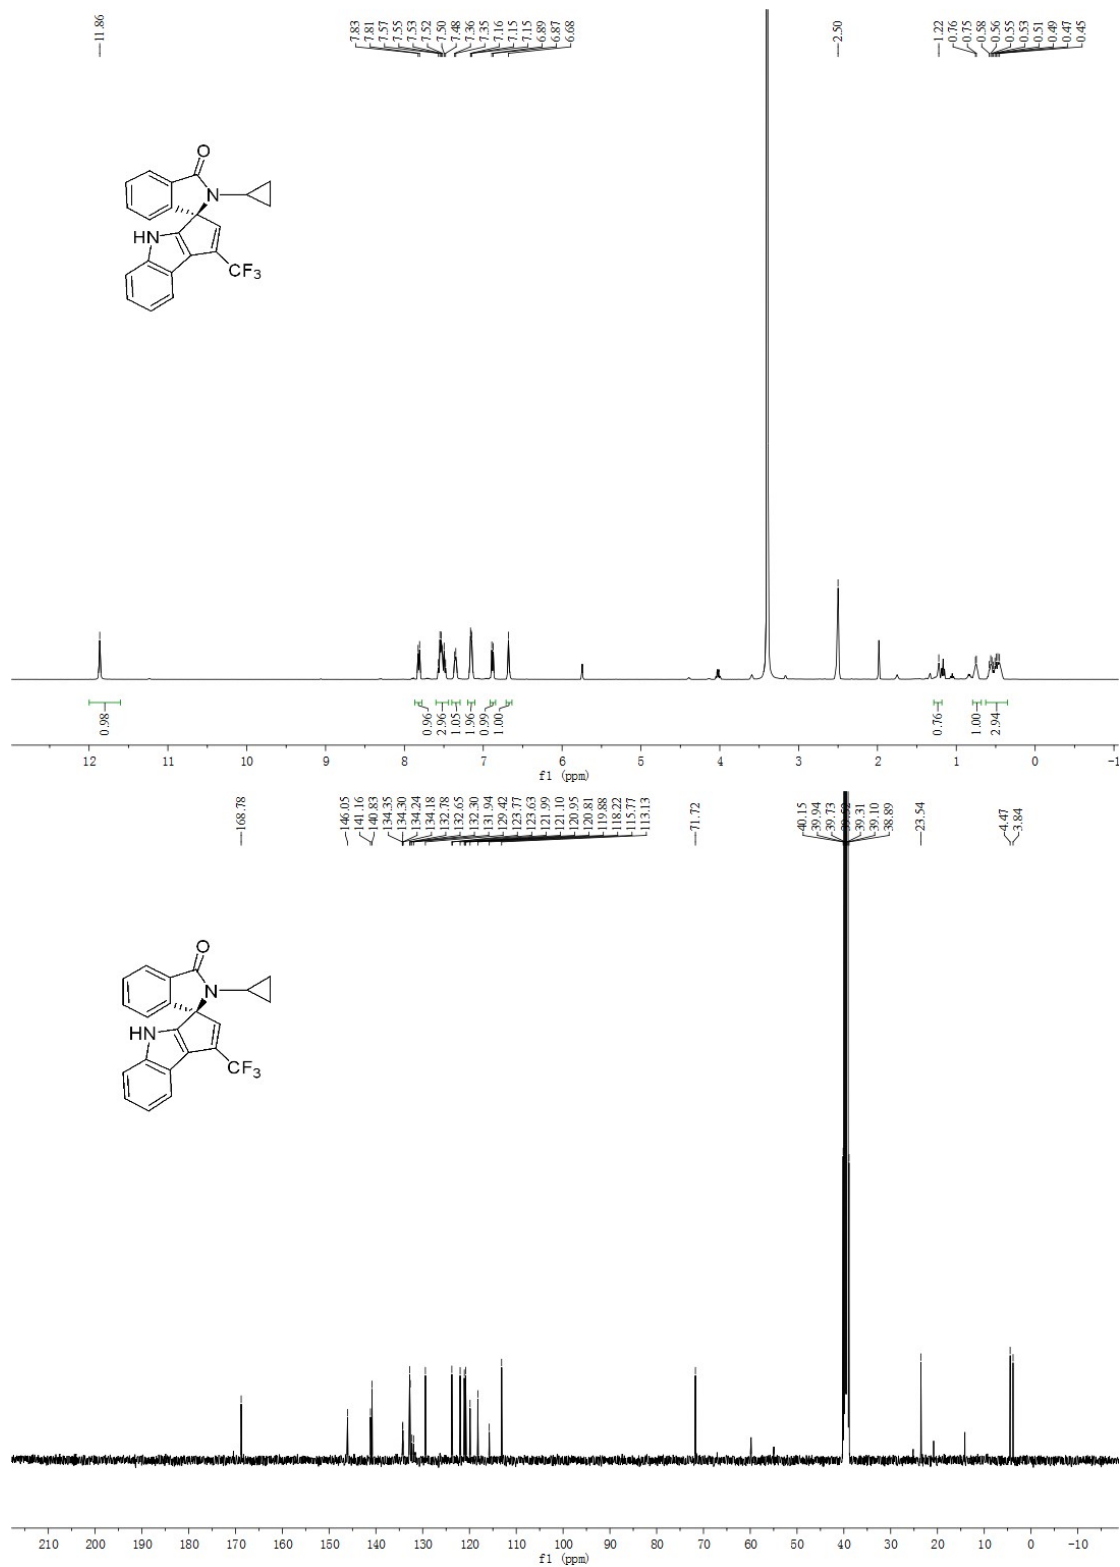

**(R)-2'-benzyl-1-(trifluoromethyl)-4H-spiro[cyclopenta[b]indole-3,1'-isoindolin]-3'-one (2m)**

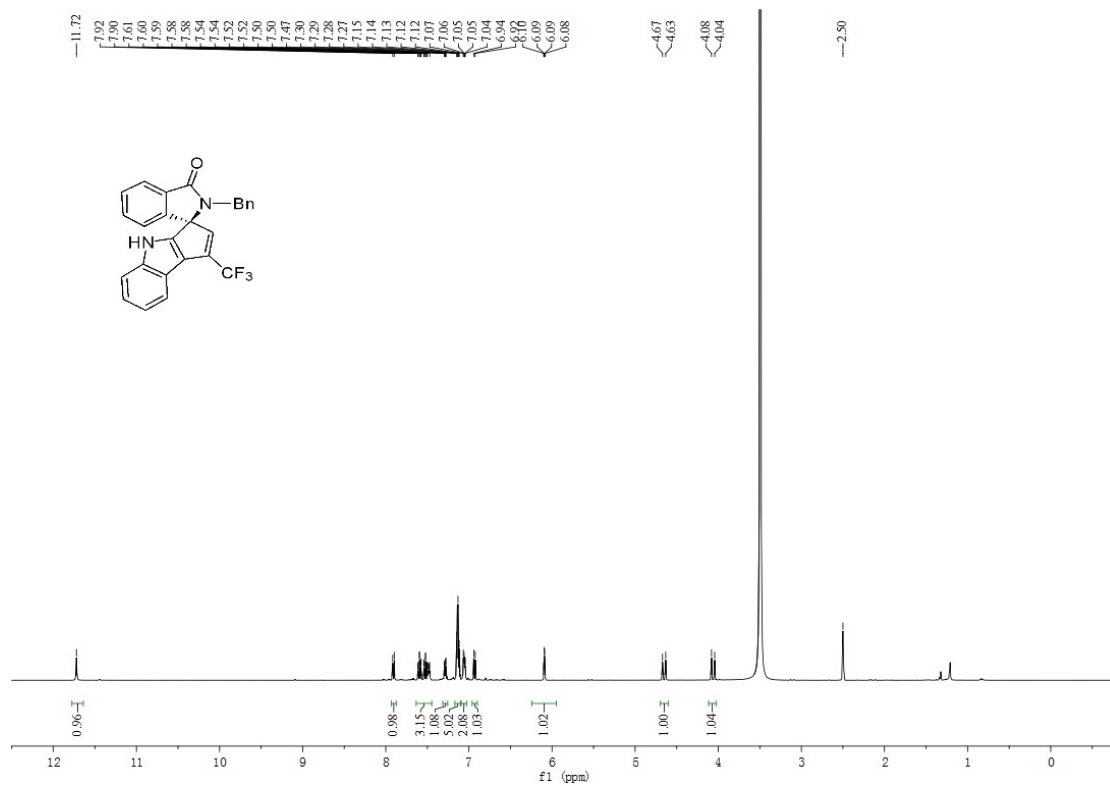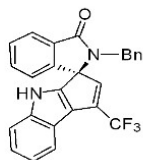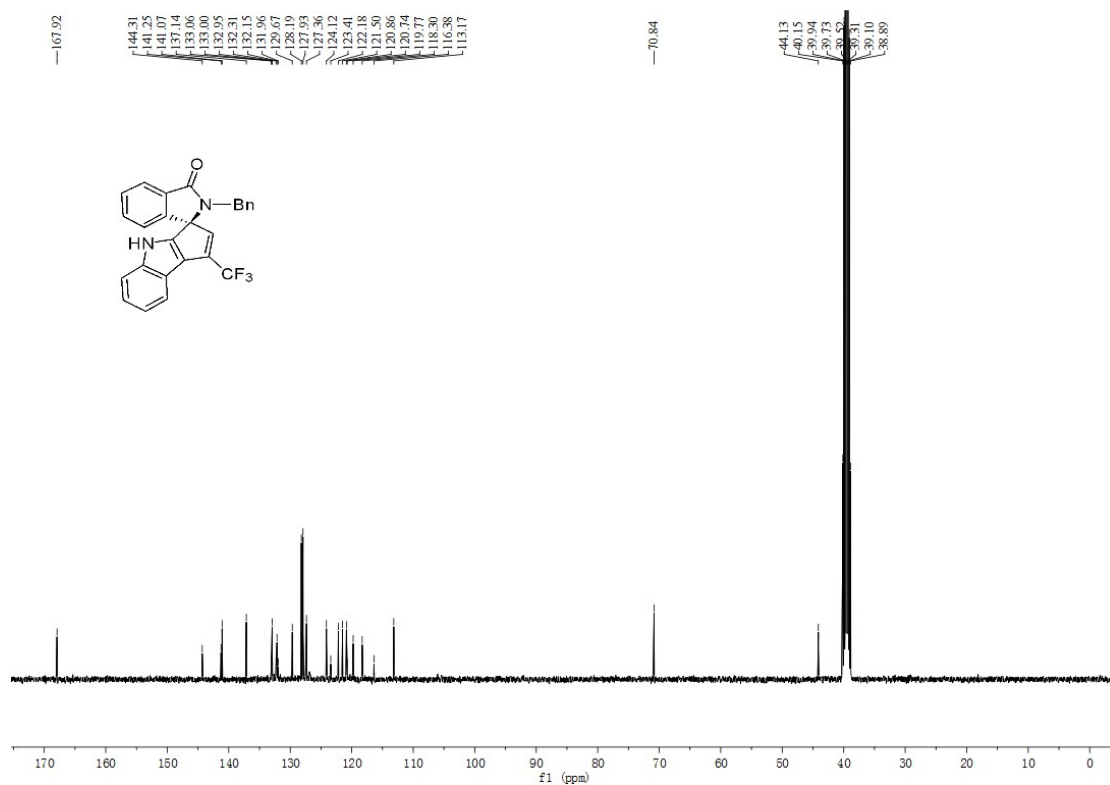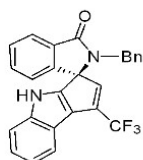

**(R)-5'-methoxy-2'-phenyl-1-(trifluoromethyl)-4H-spiro[cyclopenta[b]indole-3,1'-isoindolin]-3'-one (2n)**

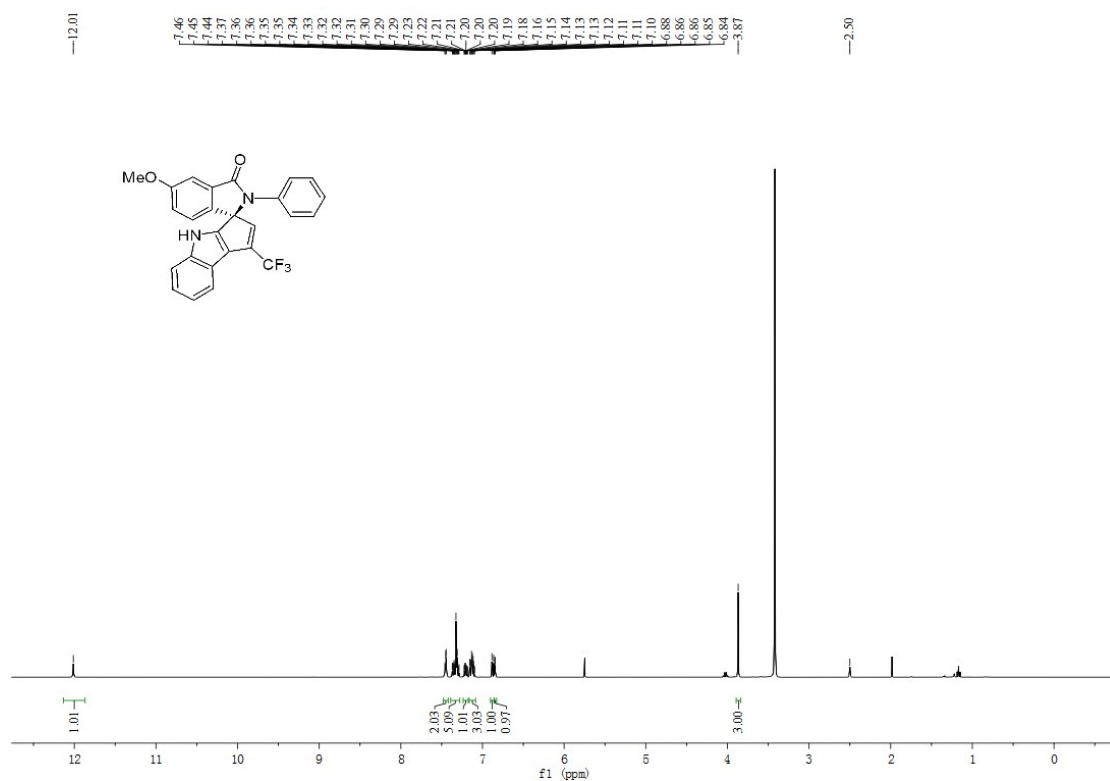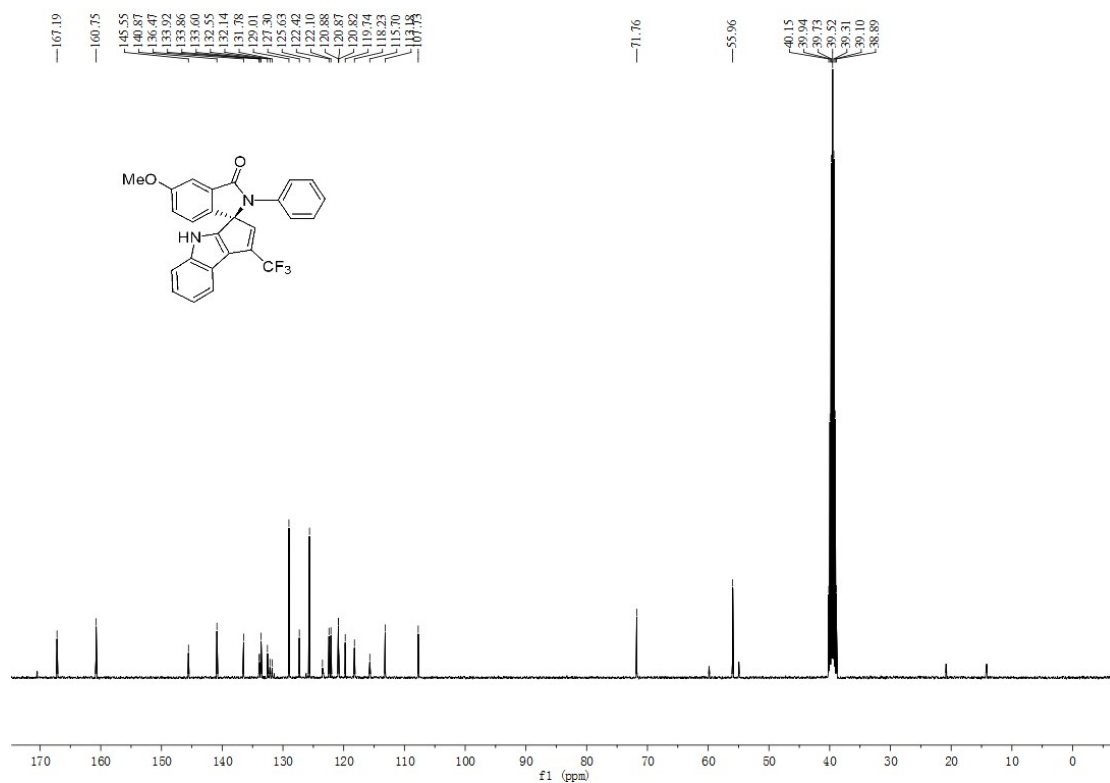

**(R)-5'-bromo-2'-phenyl-1-(trifluoromethyl)-4H-spiro[cyclopenta[b]indole-3,1'-isoindolin]-3'-one (2o)**

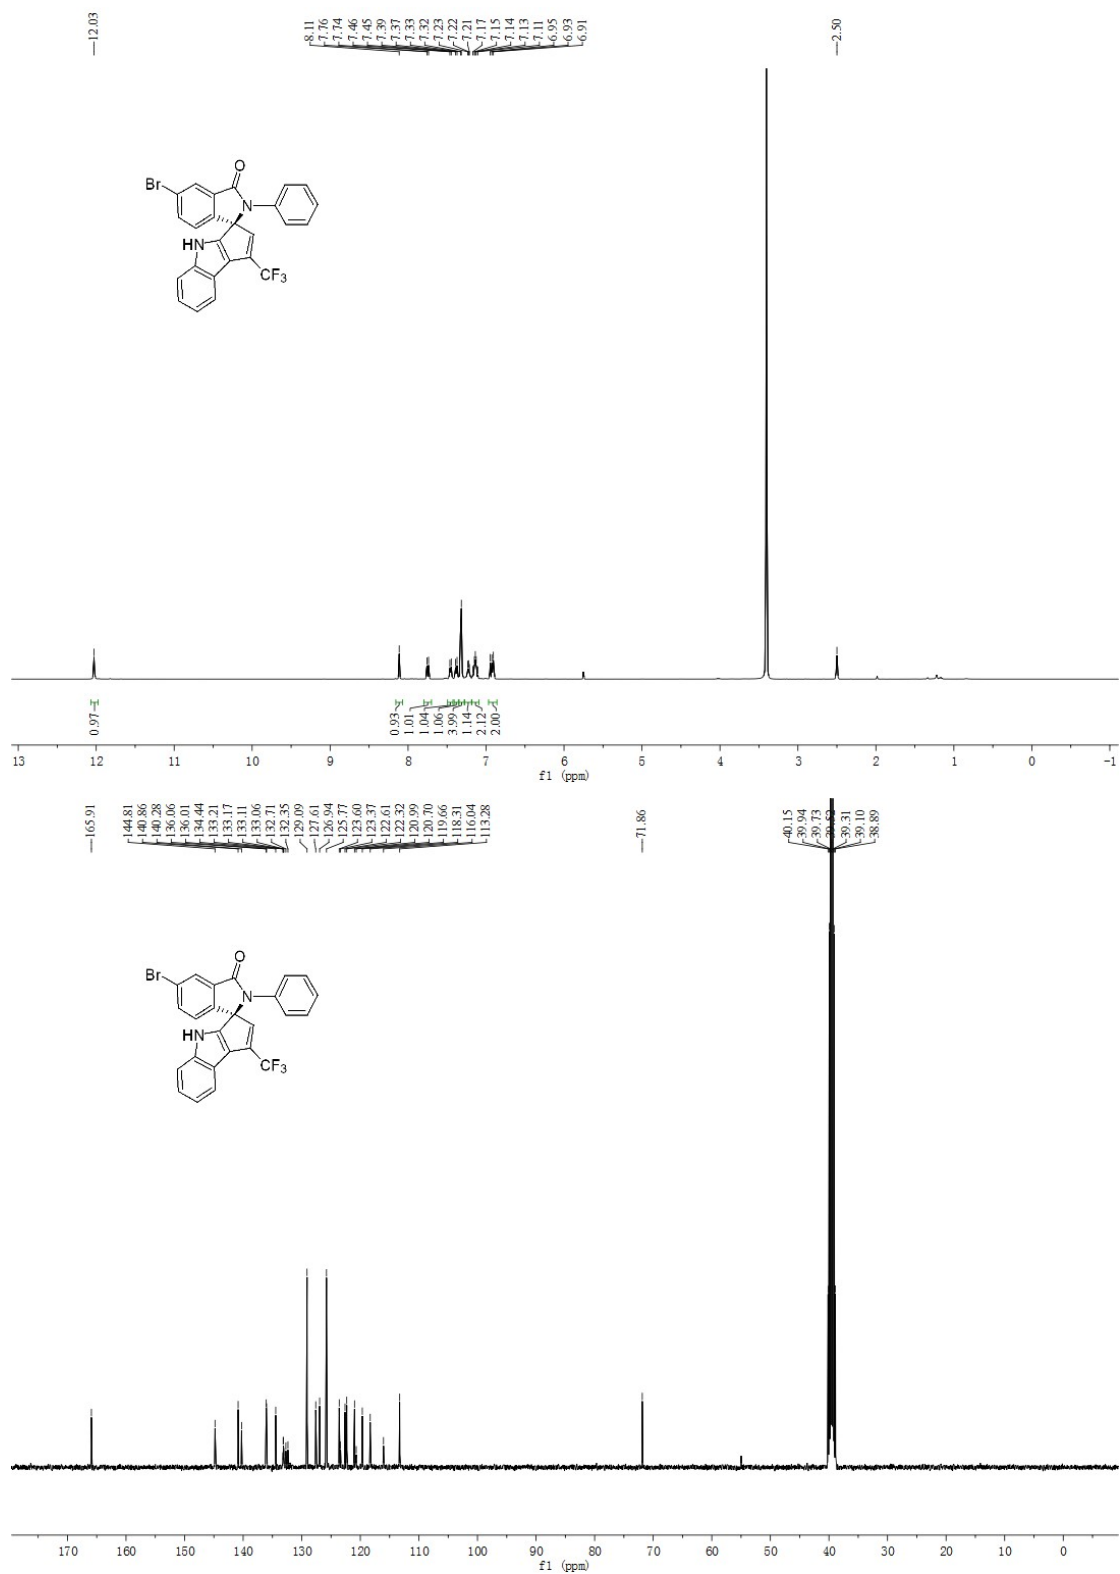

**(R)-5'-methyl-2'-phenyl-1-(trifluoromethyl)-4H-spiro[cyclopenta[b]indole-3,1'-isoindolin]-3'-one (2p)**

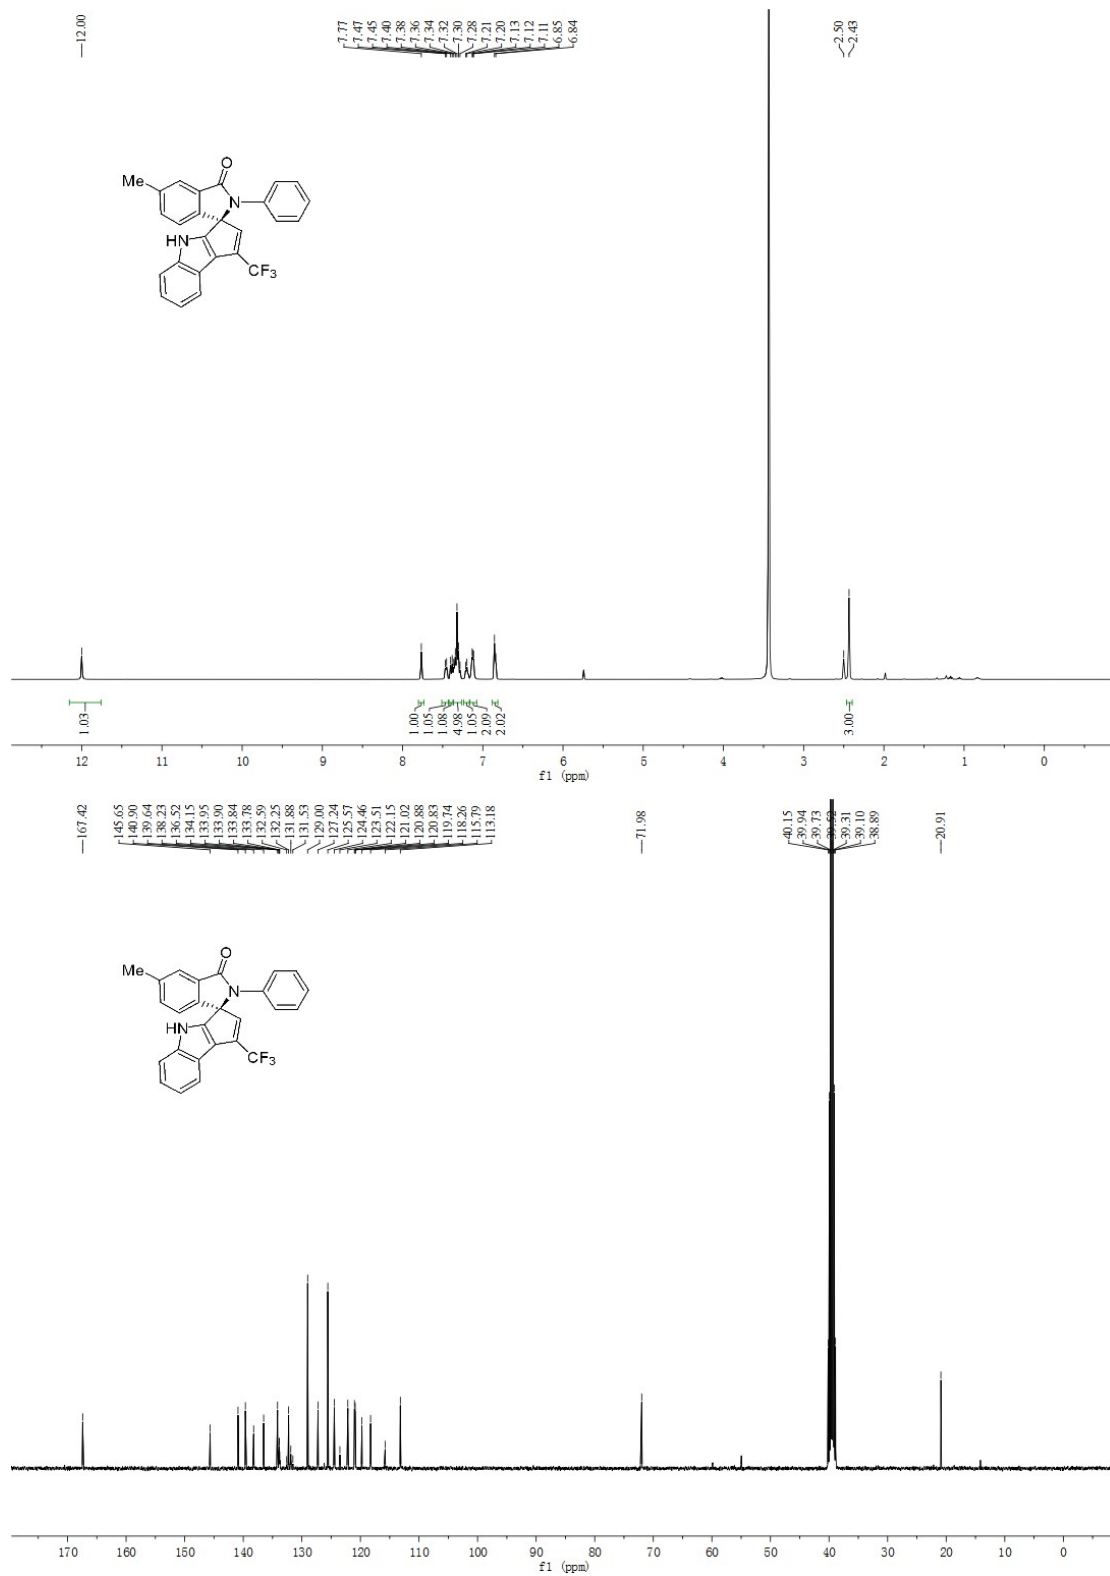





**(R)-5'-chloro-2'-phenyl-1-(trifluoromethyl)-4H-spiro[cyclopenta[b]indole-3,1'-isoindolin]-3'-one (2r)**

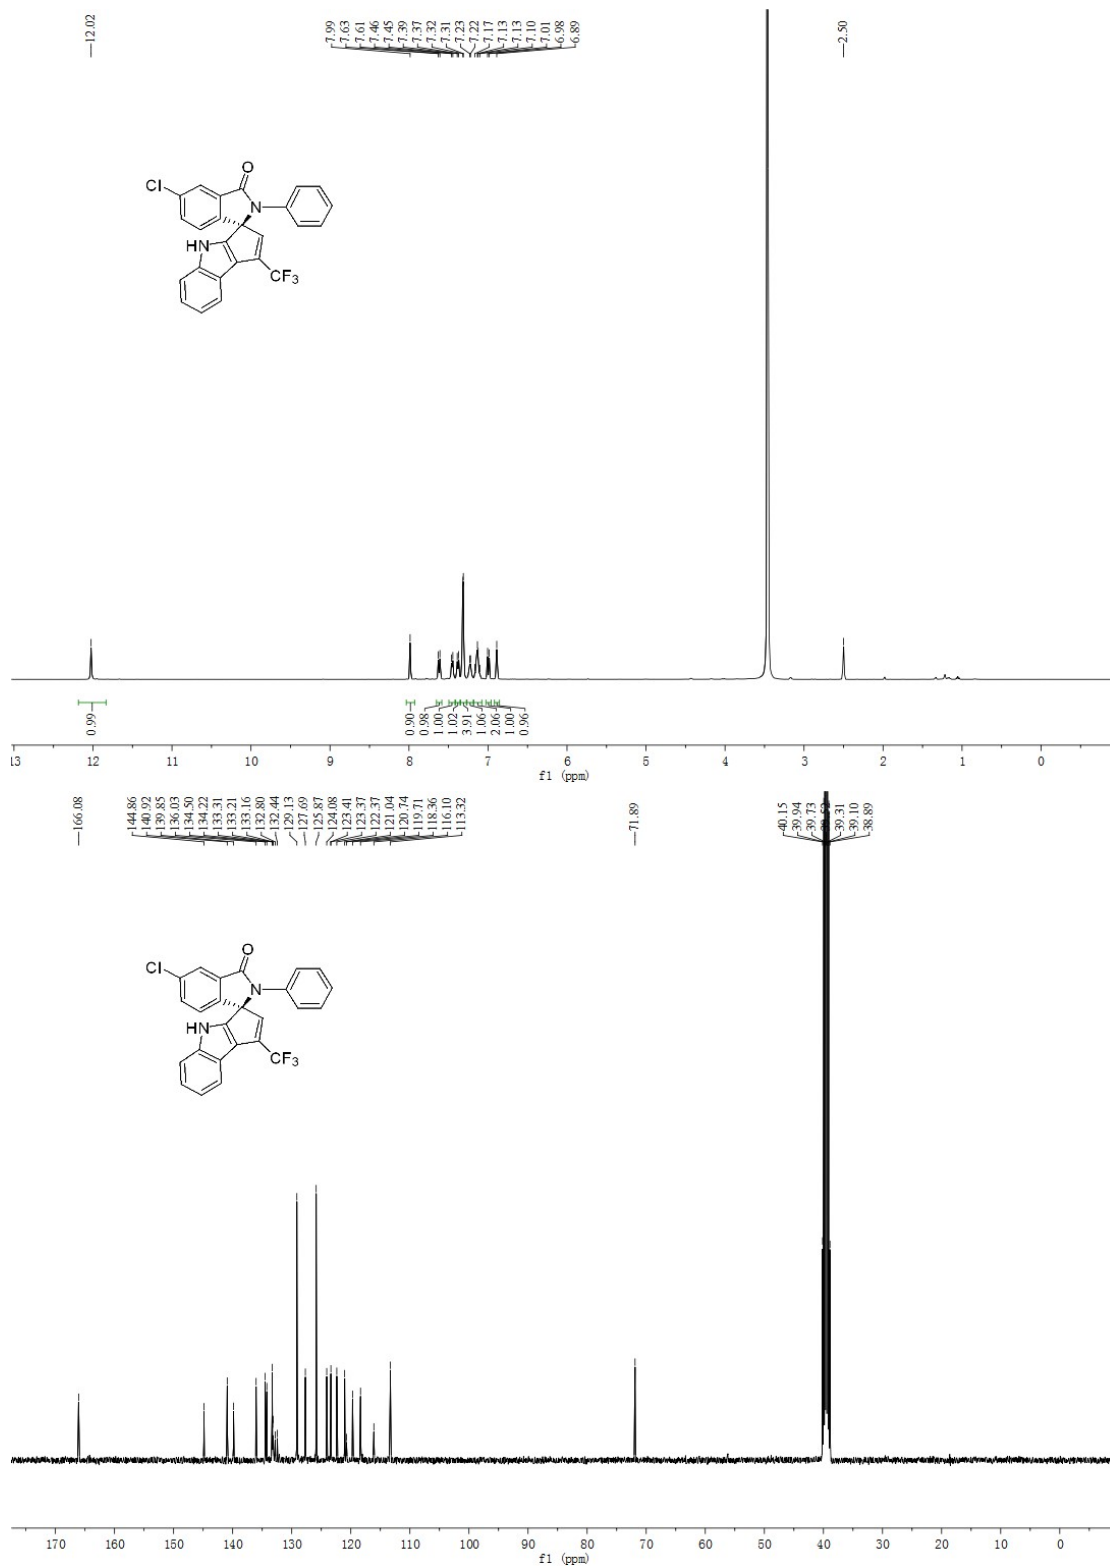

**(R)-6'-bromo-2'-phenyl-1-(trifluoromethyl)-4H-spiro[cyclopenta[b]indole-3,1'-isoindolin]-3'-one (2s)**

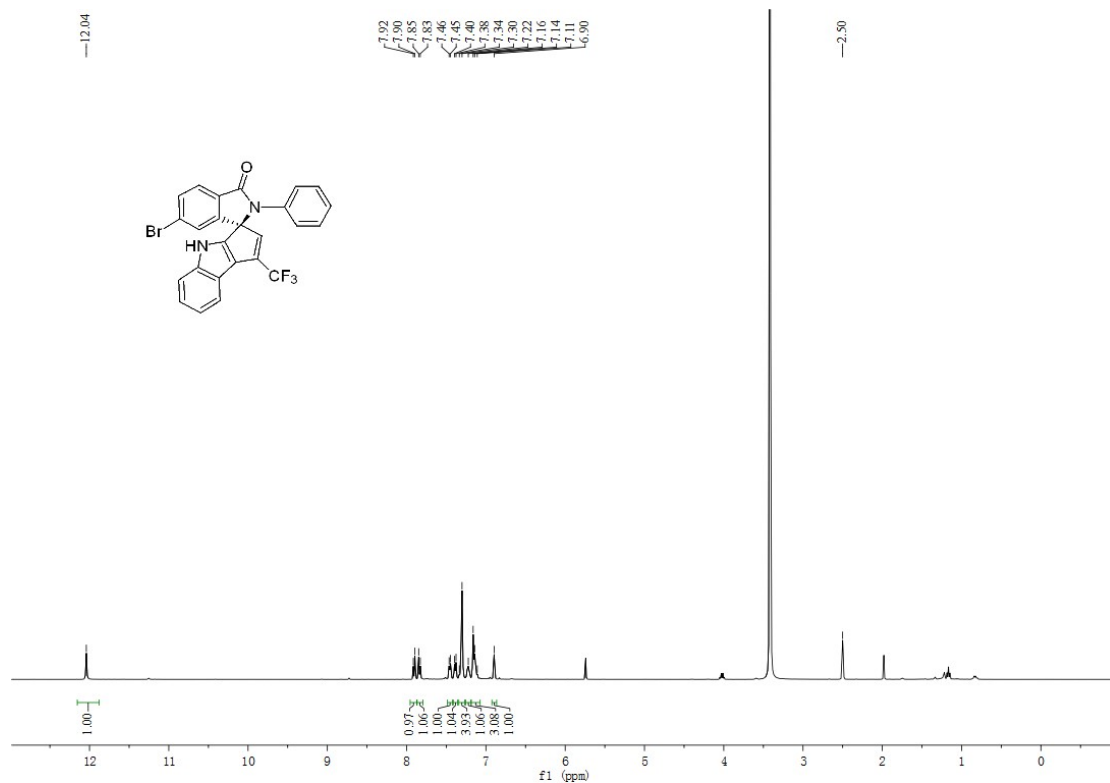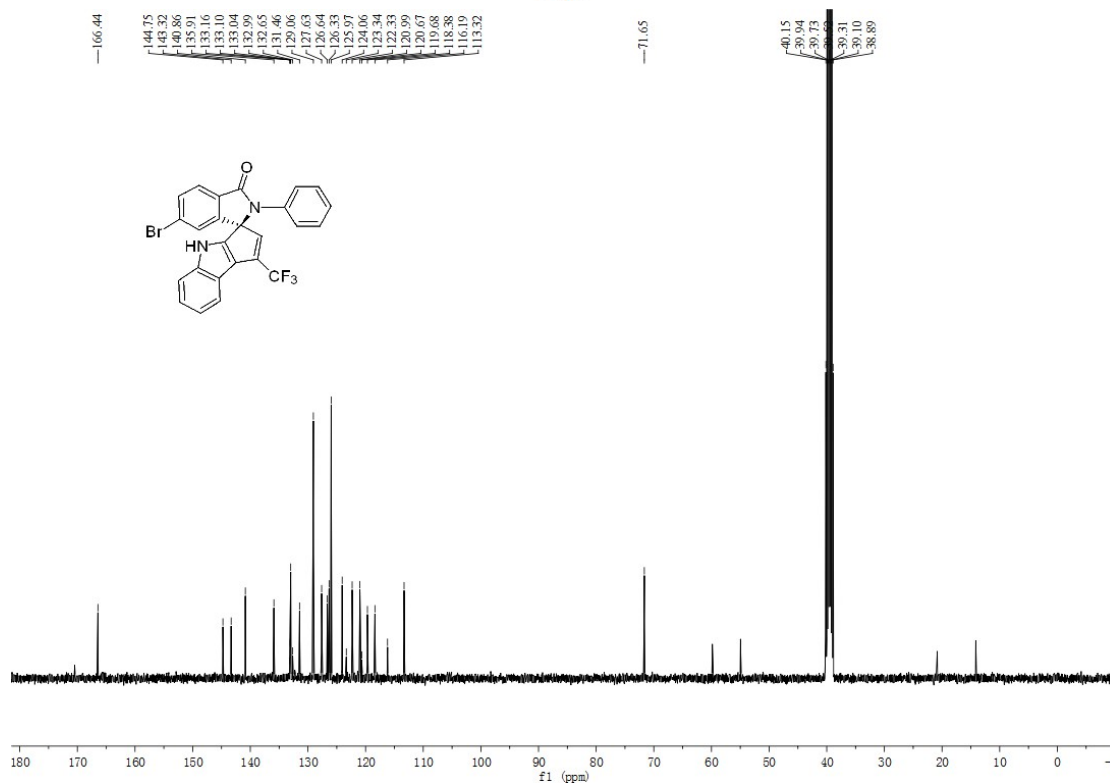

**(R)-6'-chloro-2'-phenyl-1-(trifluoromethyl)-4H-spiro[cyclopenta[b]indole-3,1'-isoindolin]-3'-one (2t)**

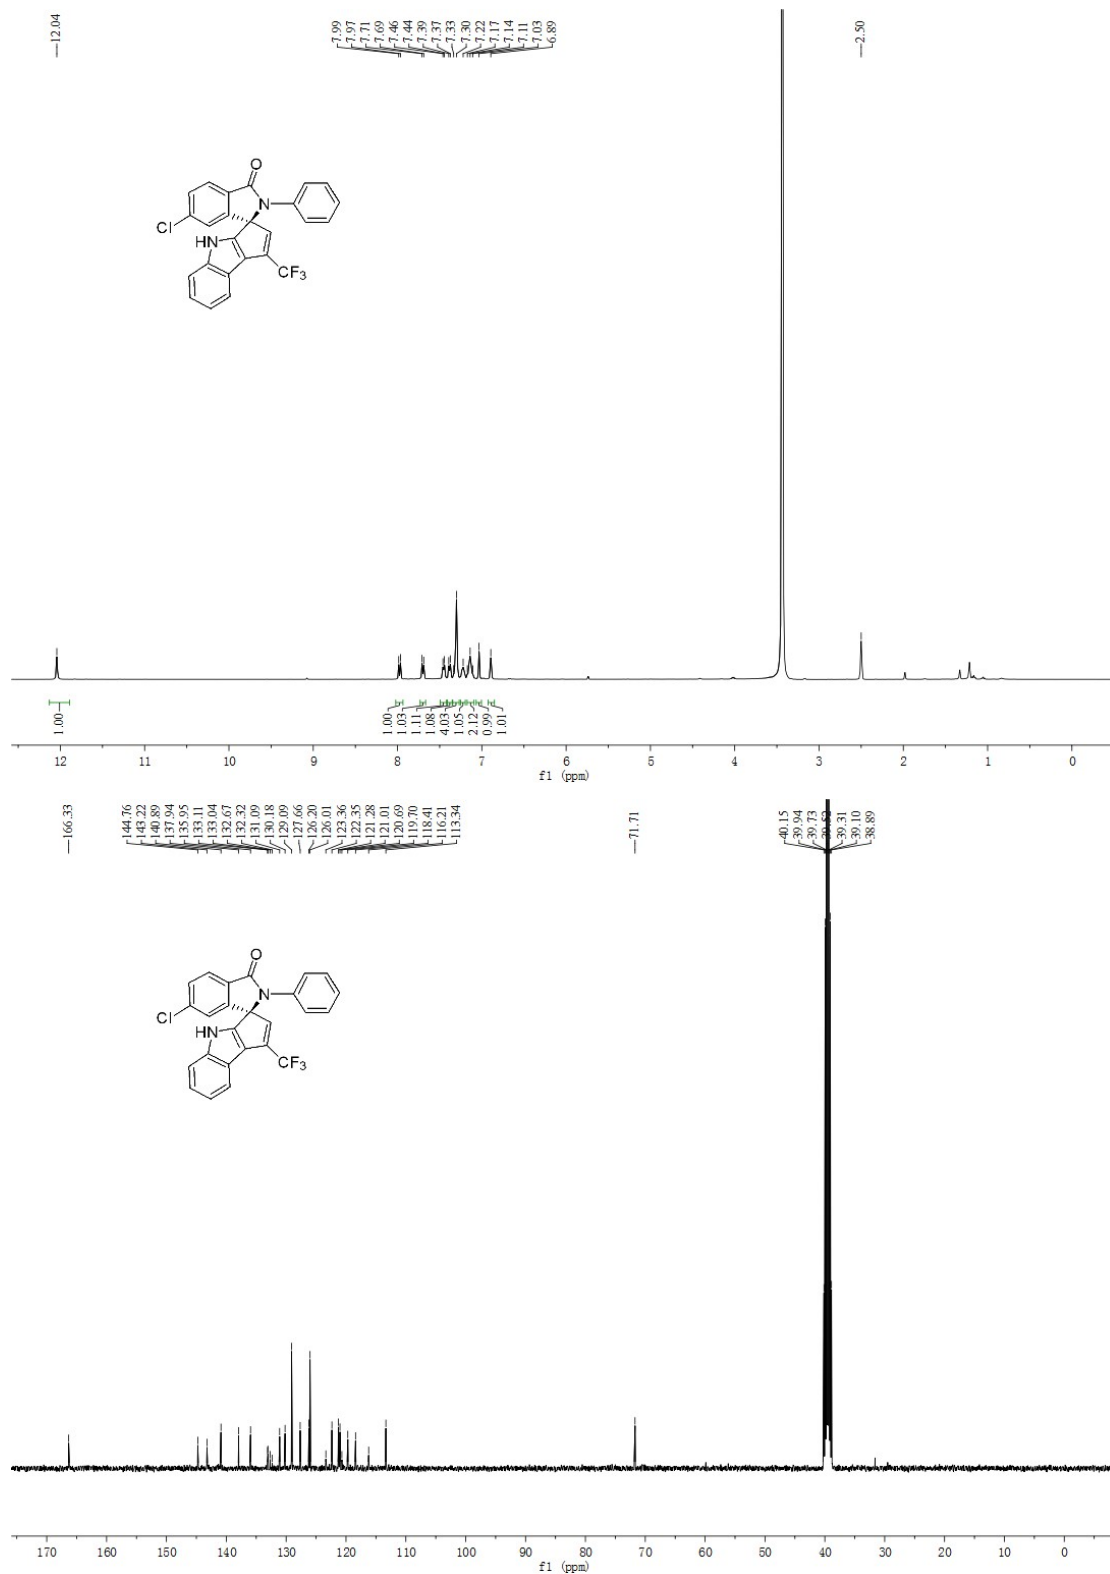

**(R)-7-chloro-2'-phenyl-1-(trifluoromethyl)-4H-spiro[cyclopenta[b]indole-3,1'-isoindolin]-3'-one (2u)**

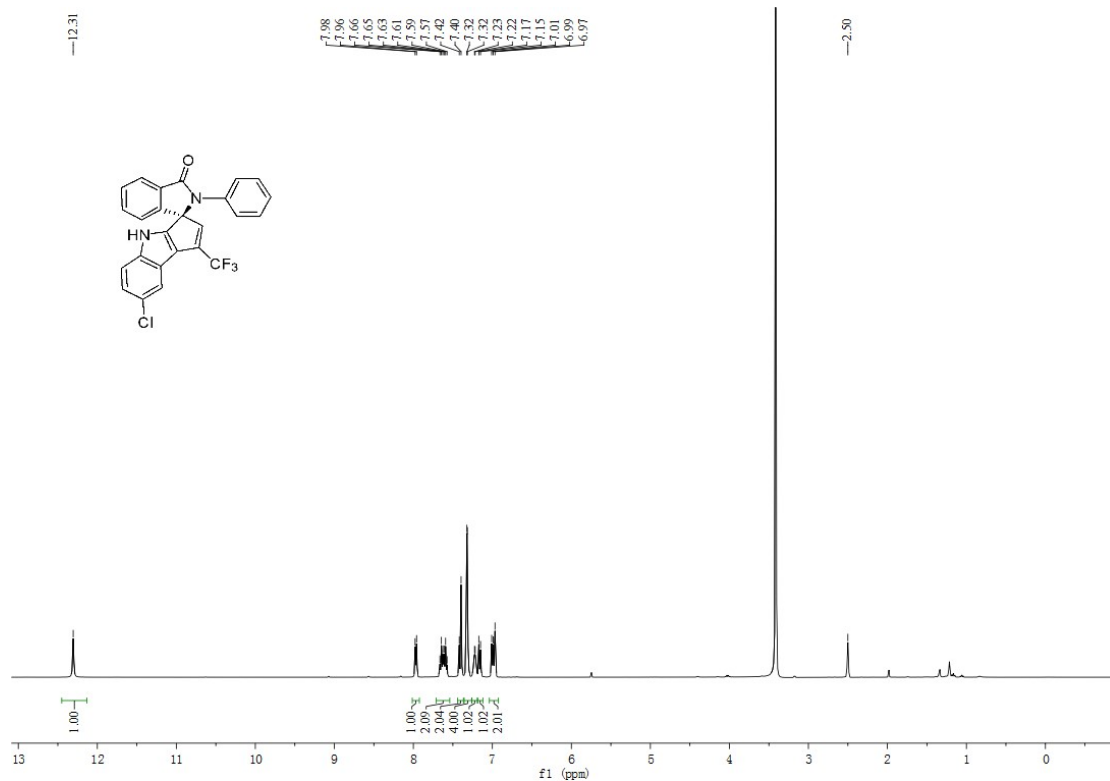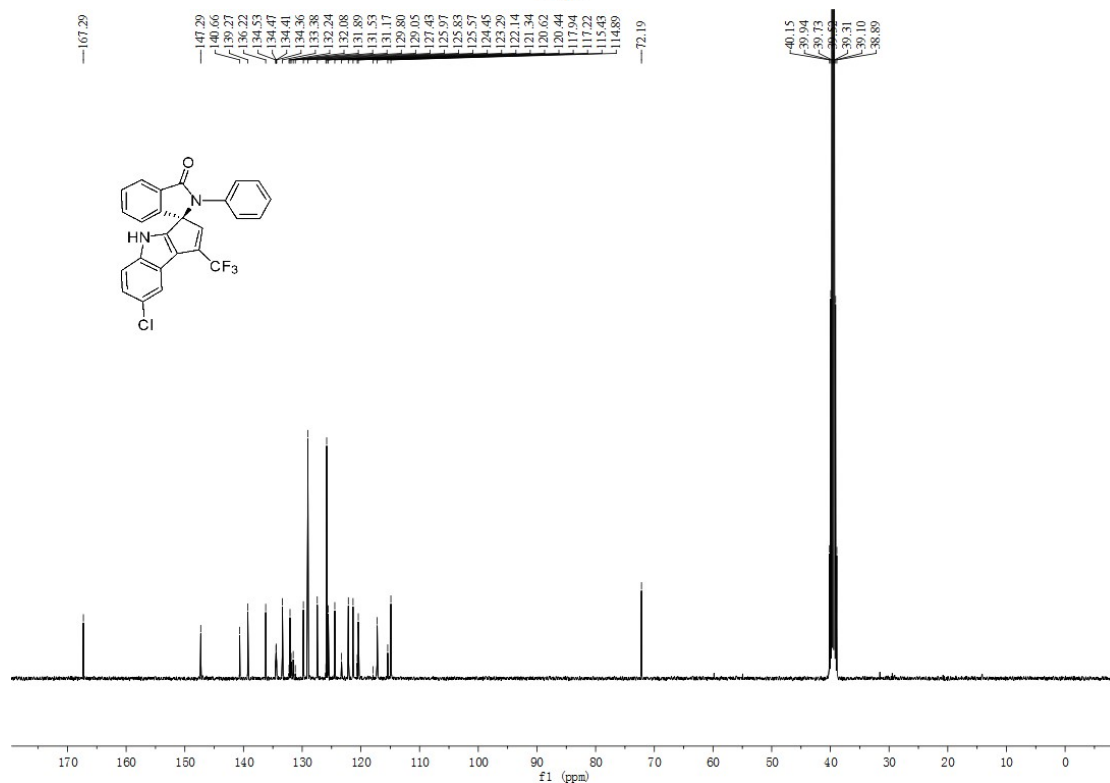

**(R)-7-bromo-2'-phenyl-1-(trifluoromethyl)-4H-spiro[cyclopenta[b]indole-3,1'-isoindolin]-3'-one (2v)**

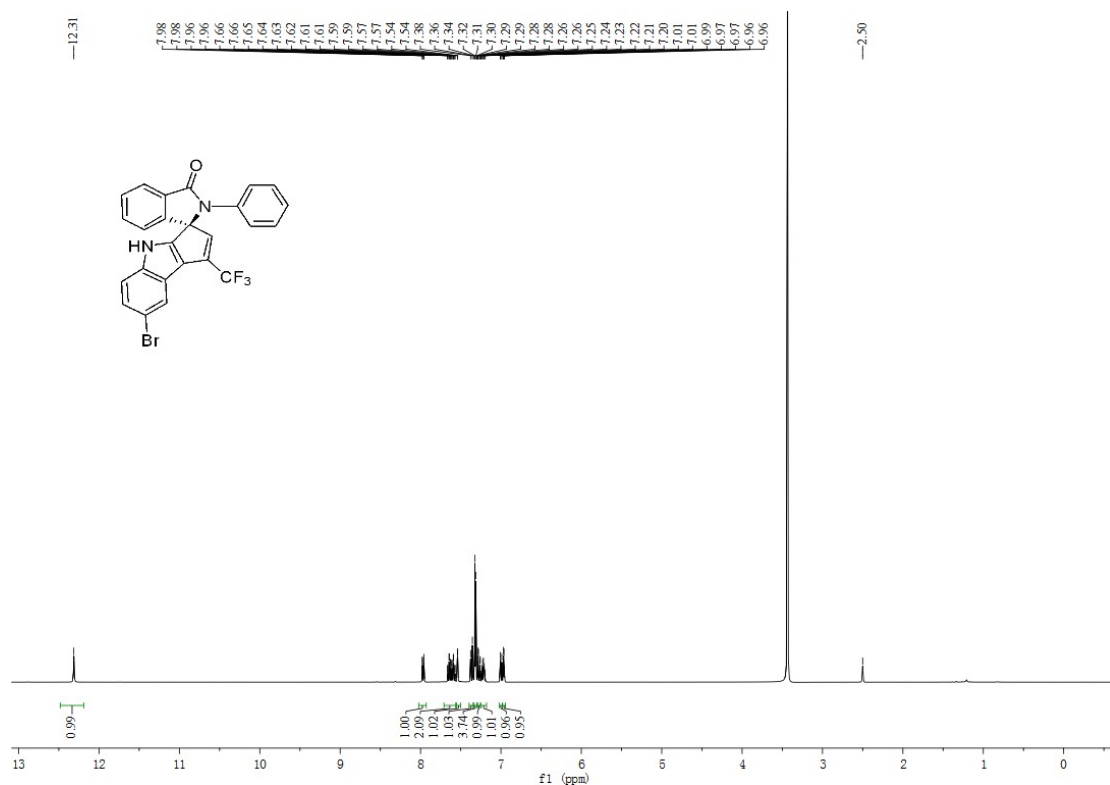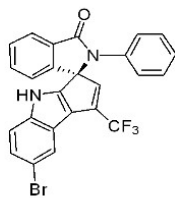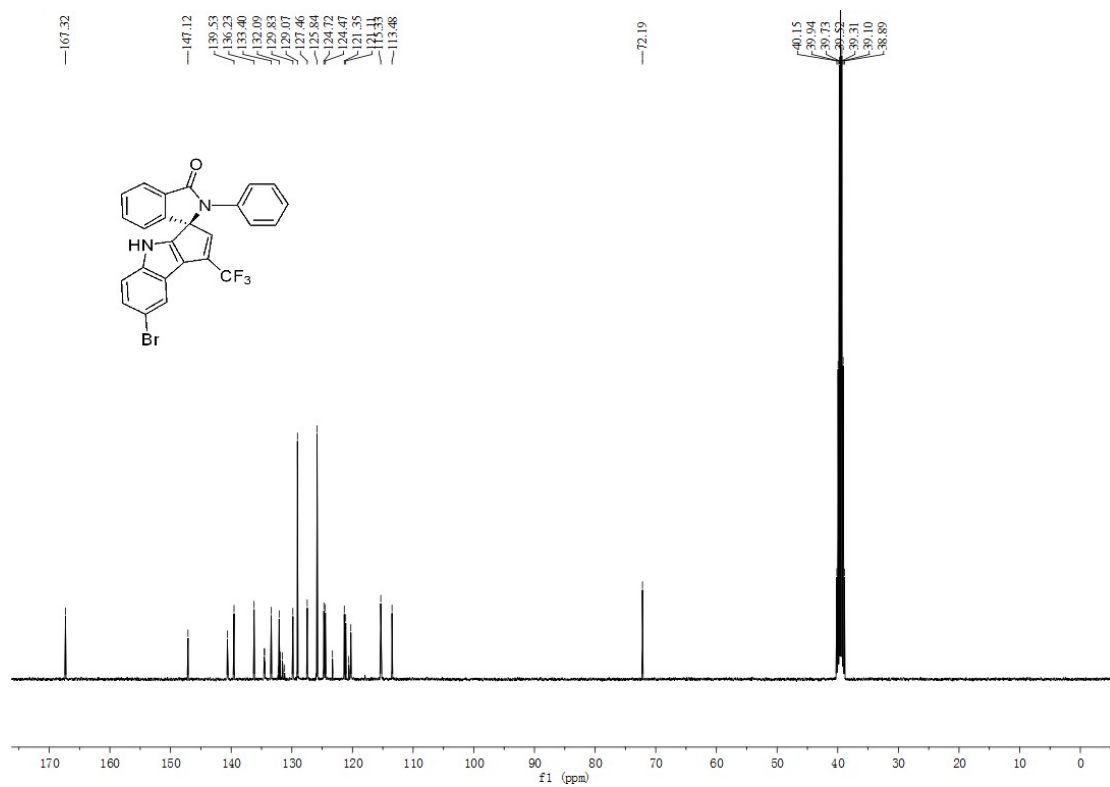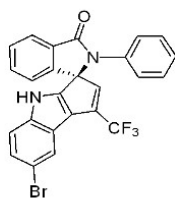

**(R)-6-methyl-2'-phenyl-1-(trifluoromethyl)-4H-spiro[cyclopenta[b]indole-3,1'-isoindolin]-3'-one (2w)**

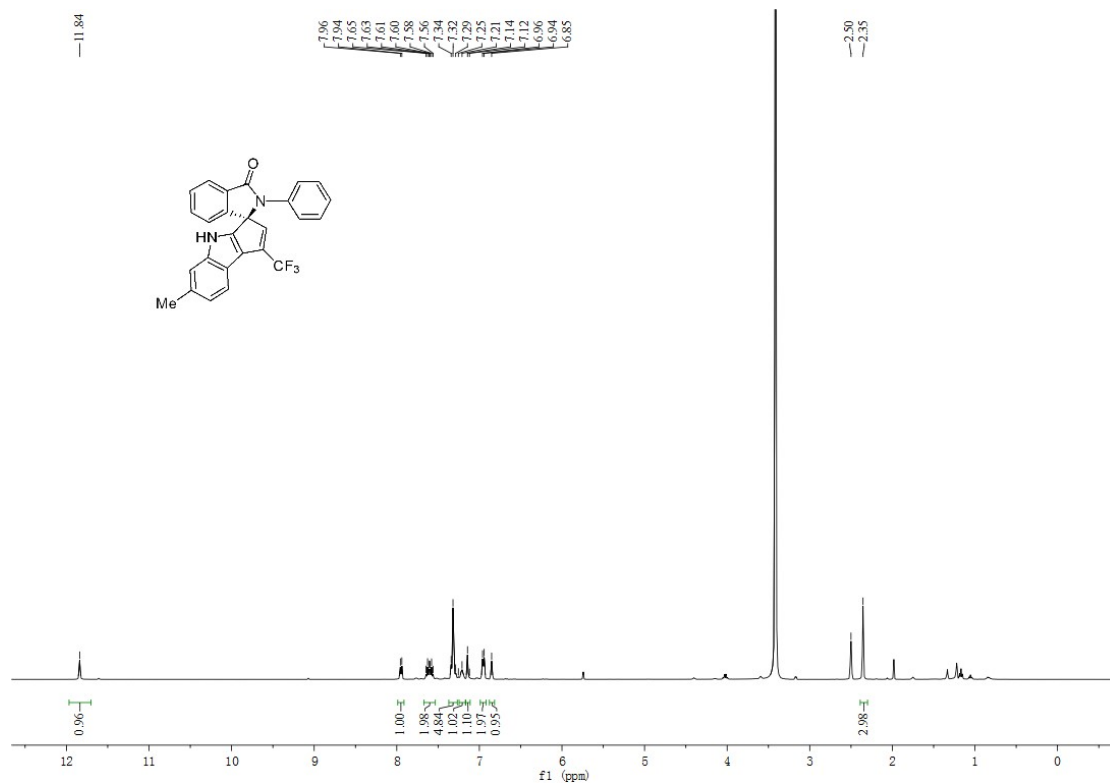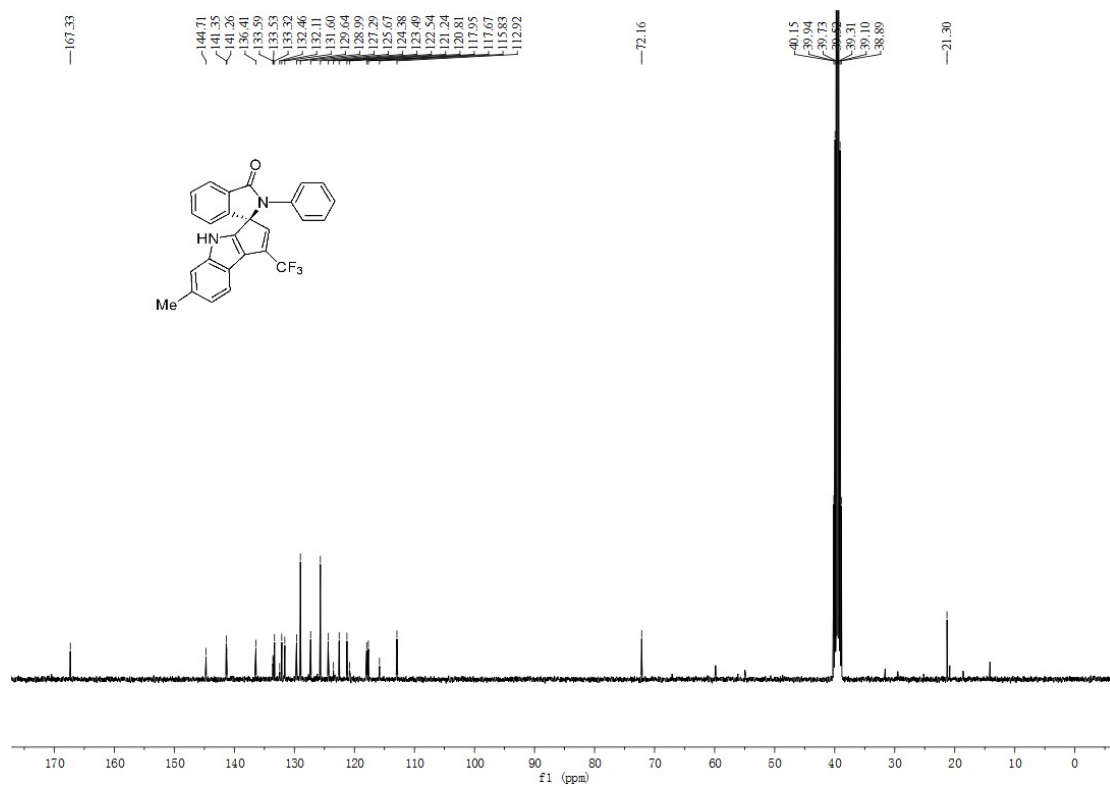

**(R)-5-methoxy-2'-phenyl-1-(trifluoromethyl)-4H-spiro[cyclopenta[b]indole-3,1'-isoindolin]-3'-one (2x)**

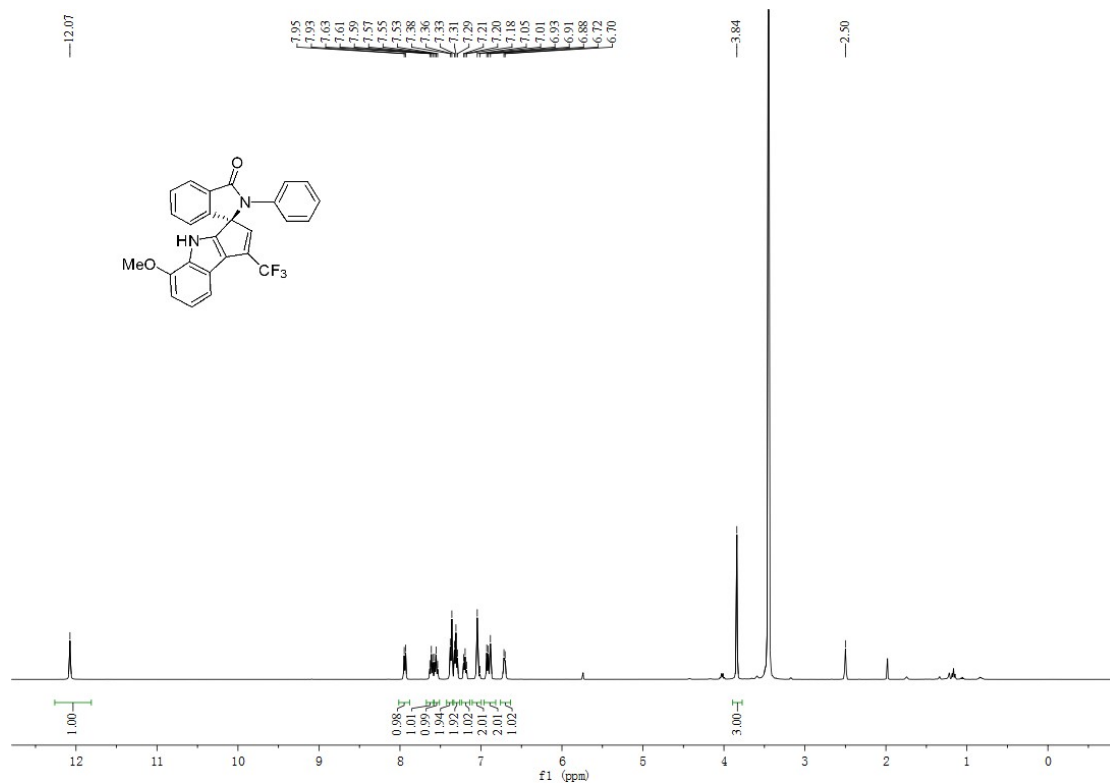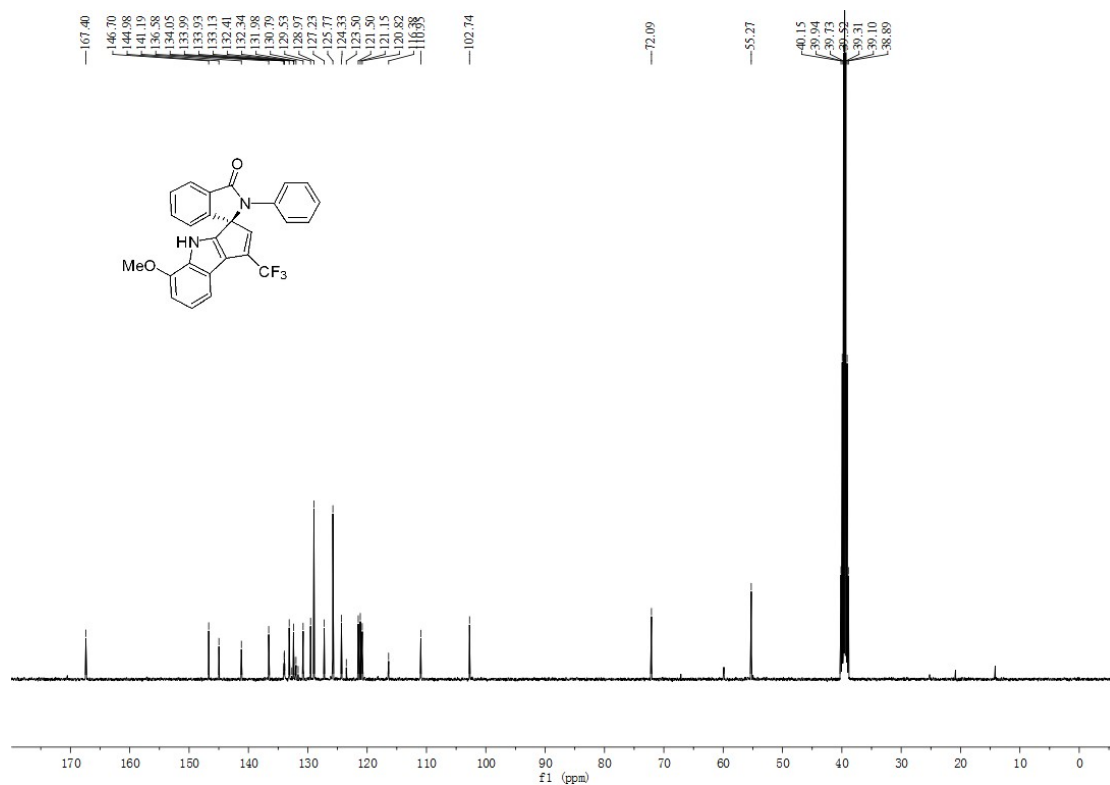



**4-Methyl-2'-phenyl-1-(trifluoromethyl)-4H-spiro[cyclopenta[b]indole-3,1'-isindolin]-3'-one (4)**

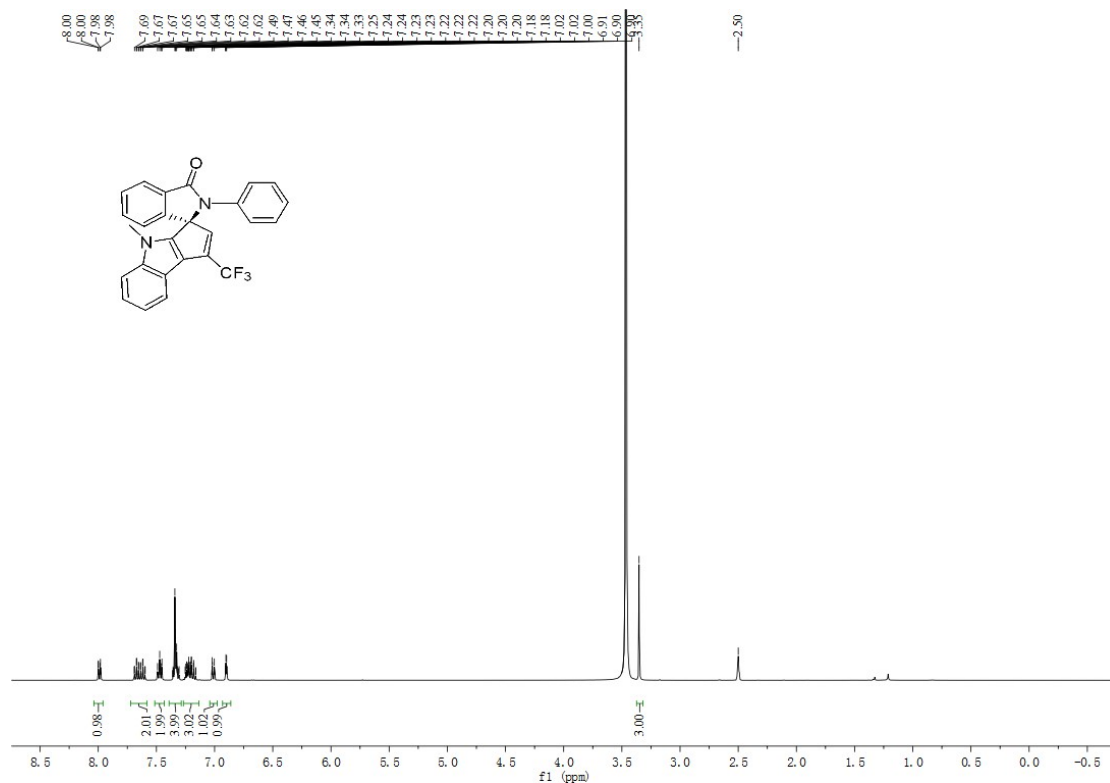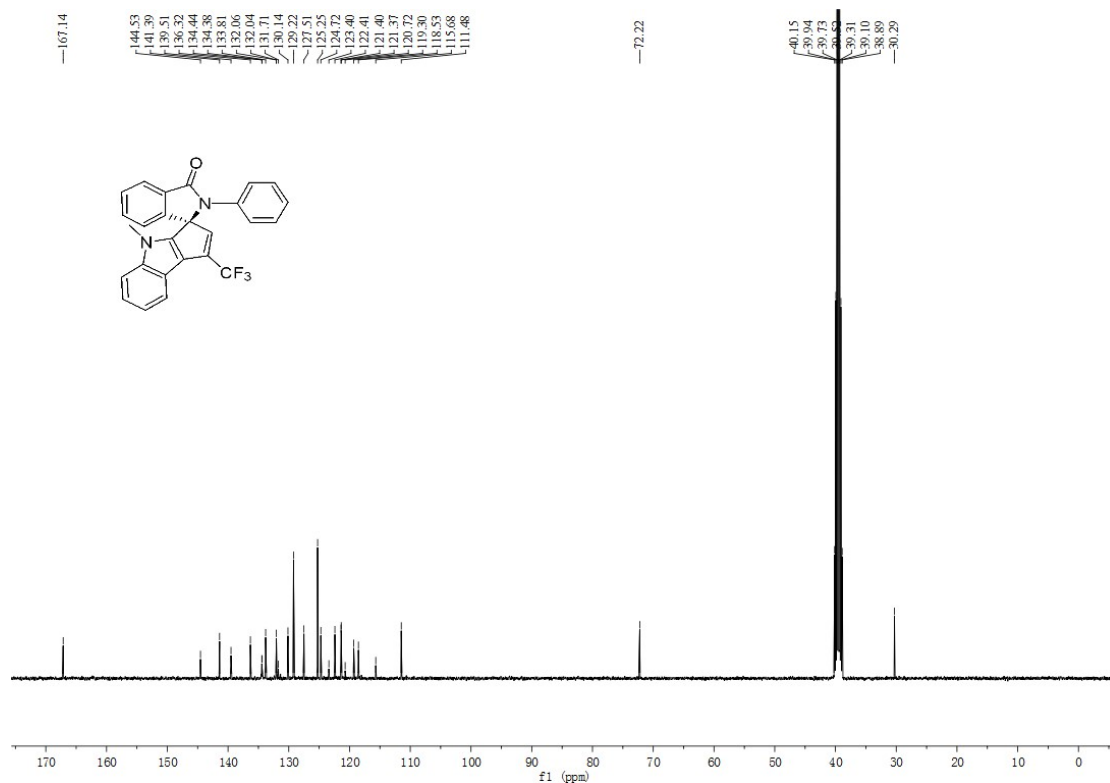

**(R)-2'-(4-bromophenyl)-1-(trifluoromethyl)-4H-spiro[cyclopenta[b]indole-3,1'-isoindoline] (6)**

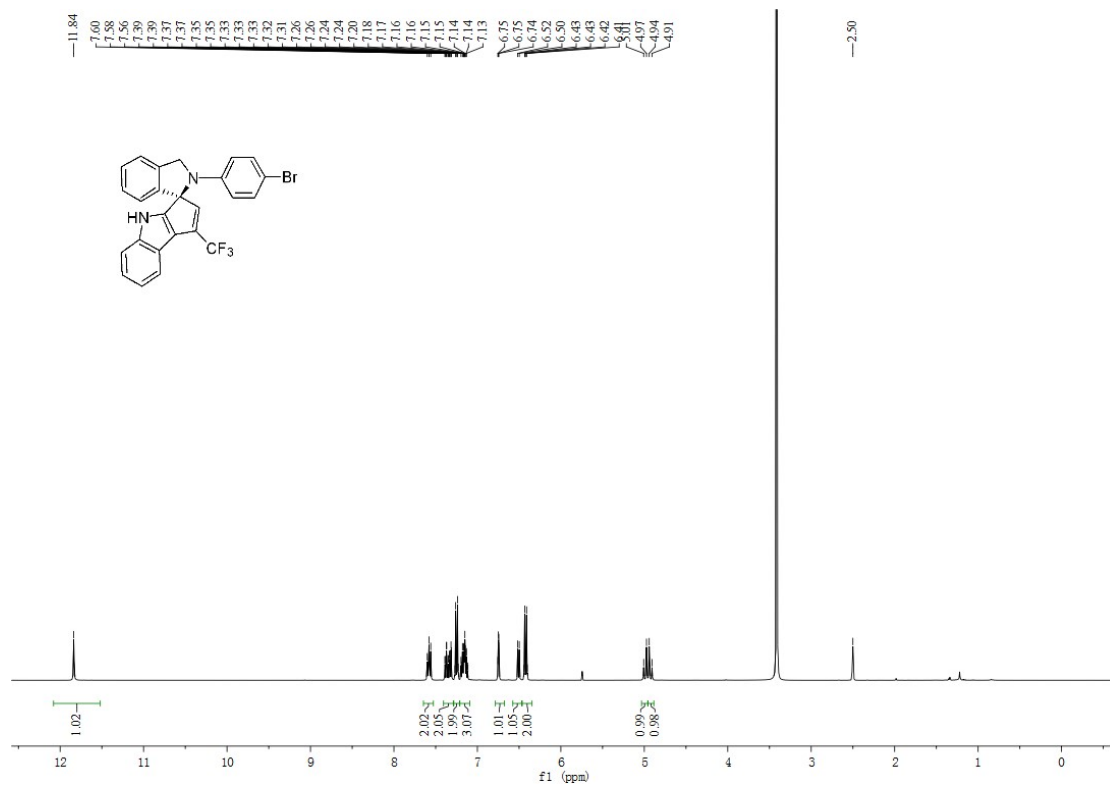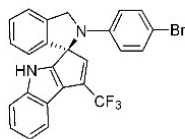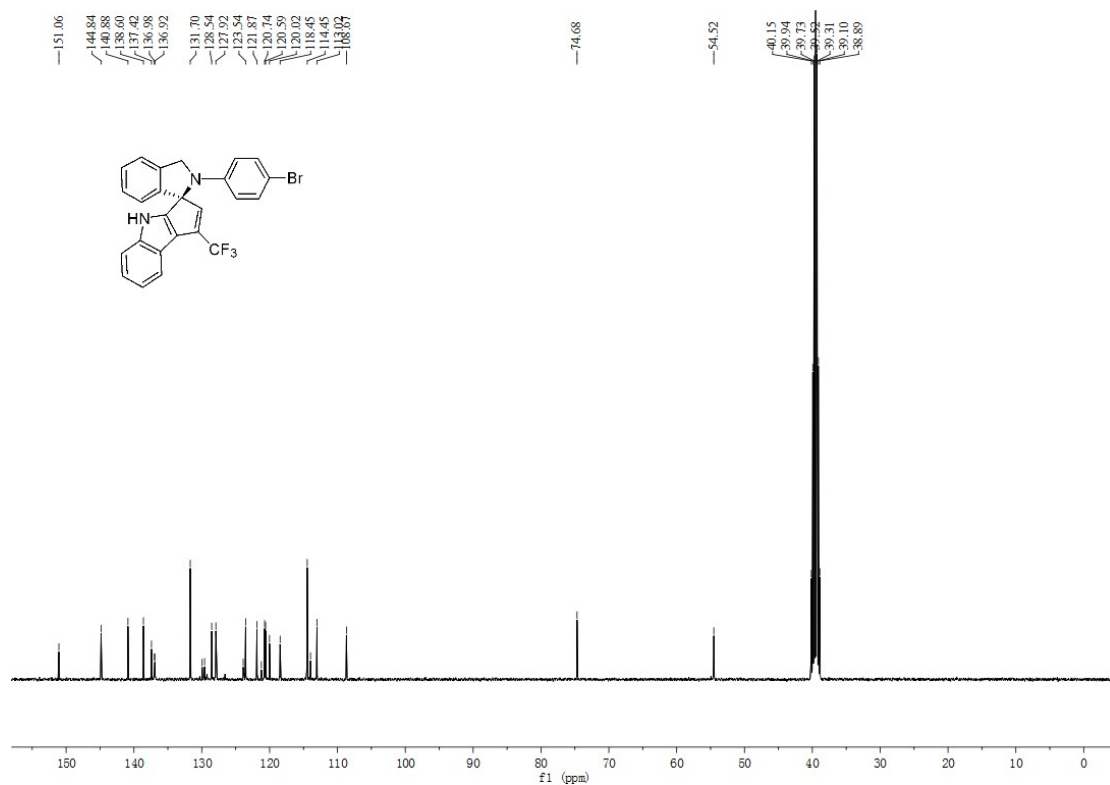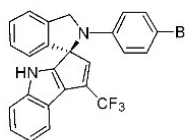

**(R)-2'-([1,1'-biphenyl]-4-yl)-1-(trifluoromethyl)-4H-spiro[cyclopenta  
[b]indole-3,1'-isoindolin]-3'-one (7)**

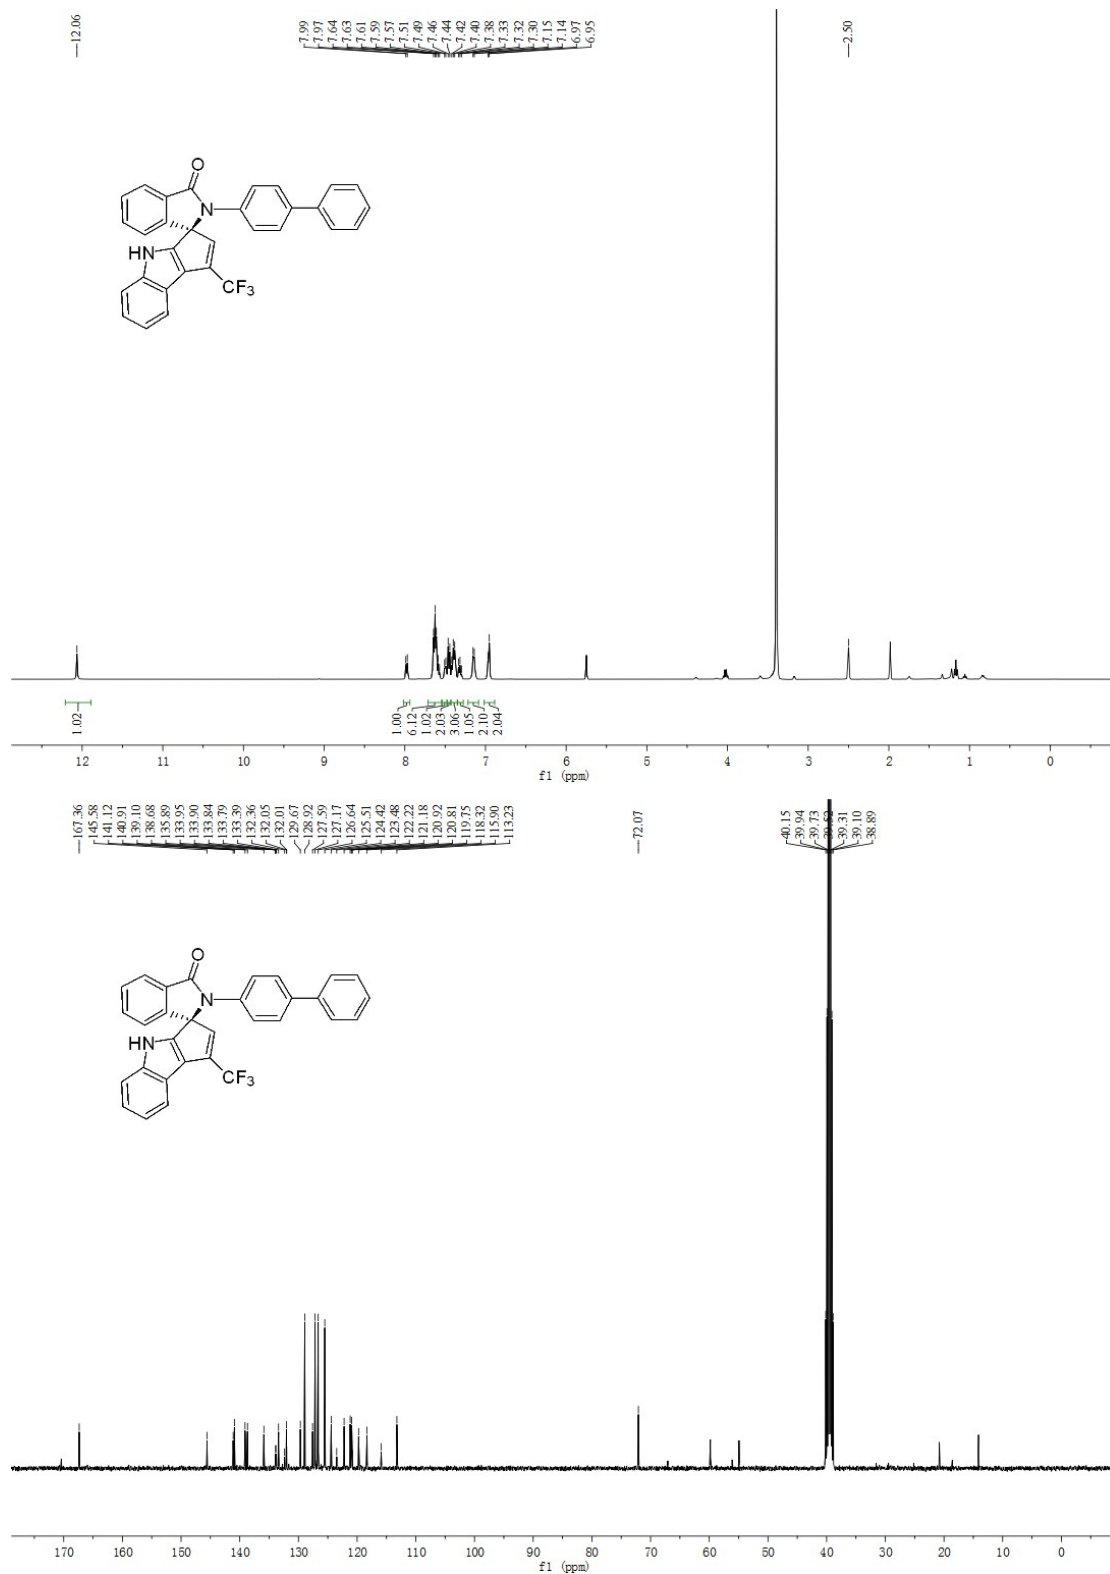

## 8. HPLC Charts of Products

### (R)-2'-phenyl-1-(trifluoromethyl)-4H-spiro[cyclopenta[b]indole-3,1'-isoindolin]-3'-one (2a)

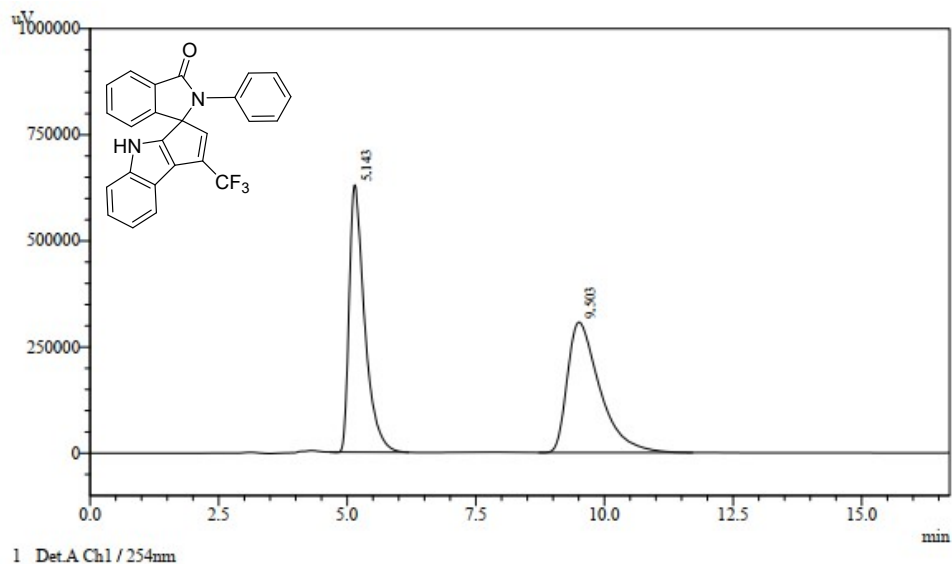

Detector A Ch1 254nm

| Peak# | Ret. Time | Area     | Height | Area %  | Height % |
|-------|-----------|----------|--------|---------|----------|
| 1     | 5.143     | 13095529 | 629595 | 49.257  | 67.223   |
| 2     | 9.503     | 13490788 | 306984 | 50.743  | 32.777   |
| Total |           | 26586317 | 936579 | 100.000 | 100.000  |

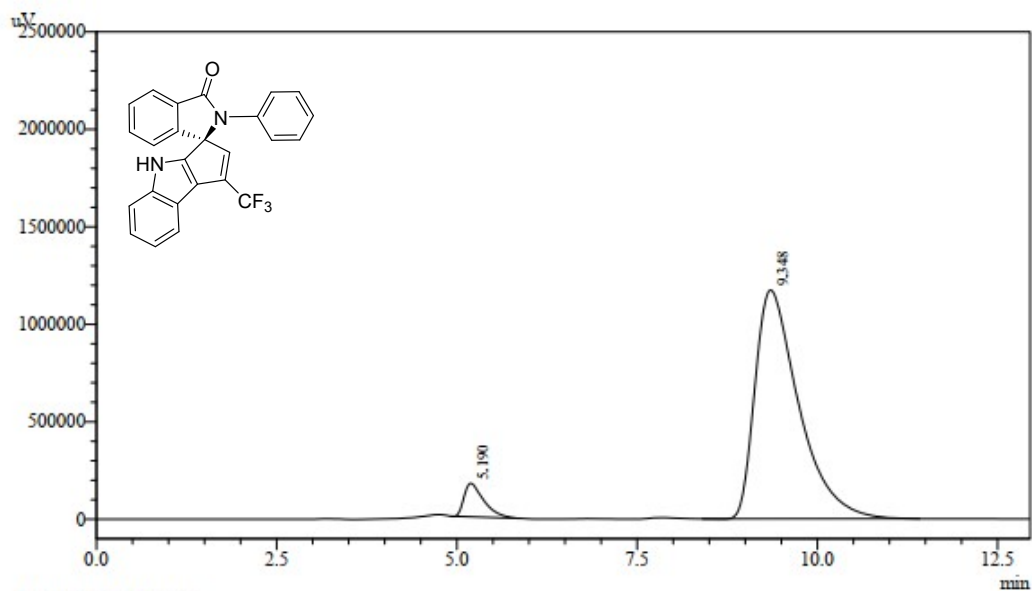

Detector A Ch1 254nm

| Peak# | Ret. Time | Area     | Height  | Area %  | Height % |
|-------|-----------|----------|---------|---------|----------|
| 1     | 5.190     | 3250318  | 171983  | 6.152   | 12.785   |
| 2     | 9.348     | 49586113 | 1173237 | 93.848  | 87.215   |
| Total |           | 52836431 | 1345220 | 100.000 | 100.000  |

**(R)-2'-(2-methoxyphenyl)-1-(trifluoromethyl)-4H-spiro[cyclopenta[b]indole-3,1'-isoindolin]-3'-one (2b)**

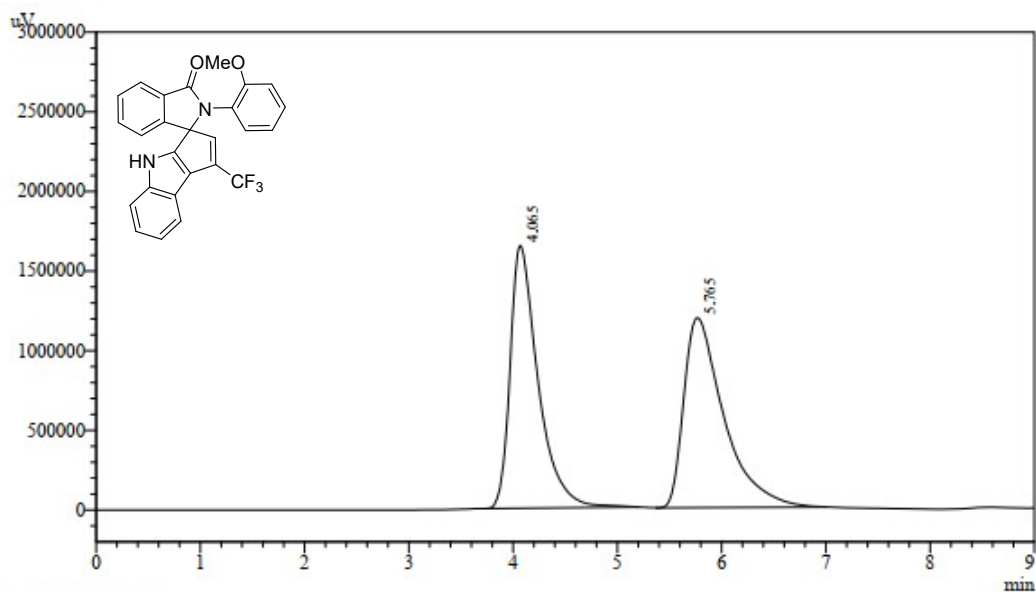

1 Det.A Ch1 / 254nm

Detector A Ch1 254nm

| Peak# | Ret. Time | Area     | Height  | Area %  | Height % |
|-------|-----------|----------|---------|---------|----------|
| 1     | 4.065     | 30738727 | 1648881 | 49.090  | 58.021   |
| 2     | 5.765     | 31878306 | 1192973 | 50.910  | 41.979   |
| Total |           | 62617033 | 2841854 | 100.000 | 100.000  |

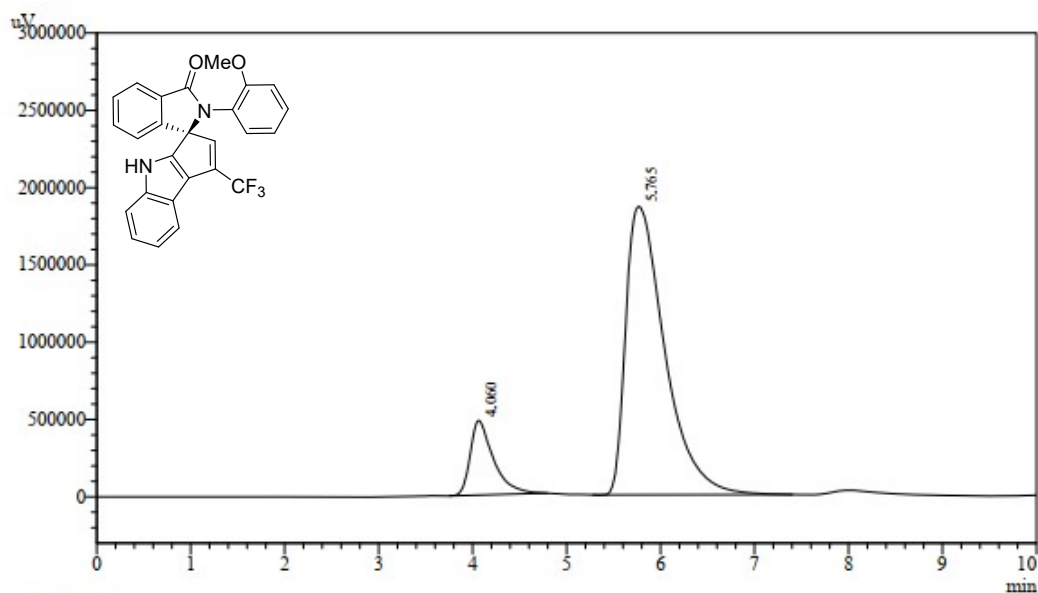

1 Det.A Ch1 / 254nm

Detector A Ch1 254nm

| Peak# | Ret. Time | Area     | Height  | Area %  | Height % |
|-------|-----------|----------|---------|---------|----------|
| 1     | 4.060     | 8271829  | 482366  | 13.295  | 20.553   |
| 2     | 5.765     | 53945818 | 1864562 | 86.705  | 79.447   |
| Total |           | 62217647 | 2346927 | 100.000 | 100.000  |

**(R)-2'-(4-methoxyphenyl)-1-(trifluoromethyl)-4H-spiro[cyclopenta[b]indole-3,1'-isoindolin]-3'-one (2c)**

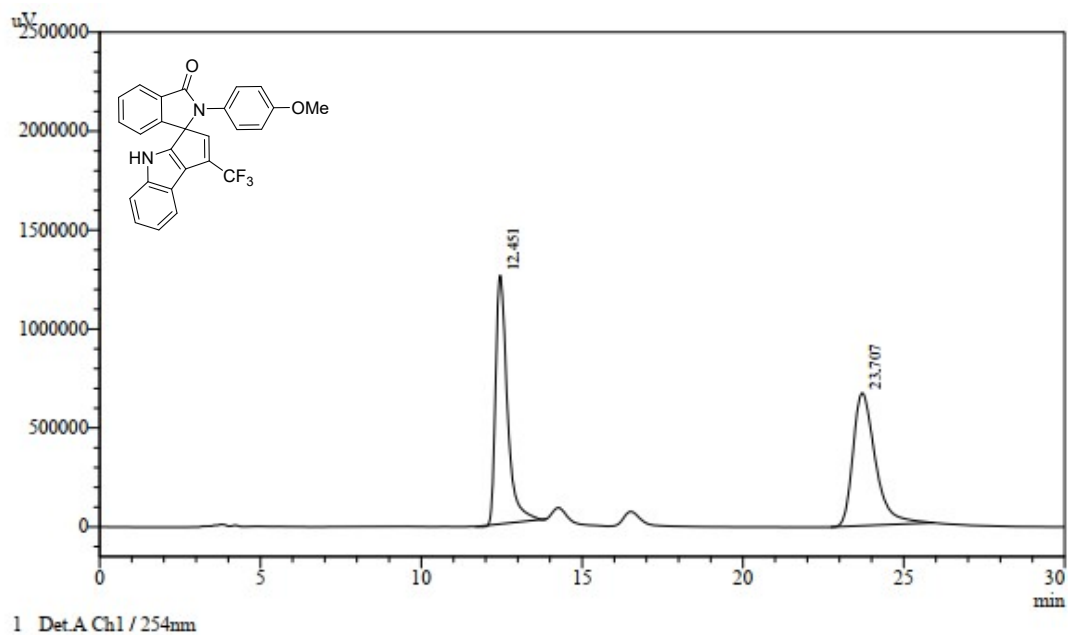

Detector A Ch1 254nm

| Peak# | Ret. Time | Area     | Height  | Area %  | Height % |
|-------|-----------|----------|---------|---------|----------|
| 1     | 12.451    | 31956379 | 1256347 | 49.488  | 65.196   |
| 2     | 23.707    | 32617772 | 670686  | 50.512  | 34.804   |
| Total |           | 64574151 | 1927033 | 100.000 | 100.000  |

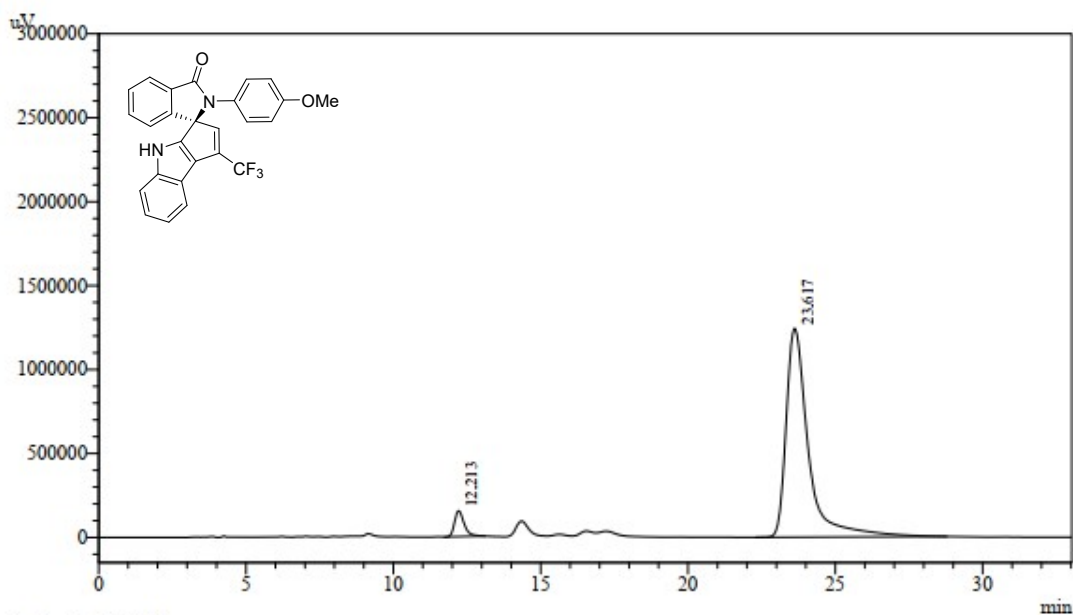

Detector A Ch1 254nm

| Peak# | Ret. Time | Area     | Height  | Area %  | Height % |
|-------|-----------|----------|---------|---------|----------|
| 1     | 12.213    | 3510553  | 153930  | 5.098   | 11.019   |
| 2     | 23.617    | 65349241 | 1243037 | 94.902  | 88.981   |
| Total |           | 68859795 | 1396966 | 100.000 | 100.000  |

**(R)-2'-(p-tolyl)-1-(trifluoromethyl)-4H-spiro[cyclopenta[b]indole-3,1'-isoindolin]-3'-one (2d)**

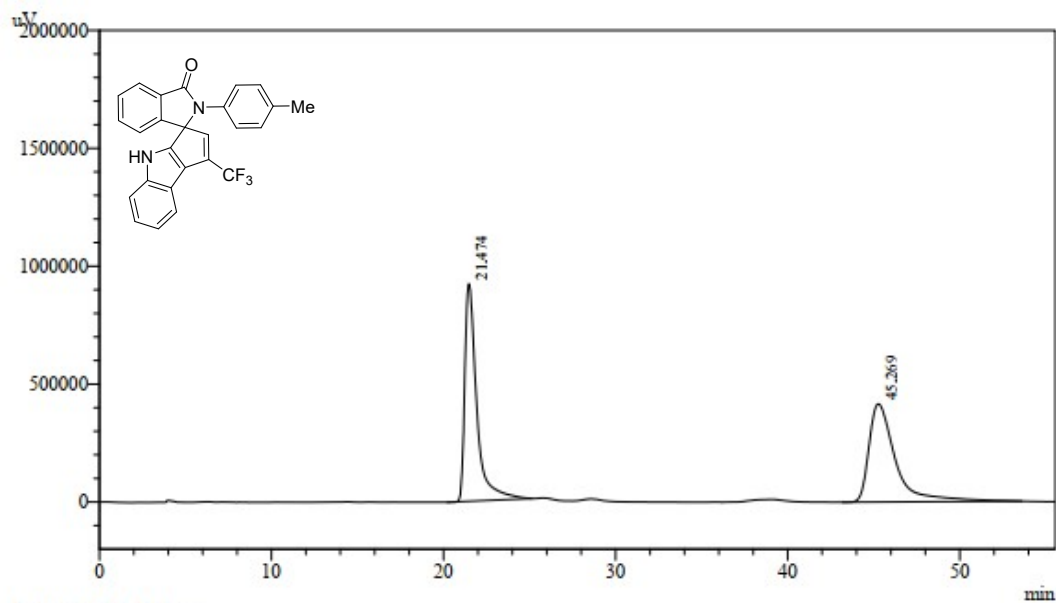

Detector A Ch1 254nm

| Peak# | Ret. Time | Area     | Height  | Area %  | Height % |
|-------|-----------|----------|---------|---------|----------|
| 1     | 21.474    | 44584011 | 922724  | 49.983  | 68.908   |
| 2     | 45.269    | 44614378 | 416344  | 50.017  | 31.092   |
| Total |           | 89198389 | 1339069 | 100.000 | 100.000  |

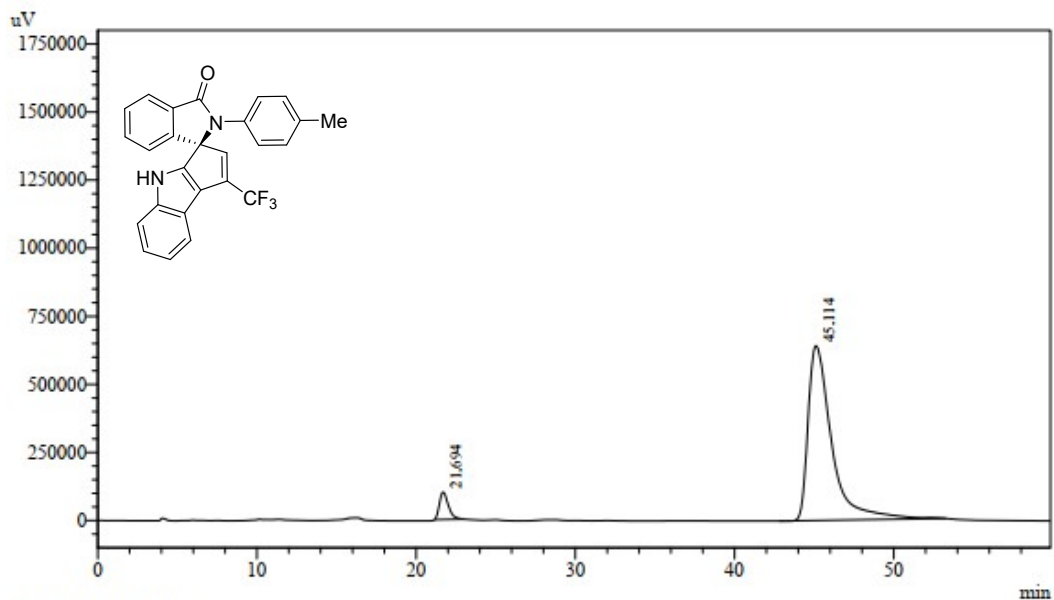

Detector A Ch1 254nm

| Peak# | Ret. Time | Area     | Height | Area %  | Height % |
|-------|-----------|----------|--------|---------|----------|
| 1     | 21.694    | 3905642  | 100455 | 5.555   | 13.544   |
| 2     | 45.114    | 66400281 | 641258 | 94.445  | 86.456   |
| Total |           | 70305922 | 741713 | 100.000 | 100.000  |

**(R)-2'-(4-chlorophenyl)-1-(trifluoromethyl)-4H-spiro[cyclopenta[b]indole-3,1'-isoindolin]-3'-one (2e)**

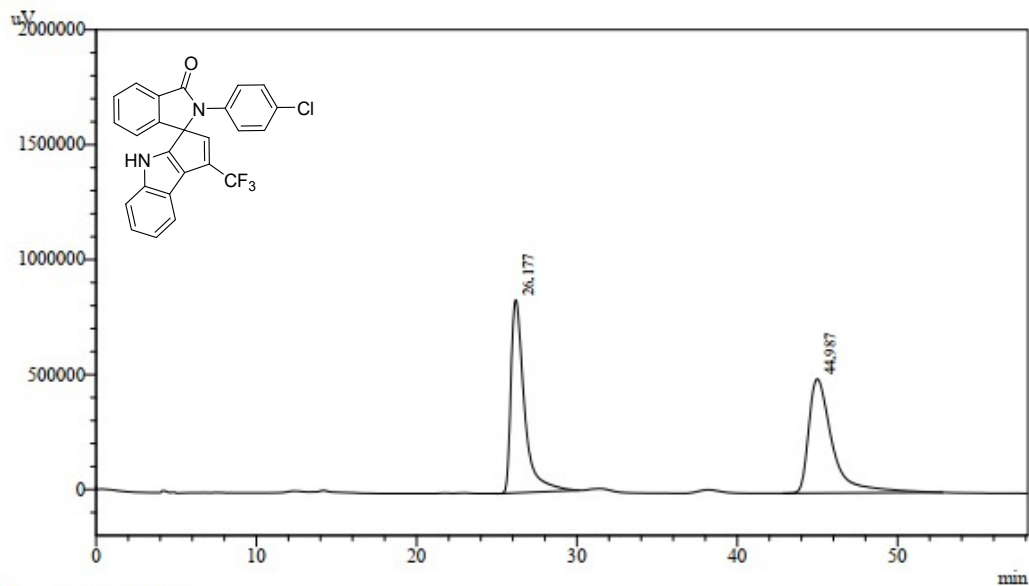

1 Det.A Ch1 / 254nm

Detector A Ch1 254nm

| Peak# | Ret. Time | Area      | Height  | Area %  | Height % |
|-------|-----------|-----------|---------|---------|----------|
| 1     | 26.177    | 49275738  | 839476  | 49.045  | 62.843   |
| 2     | 44.987    | 51194444  | 496362  | 50.955  | 37.157   |
| Total |           | 100470182 | 1335838 | 100.000 | 100.000  |

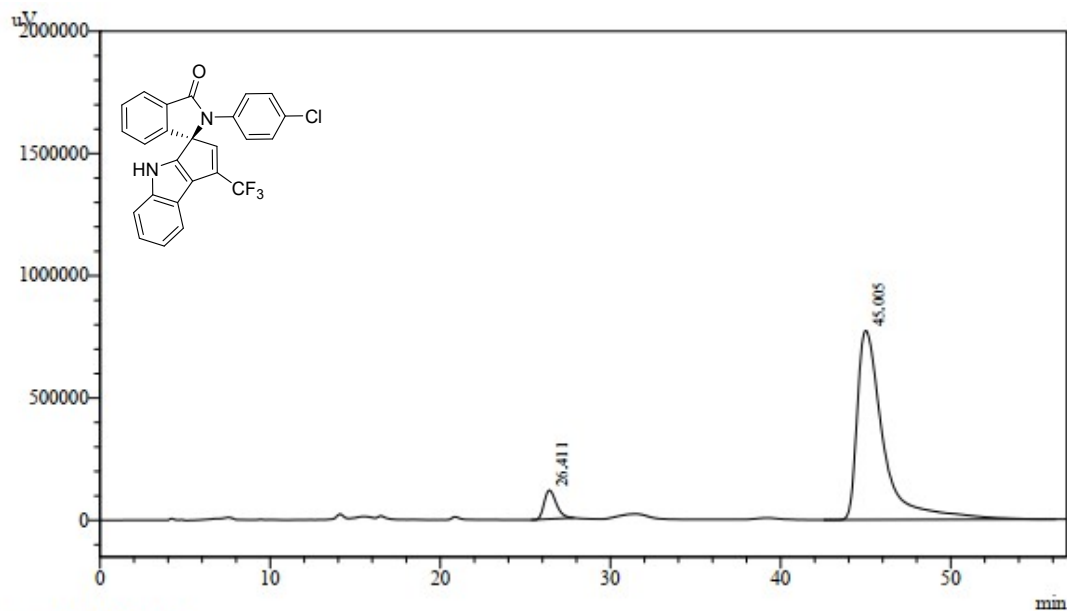

1 Det.A Ch1 / 254nm

Detector A Ch1 254nm

| Peak# | Ret. Time | Area     | Height | Area %  | Height % |
|-------|-----------|----------|--------|---------|----------|
| 1     | 26.411    | 5846609  | 117459 | 6.582   | 13.183   |
| 2     | 45.005    | 82986272 | 773537 | 93.418  | 86.817   |
| Total |           | 88832881 | 890995 | 100.000 | 100.000  |



**(R)-2'-(4-(tert-butyl)phenyl)-1-(trifluoromethyl)-4H-spiro[cyclopenta[b]indole-3,1'-isoindolin]-3'-one (2f)**

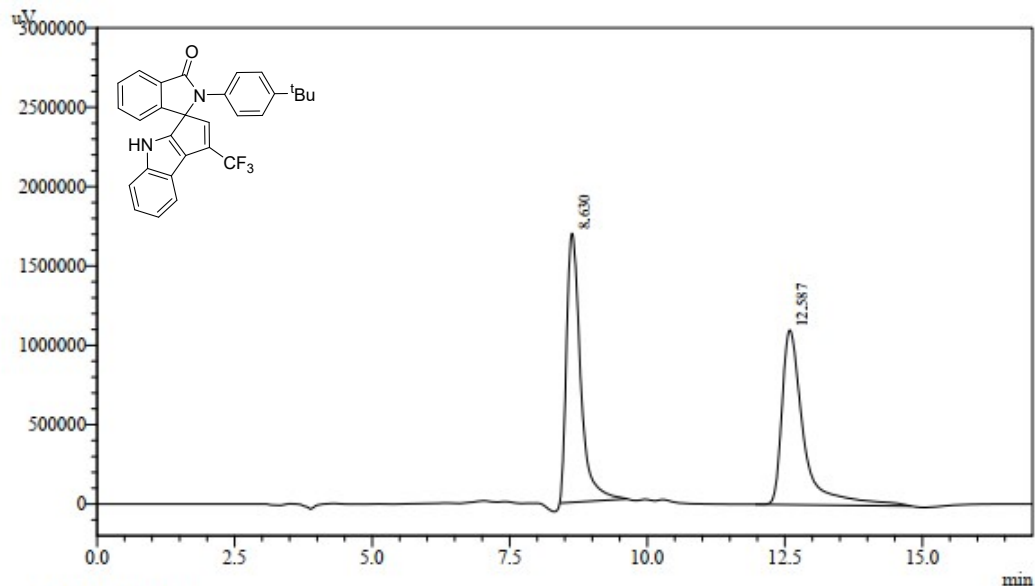

1 Det.A Ch1 / 254nm

Detector A Ch1 254nm

| Peak# | Ret. Time | Area     | Height  | Area %  | Height % |
|-------|-----------|----------|---------|---------|----------|
| 1     | 8.630     | 30089291 | 1695291 | 49.864  | 60.647   |
| 2     | 12.587    | 30253299 | 1100040 | 50.136  | 39.353   |
| Total |           | 60342590 | 2795331 | 100.000 | 100.000  |

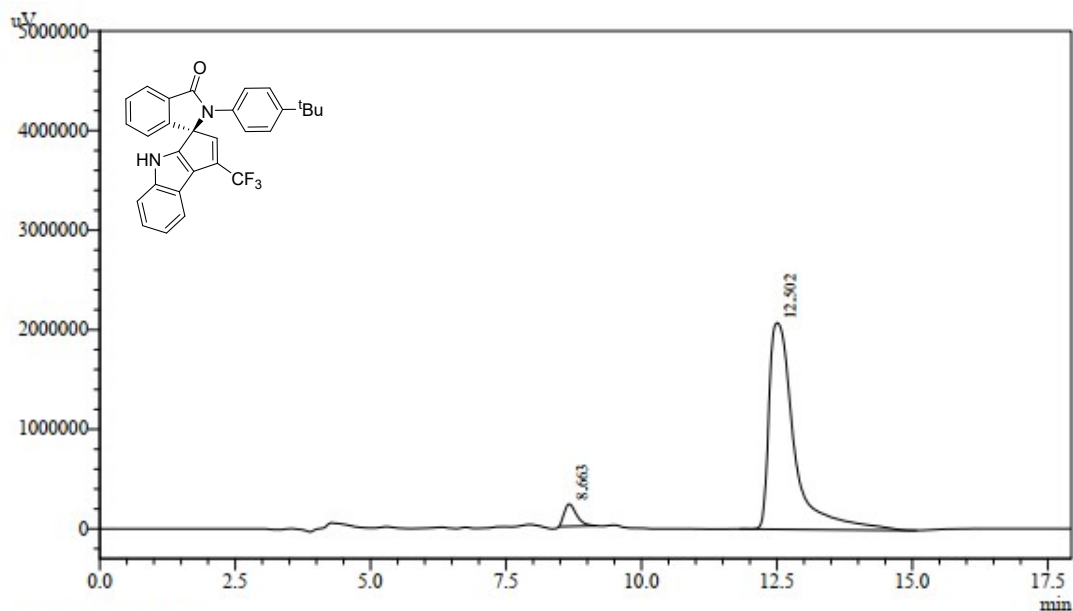

1 Det.A Ch1 / 254nm

Detector A Ch1 254nm

| Peak# | Ret. Time | Area     | Height  | Area %  | Height % |
|-------|-----------|----------|---------|---------|----------|
| 1     | 8.663     | 3580101  | 224780  | 5.035   | 9.782    |
| 2     | 12.502    | 67526732 | 2073153 | 94.965  | 90.218   |
| Total |           | 71106832 | 2297933 | 100.000 | 100.000  |

**(R)-2'-(4-bromophenyl)-1-(trifluoromethyl)-4H-spiro[cyclopenta[b]indole-3,1'-isoindolin]-3'-one (2g)**

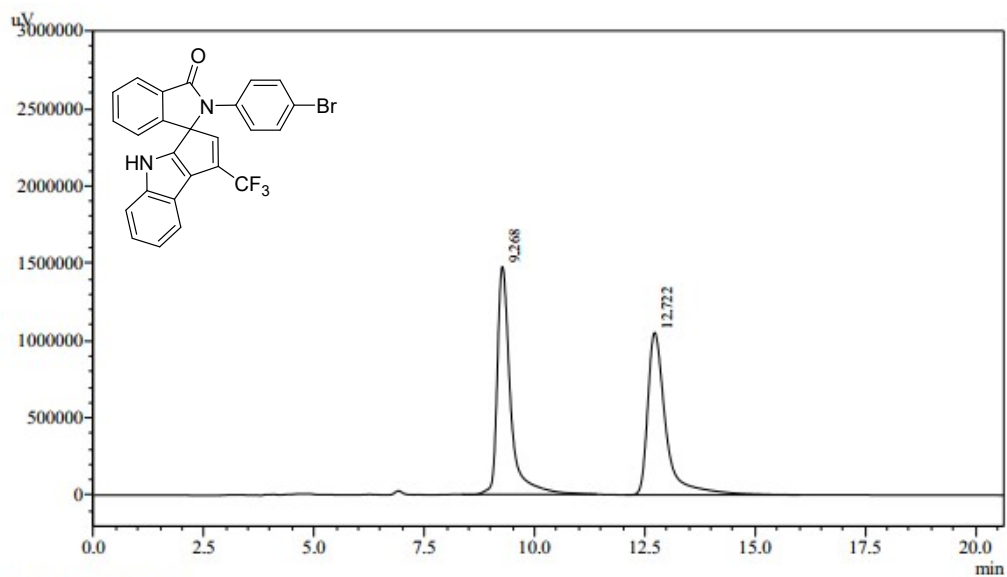

1 Det.A Ch1 / 254nm

Detector A Ch1 254nm

| Peak# | Ret. Time | Area     | Height  | Area %  | Height % |
|-------|-----------|----------|---------|---------|----------|
| 1     | 9.268     | 30840754 | 1472927 | 50.583  | 58.406   |
| 2     | 12.722    | 30130085 | 1048960 | 49.417  | 41.594   |
| Total |           | 60970839 | 2521887 | 100.000 | 100.000  |

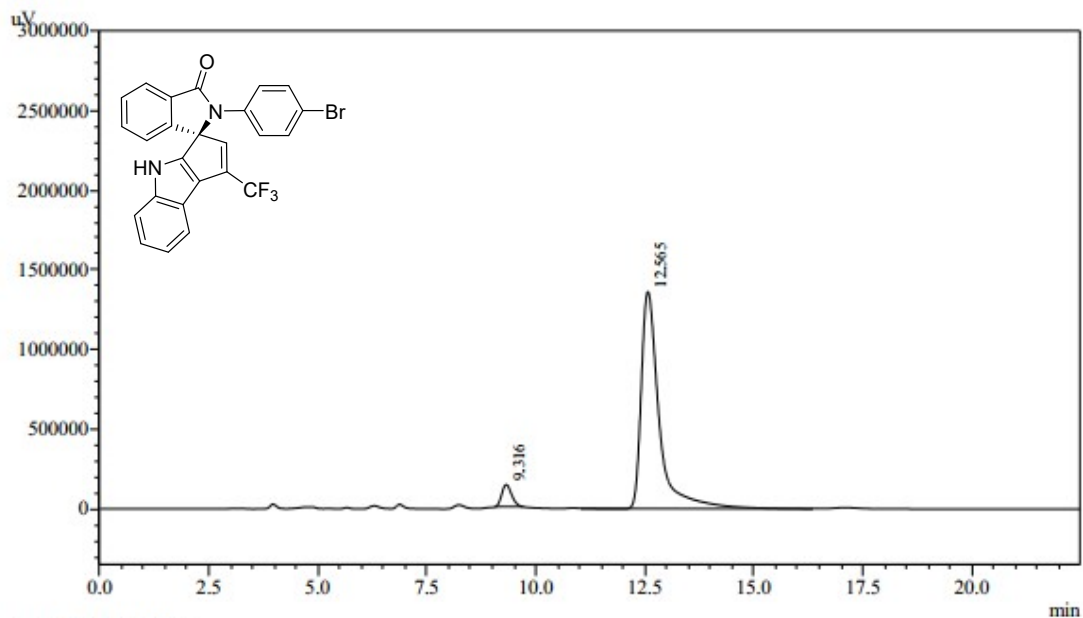

1 Det.A Ch1 / 254nm

Detector A Ch1 254nm

| Peak# | Ret. Time | Area     | Height  | Area %  | Height % |
|-------|-----------|----------|---------|---------|----------|
| 1     | 9.316     | 2153351  | 137617  | 5.243   | 9.178    |
| 2     | 12.565    | 38920425 | 1361742 | 94.757  | 90.822   |
| Total |           | 41073776 | 1499359 | 100.000 | 100.000  |

Ethyl

(R)-4-(3'-oxo-1-(trifluoromethyl)-4H-

spiro[cyclopenta[b]indole- 3,1'-isoindolin]-2'-yl)benzoate (2h)

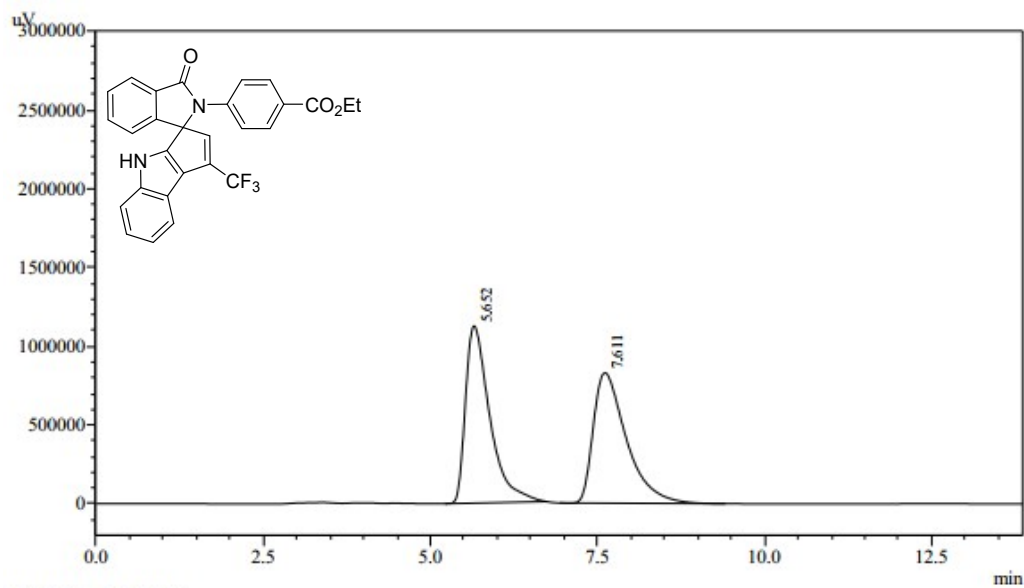

1 Det.A Ch1 / 254nm

Detector A Ch1 254nm

| Peak# | Ret. Time | Area     | Height  | Area %  | Height % |
|-------|-----------|----------|---------|---------|----------|
| 1     | 5.652     | 28438237 | 1123804 | 49.869  | 57.592   |
| 2     | 7.611     | 28588014 | 827504  | 50.131  | 42.408   |
| Total |           | 57026251 | 1951307 | 100.000 | 100.000  |

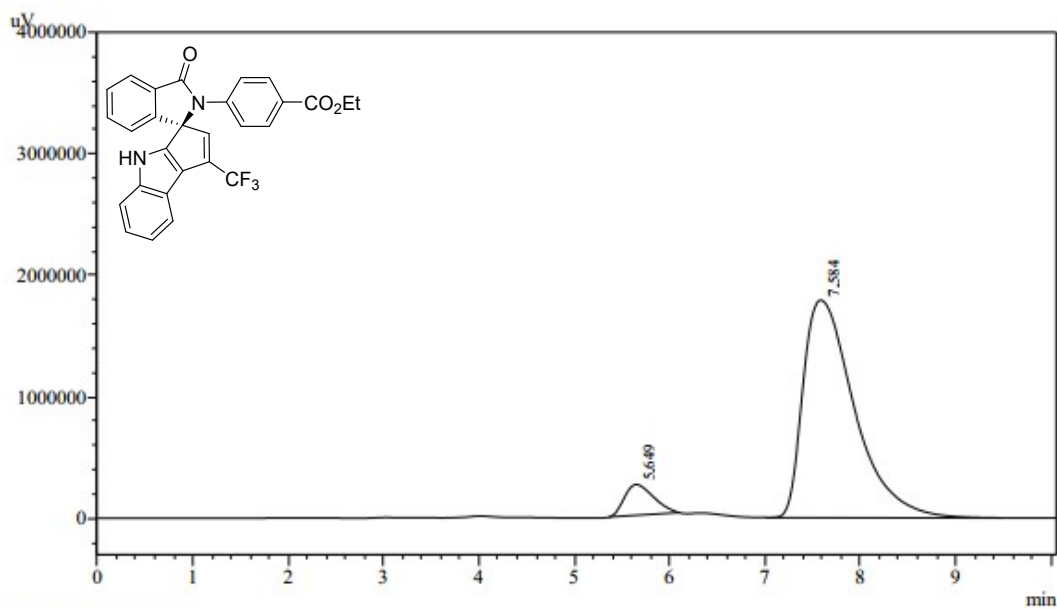

1 Det.A Ch1 / 254nm

Detector A Ch1 254nm

| Peak# | Ret. Time | Area     | Height  | Area %  | Height % |
|-------|-----------|----------|---------|---------|----------|
| 1     | 5.649     | 5347402  | 253212  | 7.373   | 12.387   |
| 2     | 7.584     | 67184291 | 1790993 | 92.627  | 87.613   |
| Total |           | 72531692 | 2044205 | 100.000 | 100.000  |

**(R)-2'-(2-nitrophenyl)-1-(trifluoromethyl)-4H-spiro[cyclopenta[b]indole-3,1'-isoindolin]-3'-one (2i)**

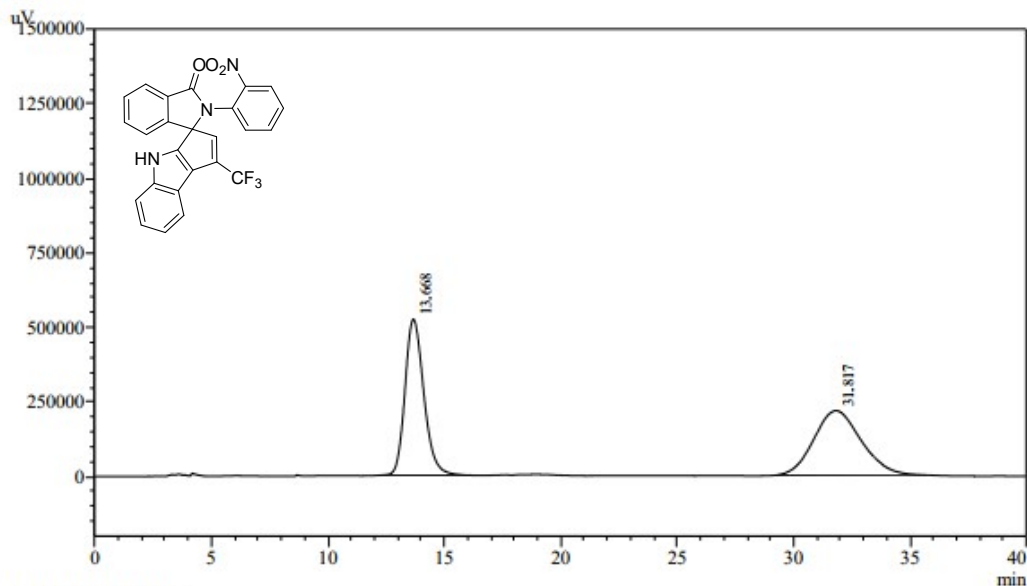

1 Det.A Ch1 / 254nm

Detector A Ch1 254nm

| Peak# | Ret. Time | Area     | Height | Area %  | Height % |
|-------|-----------|----------|--------|---------|----------|
| 1     | 13.668    | 29470790 | 523199 | 49.109  | 70.753   |
| 2     | 31.817    | 30540323 | 216276 | 50.891  | 29.247   |
| Total |           | 60011113 | 739476 | 100.000 | 100.000  |

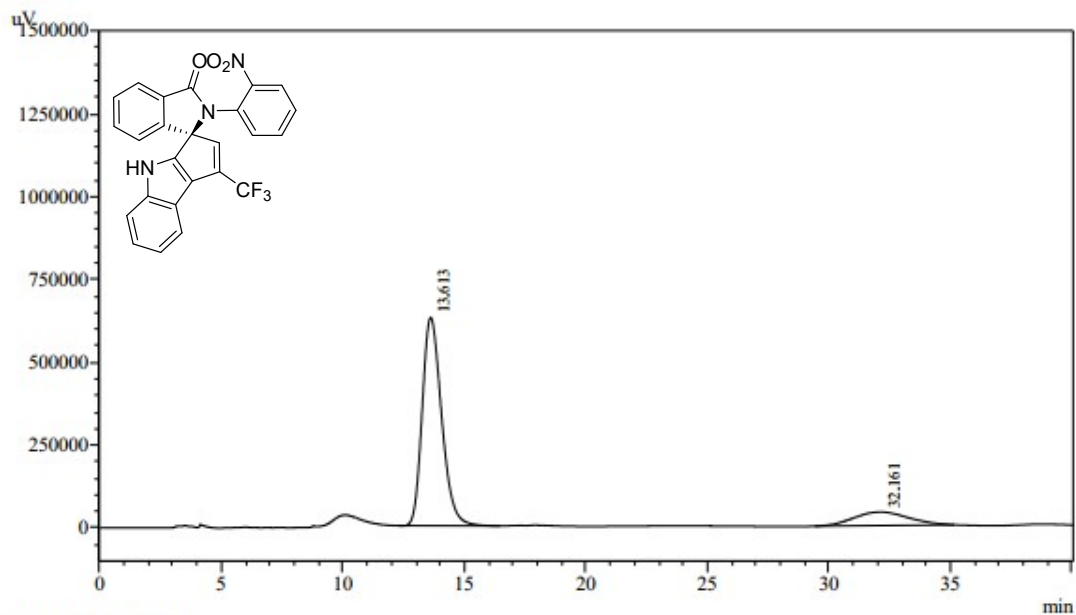

1 Det.A Ch1 / 254nm

Detector A Ch1 254nm

| Peak# | Ret. Time | Area     | Height | Area %  | Height % |
|-------|-----------|----------|--------|---------|----------|
| 1     | 13.613    | 34963141 | 628836 | 84.598  | 93.889   |
| 2     | 32.161    | 6365355  | 40930  | 15.402  | 6.111    |
| Total |           | 41328495 | 669766 | 100.000 | 100.000  |

**(R)-2'-(naphthalen-2-yl)-1-(trifluoromethyl)-4H-spiro[cyclopenta[b]indole-3,1'-isoindolin]-3'-one (2j)**

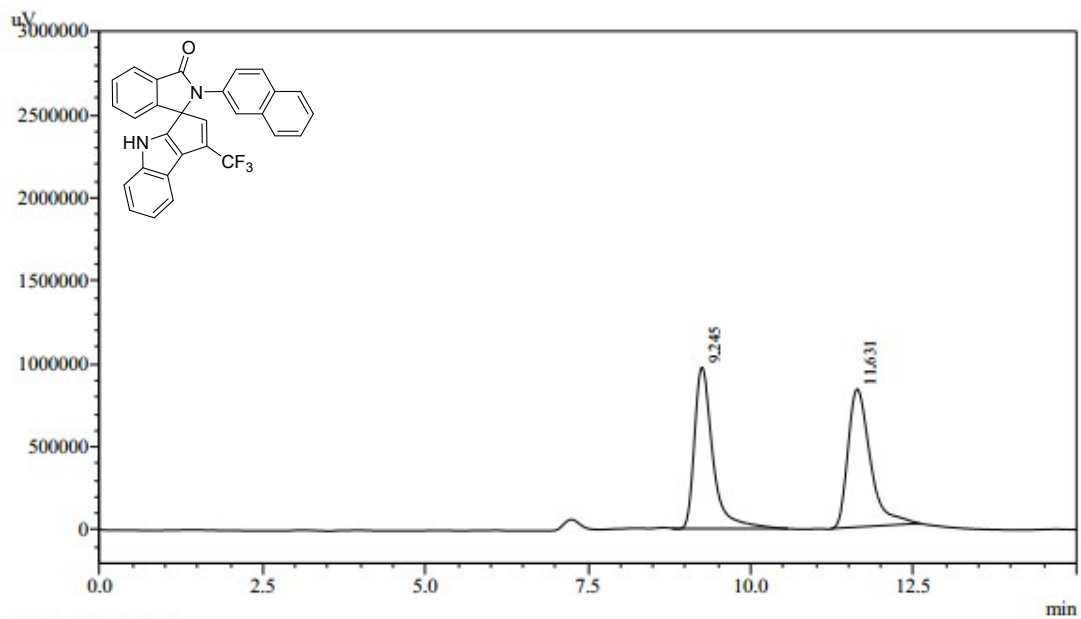

Detector A Ch1 254nm

| Peak# | Ret. Time | Area     | Height  | Area %  | Height % |
|-------|-----------|----------|---------|---------|----------|
| 1     | 9.245     | 19170886 | 969979  | 49.097  | 53.848   |
| 2     | 11.631    | 19876388 | 831338  | 50.903  | 46.152   |
| Total |           | 39047274 | 1801318 | 100.000 | 100.000  |

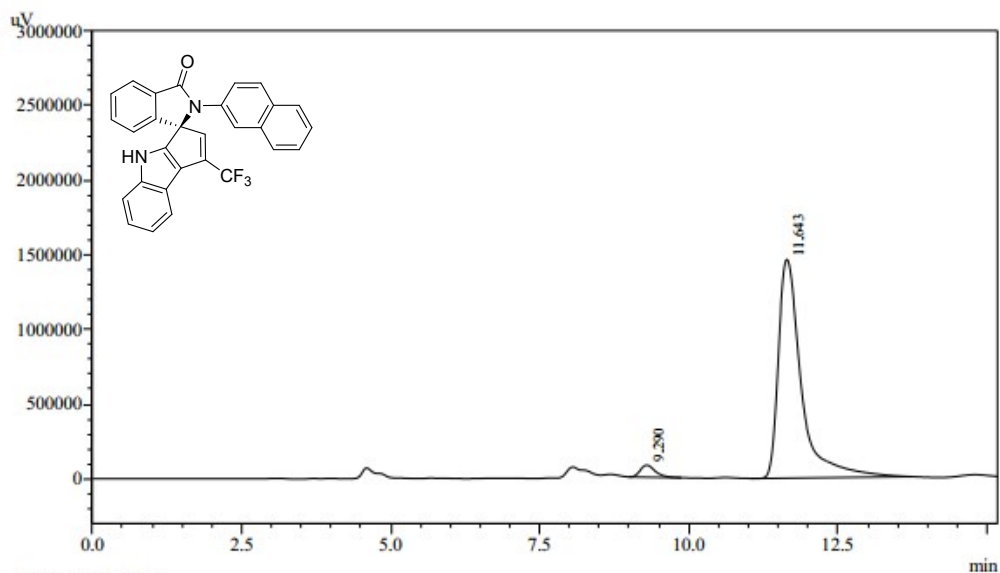

Detector A Ch1 254nm

| Peak# | Ret. Time | Area     | Height  | Area %  | Height % |
|-------|-----------|----------|---------|---------|----------|
| 1     | 9.290     | 1417517  | 80752   | 3.479   | 5.226    |
| 2     | 11.643    | 39329219 | 1464455 | 96.521  | 94.774   |
| Total |           | 40746736 | 1545207 | 100.000 | 100.000  |

**(R)-2'-propyl-1-(trifluoromethyl)-4H-spiro[cyclopenta[b]indole-3,1'-isoindolin]-3'-one (2k)**

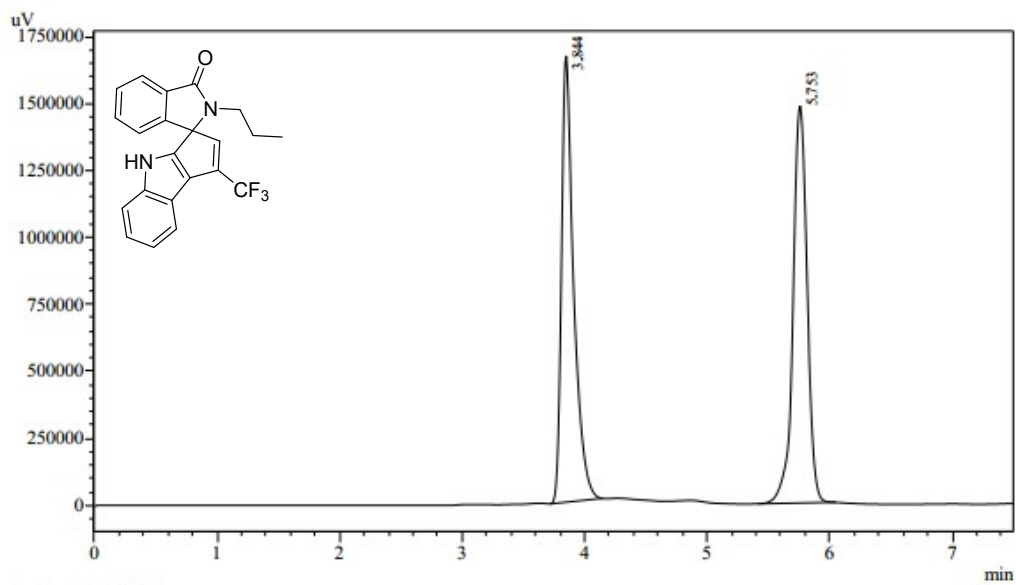

Detector A Ch1 254nm

| Peak# | Ret. Time | Area     | Height  | Area %  | Height % |
|-------|-----------|----------|---------|---------|----------|
| 1     | 3.844     | 11539015 | 1664343 | 49.338  | 52.921   |
| 2     | 5.753     | 11848826 | 1480616 | 50.662  | 47.079   |
| Total |           | 23387842 | 3144959 | 100.000 | 100.000  |

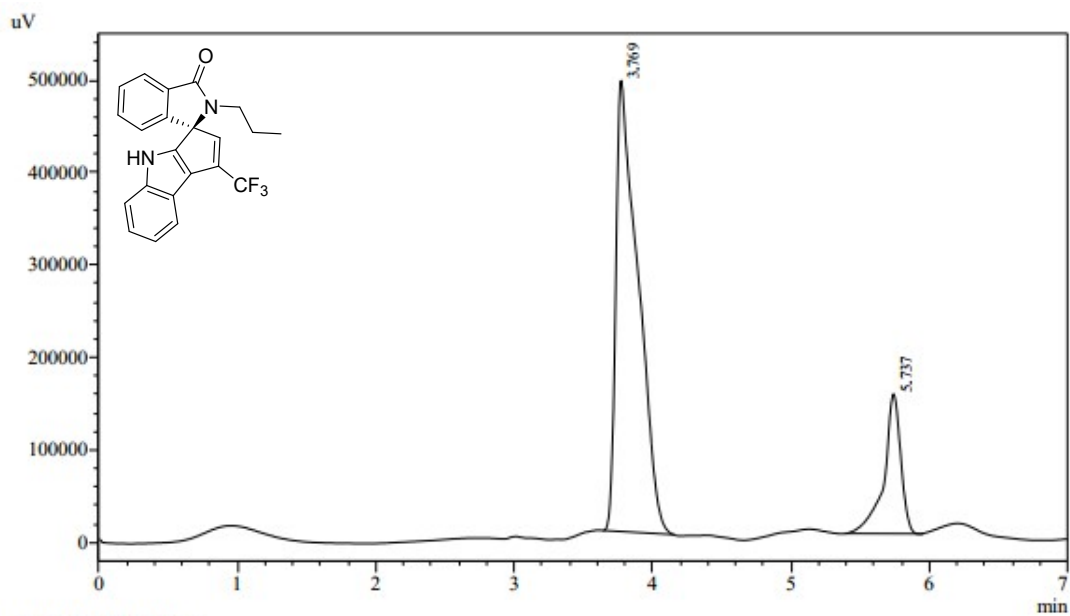

Detector A Ch1 254nm

| Peak# | Ret. Time | Area    | Height | Area %  | Height % |
|-------|-----------|---------|--------|---------|----------|
| 1     | 3.769     | 5434837 | 487661 | 81.038  | 76.352   |
| 2     | 5.737     | 1271716 | 151042 | 18.962  | 23.648   |
| Total |           | 6706553 | 638703 | 100.000 | 100.000  |

**(R)-2'-cyclopropyl-1-(trifluoromethyl)-4H-spiro[cyclopenta[b]indole-3,1'-isoindolin]-3'-one (2l)**

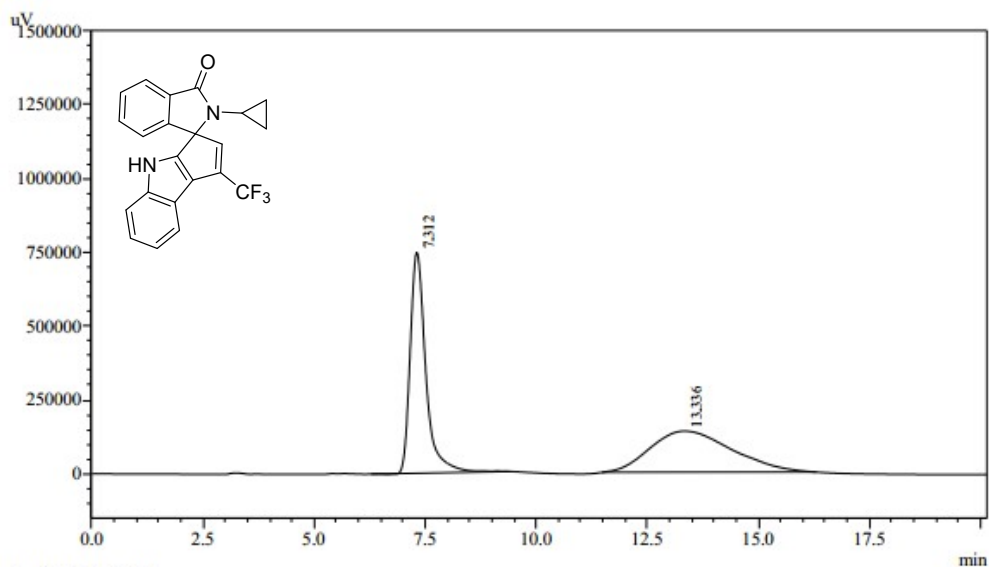

1 Det.A Ch1 / 254nm

Detector A Ch1 254nm

| Peak# | Ret. Time | Area     | Height | Area %  | Height % |
|-------|-----------|----------|--------|---------|----------|
| 1     | 7.312     | 18344297 | 747352 | 50.720  | 84.309   |
| 2     | 13.336    | 17823764 | 139094 | 49.280  | 15.691   |
| Total |           | 36168062 | 886446 | 100.000 | 100.000  |

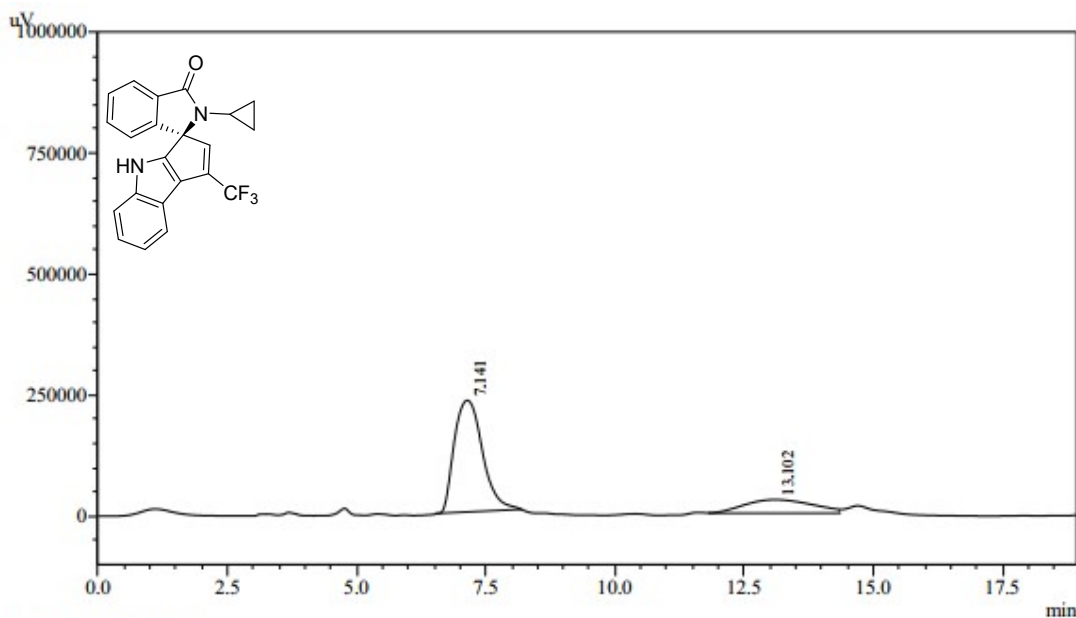

1 Det.A Ch1 / 254nm

Detector A Ch1 254nm

| Peak# | Ret. Time | Area     | Height | Area %  | Height % |
|-------|-----------|----------|--------|---------|----------|
| 1     | 7.141     | 8790244  | 230734 | 77.035  | 89.170   |
| 2     | 13.102    | 2620442  | 28024  | 22.965  | 10.830   |
| Total |           | 11410687 | 258758 | 100.000 | 100.000  |

**(R)-2'-benzyl-1-(trifluoromethyl)-4H-spiro[cyclopenta[b]indole-3,1'-isoindolin]-3'-one (2m)**

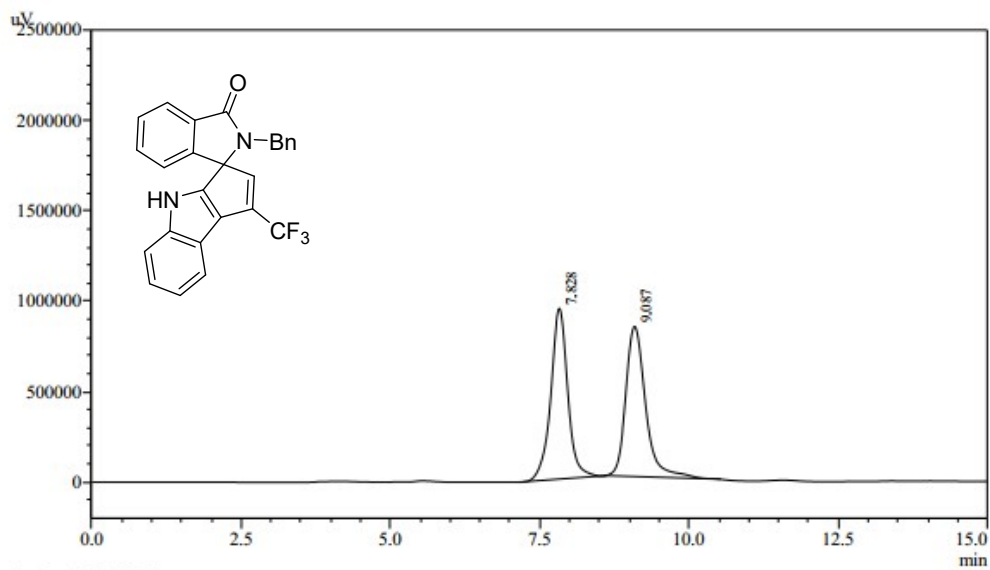

1 Det.A Ch1 / 254nm

Detector A Ch1 254nm

| Peak# | Ret. Time | Area     | Height  | Area %  | Height % |
|-------|-----------|----------|---------|---------|----------|
| 1     | 7.828     | 18737959 | 944920  | 49.405  | 53.232   |
| 2     | 9.087     | 19189199 | 830175  | 50.595  | 46.768   |
| Total |           | 37927157 | 1775094 | 100.000 | 100.000  |

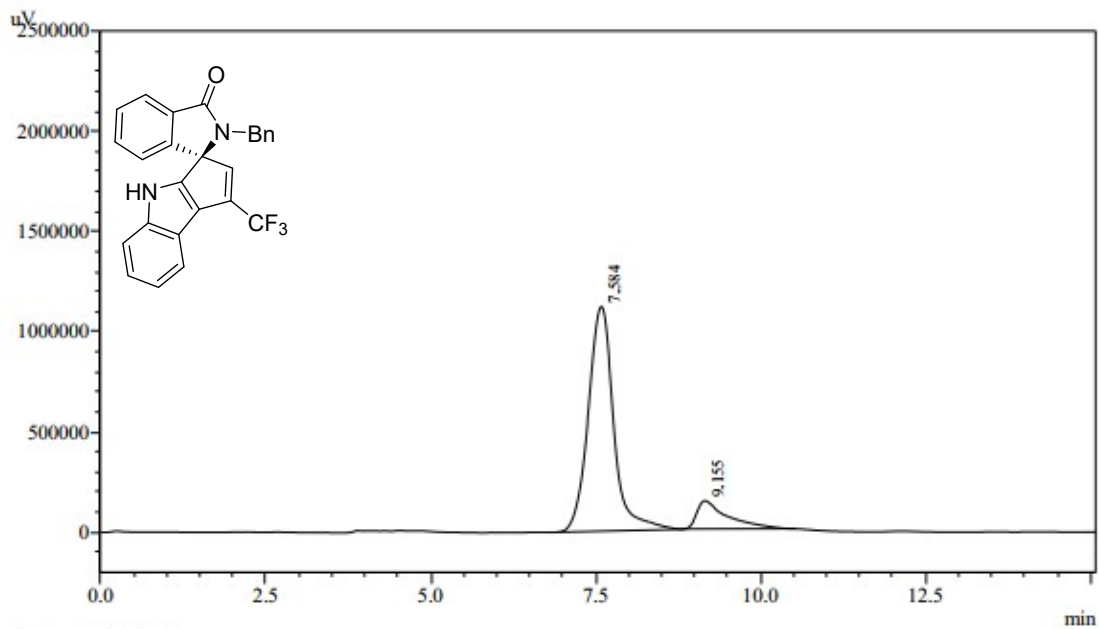

1 Det.A Ch1 / 254nm

Detector A Ch1 254nm

| Peak# | Ret. Time | Area     | Height  | Area %  | Height % |
|-------|-----------|----------|---------|---------|----------|
| 1     | 7.584     | 29936465 | 1120359 | 86.708  | 88.825   |
| 2     | 9.155     | 4589181  | 140958  | 13.292  | 11.175   |
| Total |           | 34525646 | 1261317 | 100.000 | 100.000  |



**(R)-5'-methoxy-2'-phenyl-1-(trifluoromethyl)-4H-spiro[cyclopenta[b]indole-3,1'-isoindolin]-3'-one (2n)**

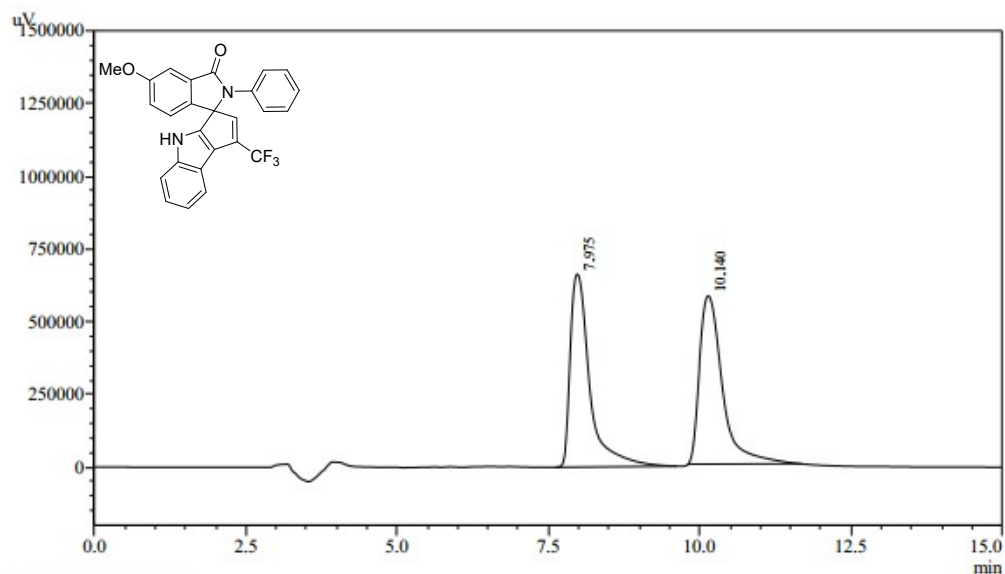

1 Det.A Ch1 / 254nm

Detector A Ch1 254nm

| Peak# | Ret. Time | Area     | Height  | Area %  | Height % |
|-------|-----------|----------|---------|---------|----------|
| 1     | 7.975     | 14872766 | 663401  | 49.231  | 53.398   |
| 2     | 10.140    | 15337243 | 578963  | 50.769  | 46.602   |
| Total |           | 30210008 | 1242364 | 100.000 | 100.000  |

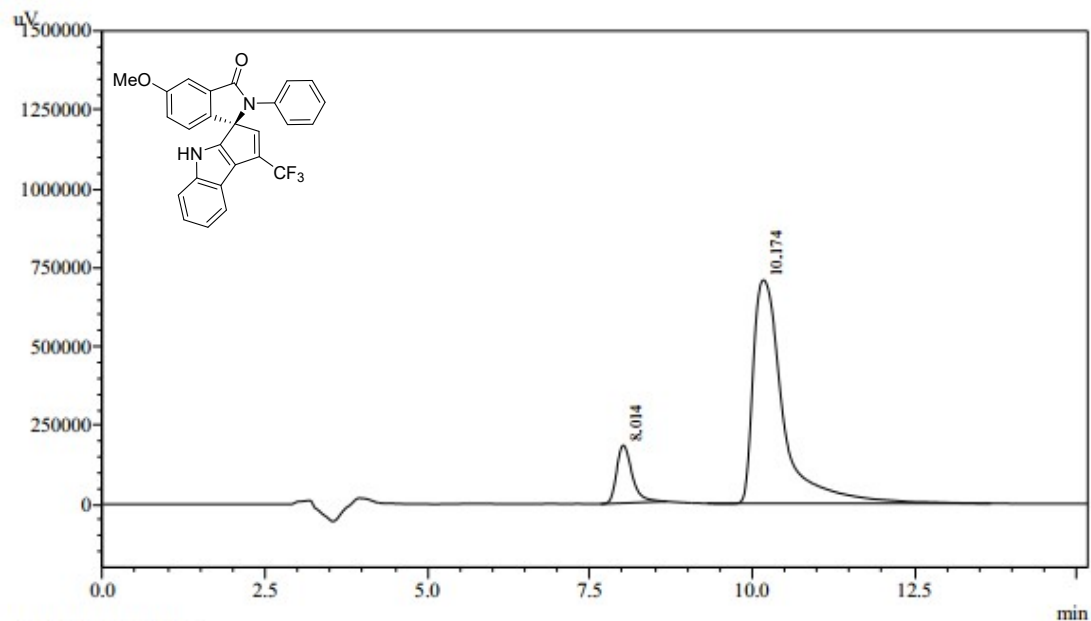

1 Det.A Ch1 / 254nm

Detector A Ch1 254nm

| Peak# | Ret. Time | Area     | Height | Area %  | Height % |
|-------|-----------|----------|--------|---------|----------|
| 1     | 8.014     | 3041936  | 183080 | 11.679  | 20.550   |
| 2     | 10.174    | 23004022 | 707803 | 88.321  | 79.450   |
| Total |           | 26045958 | 890883 | 100.000 | 100.000  |

**(R)-5'-bromo-2'-phenyl-1-(trifluoromethyl)-4H-spiro[cyclopenta[b]indole-3,1'-isoindolin]-3'-one (2o)**

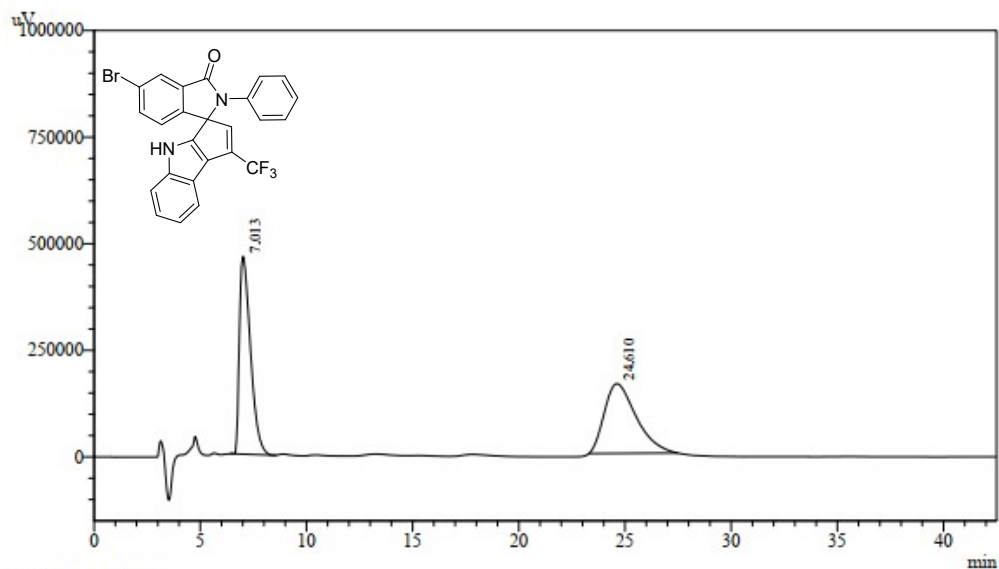

1 Det.A Ch1 / 254nm

Detector A Ch1 254nm

| Peak# | Ret. Time | Area     | Height | Area %  | Height % |
|-------|-----------|----------|--------|---------|----------|
| 1     | 7.013     | 16797647 | 463658 | 49.621  | 73.942   |
| 2     | 24.610    | 17054360 | 163399 | 50.379  | 26.058   |
| Total |           | 33852007 | 627057 | 100.000 | 100.000  |

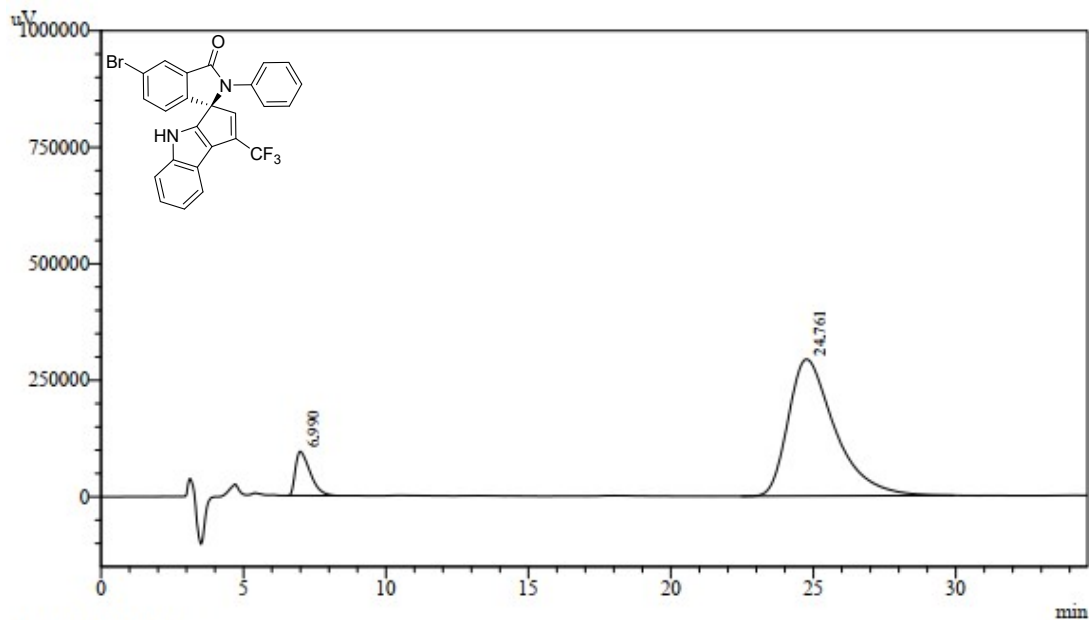

1 Det.A Ch1 / 254nm

Detector A Ch1 254nm

| Peak# | Ret. Time | Area     | Height | Area %  | Height % |
|-------|-----------|----------|--------|---------|----------|
| 1     | 6.990     | 3402575  | 94746  | 9.222   | 24.413   |
| 2     | 24.761    | 33493306 | 293358 | 90.778  | 75.587   |
| Total |           | 36895881 | 388104 | 100.000 | 100.000  |

**(R)-5'-methyl-2'-phenyl-1-(trifluoromethyl)-4H-spiro[cyclopenta[b]indole-3,1'-isoindolin]-3'-one (2p)**

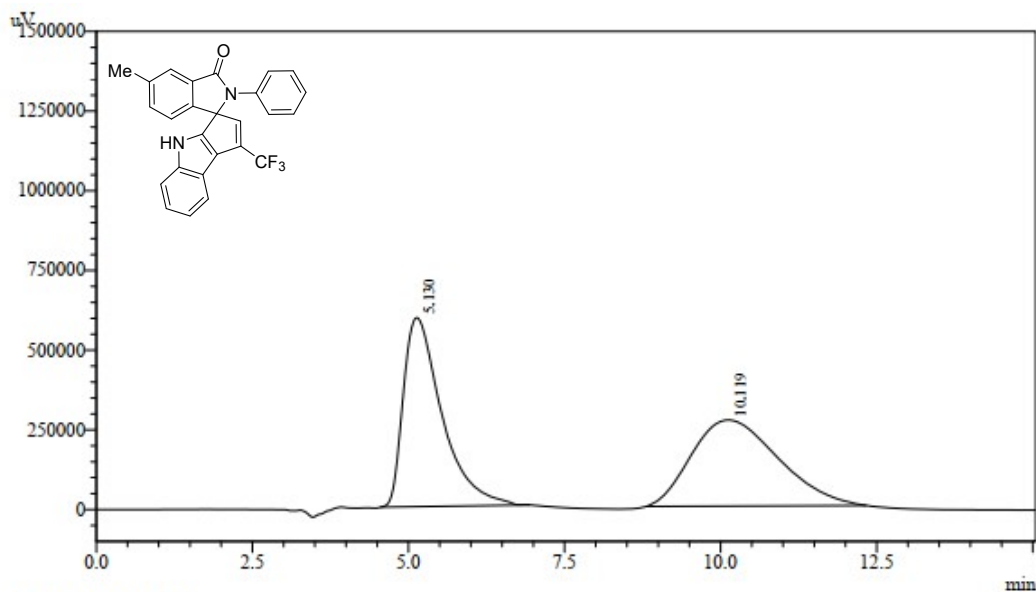

1 Det.A Ch1 / 254nm

Detector A Ch1 254nm

| Peak# | Ret. Time | Area     | Height | Area %  | Height % |
|-------|-----------|----------|--------|---------|----------|
| 1     | 5.130     | 25503772 | 592922 | 49.411  | 68.695   |
| 2     | 10.119    | 26111404 | 270196 | 50.589  | 31.305   |
| Total |           | 51615176 | 863118 | 100.000 | 100.000  |

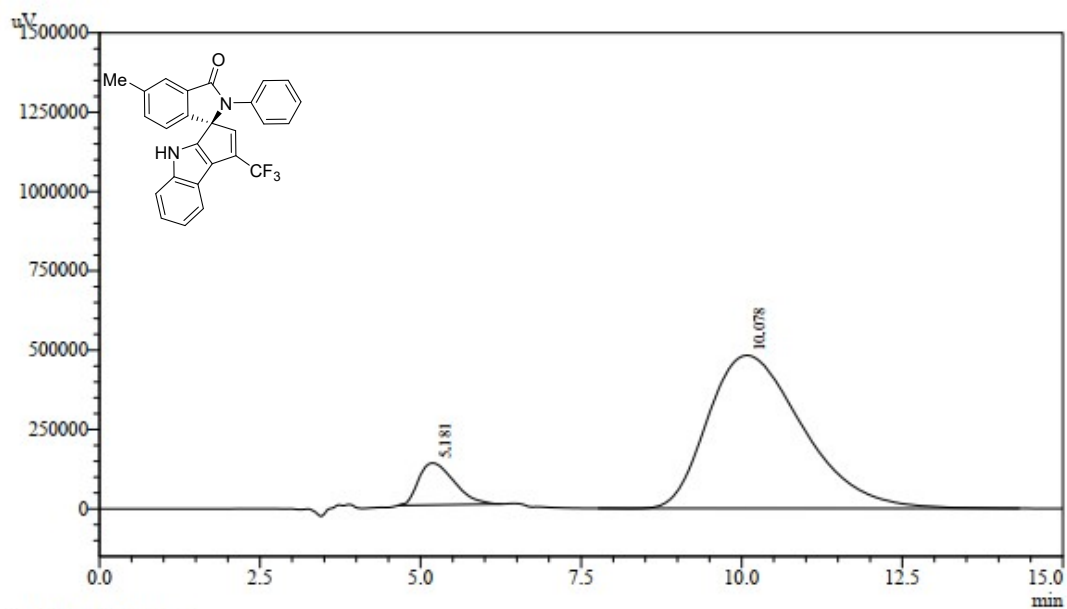

1 Det.A Ch1 / 254nm

Detector A Ch1 254nm

| Peak# | Ret. Time | Area     | Height | Area %  | Height % |
|-------|-----------|----------|--------|---------|----------|
| 1     | 5.181     | 5107482  | 132798 | 9.308   | 21.590   |
| 2     | 10.078    | 49763356 | 482289 | 90.692  | 78.410   |
| Total |           | 54870838 | 615086 | 100.000 | 100.000  |

**(R)-5'-fluoro-2'-phenyl-1-(trifluoromethyl)-4H-spiro[cyclopenta[b]indole-3,1'-isoindolin]-3'-one (2q)**

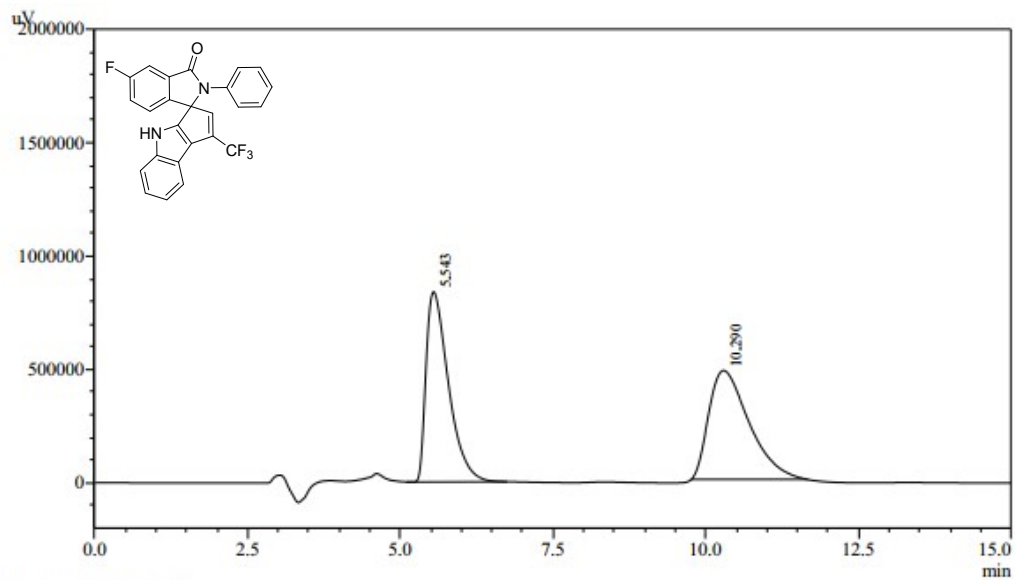

1 Det.A Ch1 / 254nm

Detector A Ch1 254nm

| Peak# | Ret. Time | Area     | Height  | Area %  | Height % |
|-------|-----------|----------|---------|---------|----------|
| 1     | 5.543     | 21499276 | 839147  | 49.311  | 63.606   |
| 2     | 10.290    | 22100513 | 480135  | 50.689  | 36.394   |
| Total |           | 43599790 | 1319282 | 100.000 | 100.000  |

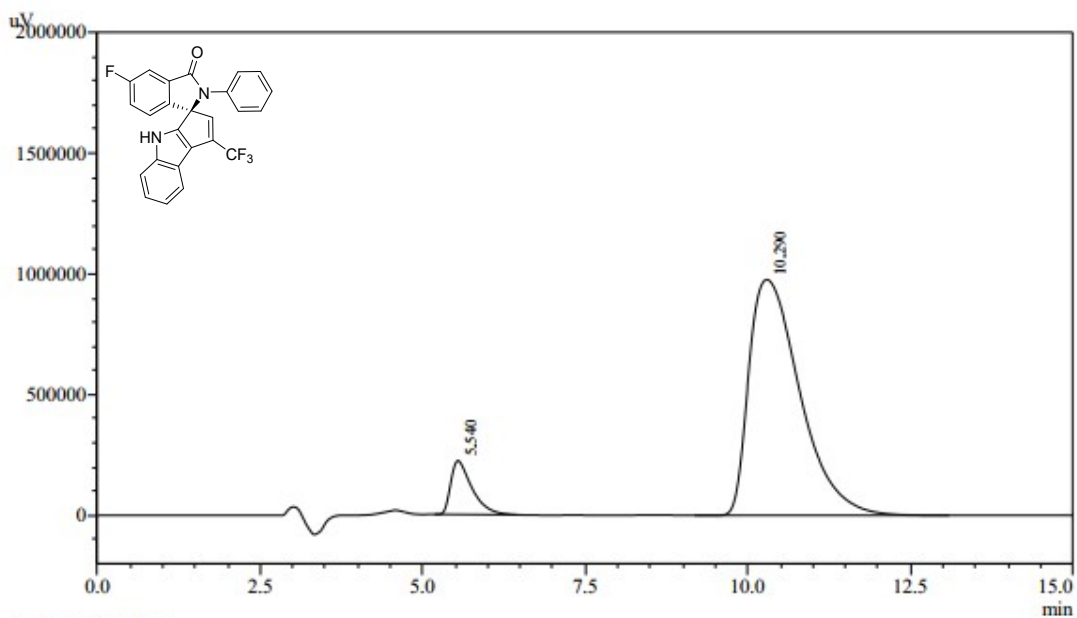

1 Det.A Ch1 / 254nm

Detector A Ch1 254nm

| Peak# | Ret. Time | Area     | Height  | Area %  | Height % |
|-------|-----------|----------|---------|---------|----------|
| 1     | 5.540     | 5046401  | 222770  | 8.639   | 18.569   |
| 2     | 10.290    | 53367400 | 976907  | 91.361  | 81.431   |
| Total |           | 58413802 | 1199677 | 100.000 | 100.000  |

**(R)-5'-chloro-2'-phenyl-1-(trifluoromethyl)-4H-spiro[cyclopenta[b]indole-3,1'-isoindolin]-3'-one (2r)**

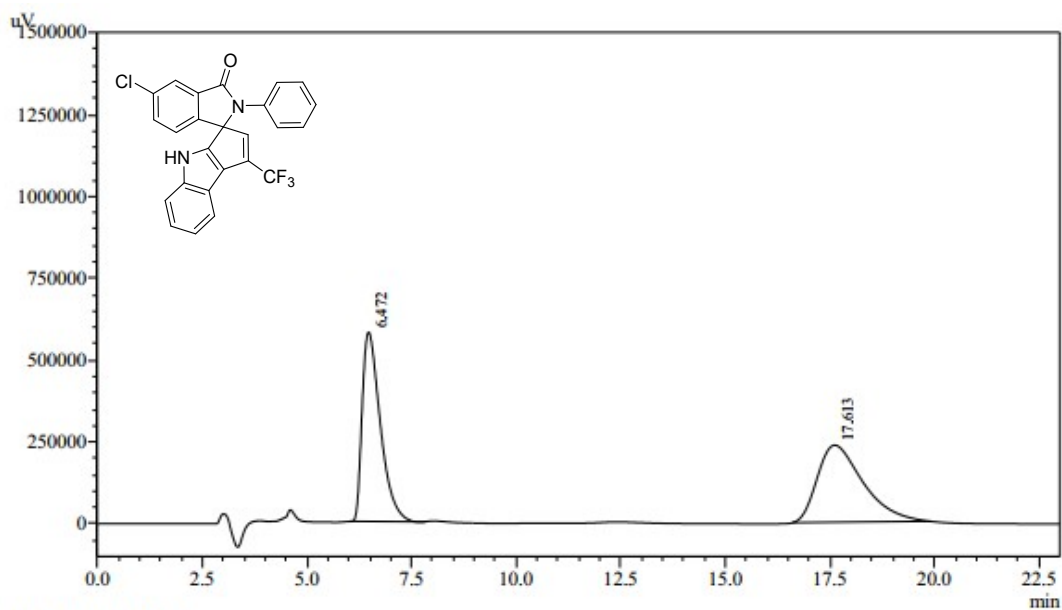

1 Det.A Ch1 / 254nm

Detector A Ch1 254nm

| Peak# | Ret. Time | Area     | Height | Area %  | Height % |
|-------|-----------|----------|--------|---------|----------|
| 1     | 6.472     | 17473308 | 578122 | 49.383  | 71.057   |
| 2     | 17.613    | 17909715 | 235486 | 50.617  | 28.943   |
| Total |           | 35383023 | 813608 | 100.000 | 100.000  |

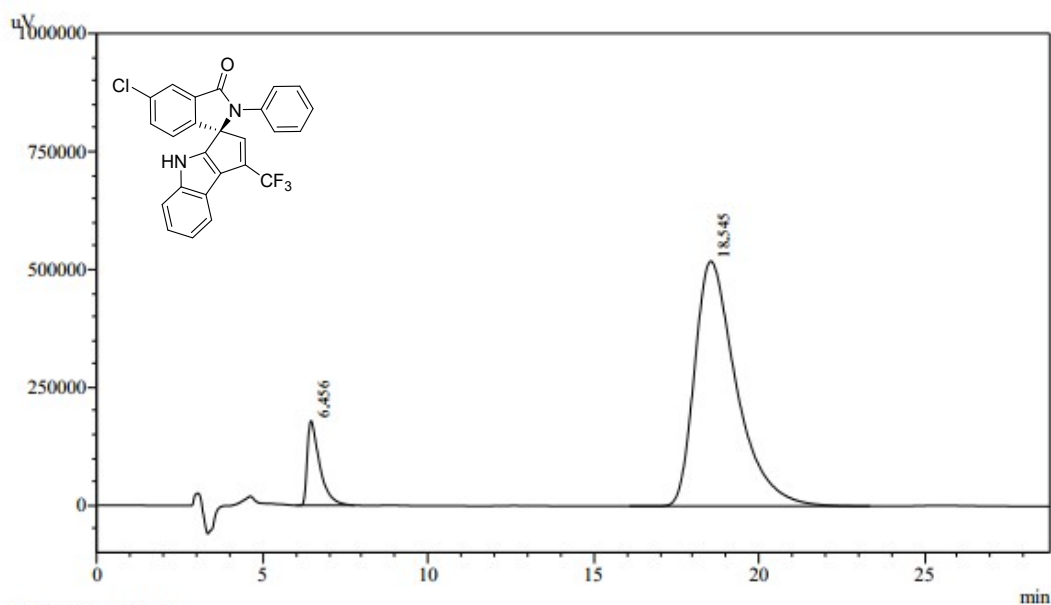

1 Det.A Ch1 / 254nm

Detector A Ch1 254nm

| Peak# | Ret. Time | Area     | Height | Area %  | Height % |
|-------|-----------|----------|--------|---------|----------|
| 1     | 6.456     | 4665111  | 179105 | 9.286   | 25.639   |
| 2     | 18.545    | 45574981 | 519465 | 90.714  | 74.361   |
| Total |           | 50240092 | 698571 | 100.000 | 100.000  |

**(R)-6'-bromo-2'-phenyl-1-(trifluoromethyl)-4H-spiro[cyclopenta[b]indole-3,1'-isoindolin]-3'-one (2s)**

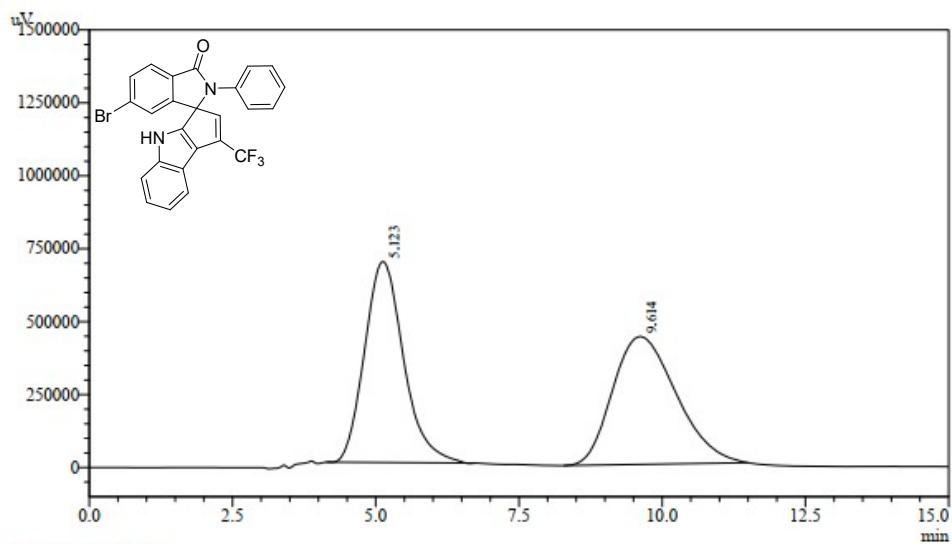

1 Det.A Ch1 / 254nm

Detector A Ch1 254nm

| Peak# | Ret. Time | Area     | Height  | Area %  | Height % |
|-------|-----------|----------|---------|---------|----------|
| 1     | 5.123     | 32648140 | 688770  | 49.101  | 61.125   |
| 2     | 9.614     | 33843152 | 438051  | 50.899  | 38.875   |
| Total |           | 66491292 | 1126822 | 100.000 | 100.000  |

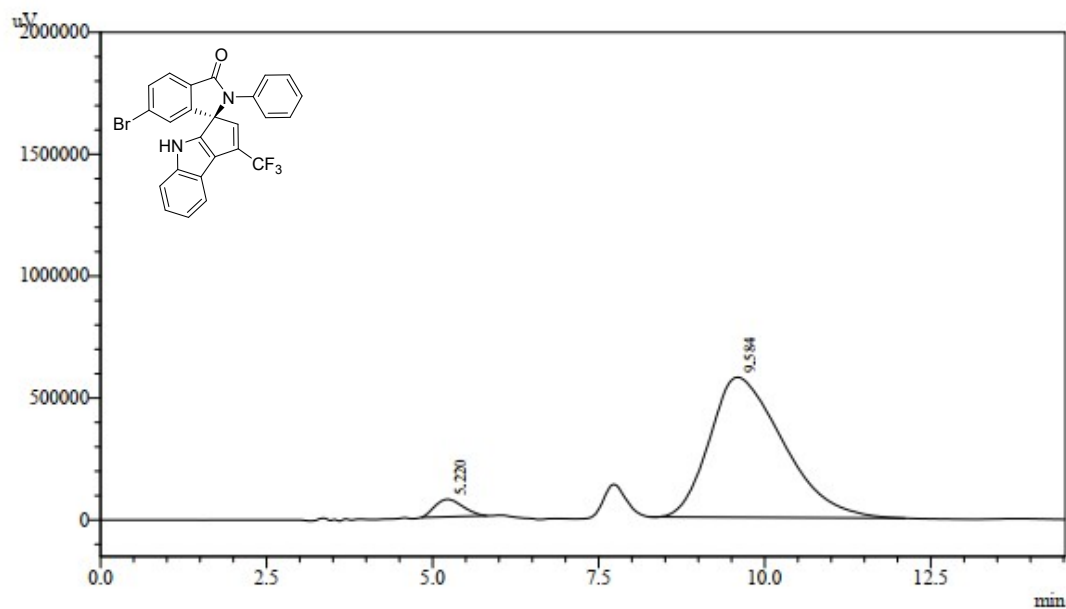

1 Det.A Ch1 / 254nm

Detector A Ch1 254nm

| Peak# | Ret. Time | Area     | Height | Area %  | Height % |
|-------|-----------|----------|--------|---------|----------|
| 1     | 5.220     | 2116028  | 71967  | 4.560   | 11.128   |
| 2     | 9.584     | 44289617 | 574769 | 95.440  | 88.872   |
| Total |           | 46405645 | 646736 | 100.000 | 100.000  |

**(R)-6'-chloro-2'-phenyl-1-(trifluoromethyl)-4H-spiro[cyclopenta[b]indole-3,1'-isoindolin]-3'-one (2t)**

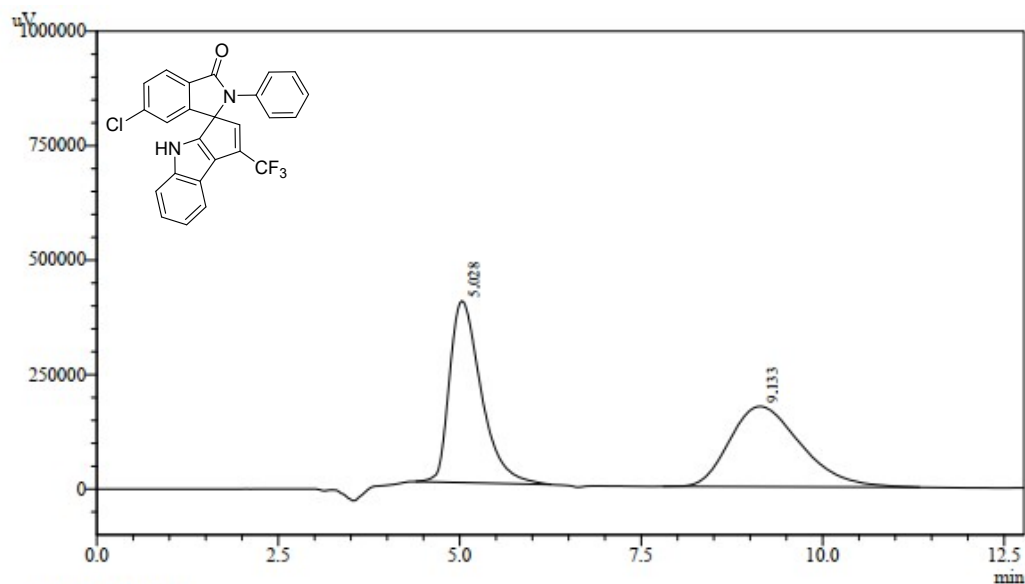

1 Det.A Ch1 / 254nm

Detector A Ch1 254nm

| Peak# | Ret. Time | Area     | Height | Area %  | Height % |
|-------|-----------|----------|--------|---------|----------|
| 1     | 5.028     | 12041417 | 396428 | 50.162  | 69.331   |
| 2     | 9.133     | 11963868 | 175360 | 49.838  | 30.669   |
| Total |           | 24005285 | 571788 | 100.000 | 100.000  |

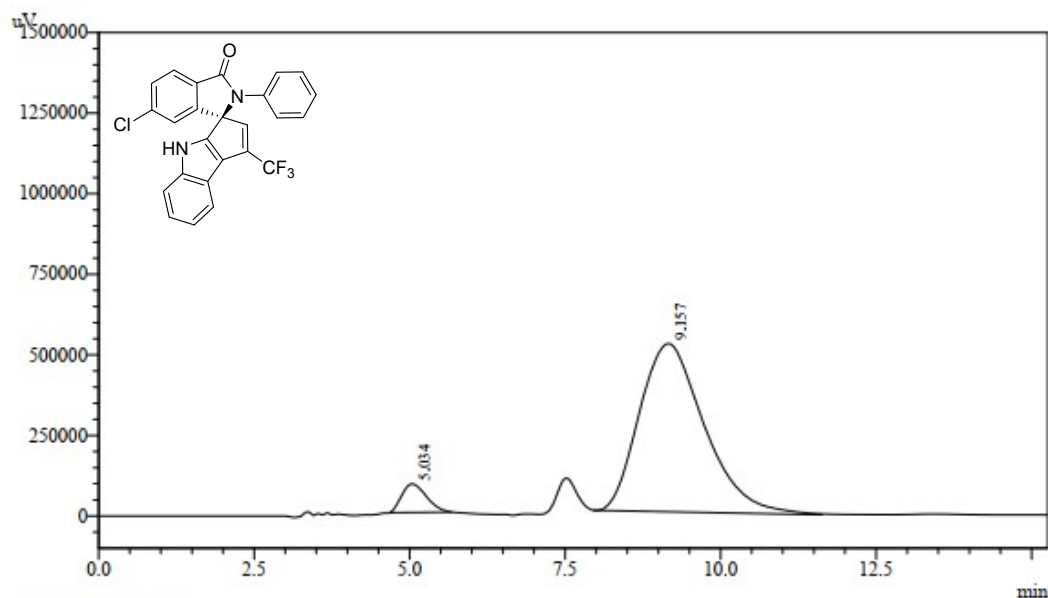

1 Det.A Ch1 / 254nm

Detector A Ch1 254nm

| Peak# | Ret. Time | Area     | Height | Area %  | Height % |
|-------|-----------|----------|--------|---------|----------|
| 1     | 5.034     | 2443263  | 88489  | 6.052   | 14.498   |
| 2     | 9.157     | 37926738 | 521861 | 93.948  | 85.502   |
| Total |           | 40370000 | 610351 | 100.000 | 100.000  |

**(R)-7-chloro-2'-phenyl-1-(trifluoromethyl)-4H-spiro[cyclopenta[b]indole-3,1'-isoindolin]-3'-one (2u)**

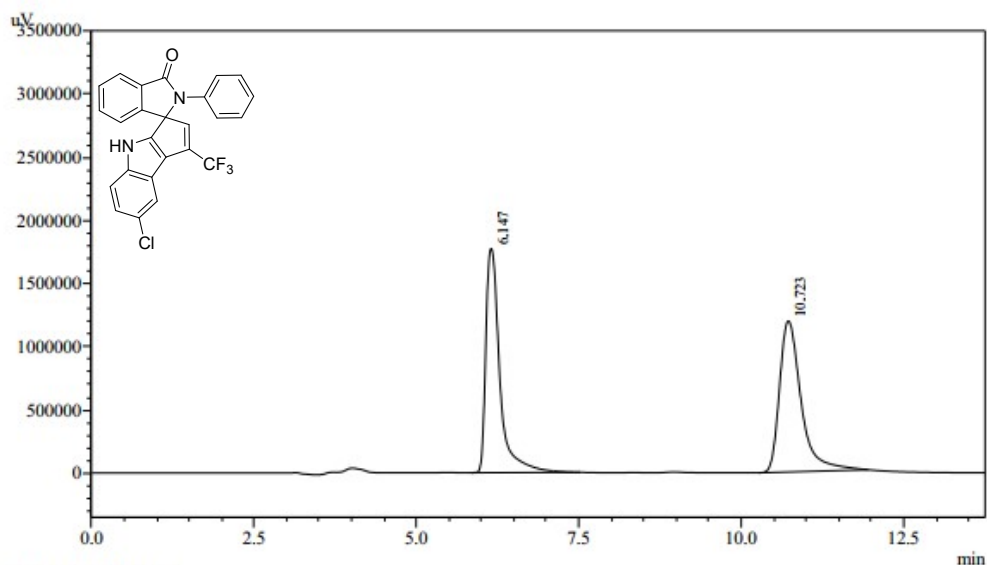

1 Det.A Ch1 / 254nm

Detector A Ch1 254nm

| Peak# | Ret. Time | Area     | Height  | Area %  | Height % |
|-------|-----------|----------|---------|---------|----------|
| 1     | 6.147     | 26690716 | 1775303 | 49.113  | 59.752   |
| 2     | 10.723    | 27654718 | 1195804 | 50.887  | 40.248   |
| Total |           | 54345434 | 2971107 | 100.000 | 100.000  |

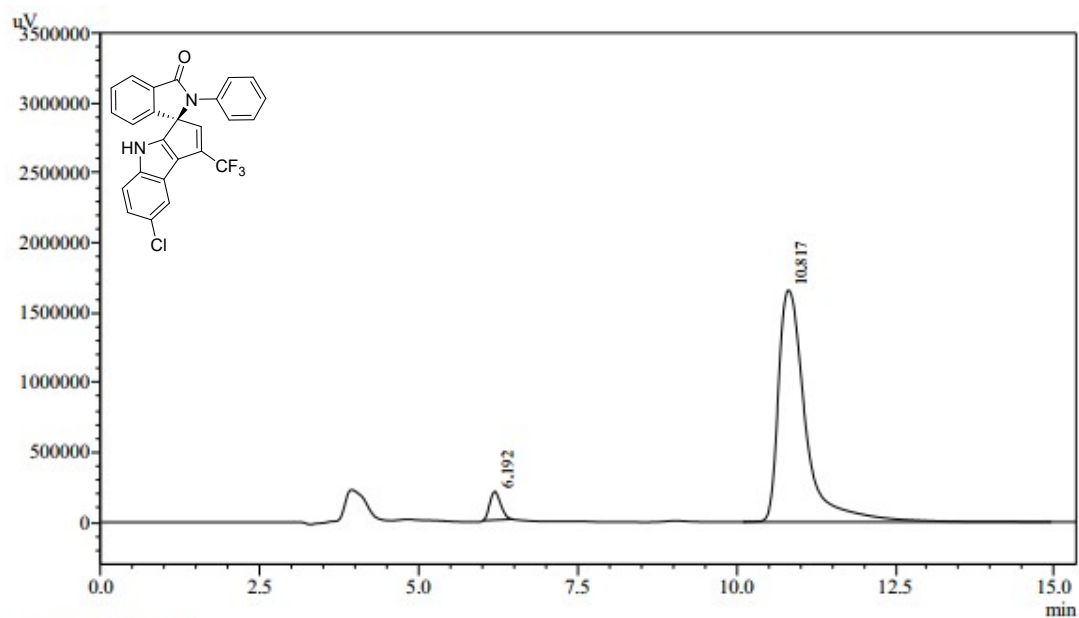

1 Det.A Ch1 / 254nm

Detector A Ch1 254nm

| Peak# | Ret. Time | Area     | Height  | Area %  | Height % |
|-------|-----------|----------|---------|---------|----------|
| 1     | 6.192     | 2426047  | 203131  | 4.677   | 10.916   |
| 2     | 10.817    | 49440561 | 1657699 | 95.323  | 89.084   |
| Total |           | 51866608 | 1860830 | 100.000 | 100.000  |



**(R)-7-bromo-2'-phenyl-1-(trifluoromethyl)-4H-spiro[cyclopenta[b]indole-3,1'-isoindolin]-3'-one (2v)**

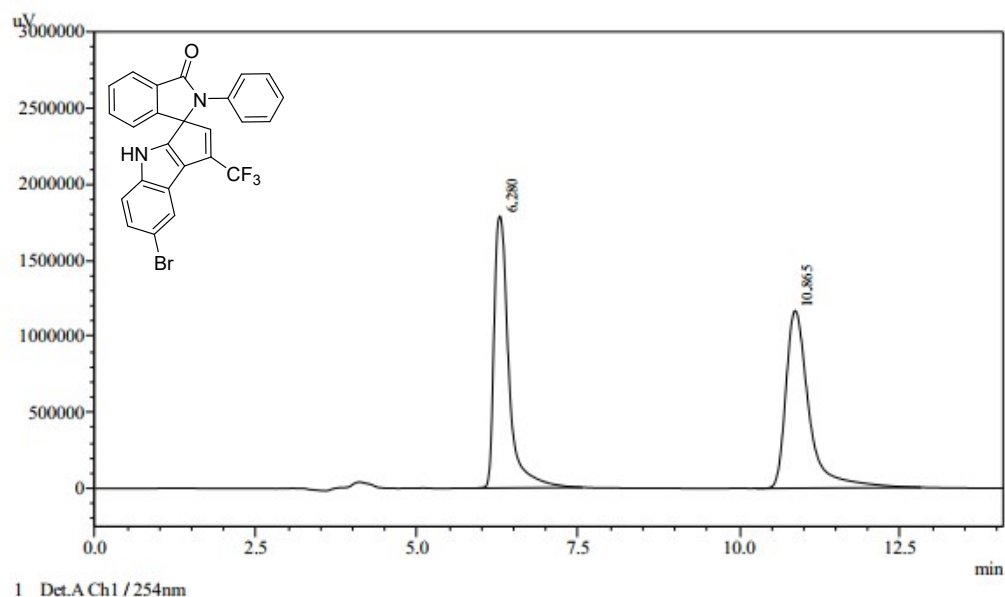

Detector A Ch1 254nm

| Peak# | Ret. Time | Area     | Height  | Area %  | Height % |
|-------|-----------|----------|---------|---------|----------|
| 1     | 6.280     | 28376056 | 1787672 | 49.280  | 60.515   |
| 2     | 10.865    | 29204853 | 1166442 | 50.720  | 39.485   |
| Total |           | 57580909 | 2954113 | 100.000 | 100.000  |

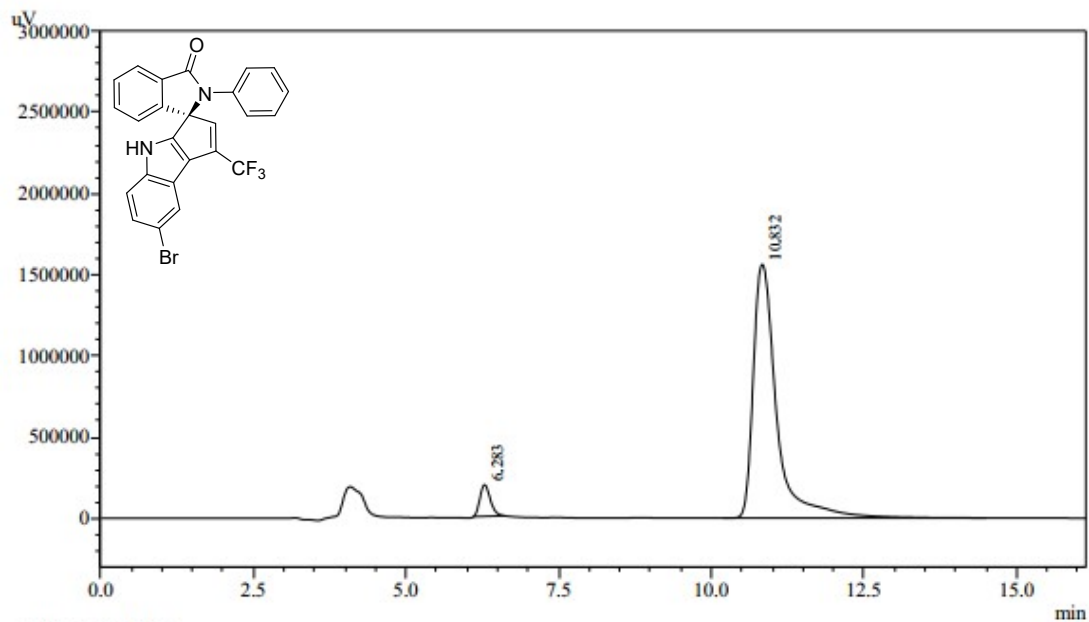

Detector A Ch1 254nm

| Peak# | Ret. Time | Area     | Height  | Area %  | Height % |
|-------|-----------|----------|---------|---------|----------|
| 1     | 6.283     | 2296409  | 194031  | 5.227   | 11.050   |
| 2     | 10.832    | 41633772 | 1561967 | 94.773  | 88.950   |
| Total |           | 43930181 | 1755998 | 100.000 | 100.000  |

**(R)-6-methyl-2'-phenyl-1-(trifluoromethyl)-4H-spiro[cyclopenta[b]indole-3,1'-isoindolin]-3'-one (2w)**

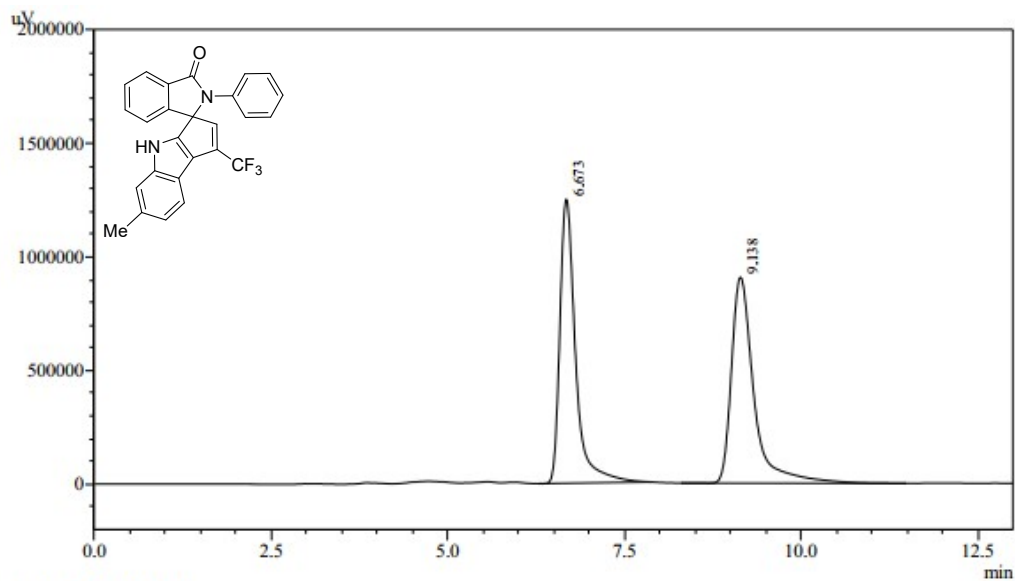

1 Det.A Ch1 / 254nm

Detector A Ch1 254nm

| Peak# | Ret. Time | Area     | Height  | Area %  | Height % |
|-------|-----------|----------|---------|---------|----------|
| 1     | 6.673     | 19336508 | 1251278 | 49.049  | 57.992   |
| 2     | 9.138     | 20086162 | 906399  | 50.951  | 42.008   |
| Total |           | 39422670 | 2157677 | 100.000 | 100.000  |

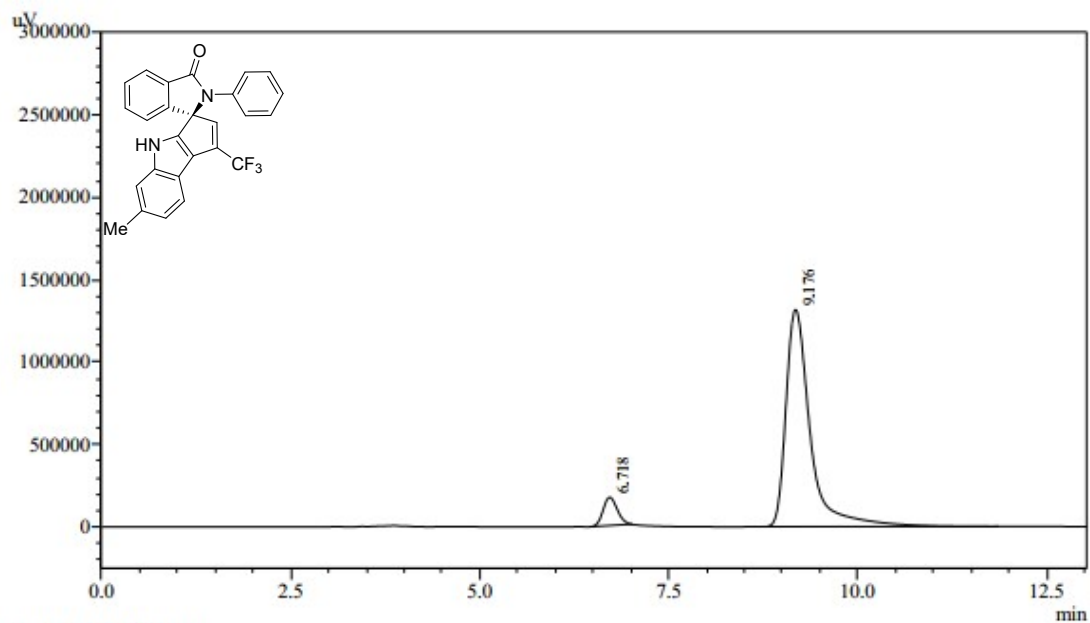

1 Det.A Ch1 / 254nm

Detector A Ch1 254nm

| Peak# | Ret. Time | Area     | Height  | Area %  | Height % |
|-------|-----------|----------|---------|---------|----------|
| 1     | 6.718     | 2233914  | 171556  | 7.007   | 11.529   |
| 2     | 9.176     | 29647621 | 1316520 | 92.993  | 88.471   |
| Total |           | 31881535 | 1488076 | 100.000 | 100.000  |

**(R)-5-methoxy-2'-phenyl-1-(trifluoromethyl)-4H-spiro[cyclopenta[b]indole-3,1'-isoindolin]-3'-one (2x)**

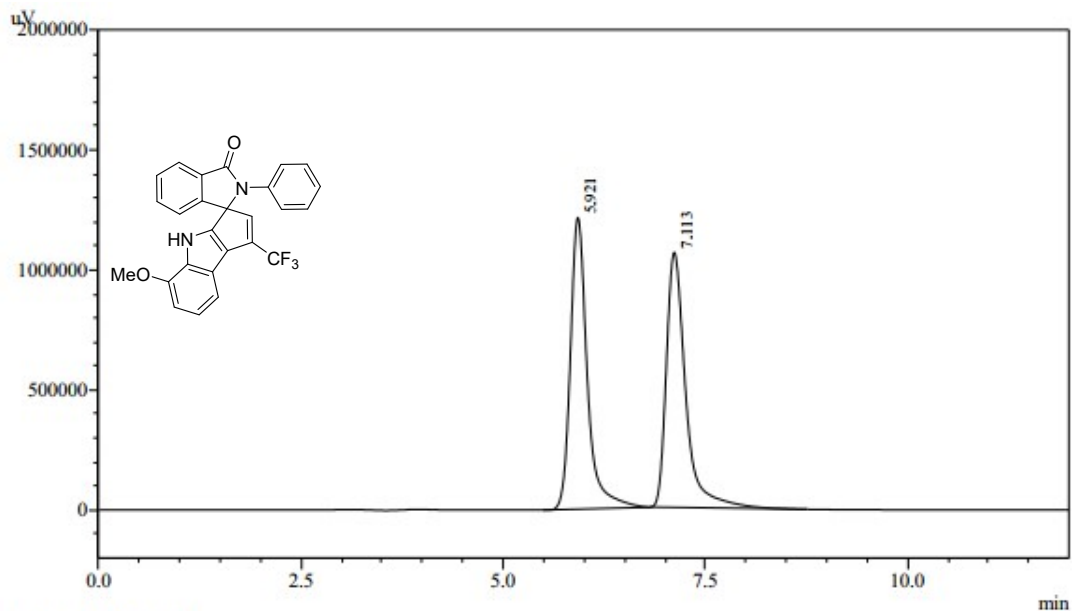

1 Det.A Ch1 / 254nm

Detector A Ch1 254nm

| Peak# | Ret. Time | Area     | Height  | Area %  | Height % |
|-------|-----------|----------|---------|---------|----------|
| 1     | 5.921     | 17663228 | 1215676 | 49.890  | 53.338   |
| 2     | 7.113     | 17741068 | 1063530 | 50.110  | 46.662   |
| Total |           | 35404296 | 2279206 | 100.000 | 100.000  |

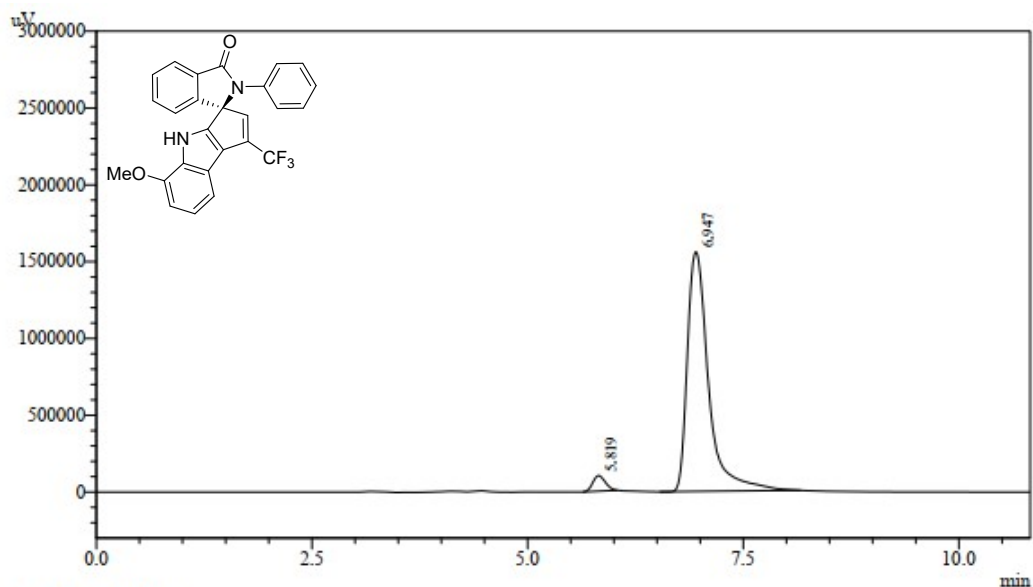

1 Det.A Ch1 / 254nm

Detector A Ch1 254nm

| Peak# | Ret. Time | Area     | Height  | Area %  | Height % |
|-------|-----------|----------|---------|---------|----------|
| 1     | 5.819     | 1021481  | 101577  | 3.678   | 6.114    |
| 2     | 6.947     | 26753830 | 1559688 | 96.322  | 93.886   |
| Total |           | 27775310 | 1661265 | 100.000 | 100.000  |

**4-Methyl-2'-phenyl-1-(trifluoromethyl)-4H-spiro[cyclopenta[b]indole-3,1'-isoindolin]-3'-one (4)**

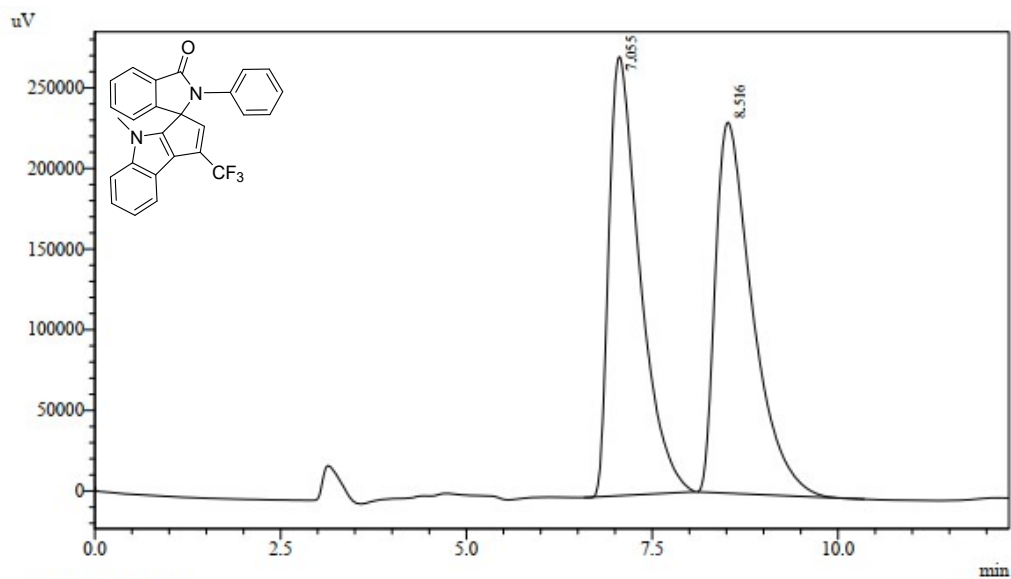

1 Det.A Ch1 / 220nm

Detector A Ch1 220nm

| Peak# | Ret. Time | Area     | Height | Area %  | Height % |
|-------|-----------|----------|--------|---------|----------|
| 1     | 7.055     | 7876054  | 272165 | 49.692  | 54.210   |
| 2     | 8.516     | 7973821  | 229889 | 50.308  | 45.790   |
| Total |           | 15849876 | 502054 | 100.000 | 100.000  |

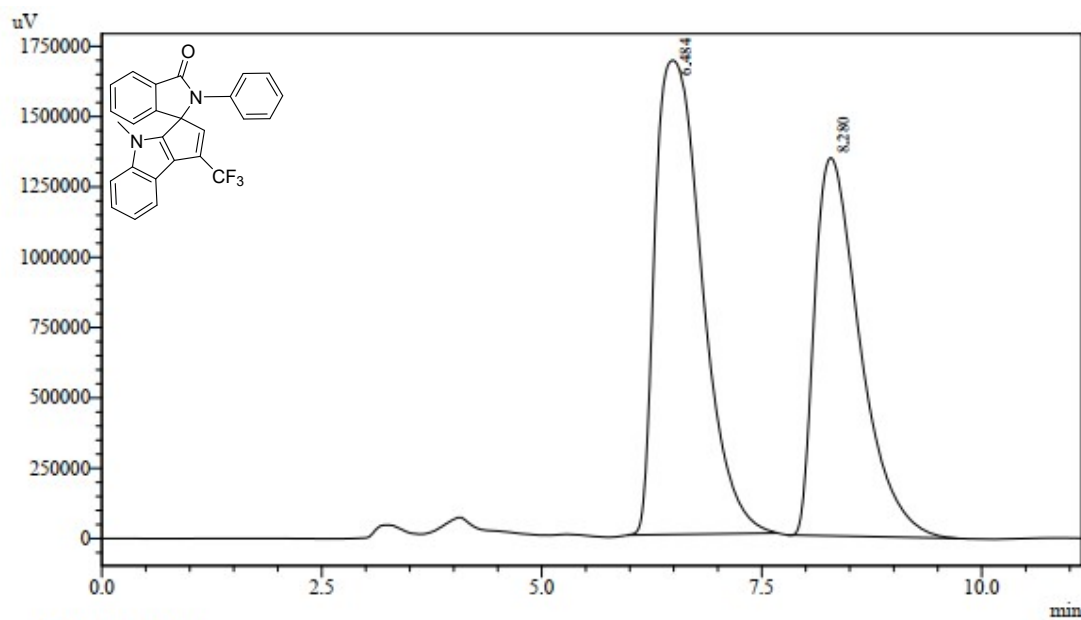

1 Det.A Ch1 / 220nm

Detector A Ch1 220nm

| Peak# | Ret. Time | Area      | Height  | Area %  | Height % |
|-------|-----------|-----------|---------|---------|----------|
| 1     | 6.484     | 62536408  | 1685506 | 56.397  | 55.643   |
| 2     | 8.280     | 48349871  | 1343653 | 43.603  | 44.357   |
| Total |           | 110886280 | 3029159 | 100.000 | 100.000  |

**(R)-2'-(4-bromophenyl)-1-(trifluoromethyl)-4H-spiro[cyclopenta[b]indole-3,1'-isoindoline] (6)**

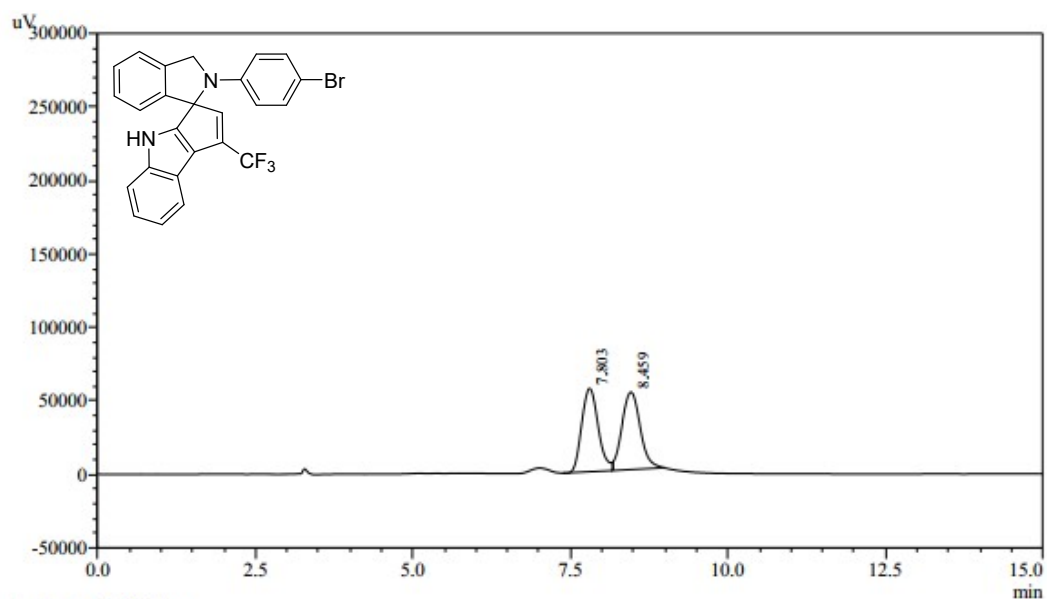

1 Det.A Ch1 / 254nm

Detector A Ch1 254nm

| Peak# | Ret. Time | Area    | Height | Area %  | Height % |
|-------|-----------|---------|--------|---------|----------|
| 1     | 7.803     | 1040559 | 56715  | 49.304  | 51.832   |
| 2     | 8.459     | 1069955 | 52706  | 50.696  | 48.168   |
| Total |           | 2110514 | 109422 | 100.000 | 100.000  |

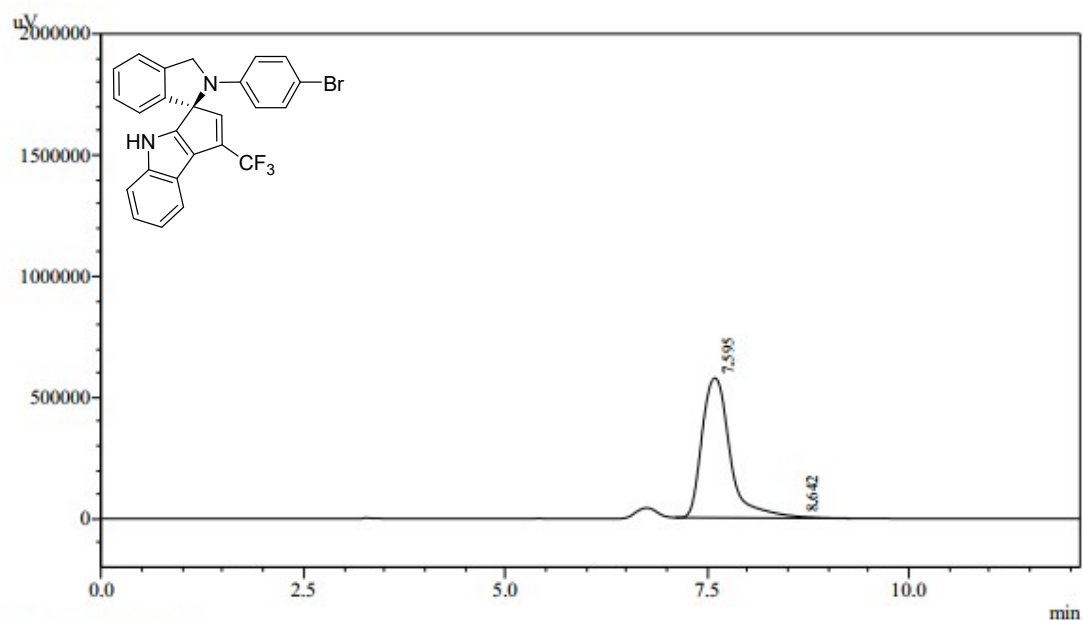

1 Det.A Ch1 / 254nm

Detector A Ch1 254nm

| Peak# | Ret. Time | Area     | Height | Area %  | Height % |
|-------|-----------|----------|--------|---------|----------|
| 1     | 7.595     | 14009856 | 577070 | 99.485  | 98.878   |
| 2     | 8.642     | 72503    | 6550   | 0.515   | 1.122    |
| Total |           | 14082360 | 583619 | 100.000 | 100.000  |

**(R)-2'-([1,1'-biphenyl]-4-yl)-1-(trifluoromethyl)-4H-spiro[cyclopenta  
[b]indole-3,1'-isoindolin]-3'-one (7)**

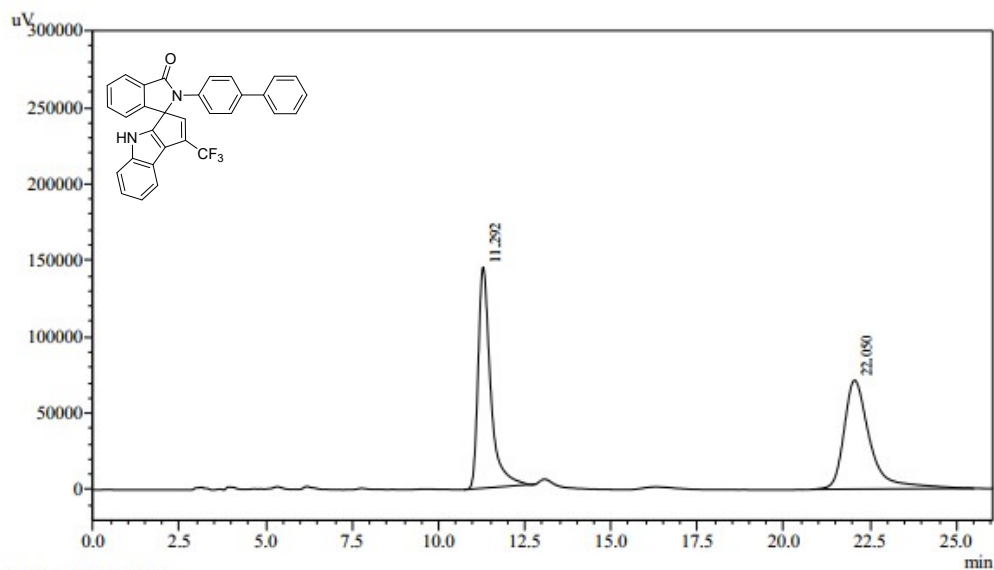

1 Det.A Ch1 / 254nm

Detector A Ch1 254nm

| Peak# | Ret. Time | Area    | Height | Area %  | Height % |
|-------|-----------|---------|--------|---------|----------|
| 1     | 11.292    | 3627436 | 144450 | 49.274  | 66.985   |
| 2     | 22.050    | 3734293 | 71194  | 50.726  | 33.015   |
| Total |           | 7361729 | 215645 | 100.000 | 100.000  |

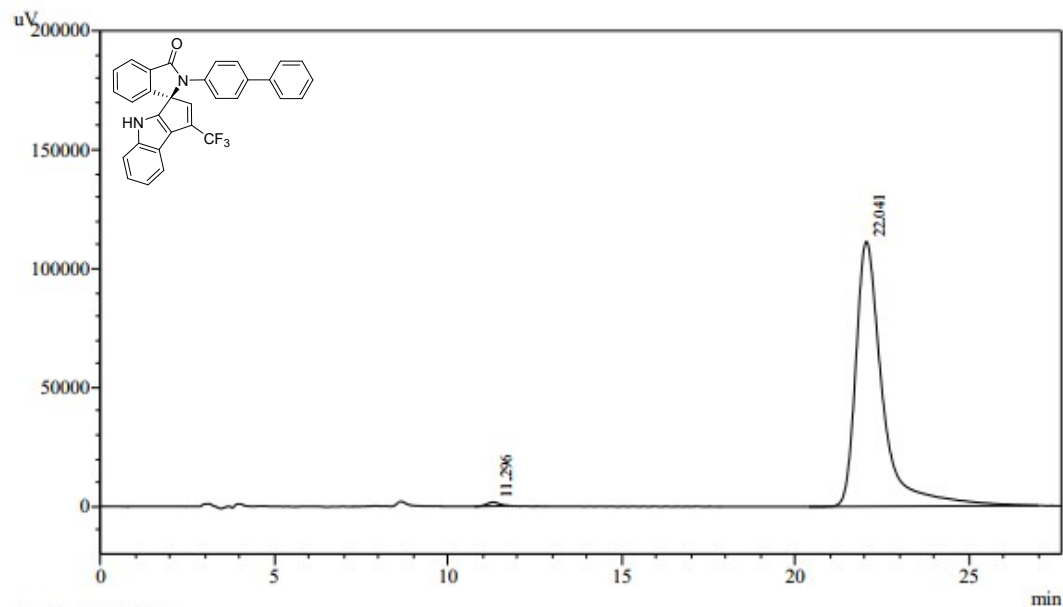

1 Det.A Ch1 / 254nm

Detector A Ch1 254nm

| Peak# | Ret. Time | Area    | Height | Area %  | Height % |
|-------|-----------|---------|--------|---------|----------|
| 1     | 11.296    | 40895   | 1674   | 0.681   | 1.479    |
| 2     | 22.041    | 5964492 | 111520 | 99.319  | 98.521   |
| Total |           | 6005388 | 113194 | 100.000 | 100.000  |
